# Supplementary material for: A new non-destructive method to decipher the origin of organic matter in fossils using Raman spectroscopy
Source: Royal Society of Chemistry journal article supplement (doi:10.1039/d4ra04364b), 2024-01-01
Supplement: d4ra04364b1.xlsx [file d4ra04364b1.xlsx]

## Sheet: Sheet1
Dataset S1 - List of major Raman bands and peaks in the samples analysed. (Phe) phenylalanine.
Molecule	Frequency (cm-1)	Assignment	Reference(s)
melanin	1350	D band	Huang et al., 2004
	1580	G band
keratin	500	S–S	Mattiello et al., 2023
	850	H-bonding
	1000	aromatic ring (Phe)
	1200–1300	amide III
	1448	CH2 group
	1600–1700	amide I
chitin	900	C–O–C	Gierlinger et al., 2013; Tsurkan et al., 2021
	957	C–O, C–C
	1045	C–O, C–N
	1116	C–C antisymmetric ring modes
	1211	C–N stretching and N–H deformation
	1230–1500	CH2 wagging and bending
	1630	C=O stretching coupled to NH and OH
	1665	C=O stretching coupled to NH
carotenoid	1521–1523	C=C	Badgujar et al., 2021
	1156–1158	C–C
	1005–1008	CH3 coupled with C–C of the polyene chain
kerogen	1350	D band	Schito et al., 2022
	1582	G band
