# Supplementary material for: A new non-destructive method to decipher the origin of organic matter in fossils using Raman spectroscopy
Source: Royal Society of Chemistry journal article supplement (doi:10.1039/d4ra04364b), 2024-01-01
Supplement: d4ra04364b2.xlsx [file d4ra04364b2.xlsx]

## Sheet: Sheet1
Dataset S10 - Raman parameters extracted from the deconvolution of the D- and G bands in spectra for fossil samples. D- and G frequency (i.e., the wavenumber defining the centre of a peak), D-FWHM (full width at half maximum height), G-FWHM, R1(ID/IG; I denotes intensity of the peak), Aratio (areaD/areaG), RBS (Raman Band Separation: Dfrequency-Gfrequency), wD/wG (where w denotes FWHM), D2-FWHM (…
Biota	species name	D frequency	G frequency	D FWHM	G FWHM	R1	Aratio	RBS	wD/wG	D2 FWHM	D4 FWHM	D6 FWHM
Bolca	Anatidae indet.	1360.81	1584	213.75	124.24	0.6375	1.08411	223.19	1.72046	61.9	NA	140.19
Bolca	Anatidae indet.	1364.66	1567	74.12	112.65	0.355263	0.235762	202.34	0.657967	69.31	NA	126.96
Bolca	Mene rhombea	1358.44	1608.71	99.37	71.2847	0.428571	0.59375	250.27	1.39399	NA	114.66	305.94
Bolca	Mene rhombea	1359.16	1604.73	77.9031	75.5615	0.00158	0.15	245.567	1.03099	NA	NA	290.35
Bolca	Mene rhombea	1357.39	1601.19	92.9528	77.0411	0.298246	0.369565	243.801	1.20653	NA	126.23	295.096
Bolca	Pelophylax pueyoi	1365	1604	86.55	76.5	0.2	0.236098	239	1.13137	10.74	NA	259.41
Libros	Pelophylax pueyoi	1368	1562	94.24	83.45	0.4375	0.5	194	1.1293	72.5	160.89	278.21
Libros	Pelophylax pueyoi	1361	1568	98.74	90.79	0.5	0.538462	207	1.08756	68.5	114.9	296.02
Libros	plant frag. indet.	1374.64	1597.21	157.043	98.3479	0.814286	1.30137	222.568	1.59681	NA	129.52	136.27
Libros	plant frag. indet.	1390.03	1598.79	242.34	90.4319	0.728571	1.95588	208.758	2.6798	NA	NA	406.04
Libros	plant frag. indet.	1356.6	1575.5	87.0725	73.8348	0.542857	0.62963	218.903	1.17929	61.18	101.22	311.34
Libros	plant frag. indet.	1386	1601	243.62	69.14	0.615385	2.21053	215	3.52358	NA	NA	29.99
Libros	plant frag. indet.	1373	1603	83.49	69.62	0.358974	0.433103	230	1.19922	209.69	NA	67.66
Libros	plant frag. indet.	1355	1596	287.12	68.03	1.25581	5.3871	241	4.22049	30.8	NA	73.56
Libros	plant frag. indet.	1347	1574	106.9	75.84	1.16129	1.64	227	1.40955	53.25	NA	191.2
Libros	plant frag. indet.	1362	1594	124.4	70.83	0.754098	1.32609	232	1.75632	32.28	276.7	234.8
