# Supplementary material for: A new non-destructive method to decipher the origin of organic matter in fossils using Raman spectroscopy
Source: Royal Society of Chemistry journal article supplement (doi:10.1039/d4ra04364b), 2024-01-01
Supplement: d4ra04364b3.xlsx [file d4ra04364b3.xlsx]

## Sheet: Sheet1
Dataset S11 - LDA loadings for the chemospace shown in Fig. 3. D- and G frequency (i.e., the wavenumber defining the centre of a peak), D-FWHM (full width at half maximum height), G-FWHM, R1(ID/IG; I denotes intensity of the peak), Aratio (areaD/areaG), RBS (Raman Band Separation: Dfrequency-Gfrequency), wD/wG (where w denotes FWHM), D2-FWHM (D2-full width at half maximum height), D4-FWHM (D4-ful…
Raman parameter	LD1	LD2	LD3	LD4
D frequency	-7.5952	2.5007	-0.9004	1.766
G frequency	7.5119	-2.3588	1.0076	-1.7446
D-FWHM	0.032337	0.059539	0.14954	-0.10066
G-FWHM	0.39266	-0.1448	-0.27884	0.22548
R1	-16.743	-2.4168	-2.2262	6.0974
Aratio	3.7043	2.1295	3.6898	-2.3275
RBS	-7.585	2.3481	-1.1334	1.8307
wD/wG	-5.9904	-7.7289	-16.318	10.229
D2-FWHM	-0.0459	-0.026193	-0.03409	0.025871
D4-FWHM	-0.0076008	-0.039447	-0.003432	-0.0010553
D6-FWHM	-0.016683	0.01362	-0.018973	0.012933
