# Supplementary material for: A new non-destructive method to decipher the origin of organic matter in fossils using Raman spectroscopy
Source: Royal Society of Chemistry journal article supplement (doi:10.1039/d4ra04364b), 2024-01-01
Supplement: d4ra04364b4.xlsx [file d4ra04364b4.xlsx]

## Sheet: Sheet1
Dataset S12 - List of secondary peaks derived from the deconvolution of the D and G bands in spectra for matured and fossil samples. FWHM = Full Width Half Maximum.
status	Kingdom	class	species name	common name	tissue/sample type	category	replicate	peak center	Area	peak max height	FWHM
Matured (250℃, 24h)	Animalia	Aves	Egretta garzetta	egret	white feather	amelanotic	1	1008.4	2.44793	0.03245	70.8684
Matured (250℃, 24h)	Animalia	Aves	Egretta garzetta	egret	white feather	amelanotic	1	1264.86	11.9912	0.13389	84.1372
Matured (250℃, 24h)	Animalia	Aves	Egretta garzetta	egret	white feather	amelanotic	1	1357.32	26.2498	0.24649	100.043
Matured (250℃, 24h)	Animalia	Aves	Egretta garzetta	egret	white feather	amelanotic	1	1453.75	179.434	0.49939	337.545
Matured (250℃, 24h)	Animalia	Aves	Egretta garzetta	egret	white feather	amelanotic	1	1550.3	38.725	0.40667	89.4585
Matured (250℃, 24h)	Animalia	Aves	Egretta garzetta	egret	white feather	amelanotic	1	1611.79	43.8608	0.51754	79.6155
Matured (250℃, 24h)	Animalia	Aves	Egretta garzetta	egret	white feather	amelanotic	1	1769.89	2.85388	0.0698	38.4117
Matured (250℃, 24h)	Animalia	Aves	Egretta garzetta	egret	white feather	amelanotic	2	1009.24	3.18174	0.0379	78.8724
Matured (250℃, 24h)	Animalia	Aves	Egretta garzetta	egret	white feather	amelanotic	2	1325.11	93.4702	0.48253	181.977
Matured (250℃, 24h)	Animalia	Aves	Egretta garzetta	egret	white feather	amelanotic	2	1364.29	8.01016	0.12013	62.6387
Matured (250℃, 24h)	Animalia	Aves	Egretta garzetta	egret	white feather	amelanotic	2	1422.44	29.1393	0.2573	106.392
Matured (250℃, 24h)	Animalia	Aves	Egretta garzetta	egret	white feather	amelanotic	2	1564.43	145.875	0.90672	151.139
Matured (250℃, 24h)	Animalia	Aves	Egretta garzetta	egret	white feather	amelanotic	2	1615.08	14.8361	0.2169	64.2572
Matured (250℃, 24h)	Animalia	Aves	Egretta garzetta	egret	white feather	amelanotic	2	1721.37	1.11547	0.03184	32.9109
Matured (250℃, 24h)	Animalia	Aves	Egretta garzetta	egret	white feather	amelanotic	2	1767.74	4.3491	0.09314	43.8668
Matured (250℃, 24h)	Animalia	Aves	Egretta garzetta	egret	white feather	amelanotic	3	1264	12.2468	0.14394	79.9324
Matured (250℃, 24h)	Animalia	Aves	Egretta garzetta	egret	white feather	amelanotic	3	1357.01	29.6332	0.27024	103.015
Matured (250℃, 24h)	Animalia	Aves	Egretta garzetta	egret	white feather	amelanotic	3	1444.88	153.469	0.4565	315.827
Matured (250℃, 24h)	Animalia	Aves	Egretta garzetta	egret	white feather	amelanotic	3	1555.03	51.0605	0.49693	96.5285
Matured (250℃, 24h)	Animalia	Aves	Egretta garzetta	egret	white feather	amelanotic	3	1614.35	40.7616	0.50116	76.4086
Matured (250℃, 24h)	Animalia	Aves	Egretta garzetta	egret	white feather	amelanotic	3	1766.07	2.65956	0.06867	36.3847
Matured (250℃, 24h)	Animalia	Aves	Egretta garzetta	egret	white feather	amelanotic	3	1786.11	0.20164	0.02072	9.14364
Matured (250℃, 24h)	Animalia	Aves	Corvus frugilegus	rook	black feather	melanin-rich	1	1063.78	13.2846	0.05972	208.99
Matured (250℃, 24h)	Animalia	Aves	Corvus frugilegus	rook	black feather	melanin-rich	1	1266.88	5.36085	0.0639	78.8174
Matured (250℃, 24h)	Animalia	Aves	Corvus frugilegus	rook	black feather	melanin-rich	1	1360.11	19.4064	0.18097	100.741
Matured (250℃, 24h)	Animalia	Aves	Corvus frugilegus	rook	black feather	melanin-rich	1	1393.45	229.061	0.66656	322.834
Matured (250℃, 24h)	Animalia	Aves	Corvus frugilegus	rook	black feather	melanin-rich	1	1578.14	98.2591	0.65384	141.178
Matured (250℃, 24h)	Animalia	Aves	Corvus frugilegus	rook	black feather	melanin-rich	1	1614.21	8.71775	0.12995	63.0237
Matured (250℃, 24h)	Animalia	Aves	Corvus frugilegus	rook	black feather	melanin-rich	1	1727.98	3.39082	0.04671	68.197
Matured (250℃, 24h)	Animalia	Aves	Corvus frugilegus	rook	black feather	melanin-rich	1	1767.55	2.37677	0.05899	37.8505
Matured (250℃, 24h)	Animalia	Aves	Corvus frugilegus	rook	black feather	melanin-rich	2	1039.4	12.1464	0.06617	172.454
Matured (250℃, 24h)	Animalia	Aves	Corvus frugilegus	rook	black feather	melanin-rich	2	1144.14	8.16617	0.08195	93.6099
Matured (250℃, 24h)	Animalia	Aves	Corvus frugilegus	rook	black feather	melanin-rich	2	1264.14	40.4297	0.30542	124.356
Matured (250℃, 24h)	Animalia	Aves	Corvus frugilegus	rook	black feather	melanin-rich	2	1360.94	40.4321	0.35637	106.585
Matured (250℃, 24h)	Animalia	Aves	Corvus frugilegus	rook	black feather	melanin-rich	2	1488.46	194.088	0.6149	296.526
Matured (250℃, 24h)	Animalia	Aves	Corvus frugilegus	rook	black feather	melanin-rich	2	1560.01	36.0226	0.35693	94.8123
Matured (250℃, 24h)	Animalia	Aves	Corvus frugilegus	rook	black feather	melanin-rich	2	1614.07	27.2757	0.35349	72.4881
Matured (250℃, 24h)	Animalia	Aves	Corvus frugilegus	rook	black feather	melanin-rich	2	1765.44	2.8474	0.06356	42.0849
Matured (250℃, 24h)	Animalia	Aves	Corvus frugilegus	rook	black feather	melanin-rich	3	1038.9	12.1074	0.0663	171.547
Matured (250℃, 24h)	Animalia	Aves	Corvus frugilegus	rook	black feather	melanin-rich	3	1149.38	10.6326	0.10012	99.7683
Matured (250℃, 24h)	Animalia	Aves	Corvus frugilegus	rook	black feather	melanin-rich	3	1253.4	35.3597	0.30002	110.72
Matured (250℃, 24h)	Animalia	Aves	Corvus frugilegus	rook	black feather	melanin-rich	3	1363.35	105.32	0.71343	138.683
Matured (250℃, 24h)	Animalia	Aves	Corvus frugilegus	rook	black feather	melanin-rich	3	1513.74	106.656	0.63944	156.695
Matured (250℃, 24h)	Animalia	Aves	Corvus frugilegus	rook	black feather	melanin-rich	3	1543.81	10.9451	0.15926	64.5632
Matured (250℃, 24h)	Animalia	Aves	Corvus frugilegus	rook	black feather	melanin-rich	3	1605.08	58.8756	0.62415	88.6157
Matured (250℃, 24h)	Animalia	Aves	Corvus frugilegus	rook	black feather	melanin-rich	3	1686.12	16.6145	0.11258	138.639
Matured (250℃, 24h)	Animalia	Aves	Corvus frugilegus	rook	black feather	melanin-rich	3	1766.72	2.22414	0.05593	37.3587
Matured (250℃, 24h)	Animalia	Malacostraca	Pandalus borealis	pink shrimp	shrimp cuticle	amelanotic	1	1100.18	13.0982	0.04523	272.062
Matured (250℃, 24h)	Animalia	Malacostraca	Pandalus borealis	pink shrimp	shrimp cuticle	amelanotic	1	1373.15	174.925	0.68447	240.084
Matured (250℃, 24h)	Animalia	Malacostraca	Pandalus borealis	pink shrimp	shrimp cuticle	amelanotic	1	1483.04	4.20288	0.07463	52.9085
Matured (250℃, 24h)	Animalia	Malacostraca	Pandalus borealis	pink shrimp	shrimp cuticle	amelanotic	1	1540.95	45.1443	0.51262	82.7317
Matured (250℃, 24h)	Animalia	Malacostraca	Pandalus borealis	pink shrimp	shrimp cuticle	amelanotic	1	1606.96	73.4715	0.79277	87.0638
Matured (250℃, 24h)	Animalia	Malacostraca	Pandalus borealis	pink shrimp	shrimp cuticle	amelanotic	1	1702.87	12.2852	0.10421	110.752
Matured (250℃, 24h)	Animalia	Malacostraca	Pandalus borealis	pink shrimp	shrimp cuticle	amelanotic	1	1771.26	2.07152	0.0524	37.1373
Matured (250℃, 24h)	Animalia	Malacostraca	Pandalus borealis	pink shrimp	shrimp cuticle	amelanotic	2	999.202	1.43466	0.02158	62.4609
Matured (250℃, 24h)	Animalia	Malacostraca	Pandalus borealis	pink shrimp	shrimp cuticle	amelanotic	2	1261.99	45.3038	0.13928	305.562
Matured (250℃, 24h)	Animalia	Malacostraca	Pandalus borealis	pink shrimp	shrimp cuticle	amelanotic	2	1261.99	15.5232	0.14689	99.28
Matured (250℃, 24h)	Animalia	Malacostraca	Pandalus borealis	pink shrimp	shrimp cuticle	amelanotic	2	1376.89	90.9209	0.5772	147.982
Matured (250℃, 24h)	Animalia	Malacostraca	Pandalus borealis	pink shrimp	shrimp cuticle	amelanotic	2	1480.31	23.7776	0.26395	84.6289
Matured (250℃, 24h)	Animalia	Malacostraca	Pandalus borealis	pink shrimp	shrimp cuticle	amelanotic	2	1543.84	52.984	0.59562	83.5692
Matured (250℃, 24h)	Animalia	Malacostraca	Pandalus borealis	pink shrimp	shrimp cuticle	amelanotic	2	1607.73	70.2173	0.77527	85.0862
Matured (250℃, 24h)	Animalia	Malacostraca	Pandalus borealis	pink shrimp	shrimp cuticle	amelanotic	2	1697.61	12.8872	0.1081	111.993
Matured (250℃, 24h)	Animalia	Malacostraca	Pandalus borealis	pink shrimp	shrimp cuticle	amelanotic	2	1770.54	2.1978	0.05527	37.3585
Matured (250℃, 24h)	Animalia	Malacostraca	Pandalus borealis	pink shrimp	shrimp cuticle	amelanotic	3	1004.11	0.91873	0.01769	48.7828
Matured (250℃, 24h)	Animalia	Malacostraca	Pandalus borealis	pink shrimp	shrimp cuticle	amelanotic	3	1268.78	22.9064	0.20316	105.92
Matured (250℃, 24h)	Animalia	Malacostraca	Pandalus borealis	pink shrimp	shrimp cuticle	amelanotic	3	1313.94	71.5191	0.15935	421.624
Matured (250℃, 24h)	Animalia	Malacostraca	Pandalus borealis	pink shrimp	shrimp cuticle	amelanotic	3	1363.68	45.2772	0.37665	112.93
Matured (250℃, 24h)	Animalia	Malacostraca	Pandalus borealis	pink shrimp	shrimp cuticle	amelanotic	3	1524.44	123.087	0.46337	249.547
Matured (250℃, 24h)	Animalia	Malacostraca	Pandalus borealis	pink shrimp	shrimp cuticle	amelanotic	3	1566.7	34.2137	0.35214	91.2742
Matured (250℃, 24h)	Animalia	Malacostraca	Pandalus borealis	pink shrimp	shrimp cuticle	amelanotic	3	1616.19	24.4891	0.34716	66.2696
Matured (250℃, 24h)	Animalia	Malacostraca	Pandalus borealis	pink shrimp	shrimp cuticle	amelanotic	3	1766.24	2.15306	0.04881	41.4435
Matured (250℃, 24h)	Plantae	Trebouxiophyceae	Chlorella sp	green algae	algal film	amelanotic	1	1295.79	93.5144	0.21478	409.027
Matured (250℃, 24h)	Plantae	Trebouxiophyceae	Chlorella sp	green algae	algal film	amelanotic	1	1295.82	38.4438	0.27359	132.007
Matured (250℃, 24h)	Plantae	Trebouxiophyceae	Chlorella sp	green algae	algal film	amelanotic	1	1368.43	22.8162	0.25065	85.5147
Matured (250℃, 24h)	Plantae	Trebouxiophyceae	Chlorella sp	green algae	algal film	amelanotic	1	1454.16	75.1751	0.41559	169.932
Matured (250℃, 24h)	Plantae	Trebouxiophyceae	Chlorella sp	green algae	algal film	amelanotic	1	1557.96	53.6319	0.52123	96.6626
Matured (250℃, 24h)	Plantae	Trebouxiophyceae	Chlorella sp	green algae	algal film	amelanotic	1	1611.5	38.6194	0.5	72.5608
Matured (250℃, 24h)	Plantae	Trebouxiophyceae	Chlorella sp	green algae	algal film	amelanotic	1	1669.1	20.152	0.14616	129.525
Matured (250℃, 24h)	Plantae	Trebouxiophyceae	Chlorella sp	green algae	algal film	amelanotic	1	1763.15	2.561	0.06207	38.7618
Matured (250℃, 24h)	Plantae	Trebouxiophyceae	Chlorella sp	green algae	algal film	amelanotic	2	1261.85	64.5196	0.15787	383.925
Matured (250℃, 24h)	Plantae	Trebouxiophyceae	Chlorella sp	green algae	algal film	amelanotic	2	1378.51	145.277	0.63587	214.633
Matured (250℃, 24h)	Plantae	Trebouxiophyceae	Chlorella sp	green algae	algal film	amelanotic	2	1481.88	5.12773	0.0897	53.7012
Matured (250℃, 24h)	Plantae	Trebouxiophyceae	Chlorella sp	green algae	algal film	amelanotic	2	1541.77	47.1593	0.53488	82.8283
Matured (250℃, 24h)	Plantae	Trebouxiophyceae	Chlorella sp	green algae	algal film	amelanotic	2	1605.86	64.3287	0.75671	79.8628
Matured (250℃, 24h)	Plantae	Trebouxiophyceae	Chlorella sp	green algae	algal film	amelanotic	2	1680.48	19.0662	0.13914	128.727
Matured (250℃, 24h)	Plantae	Trebouxiophyceae	Chlorella sp	green algae	algal film	amelanotic	2	1766.1	2.4035	0.06092	37.0621
Matured (250℃, 24h)	Plantae	Trebouxiophyceae	Chlorella sp	green algae	algal film	amelanotic	3	1278.29	74.7803	0.18933	371.048
Matured (250℃, 24h)	Plantae	Trebouxiophyceae	Chlorella sp	green algae	algal film	amelanotic	3	1278.29	29.6696	0.24406	114.206
Matured (250℃, 24h)	Plantae	Trebouxiophyceae	Chlorella sp	green algae	algal film	amelanotic	3	1365.69	43.5672	0.398	102.837
Matured (250℃, 24h)	Plantae	Trebouxiophyceae	Chlorella sp	green algae	algal film	amelanotic	3	1491.05	113.123	0.49829	213.275
Matured (250℃, 24h)	Plantae	Trebouxiophyceae	Chlorella sp	green algae	algal film	amelanotic	3	1549.91	25.4291	0.2981	80.1369
Matured (250℃, 24h)	Plantae	Trebouxiophyceae	Chlorella sp	green algae	algal film	amelanotic	3	1609.11	51.5984	0.61917	78.2879
Matured (250℃, 24h)	Plantae	Trebouxiophyceae	Chlorella sp	green algae	algal film	amelanotic	3	1696.5	9.23522	0.09091	95.435
Matured (250℃, 24h)	Plantae	Trebouxiophyceae	Chlorella sp	green algae	algal film	amelanotic	3	1764.91	3.09772	0.07413	39.2547
Matured (250℃, 24h)	Fungi	Agaricomycetes	Auricularia auricola	Judas's ear	melanotic fungus	melanin-rich	1	1014.86	1.44167	0.02599	52.1144
Matured (250℃, 24h)	Fungi	Agaricomycetes	Auricularia auricola	Judas's ear	melanotic fungus	melanin-rich	1	1277.77	42.5754	0.11222	356.403
Matured (250℃, 24h)	Fungi	Agaricomycetes	Auricularia auricola	Judas's ear	melanotic fungus	melanin-rich	1	1277.86	31.2355	0.26674	110.011
Matured (250℃, 24h)	Fungi	Agaricomycetes	Auricularia auricola	Judas's ear	melanotic fungus	melanin-rich	1	1368.29	51.5648	0.46654	103.832
Matured (250℃, 24h)	Fungi	Agaricomycetes	Auricularia auricola	Judas's ear	melanotic fungus	melanin-rich	1	1463.9	51.8934	0.30928	157.628
Matured (250℃, 24h)	Fungi	Agaricomycetes	Auricularia auricola	Judas's ear	melanotic fungus	melanin-rich	1	1563.08	29.767	0.34602	80.8167
Matured (250℃, 24h)	Fungi	Agaricomycetes	Auricularia auricola	Judas's ear	melanotic fungus	melanin-rich	1	1576.51	65.14	0.3109	196.829
Matured (250℃, 24h)	Fungi	Agaricomycetes	Auricularia auricola	Judas's ear	melanotic fungus	melanin-rich	1	1611.43	32.8429	0.46371	66.5367
Matured (250℃, 24h)	Fungi	Agaricomycetes	Auricularia auricola	Judas's ear	melanotic fungus	melanin-rich	1	1761	1.70261	0.03717	43.0354
Matured (250℃, 24h)	Fungi	Agaricomycetes	Auricularia auricola	Judas's ear	melanotic fungus	melanin-rich	2	1014.83	1.09331	0.01959	52.4283
Matured (250℃, 24h)	Fungi	Agaricomycetes	Auricularia auricola	Judas's ear	melanotic fungus	melanin-rich	2	1249.58	42.1292	0.13662	289.685
Matured (250℃, 24h)	Fungi	Agaricomycetes	Auricularia auricola	Judas's ear	melanotic fungus	melanin-rich	2	1263.81	17.8974	0.17389	96.6884
Matured (250℃, 24h)	Fungi	Agaricomycetes	Auricularia auricola	Judas's ear	melanotic fungus	melanin-rich	2	1375.08	90.8722	0.63107	135.277
Matured (250℃, 24h)	Fungi	Agaricomycetes	Auricularia auricola	Judas's ear	melanotic fungus	melanin-rich	2	1486.48	35.9911	0.35646	94.8546
Matured (250℃, 24h)	Fungi	Agaricomycetes	Auricularia auricola	Judas's ear	melanotic fungus	melanin-rich	2	1528.24	13.1669	0.21888	56.5126
Matured (250℃, 24h)	Fungi	Agaricomycetes	Auricularia auricola	Judas's ear	melanotic fungus	melanin-rich	2	1553.52	2.82025	0.07522	35.2223
Matured (250℃, 24h)	Fungi	Agaricomycetes	Auricularia auricola	Judas's ear	melanotic fungus	melanin-rich	2	1596.48	92.0138	0.94788	91.1947
Matured (250℃, 24h)	Fungi	Agaricomycetes	Auricularia auricola	Judas's ear	melanotic fungus	melanin-rich	2	1712.87	12.5351	0.09229	127.59
Matured (250℃, 24h)	Fungi	Agaricomycetes	Auricularia auricola	Judas's ear	melanotic fungus	melanin-rich	3	1016.76	1.24703	0.0208	56.3269
Matured (250℃, 24h)	Fungi	Agaricomycetes	Auricularia auricola	Judas's ear	melanotic fungus	melanin-rich	3	1293.36	40.3216	0.10533	359.621
Matured (250℃, 24h)	Fungi	Agaricomycetes	Auricularia auricola	Judas's ear	melanotic fungus	melanin-rich	3	1293.36	39.7501	0.27624	135.181
Matured (250℃, 24h)	Fungi	Agaricomycetes	Auricularia auricola	Judas's ear	melanotic fungus	melanin-rich	3	1387.6	57.4266	0.49542	108.894
Matured (250℃, 24h)	Fungi	Agaricomycetes	Auricularia auricola	Judas's ear	melanotic fungus	melanin-rich	3	1449.3	8.43738	0.13754	57.6302
Matured (250℃, 24h)	Fungi	Agaricomycetes	Auricularia auricola	Judas's ear	melanotic fungus	melanin-rich	3	1503.32	31.4267	0.3786	77.9798
Matured (250℃, 24h)	Fungi	Agaricomycetes	Auricularia auricola	Judas's ear	melanotic fungus	melanin-rich	3	1548.59	18.3905	0.28971	59.6336
Matured (250℃, 24h)	Fungi	Agaricomycetes	Auricularia auricola	Judas's ear	melanotic fungus	melanin-rich	3	1601.15	77.9194	0.8937	81.9073
Matured (250℃, 24h)	Fungi	Agaricomycetes	Auricularia auricola	Judas's ear	melanotic fungus	melanin-rich	3	1697.6	12.9012	0.08838	137.141
Matured (250℃, 24h)	Plantae	Ginkgoopsida	Gingko biloba	Gingko	leaf	amelanotic	1	1326.95	71.579	0.36106	186.242
Matured (250℃, 24h)	Plantae	Ginkgoopsida	Gingko biloba	Gingko	leaf	amelanotic	1	1377.66	15.4401	0.20662	70.1995
Matured (250℃, 24h)	Plantae	Ginkgoopsida	Gingko biloba	Gingko	leaf	amelanotic	1	1427.6	19.068	0.2115	84.6971
Matured (250℃, 24h)	Plantae	Ginkgoopsida	Gingko biloba	Gingko	leaf	amelanotic	1	1560.87	74.9771	0.48455	145.364
Matured (250℃, 24h)	Plantae	Ginkgoopsida	Gingko biloba	Gingko	leaf	amelanotic	1	1577.77	17.0619	0.27001	59.3636
Matured (250℃, 24h)	Plantae	Ginkgoopsida	Gingko biloba	Gingko	leaf	amelanotic	1	1606.6	0.72391	0.02678	25.3966
Matured (250℃, 24h)	Plantae	Ginkgoopsida	Gingko biloba	Gingko	leaf	amelanotic	1	1616.14	31.0276	0.48191	60.4849
Matured (250℃, 24h)	Plantae	Ginkgoopsida	Gingko biloba	Gingko	leaf	amelanotic	1	1728.93	6.15089	0.04823	119.81
Matured (250℃, 24h)	Plantae	Ginkgoopsida	Gingko biloba	Gingko	leaf	amelanotic	2	1293.89	41.3087	0.308	125.995
Matured (250℃, 24h)	Plantae	Ginkgoopsida	Gingko biloba	Gingko	leaf	amelanotic	2	1384.01	44.7151	0.47508	88.4207
Matured (250℃, 24h)	Plantae	Ginkgoopsida	Gingko biloba	Gingko	leaf	amelanotic	2	1457.34	26.3071	0.27269	90.6308
Matured (250℃, 24h)	Plantae	Ginkgoopsida	Gingko biloba	Gingko	leaf	amelanotic	2	1521.47	14.4211	0.2432	55.7067
Matured (250℃, 24h)	Plantae	Ginkgoopsida	Gingko biloba	Gingko	leaf	amelanotic	2	1555.01	2.71358	0.07547	33.7771
Matured (250℃, 24h)	Plantae	Ginkgoopsida	Gingko biloba	Gingko	leaf	amelanotic	2	1599.64	93.389	0.99973	87.7568
Matured (250℃, 24h)	Plantae	Ginkgoopsida	Gingko biloba	Gingko	leaf	amelanotic	3	1127.69	5.27224	0.03946	125.528
Matured (250℃, 24h)	Plantae	Ginkgoopsida	Gingko biloba	Gingko	leaf	amelanotic	3	1280.7	35.2237	0.2851	116.066
Matured (250℃, 24h)	Plantae	Ginkgoopsida	Gingko biloba	Gingko	leaf	amelanotic	3	1385.02	58.2674	0.51842	105.588
Matured (250℃, 24h)	Plantae	Ginkgoopsida	Gingko biloba	Gingko	leaf	amelanotic	3	1446.09	1.05166	0.0389	25.3957
Matured (250℃, 24h)	Plantae	Ginkgoopsida	Gingko biloba	Gingko	leaf	amelanotic	3	1551.18	83.6235	0.42854	183.318
Matured (250℃, 24h)	Plantae	Ginkgoopsida	Gingko biloba	Gingko	leaf	amelanotic	3	1584.49	29.6181	0.40056	69.4643
Matured (250℃, 24h)	Plantae	Ginkgoopsida	Gingko biloba	Gingko	leaf	amelanotic	3	1618.57	23.9026	0.3919	57.2979
Matured (250℃, 24h)	Plantae	Ginkgoopsida	Gingko biloba	Gingko	leaf	amelanotic	3	1756.64	4.92886	0.04503	102.836
Matured (250℃, 24h)	Monera	Cyanophyceae	Nostoc punctiforme	cyanobacteria	cyanobacterial film	amelanotic	1	1253.79	12.4404	0.14731	79.3372
Matured (250℃, 24h)	Monera	Cyanophyceae	Nostoc punctiforme	cyanobacteria	cyanobacterial film	amelanotic	1	1373.07	57.6489	0.38267	141.527
Matured (250℃, 24h)	Monera	Cyanophyceae	Nostoc punctiforme	cyanobacteria	cyanobacterial film	amelanotic	1	1552.2	106.981	0.70608	142.338
Matured (250℃, 24h)	Monera	Cyanophyceae	Nostoc punctiforme	cyanobacteria	cyanobacterial film	amelanotic	1	1615.1	15.0331	0.22787	61.9755
Matured (250℃, 24h)	Monera	Cyanophyceae	Nostoc punctiforme	cyanobacteria	cyanobacterial film	amelanotic	1	1656.36	0.65414	0.04222	14.5566
Matured (250℃, 24h)	Monera	Cyanophyceae	Nostoc punctiforme	cyanobacteria	cyanobacterial film	amelanotic	2	1312.53	61.0195	0.34049	168.355
Matured (250℃, 24h)	Monera	Cyanophyceae	Nostoc punctiforme	cyanobacteria	cyanobacterial film	amelanotic	2	1380.01	24.7956	0.25087	92.8514
Matured (250℃, 24h)	Monera	Cyanophyceae	Nostoc punctiforme	cyanobacteria	cyanobacterial film	amelanotic	2	1495.54	59.8645	0.36804	152.805
Matured (250℃, 24h)	Monera	Cyanophyceae	Nostoc punctiforme	cyanobacteria	cyanobacterial film	amelanotic	2	1541.62	14.5477	0.20175	67.7414
Matured (250℃, 24h)	Monera	Cyanophyceae	Nostoc punctiforme	cyanobacteria	cyanobacterial film	amelanotic	2	1605.81	64.8932	0.6882	88.5839
Matured (250℃, 24h)	Monera	Cyanophyceae	Nostoc punctiforme	cyanobacteria	cyanobacterial film	amelanotic	2	1709.53	2.90548	0.03997	68.2828
Matured (250℃, 24h)	Monera	Cyanophyceae	Nostoc punctiforme	cyanobacteria	cyanobacterial film	amelanotic	3	1249.94	2.57106	0.04871	49.583
Matured (250℃, 24h)	Monera	Cyanophyceae	Nostoc punctiforme	cyanobacteria	cyanobacterial film	amelanotic	3	1387.53	54.5211	0.2437	210.174
Matured (250℃, 24h)	Monera	Cyanophyceae	Nostoc punctiforme	cyanobacteria	cyanobacterial film	amelanotic	3	1532.42	28.1277	0.29503	89.5659
Matured (250℃, 24h)	Monera	Cyanophyceae	Nostoc punctiforme	cyanobacteria	cyanobacterial film	amelanotic	3	1605.47	34.717	0.36398	89.6059
Matured (250℃, 24h)	Animalia	Insecta	Harmonia axyridis	ladybird	insect cuticle (red)	amelanotic	1	1242.41	2.09398	0.03723	52.8396
Matured (250℃, 24h)	Animalia	Insecta	Harmonia axyridis	ladybird	insect cuticle (red)	amelanotic	1	1376.3	152.615	0.64627	221.846
Matured (250℃, 24h)	Animalia	Insecta	Harmonia axyridis	ladybird	insect cuticle (red)	amelanotic	1	1508.1	11.2928	0.12648	83.8813
Matured (250℃, 24h)	Animalia	Insecta	Harmonia axyridis	ladybird	insect cuticle (red)	amelanotic	1	1586.51	117	0.88275	124.513
Matured (250℃, 24h)	Animalia	Insecta	Harmonia axyridis	ladybird	insect cuticle (red)	amelanotic	1	1617.84	6.71995	0.13488	46.8031
Matured (250℃, 24h)	Animalia	Insecta	Harmonia axyridis	ladybird	insect cuticle (red)	amelanotic	1	1724.8	7.91315	0.09284	80.0723
Matured (250℃, 24h)	Animalia	Insecta	Harmonia axyridis	ladybird	insect cuticle (red)	amelanotic	1	1772.21	2.93321	0.06622	41.6101
Matured (250℃, 24h)	Animalia	Insecta	Harmonia axyridis	ladybird	insect cuticle (red)	amelanotic	2	1335.03	97.1677	0.47334	192.847
Matured (250℃, 24h)	Animalia	Insecta	Harmonia axyridis	ladybird	insect cuticle (red)	amelanotic	2	1376.87	12.2969	0.15219	75.9079
Matured (250℃, 24h)	Animalia	Insecta	Harmonia axyridis	ladybird	insect cuticle (red)	amelanotic	2	1471.24	46.3928	0.34049	128.002
Matured (250℃, 24h)	Animalia	Insecta	Harmonia axyridis	ladybird	insect cuticle (red)	amelanotic	2	1555.99	60.9354	0.63398	90.2948
Matured (250℃, 24h)	Animalia	Insecta	Harmonia axyridis	ladybird	insect cuticle (red)	amelanotic	2	1614.1	54.2559	0.68517	74.3898
Matured (250℃, 24h)	Animalia	Insecta	Harmonia axyridis	ladybird	insect cuticle (red)	amelanotic	2	1691.12	17.2729	0.14215	114.153
Matured (250℃, 24h)	Animalia	Insecta	Harmonia axyridis	ladybird	insect cuticle (red)	amelanotic	2	1772.08	2.83471	0.06183	43.0689
Matured (250℃, 24h)	Animalia	Insecta	Harmonia axyridis	ladybird	insect cuticle (red)	amelanotic	3	1273.99	16.4121	0.14561	105.884
Matured (250℃, 24h)	Animalia	Insecta	Harmonia axyridis	ladybird	insect cuticle (red)	amelanotic	3	1365.67	23.1142	0.2261	96.0373
Matured (250℃, 24h)	Animalia	Insecta	Harmonia axyridis	ladybird	insect cuticle (red)	amelanotic	3	1442.14	153.615	0.48276	298.934
Matured (250℃, 24h)	Animalia	Insecta	Harmonia axyridis	ladybird	insect cuticle (red)	amelanotic	3	1587.63	85.469	0.65123	123.294
Matured (250℃, 24h)	Animalia	Insecta	Harmonia axyridis	ladybird	insect cuticle (red)	amelanotic	3	1616.33	9.35193	0.17096	51.3902
Matured (250℃, 24h)	Animalia	Insecta	Harmonia axyridis	ladybird	insect cuticle (red)	amelanotic	3	1735.14	5.48594	0.07112	72.4618
Matured (250℃, 24h)	Animalia	Insecta	Harmonia axyridis	ladybird	insect cuticle (red)	amelanotic	3	1775.69	1.54871	0.04798	30.3245
Matured (250℃, 24h)	Animalia	Insecta	Harmonia axyridis	ladybird	insect cuticle (black)	melanin-rich	1	1346.12	115.66	0.5379	202
Matured (250℃, 24h)	Animalia	Insecta	Harmonia axyridis	ladybird	insect cuticle (black)	melanin-rich	1	1372.52	8.14885	0.10806	70.8431
Matured (250℃, 24h)	Animalia	Insecta	Harmonia axyridis	ladybird	insect cuticle (black)	melanin-rich	1	1451.35	23.4433	0.18681	117.892
Matured (250℃, 24h)	Animalia	Insecta	Harmonia axyridis	ladybird	insect cuticle (black)	melanin-rich	1	1576.47	139.003	0.90125	144.893
Matured (250℃, 24h)	Animalia	Insecta	Harmonia axyridis	ladybird	insect cuticle (black)	melanin-rich	1	1614.96	10.4323	0.17623	55.6114
Matured (250℃, 24h)	Animalia	Insecta	Harmonia axyridis	ladybird	insect cuticle (black)	melanin-rich	1	1733.62	6.41139	0.07952	75.7467
Matured (250℃, 24h)	Animalia	Insecta	Harmonia axyridis	ladybird	insect cuticle (black)	melanin-rich	1	1773.15	2.34111	0.05706	38.5474
Matured (250℃, 24h)	Animalia	Insecta	Harmonia axyridis	ladybird	insect cuticle (black)	melanin-rich	2	1242.95	1.9027	0.03387	52.7811
Matured (250℃, 24h)	Animalia	Insecta	Harmonia axyridis	ladybird	insect cuticle (black)	melanin-rich	2	1373.93	150.066	0.65458	215.369
Matured (250℃, 24h)	Animalia	Insecta	Harmonia axyridis	ladybird	insect cuticle (black)	melanin-rich	2	1504.4	10.5281	0.11733	84.2981
Matured (250℃, 24h)	Animalia	Insecta	Harmonia axyridis	ladybird	insect cuticle (black)	melanin-rich	2	1585.01	119.644	0.88158	127.497
Matured (250℃, 24h)	Animalia	Insecta	Harmonia axyridis	ladybird	insect cuticle (black)	melanin-rich	2	1616.67	7.13283	0.13357	50.1666
Matured (250℃, 24h)	Animalia	Insecta	Harmonia axyridis	ladybird	insect cuticle (black)	melanin-rich	2	1729.07	6.6025	0.07795	79.5671
Matured (250℃, 24h)	Animalia	Insecta	Harmonia axyridis	ladybird	insect cuticle (black)	melanin-rich	2	1773.08	2.17669	0.05256	38.9044
Matured (250℃, 24h)	Animalia	Insecta	Harmonia axyridis	ladybird	insect cuticle (black)	melanin-rich	3	1336.05	103.395	0.49649	195.638
Matured (250℃, 24h)	Animalia	Insecta	Harmonia axyridis	ladybird	insect cuticle (black)	melanin-rich	3	1374.76	11.1962	0.14174	74.2045
Matured (250℃, 24h)	Animalia	Insecta	Harmonia axyridis	ladybird	insect cuticle (black)	melanin-rich	3	1476.04	50.486	0.35126	135.024
Matured (250℃, 24h)	Animalia	Insecta	Harmonia axyridis	ladybird	insect cuticle (black)	melanin-rich	3	1554.85	57.2246	0.60323	89.1183
Matured (250℃, 24h)	Animalia	Insecta	Harmonia axyridis	ladybird	insect cuticle (black)	melanin-rich	3	1612.97	55.3593	0.69049	75.3185
Matured (250℃, 24h)	Animalia	Insecta	Harmonia axyridis	ladybird	insect cuticle (black)	melanin-rich	3	1688.84	16.9517	0.14267	111.624
Matured (250℃, 24h)	Animalia	Insecta	Harmonia axyridis	ladybird	insect cuticle (black)	melanin-rich	3	1770.11	3.06349	0.06335	45.4274
Fossil (10 Ma; Libros, SP)	Animalia	Aves	Anatidae indet.	NA	melanosome film (feather)	melanin-rich	1	1360.82	6.71686	0.08591	73.4539
Fossil (10 Ma; Libros, SP)	Animalia	Aves	Anatidae indet.	NA	melanosome film (feather)	melanin-rich	1	1360.82	116.968	0.51407	213.754
Fossil (10 Ma; Libros, SP)	Animalia	Aves	Anatidae indet.	NA	melanosome film (feather)	melanin-rich	1	1479.61	43.9509	0.29451	140.198
Fossil (10 Ma; Libros, SP)	Animalia	Aves	Anatidae indet.	NA	melanosome film (feather)	melanin-rich	1	1584.59	107.001	0.80904	124.247
Fossil (10 Ma; Libros, SP)	Animalia	Aves	Anatidae indet.	NA	melanosome film (feather)	melanin-rich	1	1612.42	10.6688	0.1619	61.9052
Fossil (10 Ma; Libros, SP)	Animalia	Aves	Anatidae indet.	NA	melanosome film (feather)	melanin-rich	1	1729.95	9.43228	0.08267	107.191
Fossil (10 Ma; Libros, SP)	Animalia	Aves	Anatidae indet.	NA	melanosome film (feather)	melanin-rich	2	1299.9	60.009	0.35486	158.866
Fossil (10 Ma; Libros, SP)	Animalia	Aves	Anatidae indet.	NA	melanosome film (feather)	melanin-rich	2	1314.45	1.08137	0.03093	32.8403
Fossil (10 Ma; Libros, SP)	Animalia	Aves	Anatidae indet.	NA	melanosome film (feather)	melanin-rich	2	1364.66	21.6517	0.2744	74.1281
Fossil (10 Ma; Libros, SP)	Animalia	Aves	Anatidae indet.	NA	melanosome film (feather)	melanin-rich	2	1450.79	89.8537	0.66486	126.962
Fossil (10 Ma; Libros, SP)	Animalia	Aves	Anatidae indet.	NA	melanosome film (feather)	melanin-rich	2	1567.91	91.8531	0.76598	112.654
Fossil (10 Ma; Libros, SP)	Animalia	Aves	Anatidae indet.	NA	melanosome film (feather)	melanin-rich	2	1617.93	31.4331	0.42602	69.3144
Fossil (10 Ma; Libros, SP)	Animalia	Aves	Anatidae indet.	NA	melanosome film (feather)	melanin-rich	2	1672.62	3.96622	0.07311	50.9648
Fossil (10 Ma; Libros, SP)	Animalia	Aves	Anatidae indet.	NA	melanosome film (feather)	melanin-rich	2	1721.02	13.734	0.11702	110.259
Fossil (10 Ma; Libros, SP)	Plantae	NA	NA	NA	plant fragment	amelanotic	4	1380.1	4.98112	0.07263	64.4272
Fossil (10 Ma; Libros, SP)	Plantae	NA	NA	NA	plant fragment	amelanotic	4	1386.14	126.124	0.48635	243.622
Fossil (10 Ma; Libros, SP)	Plantae	NA	NA	NA	plant fragment	amelanotic	4	1503.58	1.2311	0.03856	29.9951
Fossil (10 Ma; Libros, SP)	Plantae	NA	NA	NA	plant fragment	amelanotic	4	1541.49	10.6329	0.19985	49.9816
Fossil (10 Ma; Libros, SP)	Plantae	NA	NA	NA	plant fragment	amelanotic	4	1570.14	3.68989	0.10259	33.7904
Fossil (10 Ma; Libros, SP)	Plantae	NA	NA	NA	plant fragment	amelanotic	4	1601.15	57.4254	0.78023	69.1429
Fossil (10 Ma; Libros, SP)	Plantae	NA	NA	NA	plant fragment	amelanotic	4	1601.15	30.4379	0.13928	205.307
Fossil (10 Ma; Libros, SP)	Plantae	NA	NA	NA	plant fragment	amelanotic	5	1300.03	54.2652	0.32566	156.539
Fossil (10 Ma; Libros, SP)	Plantae	NA	NA	NA	plant fragment	amelanotic	5	1310.38	0.60898	0.01528	37.4472
Fossil (10 Ma; Libros, SP)	Plantae	NA	NA	NA	plant fragment	amelanotic	5	1373.6	25.1222	0.28264	83.4996
Fossil (10 Ma; Libros, SP)	Plantae	NA	NA	NA	plant fragment	amelanotic	5	1448.67	62.0506	0.45547	127.985
Fossil (10 Ma; Libros, SP)	Plantae	NA	NA	NA	plant fragment	amelanotic	5	1535.05	19.9221	0.27661	67.6606
Fossil (10 Ma; Libros, SP)	Plantae	NA	NA	NA	plant fragment	amelanotic	5	1566.06	6.57358	0.1505	41.0323
Fossil (10 Ma; Libros, SP)	Plantae	NA	NA	NA	plant fragment	amelanotic	5	1603.44	58.002	0.78258	69.6277
Fossil (10 Ma; Libros, SP)	Plantae	NA	NA	NA	plant fragment	amelanotic	5	1632.36	38.5212	0.17257	209.699
Fossil (49 Ma; Bolca, IT)	Animalia	Actinopterygii	Mene rhombea	moonfish	melanosome film (abdomen)	melanin-rich	1	1270.38	12.3165	0.10091	114.665
Fossil (49 Ma; Bolca, IT)	Animalia	Actinopterygii	Mene rhombea	moonfish	melanosome film (abdomen)	melanin-rich	1	1358.44	19.4316	0.18371	99.37
Fossil (49 Ma; Bolca, IT)	Animalia	Actinopterygii	Mene rhombea	moonfish	melanosome film (abdomen)	melanin-rich	1	1462.38	168.604	0.51773	305.94
Fossil (49 Ma; Bolca, IT)	Animalia	Actinopterygii	Mene rhombea	moonfish	melanosome film (abdomen)	melanin-rich	1	1563.05	39.6704	0.41847	89.0581
Fossil (49 Ma; Bolca, IT)	Animalia	Actinopterygii	Mene rhombea	moonfish	melanosome film (abdomen)	melanin-rich	1	1608.71	32.5257	0.42865	71.2847
Fossil (49 Ma; Bolca, IT)	Animalia	Actinopterygii	Mene rhombea	moonfish	melanosome film (abdomen)	melanin-rich	1	1316.95	37.7253	0.2037	173.984
Fossil (49 Ma; Bolca, IT)	Animalia	Actinopterygii	Mene rhombea	moonfish	melanosome film (abdomen)	melanin-rich	1	1359.16	6.61067	0.07972	77.9031
Fossil (49 Ma; Bolca, IT)	Animalia	Actinopterygii	Mene rhombea	moonfish	melanosome film (abdomen)	melanin-rich	1	1459.62	159.294	0.51539	290.355
Fossil (49 Ma; Bolca, IT)	Animalia	Actinopterygii	Mene rhombea	moonfish	melanosome film (abdomen)	melanin-rich	1	1554.75	35.1756	0.37771	87.4881
Fossil (49 Ma; Bolca, IT)	Animalia	Actinopterygii	Mene rhombea	moonfish	melanosome film (abdomen)	melanin-rich	1	1604.73	40.7225	0.50629	75.5615
Fossil (49 Ma; Bolca, IT)	Animalia	Actinopterygii	Mene rhombea	moonfish	melanosome film (abdomen)	melanin-rich	1	1281.86	17.2221	0.12817	126.234
Fossil (49 Ma; Bolca, IT)	Animalia	Actinopterygii	Mene rhombea	moonfish	melanosome film (abdomen)	melanin-rich	1	1357.39	17.4602	0.17646	92.9528
Fossil (49 Ma; Bolca, IT)	Animalia	Actinopterygii	Mene rhombea	moonfish	melanosome film (abdomen)	melanin-rich	1	1456.3	178.906	0.56787	295.966
Fossil (49 Ma; Bolca, IT)	Animalia	Actinopterygii	Mene rhombea	moonfish	melanosome film (abdomen)	melanin-rich	1	1547.68	25.495	0.30702	78.012
Fossil (49 Ma; Bolca, IT)	Animalia	Actinopterygii	Mene rhombea	moonfish	melanosome film (abdomen)	melanin-rich	1	1601.19	46.7471	0.57003	77.0411
Fossil (49 Ma; Bolca, IT)	Plantae	NA	NA	NA	plant fragment	amelanotic	1	1004.01	7.12265	0.04978	134.406
Fossil (49 Ma; Bolca, IT)	Plantae	NA	NA	NA	plant fragment	amelanotic	1	1248.23	23.4783	0.17028	129.527
Fossil (49 Ma; Bolca, IT)	Plantae	NA	NA	NA	plant fragment	amelanotic	1	1374.64	95.5251	0.57143	157.043
Fossil (49 Ma; Bolca, IT)	Plantae	NA	NA	NA	plant fragment	amelanotic	1	1513.48	68.9935	0.4756	136.28
Fossil (49 Ma; Bolca, IT)	Plantae	NA	NA	NA	plant fragment	amelanotic	1	1597.21	73.2842	0.70002	98.3479
Fossil (49 Ma; Bolca, IT)	Plantae	NA	NA	NA	plant fragment	amelanotic	1	1597.21	37.336	0.10212	343.475
Fossil (49 Ma; Bolca, IT)	Plantae	NA	NA	NA	plant fragment	amelanotic	1	1390.03	133.617	0.51797	242.34
Fossil (49 Ma; Bolca, IT)	Plantae	NA	NA	NA	plant fragment	amelanotic	1	1524.57	50.425	0.11666	406.048
Fossil (49 Ma; Bolca, IT)	Plantae	NA	NA	NA	plant fragment	amelanotic	1	1536.71	30.0587	0.29221	96.6372
Fossil (49 Ma; Bolca, IT)	Plantae	NA	NA	NA	plant fragment	amelanotic	1	1598.79	68.1821	0.7083	90.4319
Fossil (49 Ma; Bolca, IT)	Plantae	NA	NA	NA	plant fragment	amelanotic	1	1260.06	15.0407	0.13959	101.224
Fossil (49 Ma; Bolca, IT)	Plantae	NA	NA	NA	plant fragment	amelanotic	1	1356.6	17.7545	0.19156	87.0725
Fossil (49 Ma; Bolca, IT)	Plantae	NA	NA	NA	plant fragment	amelanotic	1	1477.43	232.186	0.70059	311.344
Fossil (49 Ma; Bolca, IT)	Plantae	NA	NA	NA	plant fragment	amelanotic	1	1575.5	27.9428	0.35553	73.8348
Fossil (49 Ma; Bolca, IT)	Plantae	NA	NA	NA	plant fragment	amelanotic	1	1616.76	18.9717	0.2913	61.1842
Fossil (10 Ma; Libros, SP)	Animalia	Aura	Pelophylax pueyoi	NA	melanosome film (abdomen)	melanin-rich	1	1317.98	52.313	0.26198	187.59
Fossil (10 Ma; Libros, SP)	Animalia	Aura	Pelophylax pueyoi	NA	melanosome film (abdomen)	melanin-rich	1	1365.94	9.68426	0.10511	86.5537
Fossil (10 Ma; Libros, SP)	Animalia	Aura	Pelophylax pueyoi	NA	melanosome film (abdomen)	melanin-rich	1	1494.24	141.336	0.51184	259.412
Fossil (10 Ma; Libros, SP)	Animalia	Aura	Pelophylax pueyoi	NA	melanosome film (abdomen)	melanin-rich	1	1553.71	27.0946	0.30078	84.6253
Fossil (10 Ma; Libros, SP)	Animalia	Aura	Pelophylax pueyoi	NA	melanosome film (abdomen)	melanin-rich	1	1604.29	41.2805	0.50693	76.5011
Fossil (10 Ma; Libros, SP)	Animalia	Aura	Pelophylax pueyoi	NA	melanosome film (abdomen)	melanin-rich	1	1620.1	0.17373	0.01518	10.7486
Fossil (10 Ma; Libros, SP)	Animalia	Aura	Pelophylax pueyoi	NA	melanosome film (abdomen)	melanin-rich	1	1765.1	1.00686	0.01966	48.113
Fossil (10 Ma; Libros, SP)	Animalia	Aura	Pelophylax pueyoi	NA	melanosome film (abdomen)	melanin-rich	2	1294.06	30.7909	0.17978	160.894
Fossil (10 Ma; Libros, SP)	Animalia	Aura	Pelophylax pueyoi	NA	melanosome film (abdomen)	melanin-rich	2	1368.18	14.6872	0.14641	94.2421
Fossil (10 Ma; Libros, SP)	Animalia	Aura	Pelophylax pueyoi	NA	melanosome film (abdomen)	melanin-rich	2	1489.87	162.27	0.54793	278.214
Fossil (10 Ma; Libros, SP)	Animalia	Aura	Pelophylax pueyoi	NA	melanosome film (abdomen)	melanin-rich	2	1562.37	28.6859	0.32291	83.456
Fossil (10 Ma; Libros, SP)	Animalia	Aura	Pelophylax pueyoi	NA	melanosome film (abdomen)	melanin-rich	2	1610.9	36.1656	0.46832	72.5469
Fossil (10 Ma; Libros, SP)	Animalia	Aura	Pelophylax pueyoi	NA	melanosome film (abdomen)	melanin-rich	2	1760.59	1.62775	0.02668	57.3209
Fossil (10 Ma; Libros, SP)	Animalia	Aura	Pelophylax pueyoi	NA	melanosome film (abdomen)	melanin-rich	3	1272.46	15.0418	0.12298	114.901
Fossil (10 Ma; Libros, SP)	Animalia	Aura	Pelophylax pueyoi	NA	melanosome film (abdomen)	melanin-rich	3	1361.92	21.1301	0.20102	98.7472
Fossil (10 Ma; Libros, SP)	Animalia	Aura	Pelophylax pueyoi	NA	melanosome film (abdomen)	melanin-rich	3	1477.37	169.693	0.53851	296.029
Fossil (10 Ma; Libros, SP)	Animalia	Aura	Pelophylax pueyoi	NA	melanosome film (abdomen)	melanin-rich	3	1568.32	39.4757	0.40845	90.7953
Fossil (10 Ma; Libros, SP)	Animalia	Aura	Pelophylax pueyoi	NA	melanosome film (abdomen)	melanin-rich	3	1612.89	27.9948	0.3839	68.5055
Fossil (10 Ma; Libros, SP)	Plantae	NA	NA	NA	plant fragment	amelanotic	1	1040.8	3.47952	0.02571	127.145
Fossil (10 Ma; Libros, SP)	Plantae	NA	NA	NA	plant fragment	amelanotic	1	1355.24	167.158	0.54692	287.123
Fossil (10 Ma; Libros, SP)	Plantae	NA	NA	NA	plant fragment	amelanotic	1	1355.24	18.6807	0.16748	104.783
Fossil (10 Ma; Libros, SP)	Plantae	NA	NA	NA	plant fragment	amelanotic	1	1449.42	5.48591	0.07005	73.5671
Fossil (10 Ma; Libros, SP)	Plantae	NA	NA	NA	plant fragment	amelanotic	1	1568.36	78.2157	0.48208	152.42
Fossil (10 Ma; Libros, SP)	Plantae	NA	NA	NA	plant fragment	amelanotic	1	1596.12	31.1496	0.43019	68.0237
Fossil (10 Ma; Libros, SP)	Plantae	NA	NA	NA	plant fragment	amelanotic	1	1611.55	1.91925	0.05853	30.8034
Fossil (10 Ma; Libros, SP)	Plantae	NA	NA	NA	plant fragment	amelanotic	1	1705.66	4.76222	0.03453	129.57
Fossil (10 Ma; Libros, SP)	Plantae	NA	NA	NA	plant fragment	amelanotic	2	1324.03	75.7824	0.34023	209.252
Fossil (10 Ma; Libros, SP)	Plantae	NA	NA	NA	plant fragment	amelanotic	2	1347.6	41.1897	0.36192	106.917
Fossil (10 Ma; Libros, SP)	Plantae	NA	NA	NA	plant fragment	amelanotic	2	1525.94	82.4243	0.40493	191.226
Fossil (10 Ma; Libros, SP)	Plantae	NA	NA	NA	plant fragment	amelanotic	2	1574.63	25.2671	0.31447	75.4814
Fossil (10 Ma; Libros, SP)	Plantae	NA	NA	NA	plant fragment	amelanotic	2	1606.46	28.9935	0.51147	53.2535
Fossil (10 Ma; Libros, SP)	Plantae	NA	NA	NA	plant fragment	amelanotic	2	1658.06	0.43894	0.01833	22.4905
Fossil (10 Ma; Libros, SP)	Plantae	NA	NA	NA	plant fragment	amelanotic	3	1261.11	15.5904	0.12426	117.867
Fossil (10 Ma; Libros, SP)	Plantae	NA	NA	NA	plant fragment	amelanotic	3	1362.2	61.4104	0.46368	124.421
Fossil (10 Ma; Libros, SP)	Plantae	NA	NA	NA	plant fragment	amelanotic	3	1526.97	98.7234	0.39489	234.862
Fossil (10 Ma; Libros, SP)	Plantae	NA	NA	NA	plant fragment	amelanotic	3	1594.51	46.4991	0.61665	70.8394
Fossil (10 Ma; Libros, SP)	Plantae	NA	NA	NA	plant fragment	amelanotic	3	1610.7	3.97499	0.11566	32.2857
