# Supplementary material for: A new non-destructive method to decipher the origin of organic matter in fossils using Raman spectroscopy
Source: Royal Society of Chemistry journal article supplement (doi:10.1039/d4ra04364b), 2024-01-01
Supplement: d4ra04364b5.xlsx [file d4ra04364b5.xlsx]

## Sheet: Sheet1
Dataset S2 - Raman spectra (baseline corrected and normalized) for all samples in the dataset.
status	Kingdom	class	species name	common name	tissue/sample type	category	replicate #	point analysis #	2001.20898	1999.67969	1998.14844	1996.61914	1995.08789	1993.55859	1992.02734	1990.49609	1988.96289	1987.43164	1985.89844	1984.36719	1982.83398	1981.30078	1979.76758	1978.23242	1976.69922	1975.16406	1973.62891	1972.09375	1970.55859	1969.02344	1967.48828	1965.95117	1964.41406	1962.87695	1961.33984	1959.80273	1958.26367	1956.72656	1955.1875	1953.64844	1952.10938	1950.57031	1949.03125	1947.49023	1945.94922	1944.4082	1942.86719	1941.32617	1939.78516
Untreated	Animalia	Aves	Corvus frugilegus	rook	black feather	melanin-rich	1	1	0.02043	0.020752	0.018417	0.018762	0.017944	0.018356	0.01791	0.019479	0.01888	0.018013	0.01754	0.016588	0.017058	0.016132	0.016286	0.016663	0.014738	0.012762	0.013257	0.013459	0.015476	0.014422	0.014154	0.013236	0.011899	0.012583	0.015448	0.016077	0.018675	0.016447	0.01438	0.012261	0.010376	0.011205	0.013813	0.013816	0.016105	0.015645	0.017996	0.018195	0.017731
Untreated	Animalia	Aves	Corvus frugilegus	rook	black feather	melanin-rich	1	2	0.019607	0.016227	0.01286	0.014419	0.015019	0.013668	0.017405	0.018164	0.02069	0.022579	0.021425	0.020962	0.017743	0.015701	0.015814	0.014436	0.015954	0.019991	0.018956	0.019653	0.022526	0.024092	0.022446	0.020289	0.019161	0.019227	0.016724	0.016449	0.017348	0.015822	0.012935	0.011561	0.012551	0.013192	0.013485	0.015749	0.016913	0.015955	0.015059	0.013932	0.014979
Untreated	Animalia	Aves	Corvus frugilegus	rook	black feather	melanin-rich	1	3	0.019791	0.020385	0.017928	0.017742	0.016895	0.014881	0.015802	0.015176	0.015395	0.01505	0.014518	0.016868	0.016691	0.016447	0.018237	0.018916	0.018924	0.018766	0.01776	0.016199	0.015134	0.01519	0.017769	0.02105	0.02018	0.019806	0.018391	0.016552	0.017405	0.016396	0.016708	0.015554	0.013622	0.013891	0.012663	0.012635	0.013739	0.0127	0.013039	0.013208	0.015427
Untreated	Animalia	Aves	Corvus frugilegus	rook	black feather	melanin-rich	2	1	0.00854	0.008931	0.00984	0.009121	0.008043	0.006407	0.005232	0.002222	0.003648	0.003046	0.003677	0.004854	0.006787	0.007529	0.006188	0.00427	0.00432	0.002054	0.002839	0.003945	0.004536	0.006133	0.006907	0.006302	0.006276	0.006031	0.005852	0.005104	0.003198	0.00315	0.002521	0.002524	0.002853	0.002138	0.000866	0.00178	0.004639	0.006924	0.007833	0.009059	0.008401
Untreated	Animalia	Aves	Corvus frugilegus	rook	black feather	melanin-rich	2	2	0.013833	0.010852	0.008116	0.006651	0.006501	0.006196	0.006677	0.007316	0.009767	0.008779	0.007531	0.006381	0.006021	0.006291	0.004541	0.005342	0.006082	0.005093	0.003534	0.003712	0.005095	0.007788	0.006731	0.006821	0.006868	0.006108	0.004841	0.003963	0.003651	0.00478	0.005374	0.006436	0.007789	0.006968	0.006349	0.005324	0.00509	0.006181	0.006776	0.00618	0.007982
Untreated	Animalia	Aves	Corvus frugilegus	rook	black feather	melanin-rich	2	3	0.011471	0.012002	0.011444	0.009906	0.008877	0.009249	0.010918	0.009771	0.010786	0.011384	0.009751	0.007108	0.005443	0.004137	0.003833	0.004834	0.007097	0.006896	0.007111	0.008793	0.008468	0.009043	0.010721	0.011279	0.009176	0.007088	0.006505	0.005865	0.005397	0.006272	0.007967	0.005299	0.003847	0.002433	0.001865	0.000957	0.003407	0.005863	0.007465	0.008013	0.010138
Untreated	Animalia	Aves	Corvus frugilegus	rook	black feather	melanin-rich	3	1	0.011269	0.009868	0.00848	0.007648	0.008196	0.007616	0.007036	0.004341	0.004724	0.003815	0.004776	0.00321	0.003906	0.004341	0.004243	0.002903	0.004126	0.004603	0.004997	0.003704	0.004351	0.005262	0.005702	0.004326	0.00409	0.002289	0.001971	0.001323	0.001592	0.002692	0.002944	0.004062	0.006599	0.005924	0.007118	0.006065	0.006692	0.005087	0.002541	0.002377	0.004807
Untreated	Animalia	Aves	Corvus frugilegus	rook	black feather	melanin-rich	3	2	0.015787	0.014531	0.013769	0.014289	0.014299	0.012816	0.010397	0.008637	0.006645	0.004529	0.003631	0.004861	0.007055	0.009851	0.011055	0.010766	0.009915	0.008914	0.009021	0.009073	0.009927	0.01046	0.00941	0.008644	0.00927	0.009929	0.010918	0.00713	0.005191	0.002252	0.000974	0.003958	0.006159	0.008319	0.008783	0.005778	0.006318	0.005106	0.005854	0.007654	0.007395
Untreated	Animalia	Aves	Corvus frugilegus	rook	black feather	melanin-rich	3	3	0.009186	0.008388	0.008128	0.007552	0.006037	0.006007	0.003449	0.00118	0.002161	0.002947	0.004726	0.006867	0.006582	0.006823	0.004444	0.002391	0.003315	0.002409	0.003948	0.005576	0.004669	0.005537	0.003841	0.003923	0.004124	0.004081	0.004228	0.003519	0.00218	0.002774	0.0011	0.001445	0.002167	0.004477	0.003821	0.001899	0.002509	0.002703	0.004354	0.005104	0.008422
Untreated	Animalia	Insecta	Harmonia axyridis	ladybird	insect cuticle (black)	melanin-rich	1	1	0.068749	0.066504	0.065985	0.061632	0.05843	0.063338	0.064357	0.069301	0.068541	0.064111	0.064923	0.061162	0.056055	0.057164	0.060787	0.060076	0.056942	0.053897	0.042756	0.051523	0.060088	0.061393	0.084651	0.106772	0.118646	0.121317	0.106153	0.112459	0.09572	0.072021	0.065325	0.052609	0.040244	0.038746	0.041466	0.051401	0.052292	0.053351	0.052041	0.045324	0.045859
Untreated	Animalia	Insecta	Harmonia axyridis	ladybird	insect cuticle (black)	melanin-rich	1	2	0.045412	0.040766	0.038988	0.036375	0.036555	0.034479	0.033647	0.037955	0.039014	0.04215	0.042588	0.040033	0.039204	0.037373	0.035477	0.033756	0.029655	0.029961	0.028353	0.029748	0.034101	0.035387	0.037122	0.038195	0.037316	0.033782	0.031898	0.035423	0.036649	0.032954	0.03293	0.032943	0.03272	0.029377	0.028802	0.030389	0.029957	0.027366	0.029775	0.029321	0.030295
Untreated	Animalia	Insecta	Harmonia axyridis	ladybird	insect cuticle (black)	melanin-rich	1	3	0.049798	0.049562	0.046599	0.043142	0.044011	0.042949	0.045002	0.045367	0.046159	0.046225	0.047631	0.045695	0.04404	0.040063	0.03903	0.038012	0.039508	0.039912	0.046943	0.044245	0.039856	0.036604	0.035409	0.031006	0.030861	0.03361	0.036807	0.032428	0.031997	0.032551	0.034575	0.032107	0.032196	0.034321	0.037054	0.035699	0.037099	0.03674	0.034837	0.036022	0.031733
Untreated	Animalia	Insecta	Harmonia axyridis	ladybird	insect cuticle (black)	melanin-rich	2	1	0.025555	0.022767	0.023419	0.022137	0.021002	0.016821	0.015391	0.013645	0.011553	0.010436	0.011504	0.009269	0.010356	0.009237	0.008877	0.007345	0.007229	0.0071	0.008169	0.007273	0.011294	0.015851	0.01723	0.015113	0.01575	0.013014	0.01109	0.00289	0.001681	0.002608	0	0.000623	0.002763	0.004787	0.006046	0.004003	0.008032	0.009501	0.008618	0.01055	0.012034
Untreated	Animalia	Insecta	Harmonia axyridis	ladybird	insect cuticle (black)	melanin-rich	2	2	0.030649	0.025798	0.024084	0.020193	0.019336	0.020283	0.020845	0.019141	0.017812	0.01624	0.017939	0.017823	0.019423	0.020343	0.017666	0.013007	0.008963	0.006561	0.008202	0.007326	0.010341	0.014555	0.014984	0.01225	0.011176	0.010828	0.009	0.005637	0.007437	0.010221	0.009723	0.009496	0.010168	0.008803	0.005775	0.00604	0.009053	0.008854	0.006713	0.007704	0.008396
Untreated	Animalia	Insecta	Harmonia axyridis	ladybird	insect cuticle (black)	melanin-rich	2	3	0.030066	0.032275	0.030985	0.028531	0.025839	0.024611	0.024586	0.025636	0.027766	0.028116	0.026183	0.023547	0.021173	0.019785	0.019331	0.020117	0.022089	0.022619	0.022671	0.022458	0.022358	0.021952	0.021697	0.022015	0.02242	0.020201	0.017206	0.013934	0.011721	0.010993	0.013495	0.017131	0.020846	0.023436	0.025045	0.025311	0.024426	0.024345	0.025289	0.024391	0.022612
Untreated	Animalia	Insecta	Harmonia axyridis	ladybird	insect cuticle (black)	melanin-rich	3	1	0.046121	0.041984	0.04149	0.043722	0.041729	0.039677	0.038505	0.032217	0.031306	0.032476	0.032839	0.035607	0.032809	0.032245	0.028047	0.023931	0.024595	0.023713	0.026009	0.029706	0.030233	0.033801	0.036017	0.035756	0.039251	0.039008	0.040004	0.03288	0.028392	0.022628	0.017362	0.013317	0.014653	0.015325	0.022933	0.024007	0.028346	0.027468	0.025365	0.020503	0.017457
Untreated	Animalia	Insecta	Harmonia axyridis	ladybird	insect cuticle (black)	melanin-rich	3	2	0.018696	0.019732	0.021972	0.022738	0.021633	0.016727	0.01608	0.013342	0.016136	0.023584	0.027331	0.027813	0.029983	0.029553	0.02945	0.01872	0.015544	0.019794	0.01713	0.015695	0.020045	0.029517	0.035524	0.030379	0.034479	0.035725	0.029794	0.025971	0.022327	0.016975	0.01734	0.02383	0.028761	0.025332	0.026215	0.025374	0.02554	0.026093	0.032553	0.037648	0.035037
Untreated	Animalia	Insecta	Harmonia axyridis	ladybird	insect cuticle (black)	melanin-rich	3	3	0.029982	0.029912	0.034146	0.031327	0.027122	0.020615	0.021254	0.026006	0.026272	0.027198	0.030425	0.025445	0.023908	0.022299	0.02596	0.024483	0.025217	0.023208	0.019845	0.012598	0.013417	0.019287	0.025389	0.027201	0.032055	0.029704	0.028671	0.024169	0.020966	0.024046	0.022262	0.024207	0.027035	0.027118	0.027625	0.026144	0.030073	0.034199	0.030441	0.029629	0.028297
Untreated	Fungi	Agaricomycetes	Auricularia auricola	Judas's ear	melanotic fungus	melanin-rich	1	1	0.152712	0.145937	0.146483	0.136181	0.13745	0.132482	0.140645	0.142061	0.141862	0.137476	0.139318	0.135447	0.135808	0.133547	0.146951	0.146233	0.139435	0.131915	0.13221	0.131101	0.128406	0.123845	0.123475	0.120502	0.119406	0.119212	0.129285	0.136332	0.135191	0.132899	0.124436	0.118858	0.110891	0.109631	0.112558	0.11337	0.107443	0.113598	0.119433	0.124971	0.12558
Untreated	Fungi	Agaricomycetes	Auricularia auricola	Judas's ear	melanotic fungus	melanin-rich	1	2	0.126896	0.119847	0.111008	0.104549	0.097498	0.094178	0.093932	0.092724	0.093565	0.095558	0.096383	0.098131	0.098057	0.100716	0.103671	0.103658	0.102872	0.101673	0.09851	0.096433	0.095646	0.096651	0.095437	0.092834	0.088539	0.084244	0.082217	0.082951	0.08582	0.087341	0.086438	0.087389	0.086325	0.086626	0.089975	0.092442	0.093354	0.091085	0.087984	0.087577	0.08674
Untreated	Fungi	Agaricomycetes	Auricularia auricola	Judas's ear	melanotic fungus	melanin-rich	1	3	0.134492	0.132092	0.129636	0.123789	0.128985	0.129408	0.134953	0.131369	0.133627	0.133893	0.134946	0.124662	0.124743	0.119476	0.122703	0.114097	0.119358	0.12663	0.131926	0.128063	0.120958	0.119947	0.129371	0.125299	0.12501	0.128978	0.130429	0.126613	0.120985	0.112001	0.108838	0.10749	0.106812	0.109268	0.117906	0.119481	0.122237	0.114132	0.109028	0.106316	0.103557
Untreated	Fungi	Agaricomycetes	Auricularia auricola	Judas's ear	melanotic fungus	melanin-rich	2	1	0.13454	0.12341	0.120697	0.110638	0.103769	0.092331	0.086057	0.068215	0.06247	0.062178	0.070848	0.07163	0.0822	0.080421	0.074695	0.0566	0.053086	0.050157	0.060477	0.06565	0.073662	0.082655	0.079726	0.066954	0.064289	0.054534	0.038727	0.022236	0.01602	0.021909	0.026418	0.035907	0.045701	0.047468	0.041646	0.042393	0.052376	0.054701	0.052842	0.05129	0.052123
Untreated	Fungi	Agaricomycetes	Auricularia auricola	Judas's ear	melanotic fungus	melanin-rich	2	2	0.10621	0.098618	0.091996	0.089044	0.082514	0.074005	0.066272	0.052928	0.051574	0.045045	0.039681	0.03978	0.050899	0.053801	0.060854	0.053012	0.056542	0.048394	0.044799	0.042645	0.048932	0.061649	0.069452	0.059907	0.061344	0.054766	0.043919	0.034131	0.021686	0.018371	0.012442	0.016852	0.027556	0.039495	0.037555	0.043489	0.045932	0.046849	0.041841	0.052216	0.054885
Untreated	Fungi	Agaricomycetes	Auricularia auricola	Judas's ear	melanotic fungus	melanin-rich	2	3	0.131771	0.127048	0.134666	0.128977	0.115593	0.09928	0.082914	0.064128	0.057618	0.056992	0.059571	0.05272	0.058091	0.060083	0.054126	0.047823	0.04386	0.045478	0.045537	0.044223	0.053474	0.067134	0.071999	0.059968	0.056303	0.055845	0.048677	0.03696	0.027324	0.027594	0.01913	0.012432	0.023109	0.033443	0.035542	0.041639	0.055574	0.060031	0.054127	0.047567	0.05433
Untreated	Fungi	Agaricomycetes	Auricularia auricola	Judas's ear	melanotic fungus	melanin-rich	3	1	0.104398	0.101666	0.103451	0.098839	0.089556	0.078429	0.06856	0.057611	0.05131	0.050429	0.052322	0.04706	0.051062	0.050749	0.046546	0.039991	0.037385	0.037782	0.043392	0.044445	0.048449	0.05769	0.062381	0.054829	0.051181	0.048133	0.043855	0.033948	0.020017	0.02177	0.015437	0.010358	0.01543	0.016424	0.013127	0.011963	0.021531	0.028967	0.029613	0.030453	0.037982
Untreated	Fungi	Agaricomycetes	Auricularia auricola	Judas's ear	melanotic fungus	melanin-rich	3	2	0.112903	0.103608	0.098672	0.095815	0.095401	0.084521	0.072769	0.058018	0.055127	0.048561	0.047215	0.038207	0.037855	0.036541	0.035549	0.026382	0.027748	0.02694	0.034577	0.03836	0.045691	0.060369	0.065985	0.057615	0.054252	0.048528	0.045275	0.035859	0.021839	0.026895	0.018194	0.022785	0.026648	0.032648	0.027964	0.021372	0.026754	0.029474	0.026559	0.037666	0.041265
Untreated	Fungi	Agaricomycetes	Auricularia auricola	Judas's ear	melanotic fungus	melanin-rich	3	3	0.101006	0.104908	0.108419	0.103344	0.093479	0.075614	0.056196	0.044413	0.043047	0.039809	0.042227	0.041281	0.048095	0.054671	0.048654	0.040046	0.036712	0.027691	0.027986	0.026008	0.032855	0.045976	0.047184	0.03971	0.043074	0.036092	0.03296	0.021002	0.015685	0.016973	0.009975	0.010769	0.019429	0.019596	0.01949	0.01999	0.027449	0.031515	0.024032	0.031247	0.030879
Untreated	Animalia	Aves	Egretta garzetta	egret	white feather	amelanotic	1	1	0.024587	0.026359	0.0217153	0.0235111	0.0262324	0.0261691	0.0264262	0.0260386	0.0243575	0.026624	0.0232263	0.0218498	0.0220476	0.0207185	0.0197376	0.0275417	0.0256866	0.0278739	0.0287164	0.0284514	0.0278541	0.0266873	0.0245711	0.0277038	0.0111227	0.0251882	0.0385654	0.0455547	0.0480031	0.0497633	0.0437708	0.029994	0.0135236	0.0210508	0.0221979	0.0156991	0.0155725	0.0176254	0.0196704	0.0205208	0.0280559
Untreated	Animalia	Aves	Egretta garzetta	egret	white feather	amelanotic	1	2	0.0252579	0.0254241	0.0232214	0.0206106	0.0216647	0.0213247	0.0244002	0.0286357	0.0316318	0.0311482	0.0325273	0.0293158	0.0279971	0.0245967	0.0236068	0.0217063	0.0212453	0.0178978	0.0186836	0.0178486	0.0157328	0.0123475	0.0130993	0.0139494	0.0182605	0.0209582	0.0220879	0.022598	0.0197038	0.0178298	0.0206068	0.0242113	0.0252994	0.0249783	0.0234745	0.0222617	0.0206635	0.0177315	0.0170552	0.0175426	0.0145162
Untreated	Animalia	Aves	Egretta garzetta	egret	white feather	amelanotic	1	3	0.0184297	0.0181229	0.0197383	0.0190316	0.0172647	0.0154707	0.0120807	0.0143795	0.0139135	0.0110555	0.0143679	0.0150863	0.0159949	0.0151445	0.0172997	0.0192413	0.0158435	0.014065	0.0172026	0.0165153	0.0155134	0.0127486	0.0171599	0.0166434	0.0160299	0.0152028	0.0177967	0.0174356	0.0164104	0.0125894	0.0149271	0.0155523	0.0135485	0.0114166	0.0107215	0.0118477	0.0128845	0.00929252	0.0112652	0.0154513	0.0133699
Untreated	Animalia	Aves	Egretta garzetta	egret	white feather	amelanotic	2	1	0.04832	0.052374	0.049386	0.05459	0.06154	0.046436	0.052899	0.080773	0.096865	0.110794	0.111178	0.101822	0.081067	0.053789	0.045128	0.054096	0.055385	0.064638	0.060095	0.053681	0.044809	0.038018	0.03182	0.041754	0.050935	0.066432	0.070617	0.074273	0.062594	0.048031	0.046618	0.047835	0.057253	0.064694	0.078342	0.088944	0.0832	0.071633	0.070207	0.060142	0.056603
Untreated	Animalia	Aves	Egretta garzetta	egret	white feather	amelanotic	2	2	0.022196	0.030974	0.030879	0.034693	0.043048	0.050699	0.038446	0.045362	0.059274	0.066477	0.061579	0.064681	0.06256	0.061194	0.050921	0.069796	0.071684	0.07743	0.072642	0.05832	0.060171	0.060797	0.052928	0.056739	0.053073	0.050242	0.038281	0.023505	0.039003	0.049131	0.051303	0.063157	0.072698	0.068429	0.066121	0.069816	0.080796	0.07412	0.068793	0.069881	0.061504
Untreated	Animalia	Aves	Egretta garzetta	egret	white feather	amelanotic	2	3	0.035933	0.034437	0.025967	0.018497	0.018953	0.028276	0.040376	0.042939	0.051192	0.050108	0.045198	0.043117	0.041551	0.049157	0.045274	0.047584	0.047849	0.049957	0.042939	0.043314	0.040633	0.031022	0.026807	0.036201	0.039786	0.045399	0.04663	0.050129	0.043691	0.033075	0.03331	0.036846	0.035713	0.033707	0.040037	0.040471	0.040605	0.043548	0.045077	0.041246	0.033474
Untreated	Animalia	Aves	Egretta garzetta	egret	white feather	amelanotic	3	1	0.02823	0.018435	0.007625	0.007813	0	0.010724	0.027934	0.034578	0.032493	0.02998	0.028997	0.031554	0.033099	0.03399	0.033086	0.028547	0.025931	0.025062	0.026431	0.033835	0.036368	0.02475	0.026468	0.031477	0.025912	0.031708	0.032694	0.042995	0.04205	0.037394	0.038459	0.04248	0.034649	0.03302	0.033153	0.034932	0.0478	0.048875	0.05914	0.065609	0.061102
Untreated	Animalia	Aves	Egretta garzetta	egret	white feather	amelanotic	3	2	0.015902	0.017072	0.015329	0.014817	0.025115	0.03124	0.027504	0.016205	0.011147	0.005366	0	0.007715	0.015545	0.020664	0.020868	0.018083	0.024101	0.028448	0.028153	0.02882	0.026023	0.025258	0.023023	0.019883	0.030626	0.032771	0.030685	0.029228	0.029411	0.028242	0.021865	0.020478	0.020495	0.017867	0.016941	0.025262	0.031321	0.031628	0.029675	0.029489	0.029611
Untreated	Animalia	Aves	Egretta garzetta	egret	white feather	amelanotic	3	3	0.066615	0.069039	0.065865	0.073336	0.071771	0.064922	0.061646	0.067803	0.059631	0.074629	0.066129	0.072255	0.073955	0.071732	0.069629	0.068906	0.057478	0.064516	0.059334	0.064801	0.073047	0.077777	0.073244	0.059517	0.060227	0.063265	0.069384	0.091699	0.101332	0.112839	0.110023	0.100191	0.106629	0.090419	0.083066	0.082014	0.080634	0.082621	0.083328	0.085071	0.094838
Untreated	Animalia	Malacostraca	Pandalus borealis	pink shrimp	shrimp cuticle	amelanotic	1	1	0.012204	0.010714	0.009967	0.01029	0.009865	0.010202	0.008596	0.007091	0.006592	0.004485	0.004479	0.004547	0.005012	0.005255	0.005397	0.005797	0.006599	0.008183	0.008233	0.008255	0.006954	0.006748	0.007185	0.00687	0.00622	0.006517	0.003713	0.003065	0.002358	0.003597	0.00467	0.005057	0.003836	0.002999	0.000491	0.000433	0.001795	0.001982	0.003411	0.004965	0.005259
Untreated	Animalia	Malacostraca	Pandalus borealis	pink shrimp	shrimp cuticle	amelanotic	1	2	0.030794	0.028782	0.028917	0.028731	0.027814	0.025606	0.024879	0.021038	0.02076	0.019883	0.019299	0.017274	0.015324	0.015587	0.014244	0.011704	0.011948	0.012914	0.011868	0.010989	0.009854	0.011385	0.010834	0.008698	0.009483	0.011482	0.009976	0.009497	0.008456	0.009503	0.008248	0.007328	0.010583	0.011718	0.011132	0.012384	0.012982	0.012872	0.010104	0.00923	0.011129
Untreated	Animalia	Malacostraca	Pandalus borealis	pink shrimp	shrimp cuticle	amelanotic	1	3	0.019461	0.018048	0.020488	0.021678	0.020215	0.01803	0.015106	0.010168	0.009895	0.008245	0.009783	0.009905	0.010224	0.010626	0.009902	0.009363	0.009992	0.007414	0.005586	0.005022	0.004573	0.006203	0.006602	0.006338	0.006884	0.007823	0.007696	0.006051	0.004372	0.005622	0.00396	0.003758	0.004274	0.006669	0.006401	0.005577	0.004664	0.005367	0.005283	0.005694	0.007065
Untreated	Animalia	Malacostraca	Pandalus borealis	pink shrimp	shrimp cuticle	amelanotic	2	1	0.009919	0.005281	0.007246	0.007996	0.011559	0.012161	0.016515	0.018378	0.020835	0.015465	0.011618	0.00998	0.008176	0.004501	0.007695	0.010911	0.01422	0.010721	0.010855	0.011615	0.009499	0.007016	0.009871	0.011798	0.011792	0.014078	0.017231	0.016361	0.014585	0.014401	0.013109	0.011335	0.008724	0.008809	0.006876	0.010087	0.010037	0.011465	0.010662	0.013641	0.013981
Untreated	Animalia	Malacostraca	Pandalus borealis	pink shrimp	shrimp cuticle	amelanotic	2	2	0.02613	0.029001	0.032951	0.038819	0.043605	0.038923	0.035613	0.031426	0.026111	0.021424	0.021037	0.023841	0.02852	0.030561	0.031469	0.035684	0.033101	0.030197	0.027095	0.030245	0.032579	0.028814	0.027137	0.027058	0.031391	0.031207	0.032846	0.037996	0.03232	0.029214	0.030312	0.032263	0.042957	0.046099	0.051378	0.048493	0.041628	0.036525	0.028152	0.024638	0.023523
Untreated	Animalia	Malacostraca	Pandalus borealis	pink shrimp	shrimp cuticle	amelanotic	2	3	0.010478	0.013885	0.010653	0.013596	0.020768	0.023436	0.02279	0.023411	0.021338	0.022888	0.020646	0.024428	0.029284	0.02322	0.018453	0.015487	0.010925	0.011898	0.014484	0.017946	0.021972	0.015525	0.018722	0.022323	0.021476	0.028581	0.031501	0.032245	0.031988	0.0284	0.028401	0.024728	0.015881	0.019581	0.017118	0.02106	0.024409	0.030007	0.026577	0.023284	0.016962
Untreated	Animalia	Malacostraca	Pandalus borealis	pink shrimp	shrimp cuticle	amelanotic	3	1	0.025899	0.023387	0.021232	0.020478	0.023692	0.021633	0.025603	0.028003	0.03183	0.035493	0.037324	0.035625	0.032554	0.026851	0.025495	0.020332	0.020468	0.021175	0.023363	0.027522	0.029138	0.03029	0.032721	0.028667	0.018581	0.015415	0.016221	0.020076	0.02037	0.024368	0.030158	0.029826	0.02826	0.030549	0.033335	0.032749	0.037627	0.038533	0.036459	0.031679	0.031959
Untreated	Animalia	Malacostraca	Pandalus borealis	pink shrimp	shrimp cuticle	amelanotic	3	2	0.033657	0.028519	0.024328	0.034059	0.035879	0.042484	0.047825	0.045402	0.046105	0.036163	0.029136	0.026088	0.020639	0.021675	0.023475	0.021122	0.022059	0.024641	0.022587	0.024304	0.023853	0.022129	0.018497	0.021068	0.029593	0.035584	0.036545	0.044241	0.045353	0.041581	0.032777	0.03602	0.032865	0.028078	0.029309	0.036305	0.042815	0.04855	0.047897	0.050884	0.045653
Untreated	Animalia	Malacostraca	Pandalus borealis	pink shrimp	shrimp cuticle	amelanotic	3	3	0.038919	0.036453	0.033768	0.040946	0.041017	0.040552	0.035716	0.025932	0.025263	0.02742	0.031805	0.038119	0.041023	0.041054	0.036958	0.029057	0.024307	0.025617	0.020633	0.026666	0.036123	0.037497	0.039345	0.037323	0.034755	0.032302	0.027055	0.024237	0.026673	0.031501	0.033591	0.034369	0.041174	0.040237	0.034456	0.027972	0.028936	0.032824	0.028696	0.022967	0.024143
Untreated	Animalia	Insecta	Harmonia axyridis	ladybird	insect cuticle (red)	amelanotic	1	1	0.0292377	0.0262066	0.0239517	0.0211352	0.0177769	0.013771	0.0121849	0.0071701	0.0059629	0.00455216	0.00518654	0.00440324	0.00500618	0.00587977	0.00654642	0.00389602	0.00625416	0.00676405	0.00904399	0.0101673	0.0117994	0.0144687	0.0136328	0.0103895	0.011096	0.0100251	0.00806574	0.00528125	0.00296023	0.00197037	0	0.00064946	0.0037769	0.00483891	0.00417127	0.00461466	0.0067675	0.00712549	0.00555319	0.00452647	0.00406547
Untreated	Animalia	Insecta	Harmonia axyridis	ladybird	insect cuticle (red)	amelanotic	1	2	0.0420378	0.038971	0.0377666	0.033201	0.0280084	0.0238741	0.0215057	0.0181451	0.0161338	0.0130655	0.0126633	0.00828275	0.00815154	0.00949761	0.0116103	0.00878434	0.0084437	0.00808597	0.0114589	0.0100286	0.0116843	0.0165728	0.0180738	0.0129493	0.0106116	0.00764021	0.0059867	0.00179755	0	0.00201424	0.000843957	0.00258555	0.00591729	0.00630201	0.00558134	0.00582029	0.00748625	0.00787395	0.00565281	0.00590327	0.00584707
Untreated	Animalia	Insecta	Harmonia axyridis	ladybird	insect cuticle (red)	amelanotic	1	3	0.048134	0.0442803	0.0421442	0.039843	0.0358516	0.030705	0.0251467	0.0200822	0.0167656	0.0143395	0.0143287	0.0144394	0.0161767	0.0187167	0.0178119	0.0166035	0.0176182	0.0179977	0.0203664	0.0194839	0.0214966	0.0255026	0.0250496	0.0223888	0.023239	0.0211275	0.0183943	0.0120847	0.0075052	0.00742481	0.00626272	0.00820755	0.0121974	0.0133092	0.0126347	0.0118548	0.0112355	0.00988293	0.00659453	0.00566319	0.00654434
Untreated	Animalia	Insecta	Harmonia axyridis	ladybird	insect cuticle (red)	amelanotic	2	1	0.172587	0.167012	0.169121	0.161042	0.154719	0.147729	0.134331	0.121447	0.118695	0.115653	0.125166	0.122319	0.131893	0.139495	0.137549	0.123902	0.13107	0.132684	0.153391	0.162041	0.170703	0.183177	0.188654	0.172204	0.170399	0.169047	0.169584	0.153985	0.149696	0.149998	0.145226	0.149286	0.158718	0.171513	0.169132	0.169505	0.184651	0.176834	0.172462	0.175124	0.175037
Untreated	Animalia	Insecta	Harmonia axyridis	ladybird	insect cuticle (red)	amelanotic	2	2	0.132449	0.13082	0.130836	0.126522	0.114726	0.107568	0.102025	0.088874	0.08209	0.07582	0.08072	0.075228	0.08408	0.096311	0.105235	0.096088	0.092168	0.089518	0.094245	0.094753	0.106004	0.125764	0.13424	0.122547	0.12018	0.114567	0.101345	0.086112	0.078104	0.080525	0.076035	0.081483	0.092014	0.094581	0.094996	0.106748	0.126446	0.137535	0.138789	0.138976	0.129113
Untreated	Animalia	Insecta	Harmonia axyridis	ladybird	insect cuticle (red)	amelanotic	2	3	0.182776	0.159558	0.154645	0.153185	0.135153	0.111484	0.090519	0.068836	0.059238	0.043234	0.050043	0.054889	0.069788	0.092396	0.100772	0.09683	0.091631	0.083257	0.098599	0.093582	0.112244	0.147495	0.159708	0.136302	0.135087	0.12234	0.115629	0.078759	0.064942	0.056848	0.047904	0.05024	0.073602	0.082068	0.087775	0.094748	0.127675	0.136788	0.13794	0.135718	0.133838
Untreated	Animalia	Insecta	Harmonia axyridis	ladybird	insect cuticle (red)	amelanotic	3	1	0.211958	0.209377	0.20185	0.198692	0.190234	0.172383	0.159509	0.148133	0.152873	0.147299	0.150916	0.151879	0.154516	0.154892	0.152655	0.142239	0.148831	0.148682	0.162557	0.17014	0.181832	0.203174	0.20926	0.194366	0.198371	0.190289	0.179956	0.162107	0.158125	0.156486	0.149785	0.164145	0.182957	0.186157	0.182876	0.188529	0.208243	0.211609	0.210269	0.216877	0.219079
Untreated	Animalia	Insecta	Harmonia axyridis	ladybird	insect cuticle (red)	amelanotic	3	2	0.175707	0.148513	0.141436	0.136113	0.124731	0.10038	0.076294	0.046769	0.038107	0.028201	0.041241	0.053954	0.074356	0.087799	0.091215	0.079376	0.088286	0.090549	0.103402	0.103827	0.113082	0.142662	0.143729	0.129102	0.126666	0.117618	0.101684	0.072396	0.066737	0.072839	0.05943	0.081196	0.100884	0.10865	0.10253	0.109381	0.133878	0.13581	0.13363	0.144948	0.151861
Untreated	Animalia	Insecta	Harmonia axyridis	ladybird	insect cuticle (red)	amelanotic	3	3	0.173916	0.148852	0.142861	0.138327	0.126846	0.108335	0.090781	0.060271	0.050143	0.046134	0.055125	0.061642	0.071874	0.066541	0.060737	0.039911	0.055383	0.069123	0.093918	0.10964	0.118134	0.136092	0.14123	0.115718	0.115231	0.106184	0.096962	0.077041	0.060733	0.065839	0.055473	0.057301	0.074195	0.085898	0.086828	0.09033	0.106433	0.110462	0.104191	0.101686	0.105457
Untreated	Plantae	Ginkgoopsida	Gingko biloba	Gingko	leaf	amelanotic	1	1	0.079712	0.066202	0.066805	0.066266	0.062863	0.053334	0.042443	0.03335	0.030475	0.027399	0.03159	0.033182	0.035575	0.034087	0.031756	0.027257	0.02816	0.031226	0.033867	0.03534	0.037334	0.038362	0.036788	0.0305	0.031316	0.033399	0.030481	0.018992	0.01436	0.007441	0.007561	0.014805	0.022689	0.028733	0.027683	0.026103	0.032439	0.026745	0.02419	0.025336	0.025799
Untreated	Plantae	Ginkgoopsida	Gingko biloba	Gingko	leaf	amelanotic	1	2	0.148884	0.129966	0.11874	0.106453	0.085943	0.070243	0.059648	0.044097	0.046667	0.041249	0.050591	0.049625	0.047149	0.04295	0.034691	0.026432	0.03293	0.033929	0.042848	0.047286	0.055403	0.063908	0.057344	0.044554	0.034335	0.028447	0.016216	0.003047	0.003674	0.008526	0.008874	0.012873	0.025272	0.039543	0.034285	0.034834	0.04402	0.047286	0.050705	0.051544	0.058339
Untreated	Plantae	Ginkgoopsida	Gingko biloba	Gingko	leaf	amelanotic	1	3	0.088161	0.074961	0.07555	0.075024	0.071698	0.062389	0.051748	0.042864	0.040056	0.03705	0.041144	0.0427	0.045038	0.043584	0.041307	0.036912	0.037793	0.040789	0.04337	0.044809	0.046757	0.047761	0.046223	0.040079	0.040877	0.042912	0.040061	0.028836	0.02431	0.017551	0.017668	0.024746	0.032448	0.038353	0.037327	0.035784	0.041974	0.036411	0.033915	0.035034	0.035487
Untreated	Plantae	Ginkgoopsida	Gingko biloba	Gingko	leaf	amelanotic	2	1	0.079582	0.084047	0.093123	0.097189	0.099549	0.091022	0.081379	0.069979	0.065752	0.05885	0.056666	0.054343	0.057163	0.055564	0.058551	0.054743	0.062267	0.059173	0.065212	0.065141	0.068536	0.077638	0.07744	0.073305	0.077533	0.076222	0.075409	0.06901	0.071545	0.072646	0.067313	0.065567	0.068399	0.071061	0.067795	0.06999	0.075857	0.072351	0.069569	0.06597	0.068631
Untreated	Plantae	Ginkgoopsida	Gingko biloba	Gingko	leaf	amelanotic	2	2	0.319485	0.292652	0.295315	0.277749	0.263643	0.249785	0.225194	0.168896	0.159607	0.128041	0.130478	0.1105	0.135065	0.146335	0.137792	0.107628	0.106078	0.084288	0.08372	0.07444	0.105278	0.122868	0.118534	0.111718	0.108107	0.099929	0.077798	0.054759	0.04921	0.041122	0.033611	0.049362	0.054066	0.064846	0.047382	0.059789	0.066815	0.057072	0.069215	0.082989	0.090209
Untreated	Plantae	Ginkgoopsida	Gingko biloba	Gingko	leaf	amelanotic	2	3	0.122473	0.125876	0.130635	0.133546	0.127035	0.119602	0.107943	0.102952	0.104396	0.095092	0.09074	0.094095	0.096352	0.100118	0.096156	0.098183	0.10405	0.105767	0.112147	0.120108	0.126177	0.131356	0.125624	0.122317	0.126866	0.121155	0.114825	0.101981	0.099985	0.099563	0.100317	0.106146	0.11168	0.105397	0.101904	0.100122	0.111999	0.114757	0.11983	0.122337	0.124526
Untreated	Plantae	Ginkgoopsida	Gingko biloba	Gingko	leaf	amelanotic	3	1	0.100101	0.099673	0.108083	0.10854	0.110836	0.107069	0.101972	0.088506	0.085586	0.073295	0.0746	0.071535	0.079131	0.082216	0.078662	0.073322	0.076789	0.079888	0.08291	0.080573	0.084452	0.090473	0.090198	0.094983	0.105359	0.113161	0.105235	0.096751	0.086641	0.080122	0.076112	0.076467	0.08331	0.086518	0.080832	0.083522	0.08631	0.083295	0.079697	0.078854	0.081831
Untreated	Plantae	Ginkgoopsida	Gingko biloba	Gingko	leaf	amelanotic	3	2	0.124405	0.119861	0.120462	0.127719	0.131557	0.12896	0.125131	0.118126	0.111202	0.103983	0.10142	0.098929	0.10065	0.105933	0.105177	0.103956	0.105794	0.110362	0.113677	0.114819	0.119967	0.134347	0.131255	0.126571	0.125325	0.121898	0.11459	0.101746	0.096695	0.105318	0.104859	0.106775	0.109383	0.109391	0.109176	0.108423	0.114446	0.123796	0.1292	0.131075	0.135344
Untreated	Plantae	Ginkgoopsida	Gingko biloba	Gingko	leaf	amelanotic	3	3	0.04486	0.043454	0.042089	0.042879	0.039434	0.03266	0.026922	0.022467	0.022185	0.021011	0.023427	0.025352	0.027285	0.025689	0.022742	0.021269	0.021254	0.020336	0.023662	0.025956	0.028938	0.030954	0.030715	0.030071	0.030418	0.030184	0.026011	0.022057	0.018286	0.01642	0.014975	0.016445	0.017369	0.018206	0.014938	0.014048	0.015128	0.016209	0.016042	0.017512	0.019406
Untreated	Plantae	Trebouxiophyceae	Chlorella sp	green algae	algal film	amelanotic	1	1	0.029253	0.025088	0.022422	0.020026	0.017288	0.014715	0.011026	0.007828	0.006928	0.006293	0.007882	0.008481	0.010376	0.011236	0.009197	0.007142	0.00712	0.007206	0.010368	0.011999	0.014044	0.017043	0.017179	0.014666	0.014175	0.011693	0.01013	0.00594	0.003093	0.002636	0.000824	0.001787	0.004862	0.006046	0.006748	0.007757	0.01096	0.012306	0.010224	0.010146	0.009413
Untreated	Plantae	Trebouxiophyceae	Chlorella sp	green algae	algal film	amelanotic	1	2	0.044511	0.039177	0.035579	0.032801	0.028508	0.025014	0.021584	0.017524	0.015336	0.013052	0.013545	0.01298	0.01503	0.016185	0.015924	0.012945	0.012823	0.012526	0.01567	0.016603	0.019212	0.022651	0.023878	0.018401	0.016538	0.013462	0.010429	0.005209	0.002638	0.00282	0.00222	0.004092	0.007025	0.008499	0.007995	0.008842	0.012383	0.012949	0.012362	0.013333	0.013445
Untreated	Plantae	Trebouxiophyceae	Chlorella sp	green algae	algal film	amelanotic	1	3	0.043647	0.039471	0.036543	0.03441	0.029899	0.024886	0.020532	0.016104	0.014618	0.012956	0.013863	0.013863	0.014447	0.014019	0.012721	0.00848	0.009065	0.010453	0.014464	0.015585	0.016716	0.020941	0.022998	0.019391	0.019719	0.018149	0.014956	0.008571	0.003481	0.002759	0.000874	0.002192	0.005777	0.006953	0.006892	0.008197	0.013093	0.015636	0.015009	0.014748	0.014527
Untreated	Plantae	Trebouxiophyceae	Chlorella sp	green algae	algal film	amelanotic	2	1	0.050765	0.048174	0.047118	0.046	0.042114	0.037275	0.03137	0.025268	0.022464	0.017839	0.018185	0.018531	0.020623	0.025443	0.028551	0.026223	0.024934	0.022582	0.025352	0.024084	0.026863	0.035395	0.038525	0.034568	0.03365	0.030603	0.026187	0.020401	0.016892	0.016526	0.014691	0.017184	0.018597	0.01819	0.017018	0.019008	0.024759	0.025925	0.024981	0.026008	0.022923
Untreated	Plantae	Trebouxiophyceae	Chlorella sp	green algae	algal film	amelanotic	2	2	0.082069	0.073451	0.069947	0.067592	0.062358	0.055769	0.049213	0.041371	0.039674	0.034808	0.0364	0.036307	0.039913	0.041134	0.03875	0.0345	0.035222	0.035462	0.040011	0.041065	0.045137	0.053742	0.056833	0.049988	0.04852	0.045677	0.040177	0.029137	0.022487	0.01992	0.014993	0.015562	0.023284	0.02608	0.027742	0.029258	0.038072	0.040837	0.039403	0.039862	0.043093
Untreated	Plantae	Trebouxiophyceae	Chlorella sp	green algae	algal film	amelanotic	2	3	0.097564	0.092101	0.087043	0.083272	0.075741	0.068563	0.061093	0.055804	0.050717	0.045414	0.046348	0.047881	0.052872	0.059122	0.06047	0.056618	0.05799	0.060489	0.069925	0.073952	0.077314	0.088706	0.089636	0.081041	0.081895	0.076638	0.072681	0.062029	0.054236	0.055406	0.051698	0.056093	0.063714	0.065364	0.066407	0.066394	0.074934	0.072883	0.069154	0.069428	0.068597
Untreated	Plantae	Trebouxiophyceae	Chlorella sp	green algae	algal film	amelanotic	3	1	0.071076	0.067019	0.064368	0.062872	0.058707	0.05177	0.045037	0.03863	0.034732	0.033969	0.036127	0.039307	0.045278	0.047553	0.045072	0.036238	0.034362	0.035418	0.040453	0.044281	0.052368	0.062037	0.064404	0.054736	0.057353	0.055296	0.050694	0.041567	0.03682	0.036335	0.03225	0.033606	0.040657	0.043455	0.042976	0.04358	0.050622	0.051095	0.048927	0.048992	0.047709
Untreated	Plantae	Trebouxiophyceae	Chlorella sp	green algae	algal film	amelanotic	3	2	0.070161	0.065113	0.060696	0.057944	0.053578	0.047115	0.038138	0.030182	0.027388	0.025151	0.026454	0.028243	0.032694	0.036918	0.036696	0.033187	0.034244	0.032261	0.033985	0.033073	0.037469	0.04766	0.052233	0.046891	0.045288	0.042446	0.03704	0.028373	0.024372	0.024488	0.021014	0.021949	0.026041	0.028609	0.026547	0.028257	0.036378	0.037714	0.034699	0.034851	0.03335
Untreated	Plantae	Trebouxiophyceae	Chlorella sp	green algae	algal film	amelanotic	3	3	0.085478	0.077373	0.075207	0.072193	0.066636	0.061938	0.05665	0.051886	0.049062	0.045546	0.047045	0.048732	0.052484	0.05611	0.053562	0.048614	0.049573	0.050183	0.056135	0.060224	0.065269	0.077156	0.080133	0.073988	0.072978	0.066828	0.060921	0.050101	0.043622	0.046811	0.04544	0.049557	0.054293	0.055802	0.05547	0.055906	0.062604	0.06663	0.065347	0.065756	0.06525
Untreated	Monera	Cyanophyceae	Nostoc punctiforme	cyanobacteria	cyanobacterial film	amelanotic	1	1	0.031396	0.026688	0.023617	0.020459	0.016641	0.012639	0.009981	0.006584	0.005354	0.004108	0.005238	0.005031	0.006011	0.006666	0.006672	0.004634	0.005105	0.005332	0.008058	0.009182	0.011372	0.015392	0.016932	0.013958	0.013448	0.011341	0.00889	0.004971	0.002667	0.003337	0.002139	0.002494	0.004616	0.005316	0.004365	0.004516	0.007864	0.009415	0.008593	0.008283	0.008332
Untreated	Monera	Cyanophyceae	Nostoc punctiforme	cyanobacteria	cyanobacterial film	amelanotic	1	2	0.039148	0.037698	0.029805	0.028687	0.021139	0.026248	0.018117	0.014447	0.005699	0.008404	0.014866	0.012762	0.012225	0.012731	0.007272	0.015099	0.011817	0.00767	0.003711	0.019622	0.017879	0.023221	0.015407	0.019136	0.024683	0.009987	0.010166	0.01672	0.006433	0.002637	0.007164	0.009547	0.007461	0.009586	0.014521	0.007368	0.006554	0.013106	0.0168	0.017933	0.004147
Untreated	Monera	Cyanophyceae	Nostoc punctiforme	cyanobacteria	cyanobacterial film	amelanotic	1	3	0.0327089	0.0280374	0.0245251	0.0215877	0.0180842	0.0147667	0.0121703	0.00857902	0.00714682	0.00626275	0.00725458	0.00747341	0.00885666	0.00870987	0.00849129	0.00625415	0.00603328	0.00621915	0.00839834	0.00909606	0.0108956	0.0140224	0.0159818	0.0137755	0.013824	0.011902	0.0090674	0.00437669	0.00182038	0.00197139	0.0019823	0.00253777	0.00490331	0.00479274	0.00379231	0.00371871	0.00670629	0.00794981	0.00818695	0.00841084	0.00792772
Untreated	Monera	Cyanophyceae	Nostoc punctiforme	cyanobacteria	cyanobacterial film	amelanotic	2	1	0.032068	0.028841	0.027867	0.026678	0.02468	0.021302	0.017355	0.012795	0.009938	0.008372	0.009229	0.009596	0.011428	0.012301	0.012541	0.010351	0.010447	0.011083	0.01252	0.012973	0.014291	0.017293	0.01836	0.015992	0.016724	0.015011	0.012352	0.008388	0.005316	0.004363	0.003007	0.003844	0.006246	0.006293	0.00564	0.005985	0.008717	0.009436	0.009012	0.009301	0.009263
Untreated	Monera	Cyanophyceae	Nostoc punctiforme	cyanobacteria	cyanobacterial film	amelanotic	2	2	0.032238	0.029167	0.027588	0.026549	0.024334	0.021358	0.017773	0.013939	0.011803	0.008981	0.008378	0.008025	0.010007	0.011186	0.01097	0.009525	0.009583	0.009207	0.010412	0.011186	0.012993	0.016678	0.01763	0.015465	0.015284	0.013798	0.011241	0.007373	0.00467	0.004721	0.002938	0.003332	0.005478	0.005507	0.004196	0.003642	0.006248	0.007846	0.007315	0.007458	0.008203
Untreated	Monera	Cyanophyceae	Nostoc punctiforme	cyanobacteria	cyanobacterial film	amelanotic	2	3	0.028538	0.02556	0.023702	0.021743	0.018864	0.016043	0.014434	0.01116	0.009506	0.007993	0.008353	0.007626	0.008451	0.009304	0.009223	0.007367	0.007801	0.00789	0.009889	0.01081	0.012543	0.015455	0.01647	0.014851	0.015118	0.012874	0.010753	0.007643	0.005592	0.005465	0.004307	0.005009	0.006779	0.00632	0.005492	0.005359	0.007256	0.007425	0.006475	0.006507	0.006205
Untreated	Monera	Cyanophyceae	Nostoc punctiforme	cyanobacteria	cyanobacterial film	amelanotic	3	1	0.035764	0.031931	0.029978	0.027455	0.023765	0.020424	0.016572	0.012575	0.010871	0.009114	0.009464	0.009251	0.011385	0.01288	0.012763	0.010953	0.011503	0.011406	0.013117	0.013718	0.015407	0.019253	0.020439	0.017875	0.017453	0.015247	0.012861	0.008126	0.0053	0.005178	0.003981	0.004629	0.006193	0.006529	0.006278	0.006417	0.008876	0.009719	0.00896	0.00864	0.007905
Untreated	Monera	Cyanophyceae	Nostoc punctiforme	cyanobacteria	cyanobacterial film	amelanotic	3	2	0.02971	0.026865	0.0258	0.024254	0.02163	0.018562	0.015824	0.011752	0.009382	0.007581	0.0068	0.006585	0.008106	0.009226	0.009279	0.00755	0.00785	0.008032	0.009071	0.010291	0.013331	0.017161	0.018381	0.015847	0.015587	0.013807	0.011705	0.008003	0.006755	0.006873	0.005262	0.004816	0.006338	0.006524	0.006052	0.006626	0.009913	0.010951	0.009647	0.008242	0.007554
Untreated	Monera	Cyanophyceae	Nostoc punctiforme	cyanobacteria	cyanobacterial film	amelanotic	3	3	0.040028	0.035986	0.033733	0.031018	0.027686	0.023552	0.01917	0.015003	0.012733	0.010992	0.011797	0.012169	0.014473	0.016045	0.015219	0.012799	0.012254	0.01259	0.014888	0.01629	0.019322	0.023288	0.023865	0.019062	0.01782	0.015465	0.012515	0.008384	0.005742	0.005469	0.003723	0.003221	0.005109	0.005789	0.005174	0.006314	0.009461	0.010842	0.009669	0.009126	0.008498
Matured (250℃, 24h)	Animalia	Aves	Corvus frugilegus	rook	black feather	melanin-rich	1	1	0.0454416	0.0437483	0.0356928	0.032395	0.0307565	0.0297833	0.0384398	0.0449327	0.0443283	0.0446911	0.0411887	0.0382107	0.0318916	0.0307925	0.038933	0.0453556	0.0475923	0.0546751	0.0554381	0.0523892	0.0472153	0.0436718	0.0432056	0.0432334	0.0363553	0.038659	0.0402509	0.0398646	0.0416859	0.0429732	0.0413645	0.0451347	0.0380604	0.0361933	0.0376942	0.0411417	0.0407554	0.0417105	0.0385602	0.0444251	0.0433925
Matured (250℃, 24h)	Animalia	Aves	Corvus frugilegus	rook	black feather	melanin-rich	1	2	0.0358264	0.0349153	0.0320113	0.0381602	0.0369079	0.0390085	0.0422621	0.0437916	0.0428249	0.0350772	0.0268793	0.0266903	0.0268943	0.0316105	0.0377116	0.0407566	0.046406	0.0426378	0.0424027	0.0395546	0.0379697	0.0364659	0.0375767	0.0343716	0.0310919	0.0275935	0.0304223	0.030473	0.0309853	0.0314015	0.0333243	0.0372915	0.0331051	0.0320467	0.0359552	0.0408718	0.0414524	0.0347328	0.0384286	0.0418827	0.0339888
Matured (250℃, 24h)	Animalia	Aves	Corvus frugilegus	rook	black feather	melanin-rich	1	3	0.038122	0.0246188	0.0234343	0.0250049	0.0292017	0.0294269	0.0249628	0.0269702	0.0198701	0.0134646	0.0171862	0.0209624	0.0286108	0.0228433	0.0204798	0.0251581	0.025986	0.018679	0.0224877	0.0222133	0.0276194	0.0279078	0.0276082	0.0303655	0.0328187	0.0230954	0.0224276	0.0224949	0.0254073	0.0298154	0.0270837	0.0246721	0.0260937	0.0214871	0.0192306	0.028454	0.0257615	0.0311148	0.0362637	0.0355862	0.0356824
Matured (250℃, 24h)	Animalia	Aves	Corvus frugilegus	rook	black feather	melanin-rich	2	1	0.040031	0.0463135	0.0548243	0.0609943	0.0695007	0.071336	0.0641658	0.0592006	0.057129	0.0568207	0.0546751	0.0491594	0.0452574	0.0454644	0.0492439	0.0455358	0.0446666	0.0431544	0.0422802	0.0441695	0.0410347	0.0495778	0.0507053	0.0464761	0.0458233	0.0451275	0.0435575	0.0446665	0.0452288	0.04652	0.0418801	0.0369776	0.0333687	0.0343506	0.037729	0.0409073	0.0475625	0.0492835	0.051592	0.0522718	0.0461254
Matured (250℃, 24h)	Animalia	Aves	Corvus frugilegus	rook	black feather	melanin-rich	2	2	0.035407	0.0320511	0.0306394	0.0271693	0.0279454	0.0228262	0.0272747	0.0265696	0.0215494	0.0173392	0.0170958	0.0195651	0.0217257	0.0211881	0.0264796	0.0269563	0.0274175	0.0243271	0.02863	0.029965	0.0322648	0.0308214	0.0310894	0.0324361	0.0293587	0.0258087	0.026337	0.025675	0.0231076	0.0219727	0.0273114	0.02415	0.0196768	0.0210902	0.0223299	0.0249942	0.0176279	0.0209204	0.0229909	0.0189732	0.0169426
Matured (250℃, 24h)	Animalia	Aves	Corvus frugilegus	rook	black feather	melanin-rich	2	3	0.138562	0.140173	0.138987	0.134901	0.129216	0.123486	0.118963	0.117204	0.117562	0.121857	0.125164	0.127344	0.125606	0.122196	0.1185	0.115131	0.113347	0.114291	0.115562	0.117293	0.115797	0.112864	0.111253	0.109533	0.108497	0.108159	0.107134	0.106216	0.103966	0.102169	0.10268	0.102759	0.101164	0.097754	0.0932352	0.0883558	0.0861033	0.0871483	0.0908041	0.0953642	0.09749
Matured (250℃, 24h)	Animalia	Aves	Corvus frugilegus	rook	black feather	melanin-rich	3	1	0.0853308	0.0858745	0.0809257	0.0771112	0.0804489	0.0830829	0.0831285	0.082796	0.0874314	0.0875974	0.0860056	0.0820179	0.0820266	0.0765689	0.0713099	0.067961	0.0634253	0.0607096	0.0616327	0.0658414	0.0645058	0.0676082	0.0641293	0.0654282	0.0588684	0.0598093	0.0633683	0.0703768	0.0646608	0.0695464	0.0705481	0.074556	0.0759785	0.0745099	0.0670044	0.0672609	0.0637972	0.0643546	0.0678304	0.0680032	0.0649895
Matured (250℃, 24h)	Animalia	Aves	Corvus frugilegus	rook	black feather	melanin-rich	3	2	0.039327	0.0359923	0.0367493	0.0335287	0.0354741	0.0414878	0.0371257	0.0271383	0.0306936	0.031695	0.0377768	0.0308242	0.016778	0.0171253	0.0207439	0.0247891	0.0279861	0.0285326	0.0386241	0.0425633	0.0369494	0.0327727	0.0319704	0.0347298	0.0354153	0.0335657	0.0327945	0.0246878	0.0260374	0.0285947	0.0346861	0.0372266	0.0299382	0.0250704	0.0307663	0.049801	0.0326667	0.0522497	0.0681199	0.0726973	0.0678895
Matured (250℃, 24h)	Animalia	Aves	Corvus frugilegus	rook	black feather	melanin-rich	3	3	0.0262932	0.0240481	0.0207742	0.0267987	0.0301445	0.0315386	0.0352756	0.0305067	0.0286732	0.0225942	0.0205793	0.0221712	0.0215307	0.0206141	0.0178175	0.0207867	0.0198916	0.0193361	0.0262075	0.0306309	0.0317368	0.0298252	0.0287923	0.0307118	0.026856	0.025196	0.0247393	0.0260238	0.0241524	0.0212271	0.0206174	0.0191856	0.0213206	0.019814	0.0189794	0.0216707	0.0220677	0.0256876	0.025676	0.028195	0.0255943
Matured (250℃, 24h)	Animalia	Aves	Egretta garzetta	egret	white feather	amelanotic	1	1	0.15498	0.149601	0.14123	0.142117	0.126706	0.13067	0.120431	0.131485	0.135123	0.138946	0.138106	0.15531	0.153446	0.155356	0.152524	0.144165	0.14126	0.11797	0.117229	0.111879	0.109583	0.110776	0.114007	0.114052	0.112814	0.110777	0.117757	0.10238	0.113063	0.118711	0.117771	0.117651	0.114146	0.117719	0.106163	0.099722	0.107482	0.107353	0.105839	0.103881	0.109161
Matured (250℃, 24h)	Animalia	Aves	Egretta garzetta	egret	white feather	amelanotic	1	2	0.145323	0.137843	0.13007	0.12094	0.113203	0.107298	0.10528	0.105639	0.104438	0.104382	0.105452	0.104988	0.104909	0.10706	0.11063	0.112883	0.110621	0.107468	0.104309	0.100657	0.099332	0.102263	0.107062	0.110028	0.107457	0.104153	0.101185	0.098904	0.098843	0.100121	0.101276	0.100377	0.094795	0.090587	0.088932	0.08928	0.09221	0.096257	0.099803	0.101595	0.100183
Matured (250℃, 24h)	Animalia	Aves	Egretta garzetta	egret	white feather	amelanotic	1	3	0.101555	0.093829	0.097453	0.100013	0.101443	0.105685	0.106322	0.10928	0.103905	0.098391	0.104421	0.10232	0.099829	0.102115	0.104329	0.099251	0.094505	0.089917	0.089193	0.082186	0.082865	0.079527	0.07876	0.078127	0.081452	0.08764	0.089558	0.085854	0.084577	0.07955	0.078377	0.076299	0.078203	0.079012	0.077836	0.077887	0.080833	0.079541	0.081005	0.082845	0.078617
Matured (250℃, 24h)	Animalia	Aves	Egretta garzetta	egret	white feather	amelanotic	2	1	0.104585	0.103867	0.105396	0.108673	0.107236	0.108022	0.108424	0.106089	0.102139	0.096467	0.091928	0.094609	0.098006	0.101633	0.106488	0.105375	0.096322	0.092277	0.08357	0.083368	0.091436	0.092892	0.088988	0.086926	0.090005	0.096206	0.096403	0.096659	0.097723	0.087567	0.079867	0.075393	0.07793	0.083277	0.084536	0.085796	0.080376	0.077356	0.072947	0.070041	0.073512
Matured (250℃, 24h)	Animalia	Aves	Egretta garzetta	egret	white feather	amelanotic	2	2	0.097854	0.099747	0.099171	0.089461	0.084621	0.077454	0.07121	0.074215	0.078791	0.085355	0.087329	0.083716	0.083091	0.084078	0.077282	0.077927	0.084245	0.086333	0.081577	0.082869	0.08078	0.081304	0.080236	0.077769	0.081649	0.085262	0.084352	0.087465	0.082435	0.078257	0.081241	0.07876	0.073567	0.077387	0.077362	0.077759	0.070491	0.064838	0.069188	0.069741	0.068235
Matured (250℃, 24h)	Animalia	Aves	Egretta garzetta	egret	white feather	amelanotic	2	3	0.229918	0.23503	0.225491	0.208643	0.198758	0.188961	0.203002	0.208032	0.210833	0.224772	0.234251	0.223275	0.226812	0.217436	0.211397	0.201286	0.181921	0.180287	0.179396	0.178083	0.175319	0.17346	0.181413	0.184243	0.192241	0.191887	0.183755	0.174142	0.15468	0.148037	0.147697	0.158232	0.157291	0.152598	0.158506	0.156184	0.168468	0.168043	0.158125	0.170661	0.158009
Matured (250℃, 24h)	Animalia	Aves	Egretta garzetta	egret	white feather	amelanotic	3	1	0.257823	0.255013	0.248366	0.241455	0.230957	0.239422	0.240287	0.25407	0.254215	0.251285	0.248289	0.254371	0.245226	0.237323	0.233416	0.231412	0.230829	0.222045	0.214069	0.207253	0.206351	0.205014	0.204757	0.201108	0.207114	0.202308	0.192949	0.187834	0.201476	0.202691	0.217301	0.221831	0.219273	0.210124	0.206837	0.211009	0.216973	0.214263	0.220018	0.209856	0.188334
Matured (250℃, 24h)	Animalia	Aves	Egretta garzetta	egret	white feather	amelanotic	3	2	0.207072	0.202912	0.197347	0.189834	0.180953	0.173186	0.169781	0.168177	0.165404	0.163955	0.164857	0.166716	0.169011	0.17233	0.176054	0.179106	0.18003	0.179811	0.177927	0.175624	0.172983	0.169934	0.166008	0.160257	0.15395	0.148721	0.144618	0.144355	0.145939	0.148415	0.151515	0.150124	0.14746	0.146166	0.146009	0.148095	0.15223	0.155679	0.15767	0.155965	0.15325
Matured (250℃, 24h)	Animalia	Aves	Egretta garzetta	egret	white feather	amelanotic	3	3	0.096257	0.096796	0.091398	0.085303	0.084874	0.081925	0.080593	0.073217	0.078901	0.084563	0.088095	0.091036	0.092313	0.090877	0.089162	0.086944	0.091261	0.088915	0.089985	0.083999	0.081135	0.077565	0.073073	0.067023	0.068784	0.066303	0.065189	0.068077	0.073965	0.074047	0.072705	0.072345	0.073439	0.069946	0.071156	0.073014	0.077065	0.078722	0.079759	0.084181	0.080762
Matured (250℃, 24h)	Fungi	Agaricomycetes	Auricularia auricola	Judas's ear	melanotic fungus	melanin-rich	1	1	0.050189	0.051074	0.050004	0.052693	0.054632	0.051074	0.053128	0.050628	0.045129	0.042263	0.041648	0.043405	0.041619	0.039743	0.039966	0.039362	0.039741	0.042572	0.044295	0.045818	0.039714	0.041143	0.036313	0.036222	0.038697	0.040925	0.04113	0.042667	0.035512	0.034649	0.032579	0.031207	0.032396	0.031848	0.029398	0.030261	0.025217	0.020877	0.024611	0.02765	0.032959
Matured (250℃, 24h)	Fungi	Agaricomycetes	Auricularia auricola	Judas's ear	melanotic fungus	melanin-rich	1	2	0.136699	0.135955	0.139105	0.133918	0.118767	0.100733	0.095884	0.091713	0.100801	0.102288	0.111013	0.117303	0.135109	0.140785	0.138334	0.117221	0.09721	0.090469	0.096499	0.107833	0.118598	0.120978	0.124197	0.112349	0.099831	0.098084	0.095285	0.094679	0.075425	0.072642	0.082175	0.081028	0.082135	0.085367	0.090165	0.099324	0.096075	0.08806	0.092338	0.085472	0.098156
Matured (250℃, 24h)	Fungi	Agaricomycetes	Auricularia auricola	Judas's ear	melanotic fungus	melanin-rich	1	3	0.098563	0.106148	0.102078	0.087702	0.074719	0.068133	0.054892	0.057277	0.05899	0.063554	0.064208	0.062298	0.0644	0.073632	0.073088	0.074197	0.073486	0.06773	0.068133	0.061796	0.063737	0.072276	0.073459	0.070984	0.07693	0.066862	0.074809	0.072463	0.076127	0.079133	0.07596	0.064671	0.056407	0.044879	0.044254	0.042537	0.048975	0.05433	0.067524	0.069508	0.075586
Matured (250℃, 24h)	Fungi	Agaricomycetes	Auricularia auricola	Judas's ear	melanotic fungus	melanin-rich	2	1	0.024934	0.019359	0.021359	0.026148	0.026988	0.027898	0.028828	0.032577	0.028971	0.025773	0.024376	0.027749	0.027152	0.028129	0.027042	0.03123	0.02997	0.029748	0.029315	0.030086	0.029539	0.0303	0.027111	0.027387	0.026394	0.026121	0.026212	0.023881	0.023696	0.023373	0.019972	0.018884	0.016059	0.015133	0.015781	0.01655	0.018596	0.015974	0.014894	0.017281	0.017496
Matured (250℃, 24h)	Fungi	Agaricomycetes	Auricularia auricola	Judas's ear	melanotic fungus	melanin-rich	2	2	0.074189	0.073718	0.075918	0.076242	0.082241	0.07978	0.07811	0.07255	0.068512	0.061745	0.062521	0.063158	0.062133	0.053	0.05402	0.057116	0.05492	0.055156	0.055734	0.062679	0.063507	0.058731	0.064958	0.064853	0.059392	0.056462	0.054191	0.05899	0.058888	0.056077	0.060258	0.063241	0.063604	0.061875	0.065412	0.064141	0.061866	0.055377	0.053085	0.057268	0.054089
Matured (250℃, 24h)	Fungi	Agaricomycetes	Auricularia auricola	Judas's ear	melanotic fungus	melanin-rich	2	3	0.094153	0.090377	0.085141	0.082515	0.0909	0.085246	0.08609	0.084463	0.076624	0.07498	0.075748	0.073823	0.081277	0.07443	0.070058	0.073311	0.0762	0.075462	0.079581	0.08214	0.084179	0.081263	0.078581	0.090076	0.094685	0.09012	0.085909	0.079111	0.072918	0.071722	0.069466	0.080287	0.077767	0.07736	0.07532	0.073711	0.069339	0.071533	0.073642	0.079741	0.074778
Matured (250℃, 24h)	Fungi	Agaricomycetes	Auricularia auricola	Judas's ear	melanotic fungus	melanin-rich	3	1	0.04479	0.040233	0.043134	0.042204	0.039442	0.042267	0.041079	0.04288	0.044808	0.0433	0.044901	0.040339	0.034888	0.037622	0.031607	0.032082	0.043489	0.058981	0.082118	0.094316	0.094788	0.087862	0.073067	0.061947	0.050279	0.043788	0.049241	0.044837	0.040505	0.039401	0.039875	0.041398	0.035714	0.03472	0.033354	0.031913	0.035145	0.037379	0.038262	0.039958	0.039124
Matured (250℃, 24h)	Fungi	Agaricomycetes	Auricularia auricola	Judas's ear	melanotic fungus	melanin-rich	3	2	0.093892	0.090528	0.08455	0.079723	0.079314	0.080927	0.0872	0.095729	0.100074	0.100368	0.101852	0.092372	0.087875	0.083082	0.082911	0.078164	0.072771	0.072124	0.079614	0.078568	0.076864	0.078421	0.080749	0.080487	0.081599	0.085105	0.086131	0.078779	0.07375	0.070609	0.068896	0.072143	0.074363	0.074023	0.075349	0.072703	0.073163	0.065333	0.064847	0.070594	0.068693
Matured (250℃, 24h)	Fungi	Agaricomycetes	Auricularia auricola	Judas's ear	melanotic fungus	melanin-rich	3	3	0.218942	0.222939	0.217193	0.219662	0.210848	0.203165	0.212791	0.223454	0.225061	0.236494	0.2379	0.227748	0.216262	0.203945	0.202964	0.207083	0.215535	0.238346	0.214069	0.213704	0.213338	0.212973	0.212608	0.212243	0.211878	0.211513	0.211148	0.210783	0.210418	0.210053	0.20985	0.208925	0.214647	0.212118	0.19722	0.214687	0.20277	0.211061	0.204005	0.184024	0.18419
Matured (250℃, 24h)	Plantae	Ginkgoopsida	Gingko biloba	Gingko	leaf	amelanotic	1	1	0.104998	0.097875	0.094921	0.1026	0.112872	0.115047	0.115954	0.109714	0.109808	0.105783	0.104632	0.103612	0.10977	0.100019	0.095912	0.090425	0.094889	0.103255	0.105077	0.106659	0.104992	0.09736	0.098021	0.096092	0.098401	0.099477	0.09309	0.088187	0.088925	0.085058	0.092345	0.097878	0.102214	0.101931	0.096465	0.095161	0.106015	0.092336	0.089234	0.090664	0.097748
Matured (250℃, 24h)	Plantae	Ginkgoopsida	Gingko biloba	Gingko	leaf	amelanotic	1	2	0.189993	0.173879	0.161284	0.162189	0.152222	0.16376	0.174988	0.186743	0.184357	0.177003	0.172392	0.170003	0.166566	0.171452	0.184053	0.178687	0.17634	0.167535	0.180723	0.173818	0.182964	0.193597	0.193676	0.179099	0.162543	0.149617	0.147162	0.132578	0.135159	0.13134	0.129605	0.133359	0.143654	0.144396	0.136569	0.132769	0.131768	0.121381	0.133784	0.134266	0.152263
Matured (250℃, 24h)	Plantae	Ginkgoopsida	Gingko biloba	Gingko	leaf	amelanotic	1	3	0.0636744	0.0757719	0.0746641	0.08684	0.0812656	0.0789869	0.0705155	0.063193	0.056312	0.0603634	0.0563582	0.0672443	0.0645584	0.0679918	0.0648688	0.0626397	0.0559876	0.06023	0.0530585	0.0508688	0.0567082	0.0608182	0.0577978	0.0620618	0.0613998	0.0678737	0.0681426	0.0803391	0.0859146	0.0866724	0.0686858	0.0676451	0.052149	0.0501252	0.0482225	0.0523855	0.056808	0.0639993	0.0593279	0.0684869	0.0545736
Matured (250℃, 24h)	Plantae	Ginkgoopsida	Gingko biloba	Gingko	leaf	amelanotic	2	1	0.272044	0.284059	0.288643	0.279716	0.256838	0.256742	0.243754	0.233009	0.239998	0.243941	0.247913	0.252273	0.243316	0.255799	0.249581	0.252489	0.252609	0.243291	0.232756	0.246821	0.254354	0.249014	0.253639	0.27046	0.255877	0.250432	0.228792	0.22412	0.224739	0.218018	0.235186	0.258927	0.27379	0.288309	0.267091	0.258154	0.255792	0.251208	0.251746	0.24869	0.250543
Matured (250℃, 24h)	Plantae	Ginkgoopsida	Gingko biloba	Gingko	leaf	amelanotic	2	2	0.132233	0.122754	0.109634	0.112017	0.110538	0.11376	0.118491	0.120755	0.126104	0.132971	0.122604	0.120585	0.10747	0.093625	0.096979	0.100415	0.104602	0.113239	0.109985	0.10909	0.10247	0.11228	0.109805	0.111028	0.12029	0.111385	0.088937	0.090074	0.082079	0.093923	0.09489	0.103495	0.123402	0.1151	0.104441	0.09875	0.089776	0.082415	0.087349	0.065357	0.076687
Matured (250℃, 24h)	Plantae	Ginkgoopsida	Gingko biloba	Gingko	leaf	amelanotic	2	3	0.133723	0.143907	0.137121	0.131514	0.138423	0.126921	0.12977	0.114395	0.117413	0.112773	0.11036	0.094685	0.095372	0.087076	0.090335	0.090537	0.110467	0.111982	0.117543	0.107137	0.096949	0.078646	0.0881	0.093919	0.102666	0.114581	0.132694	0.141553	0.115234	0.097662	0.108424	0.099974	0.100313	0.095806	0.090963	0.100922	0.082391	0.087337	0.110159	0.115446	0.110255
Matured (250℃, 24h)	Plantae	Ginkgoopsida	Gingko biloba	Gingko	leaf	amelanotic	3	1	0.223609	0.216372	0.210675	0.195425	0.167119	0.172407	0.177537	0.181037	0.179004	0.193187	0.187403	0.193536	0.181036	0.210063	0.211231	0.203443	0.198033	0.183184	0.179314	0.18225	0.17192	0.205095	0.205078	0.212035	0.20129	0.198776	0.186276	0.171597	0.165102	0.15869	0.158482	0.177631	0.177211	0.175061	0.155237	0.156441	0.16994	0.180018	0.19099	0.212448	0.215987
Matured (250℃, 24h)	Plantae	Ginkgoopsida	Gingko biloba	Gingko	leaf	amelanotic	3	2	0.172075	0.164209	0.170415	0.167093	0.161569	0.149863	0.149182	0.150806	0.142163	0.152654	0.168285	0.164852	0.162135	0.171046	0.172267	0.168638	0.161783	0.160639	0.168379	0.158257	0.156109	0.144624	0.142269	0.136469	0.129013	0.123619	0.138082	0.140991	0.145759	0.14741	0.156041	0.1475	0.143101	0.152165	0.153058	0.162811	0.173104	0.17565	0.168642	0.156876	0.152934
Matured (250℃, 24h)	Plantae	Ginkgoopsida	Gingko biloba	Gingko	leaf	amelanotic	3	3	0.180919	0.177634	0.224047	0.17109	0.135387	0.171306	0.230923	0.18028	0.139636	0.173817	0.185546	0.108566	0.18635	0.169695	0.218803	0.18448	0.166865	0.174641	0.131165	0.150162	0.20846	0.187164	0.136781	0.198055	0.129309	0.209209	0.136286	0.151589	0.161917	0.146183	0.144852	0.156442	0.162824	0.143158	0.164196	0.13488	0.147742	0.180436	0.20891	0.202937	0.160307
Matured (250℃, 24h)	Animalia	Malacostraca	Pandalus borealis	pink shrimp	shrimp cuticle	amelanotic	1	1	0.088292	0.081411	0.078019	0.072973	0.064894	0.064175	0.055569	0.068492	0.075112	0.082554	0.088344	0.087845	0.081077	0.075436	0.064432	0.06466	0.060444	0.068142	0.068185	0.065635	0.064828	0.058772	0.065429	0.067677	0.068138	0.080917	0.081149	0.079632	0.077876	0.072569	0.071386	0.064202	0.059333	0.063533	0.064864	0.069182	0.072715	0.068662	0.056156	0.053629	0.054501
Matured (250℃, 24h)	Animalia	Malacostraca	Pandalus borealis	pink shrimp	shrimp cuticle	amelanotic	1	2	0.057212	0.058106	0.061988	0.05963	0.056487	0.056091	0.055938	0.057089	0.047881	0.044927	0.045095	0.041444	0.048076	0.0568	0.057184	0.061226	0.05139	0.044891	0.039153	0.040156	0.045235	0.049276	0.053731	0.058356	0.057721	0.052473	0.049154	0.049535	0.043632	0.04022	0.043797	0.045984	0.05149	0.053898	0.056276	0.055619	0.048777	0.047371	0.045206	0.045448	0.047686
Matured (250℃, 24h)	Animalia	Malacostraca	Pandalus borealis	pink shrimp	shrimp cuticle	amelanotic	1	3	0.032144	0.0326	0.032218	0.03736	0.037003	0.038627	0.035455	0.040506	0.040536	0.040814	0.041613	0.040769	0.039334	0.035832	0.034041	0.035098	0.0337	0.031455	0.032404	0.031367	0.03244	0.036938	0.039457	0.037693	0.037603	0.034161	0.032159	0.026884	0.024615	0.028463	0.029364	0.02816	0.033142	0.031962	0.034889	0.035957	0.039021	0.038141	0.035373	0.031084	0.032339
Matured (250℃, 24h)	Animalia	Malacostraca	Pandalus borealis	pink shrimp	shrimp cuticle	amelanotic	2	1	0.098227	0.091717	0.09311	0.097807	0.099483	0.095133	0.098025	0.096179	0.093208	0.086409	0.082617	0.084354	0.083466	0.086053	0.093071	0.09866	0.10417	0.101816	0.095423	0.085678	0.078373	0.077548	0.075905	0.082446	0.085402	0.086376	0.090372	0.088527	0.082092	0.082841	0.083659	0.083278	0.079581	0.077687	0.08732	0.088733	0.086885	0.084782	0.081181	0.079422	0.077752
Matured (250℃, 24h)	Animalia	Malacostraca	Pandalus borealis	pink shrimp	shrimp cuticle	amelanotic	2	2	0.043861	0.042617	0.03815	0.031298	0.029195	0.027605	0.025618	0.025522	0.029042	0.035961	0.036202	0.035671	0.041581	0.040258	0.037061	0.034338	0.03397	0.035434	0.031901	0.031779	0.030702	0.026315	0.025237	0.024174	0.021357	0.026119	0.0249	0.027324	0.02823	0.02961	0.029904	0.031427	0.030722	0.035994	0.036221	0.035038	0.033167	0.03027	0.027247	0.027967	0.027678
Matured (250℃, 24h)	Animalia	Malacostraca	Pandalus borealis	pink shrimp	shrimp cuticle	amelanotic	2	3	0.085477	0.080098	0.081876	0.082382	0.081561	0.084555	0.083626	0.081979	0.082579	0.075976	0.079356	0.075752	0.075195	0.079036	0.077841	0.073947	0.074468	0.074773	0.073376	0.066237	0.063067	0.062428	0.063648	0.064994	0.066381	0.075557	0.086045	0.089935	0.089263	0.084371	0.080934	0.077	0.069106	0.072666	0.080432	0.078944	0.073654	0.067148	0.066624	0.065498	0.065385
Matured (250℃, 24h)	Animalia	Malacostraca	Pandalus borealis	pink shrimp	shrimp cuticle	amelanotic	3	1	0.084757	0.084027	0.083719	0.085098	0.087512	0.086456	0.081056	0.084513	0.081983	0.086263	0.091127	0.092632	0.092467	0.088238	0.082552	0.078023	0.072191	0.079131	0.078624	0.07785	0.077501	0.074216	0.077935	0.078504	0.077719	0.084652	0.080273	0.083182	0.082419	0.078743	0.076822	0.072161	0.068096	0.067613	0.070786	0.075932	0.078227	0.084454	0.08373	0.082338	0.083707
Matured (250℃, 24h)	Animalia	Malacostraca	Pandalus borealis	pink shrimp	shrimp cuticle	amelanotic	3	2	0.084665	0.086808	0.091515	0.089401	0.087444	0.08304	0.079892	0.07884	0.077113	0.079677	0.079619	0.077416	0.08017	0.078475	0.076149	0.077006	0.074918	0.078071	0.073689	0.074251	0.075876	0.069292	0.06452	0.065889	0.066526	0.070583	0.07099	0.078387	0.078702	0.074871	0.072782	0.069616	0.070646	0.0694	0.067898	0.075567	0.074298	0.072801	0.071926	0.070335	0.074561
Matured (250℃, 24h)	Animalia	Malacostraca	Pandalus borealis	pink shrimp	shrimp cuticle	amelanotic	3	3	0.070928	0.077251	0.085299	0.084489	0.080448	0.075801	0.070238	0.065741	0.066289	0.069015	0.0738	0.07401	0.068986	0.065657	0.062775	0.056375	0.053966	0.055951	0.052872	0.047185	0.044651	0.048195	0.05718	0.061462	0.067485	0.07044	0.064327	0.054772	0.050671	0.052519	0.053107	0.055654	0.05613	0.062684	0.060251	0.057564	0.059435	0.060369	0.057467	0.060052	0.059049
Matured (250℃, 24h)	Animalia	Insecta	Harmonia axyridis	ladybird	insect cuticle (black)	melanin-rich	1	1	0.053376	0.046878	0.043364	0.040359	0.037772	0.034127	0.027646	0.02387	0.02135	0.019174	0.020484	0.016579	0.020659	0.019154	0.018043	0.014173	0.013689	0.015635	0.0161	0.017136	0.022644	0.025887	0.028419	0.020856	0.021567	0.020602	0.016469	0.013971	0.011777	0.008311	0.005912	0.00391	0.007855	0.008619	0.007945	0.011176	0.017171	0.017156	0.019455	0.020481	0.019389
Matured (250℃, 24h)	Animalia	Insecta	Harmonia axyridis	ladybird	insect cuticle (black)	melanin-rich	1	2	0.049817	0.042036	0.039867	0.036796	0.033988	0.028621	0.024412	0.020197	0.018786	0.01665	0.018974	0.017588	0.019925	0.01946	0.017633	0.01566	0.014047	0.013426	0.015483	0.015795	0.017771	0.022806	0.025702	0.022333	0.02203	0.019539	0.015186	0.008014	0.005164	0.00457	0.002879	0.003696	0.007519	0.008055	0.005792	0.005974	0.012444	0.013507	0.013422	0.014972	0.014664
Matured (250℃, 24h)	Animalia	Insecta	Harmonia axyridis	ladybird	insect cuticle (black)	melanin-rich	1	3	0.050425	0.047599	0.048216	0.045872	0.042261	0.038036	0.030055	0.022659	0.017269	0.015463	0.019344	0.018552	0.024323	0.023521	0.0213	0.018004	0.016472	0.017289	0.019313	0.020809	0.025769	0.030275	0.035796	0.03159	0.029586	0.023897	0.016523	0.012415	0.006749	0.008182	0.009684	0.010846	0.013679	0.016008	0.016763	0.019456	0.019467	0.017147	0.01591	0.014996	0.015608
Matured (250℃, 24h)	Animalia	Insecta	Harmonia axyridis	ladybird	insect cuticle (black)	melanin-rich	2	1	0.062806	0.058506	0.054528	0.050424	0.04836	0.043222	0.037831	0.032472	0.031619	0.031589	0.030599	0.027534	0.029751	0.030902	0.032692	0.031981	0.032438	0.031035	0.028311	0.025446	0.026346	0.032037	0.036854	0.031859	0.03302	0.029304	0.024799	0.017573	0.012996	0.01091	0.010952	0.010642	0.014331	0.013951	0.014333	0.017136	0.026758	0.02889	0.030305	0.028785	0.024695
Matured (250℃, 24h)	Animalia	Insecta	Harmonia axyridis	ladybird	insect cuticle (black)	melanin-rich	2	2	0.049216	0.045002	0.045849	0.044868	0.040465	0.033574	0.024481	0.020159	0.015835	0.014812	0.019198	0.019225	0.023456	0.022126	0.019343	0.018266	0.016132	0.015766	0.017469	0.017751	0.023038	0.027486	0.031923	0.029749	0.029136	0.023988	0.016004	0.011669	0.007839	0.007039	0.005385	0.007454	0.011902	0.013172	0.013153	0.016796	0.021716	0.022683	0.021347	0.021449	0.01959
Matured (250℃, 24h)	Animalia	Insecta	Harmonia axyridis	ladybird	insect cuticle (black)	melanin-rich	2	3	0.045929	0.04266	0.0418	0.041495	0.040179	0.04087	0.039111	0.033526	0.0307	0.027144	0.026615	0.026895	0.031197	0.033771	0.035167	0.0321	0.029858	0.024841	0.022177	0.021617	0.025867	0.03076	0.035067	0.035952	0.037016	0.03373	0.029328	0.022749	0.021007	0.019703	0.01851	0.022067	0.025845	0.027473	0.027526	0.026469	0.031158	0.030996	0.027999	0.026521	0.027035
Matured (250℃, 24h)	Animalia	Insecta	Harmonia axyridis	ladybird	insect cuticle (black)	melanin-rich	3	1	0.060057	0.053721	0.051003	0.04829	0.046551	0.043248	0.038356	0.034159	0.030522	0.028503	0.029849	0.027986	0.031915	0.030703	0.029492	0.0271	0.026471	0.02678	0.027796	0.026361	0.028712	0.031803	0.036242	0.031068	0.031191	0.02895	0.023847	0.017326	0.014869	0.014207	0.013591	0.014154	0.01658	0.017267	0.015714	0.017275	0.024374	0.02382	0.022328	0.023467	0.020634
Matured (250℃, 24h)	Animalia	Insecta	Harmonia axyridis	ladybird	insect cuticle (black)	melanin-rich	3	2	0.04745	0.041951	0.040571	0.038271	0.037887	0.033557	0.027144	0.023515	0.021988	0.020233	0.01943	0.017987	0.021564	0.02348	0.022904	0.022645	0.02481	0.024791	0.02154	0.019592	0.020959	0.026462	0.030141	0.023833	0.026284	0.022896	0.016633	0.009922	0.007027	0.008339	0.010502	0.010223	0.01602	0.015244	0.014014	0.01413	0.019945	0.021266	0.021146	0.020681	0.020065
Matured (250℃, 24h)	Animalia	Insecta	Harmonia axyridis	ladybird	insect cuticle (black)	melanin-rich	3	3	0.060255	0.053978	0.05341	0.049021	0.047025	0.044327	0.037416	0.029868	0.026844	0.021108	0.023115	0.021719	0.02784	0.026176	0.024908	0.023835	0.021512	0.016813	0.017243	0.019232	0.02391	0.027791	0.034672	0.033851	0.034876	0.03292	0.024326	0.015599	0.00977	0.005422	0.004544	0.007665	0.013247	0.018655	0.01742	0.020338	0.030419	0.029793	0.029875	0.028977	0.027998
Matured (250℃, 24h)	Animalia	Insecta	Harmonia axyridis	ladybird	insect cuticle (red)	amelanotic	1	1	0.071196	0.064032	0.059698	0.056368	0.053434	0.052156	0.045049	0.037063	0.032772	0.029038	0.02618	0.022065	0.027658	0.028803	0.029422	0.027476	0.030705	0.033389	0.032501	0.02921	0.031014	0.035732	0.040055	0.032339	0.035247	0.033091	0.023516	0.013906	0.010041	0.00836	0.003935	0.006108	0.011138	0.013932	0.011533	0.015761	0.024603	0.026429	0.024283	0.027658	0.024984
Matured (250℃, 24h)	Animalia	Insecta	Harmonia axyridis	ladybird	insect cuticle (red)	amelanotic	1	2	0.053328	0.05115	0.050788	0.050307	0.049116	0.043344	0.034292	0.023358	0.0184	0.017444	0.01922	0.019308	0.027123	0.027415	0.026021	0.022887	0.023673	0.023963	0.024686	0.023473	0.028228	0.030876	0.031061	0.024861	0.022974	0.02062	0.015589	0.009365	0.008155	0.00763	0.005068	0.006336	0.008159	0.009886	0.011285	0.014211	0.023103	0.02315	0.022728	0.022942	0.018979
Matured (250℃, 24h)	Animalia	Insecta	Harmonia axyridis	ladybird	insect cuticle (red)	amelanotic	1	3	0.044002	0.03878	0.037532	0.034236	0.032545	0.028256	0.024528	0.017534	0.012602	0.010161	0.013153	0.013152	0.018975	0.019442	0.020005	0.016781	0.015105	0.013822	0.014993	0.015783	0.019262	0.022517	0.026313	0.021637	0.022949	0.021121	0.01404	0.008783	0.005461	0.00544	0.006454	0.009202	0.015431	0.017653	0.015586	0.016653	0.02049	0.02076	0.018796	0.016965	0.015647
Matured (250℃, 24h)	Animalia	Insecta	Harmonia axyridis	ladybird	insect cuticle (red)	amelanotic	2	1	0.059339	0.054648	0.05159	0.046727	0.041228	0.036418	0.028236	0.02456	0.023593	0.023377	0.025964	0.026965	0.03333	0.036017	0.036791	0.034326	0.032911	0.027088	0.025919	0.026181	0.02976	0.034711	0.039751	0.03451	0.032558	0.0285	0.022354	0.017364	0.012896	0.010697	0.009699	0.010421	0.012709	0.014309	0.014721	0.01748	0.023154	0.025139	0.024029	0.023646	0.01959
Matured (250℃, 24h)	Animalia	Insecta	Harmonia axyridis	ladybird	insect cuticle (red)	amelanotic	2	2	0.062422	0.057702	0.052567	0.052704	0.053161	0.045103	0.035289	0.028486	0.024244	0.022233	0.02526	0.029311	0.036272	0.035456	0.033359	0.029112	0.028003	0.026596	0.027936	0.026198	0.030828	0.035533	0.03891	0.03207	0.031388	0.026181	0.018229	0.010037	0.007828	0.008658	0.011618	0.015679	0.021997	0.02202	0.020377	0.022172	0.028785	0.029784	0.030025	0.029254	0.026009
Matured (250℃, 24h)	Animalia	Insecta	Harmonia axyridis	ladybird	insect cuticle (red)	amelanotic	2	3	0.062732	0.058886	0.055483	0.054806	0.052761	0.04669	0.037744	0.032429	0.029769	0.029047	0.031085	0.030955	0.034384	0.031799	0.030216	0.027228	0.024799	0.019627	0.01803	0.016332	0.022567	0.032195	0.039009	0.035436	0.036684	0.030064	0.020608	0.00921	0.005572	0.005981	0.008277	0.013094	0.020189	0.022255	0.019336	0.016298	0.018914	0.017946	0.019353	0.020542	0.021166
Matured (250℃, 24h)	Animalia	Insecta	Harmonia axyridis	ladybird	insect cuticle (red)	amelanotic	3	1	0.053571	0.053797	0.053127	0.052042	0.048149	0.042731	0.036368	0.030236	0.02612	0.024068	0.022938	0.023873	0.023675	0.022974	0.021679	0.020496	0.019821	0.020173	0.02127	0.024973	0.027335	0.029656	0.031378	0.032008	0.031243	0.027666	0.022853	0.018502	0.013533	0.011622	0.012298	0.014793	0.01758	0.019086	0.020352	0.02071	0.019616	0.01935	0.018627	0.017621	0.015158
Matured (250℃, 24h)	Animalia	Insecta	Harmonia axyridis	ladybird	insect cuticle (red)	amelanotic	3	2	0.06782	0.061667	0.059259	0.058325	0.055413	0.050992	0.049455	0.039635	0.03288	0.029035	0.028395	0.029087	0.027991	0.028483	0.03122	0.027019	0.027482	0.029806	0.032635	0.032776	0.030958	0.034949	0.037749	0.031455	0.030159	0.031627	0.029096	0.027423	0.022976	0.018139	0.015178	0.016764	0.021221	0.02784	0.02642	0.031607	0.035835	0.032063	0.026898	0.024075	0.023029
Matured (250℃, 24h)	Animalia	Insecta	Harmonia axyridis	ladybird	insect cuticle (red)	amelanotic	3	3	0.077155	0.070087	0.064226	0.058622	0.053186	0.047301	0.041665	0.036028	0.032071	0.030193	0.031157	0.033498	0.035899	0.037504	0.037003	0.034795	0.032195	0.030236	0.031739	0.034449	0.038314	0.041781	0.04247	0.040569	0.035255	0.027756	0.019752	0.013079	0.009509	0.007551	0.007247	0.008293	0.01046	0.013696	0.017862	0.022646	0.026967	0.030322	0.031263	0.0298	0.026907
Matured (250℃, 24h)	Monera	Cyanophyceae	Nostoc punctiforme	cyanobacteria	cyanobacterial film	amelanotic	1	1	0.371952	0.363204	0.368151	0.411359	0.426255	0.418571	0.40075	0.385872	0.369682	0.370825	0.396913	0.405244	0.367351	0.337632	0.3426	0.361135	0.359724	0.360946	0.40335	0.402263	0.400349	0.386587	0.35959	0.363148	0.352646	0.347961	0.365549	0.346021	0.342894	0.336919	0.30243	0.315092	0.331589	0.355559	0.356435	0.330084	0.312431	0.318749	0.306664	0.32879	0.364528
Matured (250℃, 24h)	Monera	Cyanophyceae	Nostoc punctiforme	cyanobacteria	cyanobacterial film	amelanotic	1	2	0.270851	0.282055	0.305542	0.283585	0.273249	0.253357	0.259171	0.242094	0.223861	0.219815	0.208506	0.206895	0.206329	0.196598	0.215412	0.207681	0.210956	0.228012	0.244258	0.273731	0.245286	0.236476	0.244719	0.236941	0.245744	0.277647	0.272411	0.270377	0.249226	0.256766	0.254121	0.242221	0.238966	0.229436	0.215191	0.224983	0.220062	0.225261	0.218819	0.229298	0.226861
Matured (250℃, 24h)	Monera	Cyanophyceae	Nostoc punctiforme	cyanobacteria	cyanobacterial film	amelanotic	1	3	0.341414	0.345704	0.331551	0.346343	0.341367	0.319297	0.316213	0.331327	0.361543	0.387018	0.389639	0.415466	0.401411	0.356461	0.303831	0.304978	0.282091	0.266349	0.292672	0.285314	0.298551	0.322724	0.31954	0.365602	0.358134	0.34667	0.33906	0.27829	0.268964	0.289205	0.302608	0.309298	0.323009	0.327652	0.361144	0.3769	0.397261	0.437298	0.465617	0.436547	0.386657
Matured (250℃, 24h)	Monera	Cyanophyceae	Nostoc punctiforme	cyanobacteria	cyanobacterial film	amelanotic	2	1	0.138212	0.132072	0.132273	0.119007	0.122686	0.127185	0.152222	0.164232	0.170117	0.160304	0.149805	0.126237	0.10558	0.100466	0.102591	0.122215	0.118575	0.130483	0.140217	0.15121	0.148135	0.142037	0.145902	0.150108	0.124209	0.127295	0.122325	0.123962	0.127988	0.117167	0.147544	0.149028	0.133921	0.160254	0.160915	0.14863	0.139825	0.117918	0.105434	0.081292	0.080485
Matured (250℃, 24h)	Monera	Cyanophyceae	Nostoc punctiforme	cyanobacteria	cyanobacterial film	amelanotic	2	2	0.195276	0.196009	0.199329	0.200397	0.206542	0.20542	0.197462	0.195221	0.19629	0.188544	0.189581	0.182862	0.186761	0.189238	0.191399	0.201446	0.192373	0.187388	0.171231	0.160986	0.154901	0.162372	0.183714	0.213794	0.22048	0.22006	0.204	0.181525	0.170432	0.166881	0.159915	0.16411	0.168964	0.16931	0.164203	0.149971	0.158949	0.172498	0.17065	0.17652	0.183269
Matured (250℃, 24h)	Monera	Cyanophyceae	Nostoc punctiforme	cyanobacteria	cyanobacterial film	amelanotic	2	3	0.170728	0.180619	0.156526	0.157179	0.155224	0.174766	0.197698	0.207664	0.206355	0.221244	0.192365	0.188537	0.187608	0.194376	0.190188	0.195924	0.193946	0.199309	0.198593	0.19898	0.191877	0.174246	0.152689	0.173737	0.195494	0.206674	0.21359	0.209314	0.199589	0.178379	0.165364	0.170154	0.170244	0.166991	0.171086	0.166853	0.17062	0.173522	0.186884	0.176508	0.175553
Matured (250℃, 24h)	Monera	Cyanophyceae	Nostoc punctiforme	cyanobacteria	cyanobacterial film	amelanotic	3	1	0.273975	0.267145	0.26059	0.23957	0.232389	0.234394	0.261422	0.283487	0.275443	0.272871	0.2559	0.231663	0.208469	0.195402	0.201599	0.201927	0.203612	0.207528	0.215723	0.20733	0.208704	0.223887	0.226329	0.216444	0.210966	0.2009	0.208888	0.207005	0.220709	0.237333	0.248942	0.235131	0.233928	0.225179	0.211087	0.207884	0.20042	0.205849	0.212139	0.210536	0.19631
Matured (250℃, 24h)	Monera	Cyanophyceae	Nostoc punctiforme	cyanobacteria	cyanobacterial film	amelanotic	3	2	0.247087	0.235176	0.221035	0.226979	0.225149	0.206593	0.214784	0.211698	0.205524	0.210454	0.224723	0.230466	0.230827	0.228276	0.230837	0.206729	0.210537	0.199329	0.187943	0.184083	0.195727	0.199247	0.202211	0.211717	0.226091	0.228039	0.243207	0.242227	0.233987	0.209146	0.209587	0.195866	0.186861	0.202321	0.208027	0.209045	0.205193	0.204155	0.207192	0.203401	0.187326
Matured (250℃, 24h)	Monera	Cyanophyceae	Nostoc punctiforme	cyanobacteria	cyanobacterial film	amelanotic	3	3	0.158049	0.142999	0.130498	0.124802	0.115833	0.106982	0.098325	0.108238	0.100654	0.095245	0.110273	0.11728	0.120986	0.115168	0.115893	0.123568	0.111172	0.115212	0.118888	0.112046	0.104024	0.102335	0.104727	0.099029	0.094865	0.098236	0.08943	0.084097	0.090485	0.098098	0.098572	0.089057	0.096264	0.093957	0.09124	0.096898	0.107953	0.117093	0.12384	0.11686	0.117992
Matured (250℃, 24h)	Plantae	Trebouxiophyceae	Chlorella sp.	green algae	algal film	amelanotic	1	1	0.068367	0.069613	0.066467	0.063669	0.059983	0.063197	0.064883	0.063098	0.064494	0.068167	0.069246	0.066849	0.061492	0.058228	0.054868	0.055902	0.056153	0.057506	0.06369	0.061964	0.060255	0.057576	0.061603	0.064938	0.065044	0.066159	0.07207	0.068033	0.063745	0.060533	0.057405	0.057702	0.053325	0.052575	0.056284	0.06169	0.063237	0.061036	0.06186	0.06486	0.062961
Matured (250℃, 24h)	Plantae	Trebouxiophyceae	Chlorella sp.	green algae	algal film	amelanotic	1	2	0.055087	0.054214	0.052149	0.055683	0.054383	0.051624	0.051605	0.047911	0.050966	0.052476	0.049929	0.052244	0.054961	0.052547	0.054205	0.049987	0.050382	0.048595	0.04246	0.040133	0.046627	0.045532	0.050009	0.052901	0.053016	0.052786	0.0515	0.05085	0.055255	0.050979	0.051251	0.051219	0.04688	0.043578	0.043728	0.044079	0.045948	0.042155	0.037801	0.038626	0.038018
Matured (250℃, 24h)	Plantae	Trebouxiophyceae	Chlorella sp.	green algae	algal film	amelanotic	1	3	0.069208	0.065293	0.062113	0.057871	0.062514	0.066485	0.066978	0.067458	0.068229	0.064484	0.064158	0.066408	0.071111	0.069679	0.066912	0.06375	0.063439	0.063595	0.066716	0.066938	0.065329	0.056373	0.05741	0.054729	0.054843	0.055902	0.056117	0.054696	0.052383	0.048885	0.049367	0.049065	0.05254	0.057004	0.054964	0.053374	0.05226	0.055368	0.051416	0.051489	0.052051
Matured (250℃, 24h)	Plantae	Trebouxiophyceae	Chlorella sp.	green algae	algal film	amelanotic	2	1	0.055452	0.054902	0.049304	0.048041	0.047596	0.044374	0.042499	0.039045	0.040262	0.040649	0.041801	0.041738	0.046383	0.043085	0.036065	0.032624	0.033538	0.034309	0.040266	0.044277	0.044589	0.035507	0.030408	0.031216	0.031678	0.032466	0.0406	0.046629	0.042192	0.043826	0.045045	0.04283	0.038584	0.037984	0.03669	0.035123	0.029487	0.034966	0.032828	0.031512	0.028199
Matured (250℃, 24h)	Plantae	Trebouxiophyceae	Chlorella sp.	green algae	algal film	amelanotic	2	2	0.042196	0.045082	0.048575	0.048406	0.04725	0.050015	0.041152	0.037779	0.035041	0.039729	0.043024	0.042773	0.043521	0.043857	0.044446	0.04552	0.045264	0.047159	0.04589	0.046734	0.037758	0.032471	0.036241	0.039281	0.038185	0.03551	0.037058	0.038671	0.038301	0.037931	0.041604	0.041698	0.034755	0.033417	0.032688	0.034978	0.038038	0.034797	0.034796	0.035783	0.034028
Matured (250℃, 24h)	Plantae	Trebouxiophyceae	Chlorella sp.	green algae	algal film	amelanotic	2	3	0.058637	0.050312	0.051507	0.049354	0.048193	0.052085	0.047385	0.050034	0.051969	0.049716	0.05594	0.054079	0.056125	0.054876	0.050065	0.048889	0.045747	0.037107	0.031109	0.031901	0.034457	0.033108	0.037657	0.04365	0.046948	0.045265	0.041306	0.041096	0.035498	0.035792	0.035328	0.03591	0.038493	0.034128	0.031876	0.027484	0.028316	0.03598	0.042452	0.045713	0.049389
Matured (250℃, 24h)	Plantae	Trebouxiophyceae	Chlorella sp.	green algae	algal film	amelanotic	3	1	0.058469	0.057962	0.057621	0.047968	0.045613	0.043426	0.040652	0.04699	0.047191	0.041374	0.041902	0.044035	0.045674	0.046496	0.045622	0.045865	0.043643	0.033926	0.03659	0.041056	0.041358	0.039869	0.038313	0.039369	0.039115	0.039403	0.039714	0.041546	0.040969	0.041578	0.041284	0.042638	0.043842	0.044879	0.040078	0.03658	0.030347	0.029535	0.031134	0.036318	0.037938
Matured (250℃, 24h)	Plantae	Trebouxiophyceae	Chlorella sp.	green algae	algal film	amelanotic	3	2	0.066207	0.056815	0.054012	0.051953	0.054639	0.05215	0.052579	0.047465	0.048931	0.053729	0.049614	0.047381	0.057541	0.060072	0.057006	0.056992	0.058376	0.057206	0.049591	0.049823	0.062344	0.066785	0.070004	0.074821	0.068695	0.060035	0.048111	0.04022	0.03711	0.037634	0.043773	0.050356	0.054138	0.058864	0.060804	0.058081	0.050231	0.047689	0.047325	0.048036	0.050181
Matured (250℃, 24h)	Plantae	Trebouxiophyceae	Chlorella sp.	green algae	algal film	amelanotic	3	3	0.049617	0.050399	0.050709	0.05209	0.049299	0.047144	0.050174	0.04809	0.047507	0.046158	0.048047	0.048273	0.04068	0.041701	0.036564	0.031718	0.030553	0.031795	0.03647	0.04039	0.037129	0.03956	0.038961	0.044327	0.050815	0.051242	0.052406	0.050212	0.040939	0.034992	0.033956	0.040031	0.043483	0.041422	0.045722	0.044692	0.041297	0.04572	0.047961	0.051079	0.046616
Fossil (49 Ma; Bolca, IT)	Animalia	Actinopterygii	Mene rhombea	moonfish	melanosome film (abdomen)	melanin-rich	1	1	0.0243005	0.0212093	0.0194609	0.0183857	0.0158968	0.0125754	0.0105841	0.00842432	0.00701075	0.00638788	0.00655139	0.00643607	0.00684836	0.00696169	0.0072504	0.00645138	0.0067482	0.00750101	0.00713717	0.00738328	0.00882398	0.0113917	0.0139055	0.0133743	0.0141083	0.012694	0.00861722	0.00578303	0.00287395	0.00301188	0.00308438	0.00451853	0.00774974	0.00820738	0.00664933	0.00739589	0.00974678	0.0110529	0.00974307	0.00887504	0.00869785
Fossil (49 Ma; Bolca, IT)	Animalia	Actinopterygii	Mene rhombea	moonfish	melanosome film (abdomen)	melanin-rich	1	2	0.0165392	0.0165173	0.0165231	0.0177683	0.0161096	0.0129698	0.0100763	0.0092574	0.00764281	0.00640704	0.00594099	0.0069064	0.00878988	0.0102416	0.0102809	0.00975118	0.0086996	0.00779675	0.00724844	0.00637954	0.00710655	0.0098803	0.00955317	0.00726431	0.00609825	0.00623479	0.00490268	0.00360823	0.00283688	0.0046965	0.00332559	0.00320907	0.00463266	0.00640438	0.00649841	0.0085908	0.0103762	0.0113085	0.0101278	0.00877868	0.00745237
Fossil (49 Ma; Bolca, IT)	Animalia	Actinopterygii	Mene rhombea	moonfish	melanosome film (abdomen)	melanin-rich	1	3	0.0284175	0.0251563	0.0238472	0.0229967	0.0221572	0.0199634	0.017347	0.0151428	0.0137154	0.012818	0.0137615	0.0119092	0.0127732	0.0111763	0.0113267	0.010606	0.0104785	0.0110435	0.0125513	0.011528	0.0130243	0.0142027	0.0144027	0.0119204	0.0105221	0.00751132	0.00313416	0.000462437	0.00177871	0.0042854	0.00380792	0.00695073	0.00884163	0.00790198	0.0055906	0.00543604	0.00867651	0.00978318	0.00852099	0.0104697	0.0103634
Fossil (49 Ma; Bolca, IT)	Plantae	ND	ND	NA	plant fragment	amelanotic	1	1	0.117929	0.10789	0.103933	0.0993909	0.0917581	0.0814384	0.0718521	0.0593528	0.05436	0.049835	0.0523037	0.0517508	0.0559166	0.0549296	0.0534955	0.0442254	0.0439852	0.0437063	0.0483353	0.0506758	0.0564327	0.0642076	0.0676501	0.0571046	0.054585	0.0501837	0.0407659	0.0278944	0.017736	0.0165103	0.0126294	0.0155745	0.0237761	0.0285292	0.0277863	0.0291356	0.0375908	0.0413478	0.0374223	0.0378006	0.0356441
Fossil (49 Ma; Bolca, IT)	Plantae	ND	ND	NA	plant fragment	amelanotic	1	2	0.08214	0.0758991	0.0748959	0.0718529	0.0654418	0.056722	0.0482508	0.0397666	0.0345088	0.0326534	0.0377592	0.0384632	0.0406406	0.0403312	0.037289	0.030225	0.0280336	0.0278927	0.0324026	0.0330736	0.0372985	0.0445765	0.0477914	0.0401765	0.0406047	0.036624	0.0294746	0.0195242	0.0132911	0.0122325	0.00934479	0.0104311	0.0171795	0.0171323	0.0140234	0.0153913	0.0215291	0.0243301	0.0229123	0.0225463	0.023581
Fossil (49 Ma; Bolca, IT)	Plantae	ND	ND	NA	plant fragment	amelanotic	1	3	0.145651	0.13546	0.13234	0.12543	0.117083	0.104009	0.089789	0.0735465	0.0658489	0.0615121	0.0622743	0.0575538	0.0639622	0.064607	0.0607906	0.050858	0.0493133	0.0477113	0.0514064	0.0504537	0.0567342	0.0705343	0.0738101	0.0642422	0.0645939	0.0560486	0.0450209	0.0286653	0.0176527	0.0186873	0.0134359	0.0185133	0.0290052	0.0309205	0.0264873	0.026395	0.0374384	0.0397416	0.0388908	0.0408457	0.0442292
Fossil (10 Ma; Libros, SP)	Animalia	Aura	Pelophylax pueyoi	NA	melanosome film (abdomen)	melanin-rich	1	1	0.023268	0.021388	0.02195	0.020642	0.018399	0.016306	0.012797	0.007652	0.00574	0.005548	0.007643	0.008846	0.012445	0.014056	0.011669	0.009325	0.008958	0.009458	0.009452	0.010239	0.012236	0.012935	0.012132	0.010098	0.011574	0.012564	0.009829	0.007481	0.004127	0.000926	0.000275	0.002026	0.006464	0.009515	0.008025	0.009143	0.010378	0.008472	0.010738	0.012437	0.013123
Fossil (10 Ma; Libros, SP)	Animalia	Aura	Pelophylax pueyoi	NA	melanosome film (abdomen)	melanin-rich	1	2	0.027662	0.026615	0.025308	0.024604	0.023852	0.023321	0.021951	0.020043	0.017831	0.015437	0.013411	0.01223	0.012009	0.012585	0.013268	0.014102	0.014551	0.014906	0.01558	0.01705	0.018639	0.020241	0.021272	0.02129	0.019747	0.016691	0.013096	0.009725	0.006708	0.005067	0.005	0.005819	0.006941	0.008648	0.01057	0.011796	0.012846	0.013767	0.014504	0.014358	0.013343
Fossil (10 Ma; Libros, SP)	Animalia	Aura	Pelophylax pueyoi	NA	melanosome film (abdomen)	melanin-rich	1	3	0.028908	0.029933	0.029225	0.028948	0.02751	0.022923	0.018029	0.014654	0.011819	0.01041	0.010676	0.01063	0.014618	0.013854	0.013065	0.011162	0.010362	0.009963	0.011944	0.01229	0.015959	0.017783	0.019703	0.015905	0.014732	0.012056	0.009046	0.00627	0.005445	0.005813	0.007529	0.009713	0.016627	0.020571	0.020777	0.021331	0.021768	0.019123	0.014921	0.014323	0.015123
Fossil (10 Ma; Libros, SP)	Animalia	Aura	Pelophylax pueyoi	NA	melanosome film (abdomen)	melanin-rich	2	1	0.03455	0.032881	0.031691	0.029533	0.027195	0.023688	0.019702	0.013362	0.012567	0.013121	0.015119	0.015329	0.018729	0.020648	0.021654	0.01684	0.015288	0.012981	0.011889	0.01113	0.014366	0.018974	0.022928	0.019016	0.018088	0.015039	0.011879	0.008139	0.005196	0.004913	0.004867	0.006448	0.00897	0.00859	0.007525	0.008677	0.01312	0.016062	0.017446	0.018932	0.016547
Fossil (10 Ma; Libros, SP)	Animalia	Aura	Pelophylax pueyoi	NA	melanosome film (abdomen)	melanin-rich	2	2	0.051932	0.050089	0.046994	0.04353	0.041183	0.036884	0.030383	0.022987	0.01958	0.017375	0.019477	0.01912	0.023421	0.022869	0.021721	0.018105	0.018936	0.019138	0.019613	0.020418	0.023464	0.026591	0.028004	0.022931	0.02347	0.021134	0.013878	0.007953	0.003052	0.001324	0.000263	0.00292	0.009009	0.012645	0.011687	0.013823	0.018496	0.018122	0.019185	0.019864	0.019248
Fossil (10 Ma; Libros, SP)	Animalia	Aura	Pelophylax pueyoi	NA	melanosome film (abdomen)	melanin-rich	2	3	0.041959	0.040626	0.039836	0.037152	0.034488	0.029513	0.023991	0.018169	0.01794	0.01694	0.018449	0.017732	0.020941	0.019452	0.016885	0.013446	0.014679	0.015251	0.016164	0.017084	0.019154	0.021922	0.023913	0.020895	0.024033	0.02338	0.016772	0.01245	0.008955	0.008955	0.009197	0.010364	0.012984	0.014457	0.010654	0.011987	0.017225	0.019025	0.019441	0.017638	0.01657
Fossil (10 Ma; Libros, SP)	Animalia	Aura	Pelophylax pueyoi	NA	melanosome film (abdomen)	melanin-rich	3	1	0.044742	0.040453	0.038125	0.036352	0.034006	0.029595	0.025056	0.020566	0.018459	0.016267	0.017004	0.013551	0.014168	0.014494	0.015174	0.013327	0.015969	0.018213	0.02024	0.02016	0.02269	0.027912	0.030009	0.025008	0.026084	0.022832	0.013858	0.006878	0.003958	0.002048	0.000881	0.0051	0.011767	0.013671	0.012022	0.014849	0.019054	0.018072	0.018479	0.020171	0.018235
Fossil (10 Ma; Libros, SP)	Animalia	Aura	Pelophylax pueyoi	NA	melanosome film (abdomen)	melanin-rich	3	2	0.048151	0.046395	0.041528	0.037974	0.03354	0.031159	0.0262	0.020958	0.020174	0.024364	0.019308	0.016306	0.012212	0.016443	0.026614	0.030321	0.021493	0.017023	0.015831	0.019224	0.021926	0.022561	0.025972	0.030997	0.027586	0.018345	0.01347	0.008734	0.004677	0.002095	0.004611	0.008591	0.015744	0.013633	0.014285	0.014008	0.014766	0.022756	0.027473	0.019426	0.013223
Fossil (10 Ma; Libros, SP)	Animalia	Aura	Pelophylax pueyoi	NA	melanosome film (abdomen)	melanin-rich	3	3	0.040198	0.038253	0.037329	0.0382	0.037523	0.034651	0.026019	0.019579	0.015685	0.011276	0.012178	0.01451	0.020999	0.023702	0.023167	0.022486	0.02016	0.017938	0.016861	0.015823	0.017682	0.020371	0.023855	0.021457	0.021005	0.021353	0.016229	0.012716	0.009705	0.009834	0.007596	0.006112	0.006741	0.008334	0.007275	0.010286	0.016729	0.018671	0.017857	0.019293	0.01982
Fossil (10 Ma; Libros, SP)	Plantae	ND	ND	NA	plant fragment	amelanotic	1	1	0.010202	0.009072	0.009708	0.010091	0.010255	0.010156	0.011737	0.012013	0.010387	0.010127	0.011296	0.009948	0.009681	0.008622	0.009281	0.009386	0.008702	0.009238	0.009888	0.009534	0.008957	0.008481	0.007959	0.007302	0.00858	0.00928	0.009931	0.010959	0.011797	0.010459	0.009275	0.008197	0.008247	0.006036	0.006904	0.007177	0.008588	0.010621	0.012978	0.014865	0.014629
Fossil (10 Ma; Libros, SP)	Plantae	ND	ND	NA	plant fragment	amelanotic	1	2	0.025632	0.025546	0.023663	0.021166	0.017615	0.016558	0.016347	0.01734	0.016871	0.017677	0.014693	0.012063	0.013146	0.014132	0.013647	0.012925	0.010873	0.010293	0.009884	0.011714	0.015965	0.018828	0.020291	0.018206	0.01754	0.015359	0.012895	0.011753	0.011333	0.012452	0.013021	0.014557	0.015906	0.014513	0.013856	0.014685	0.014697	0.014954	0.014064	0.016373	0.01573
Fossil (10 Ma; Libros, SP)	Plantae	ND	ND	NA	plant fragment	amelanotic	1	3	0.081461	0.075064	0.069163	0.069252	0.06263	0.055586	0.053186	0.047425	0.041998	0.039956	0.038858	0.040276	0.040933	0.039559	0.034806	0.025195	0.019616	0.017573	0.017845	0.020639	0.027578	0.038423	0.04134	0.039408	0.042406	0.040794	0.025402	0.014094	0.004812	0.004691	0.006336	0.013248	0.020957	0.025224	0.019864	0.018361	0.017698	0.017834	0.018234	0.016127	0.014159
Fossil (10 Ma; Libros, SP)	Plantae	ND	ND	NA	plant fragment	amelanotic	2	1	0.022622	0.018332	0.015665	0.014498	0.015657	0.01786	0.017955	0.018283	0.01855	0.01709	0.012819	0.009952	0.013213	0.01285	0.011745	0.011817	0.01108	0.012939	0.012213	0.011801	0.015767	0.017307	0.01699	0.015149	0.01328	0.013563	0.010321	0.005212	0.00252	0.002431	0.00368	0.006725	0.007428	0.011562	0.011871	0.012666	0.015309	0.019912	0.023115	0.021925	0.019203
Fossil (10 Ma; Libros, SP)	Plantae	ND	ND	NA	plant fragment	amelanotic	2	2	0.036218	0.034447	0.033279	0.030006	0.027959	0.022863	0.020284	0.014481	0.01184	0.00836	0.007822	0.010079	0.016837	0.017311	0.019495	0.018674	0.018361	0.018162	0.019374	0.020059	0.020887	0.020642	0.022375	0.019066	0.017307	0.01583	0.014983	0.01004	0.009598	0.011378	0.014141	0.014895	0.015168	0.016921	0.016824	0.01913	0.022638	0.022546	0.026959	0.027567	0.028497
Fossil (10 Ma; Libros, SP)	Plantae	ND	ND	NA	plant fragment	amelanotic	2	3	0.014378	0.014012	0.011779	0.010821	0.010221	0.00999	0.008296	0.008854	0.012295	0.012658	0.012192	0.01148	0.012988	0.010612	0.00873	0.009352	0.010677	0.008193	0.007088	0.006075	0.009458	0.013391	0.01339	0.013634	0.012744	0.007765	0.004459	0.001485	0	0.003114	0.00473	0.007912	0.006914	0.006691	0.008712	0.011404	0.011612	0.01252	0.016899	0.017229	0.010953
Fossil (10 Ma; Libros, SP)	Plantae	ND	ND	NA	plant fragment	amelanotic	3	1	0.007569	0.007105	0.00551	0.004448	0.004561	0.003853	0.004044	0.004212	0.004123	0.004596	0.004796	0.004599	0.005321	0.005741	0.006442	0.006973	0.007797	0.008681	0.007827	0.006197	0.005393	0.005185	0.005681	0.005887	0.007188	0.008058	0.007502	0.006776	0.006541	0.00605	0.005288	0.004247	0.003789	0.003571	0.003051	0.0039	0.005655	0.006572	0.006857	0.006329	0.007139
Fossil (10 Ma; Libros, SP)	Plantae	ND	ND	NA	plant fragment	amelanotic	3	2	0.007084	0.006253	0.00602	0.005483	0.005382	0.006166	0.005297	0.004795	0.003981	0.003697	0.004148	0.004903	0.006628	0.007388	0.007009	0.007512	0.006037	0.003866	0.003351	0.003564	0.004268	0.005104	0.006061	0.006926	0.006907	0.005068	0.004911	0.005664	0.005686	0.005677	0.005333	0.005795	0.005085	0.003764	0.004039	0.005372	0.007259	0.007551	0.008894	0.00908	0.007904
Fossil (10 Ma; Libros, SP)	Plantae	ND	ND	NA	plant fragment	amelanotic	3	3	0.009951	0.009475	0.008704	0.007958	0.007568	0.00726	0.006666	0.005682	0.005505	0.004345	0.004367	0.004802	0.006114	0.006161	0.005812	0.005763	0.00577	0.005576	0.006249	0.006684	0.007597	0.008061	0.008483	0.00799	0.008265	0.008372	0.007367	0.005426	0.004097	0.003001	0.002398	0.002765	0.00347	0.004636	0.005189	0.005199	0.00631	0.006496	0.006254	0.005833	0.005281
Fossil (10 Ma; Libros, SP)	Animalia	Aves	Anatidae indet.	NA	melanosome film (feather)	melanin-rich	1	1	0.06884	0.061676	0.057468	0.056349	0.056046	0.05163	0.040859	0.032027	0.026609	0.019536	0.021884	0.020282	0.02592	0.024382	0.026389	0.025029	0.027321	0.028502	0.029576	0.029366	0.033381	0.038714	0.045554	0.03893	0.041743	0.036261	0.023539	0.013744	0.006002	0.006939	0.007658	0.011524	0.018939	0.021054	0.016845	0.017567	0.022648	0.023968	0.024861	0.027168	0.029101
Fossil (10 Ma; Libros, SP)	Animalia	Aves	Anatidae indet.	NA	melanosome film (feather)	melanin-rich	1	2	0.053186	0.049844	0.047282	0.04306	0.041334	0.036006	0.029682	0.024738	0.019014	0.017649	0.017897	0.018088	0.022582	0.021759	0.022859	0.018307	0.015818	0.015504	0.015919	0.01699	0.02065	0.024171	0.026766	0.022625	0.021002	0.016644	0.008396	0.003013	0.000347	0.001355	0.004595	0.008124	0.010529	0.012287	0.010564	0.012515	0.014994	0.01487	0.01446	0.01372	0.012253
Fossil (10 Ma; Libros, SP)	Animalia	Aves	Anatidae indet.	NA	melanosome film (feather)	melanin-rich	1	3	0.037443	0.035062	0.035771	0.033704	0.034477	0.035431	0.033253	0.02795	0.025322	0.021329	0.021063	0.019151	0.021281	0.021201	0.019222	0.014464	0.012656	0.00993	0.010418	0.011296	0.014264	0.019327	0.022552	0.021429	0.024449	0.023283	0.018547	0.01162	0.006249	0.003654	0	0.002734	0.008763	0.011317	0.011337	0.012963	0.014422	0.013775	0.01262	0.012066	0.011658
Fossil (10 Ma; Libros, SP)	Animalia	Aves	Anatidae indet.	NA	melanosome film (feather)	melanin-rich	2	1	0.069854	0.066301	0.065898	0.063348	0.0608	0.055726	0.045709	0.03488	0.029984	0.023812	0.019587	0.014801	0.017738	0.018079	0.017603	0.017345	0.020476	0.020196	0.019992	0.020901	0.025362	0.030169	0.031937	0.028598	0.030272	0.026802	0.022711	0.017558	0.014043	0.011463	0.008268	0.009573	0.013497	0.014159	0.015552	0.017566	0.023846	0.023527	0.02145	0.019237	0.017088
Fossil (10 Ma; Libros, SP)	Animalia	Aves	Anatidae indet.	NA	melanosome film (feather)	melanin-rich	2	2	0.344449	0.342076	0.34372	0.346886	0.338886	0.318147	0.290377	0.258578	0.25148	0.246472	0.259486	0.268918	0.291504	0.29573	0.291405	0.267558	0.261318	0.262747	0.273926	0.283455	0.304357	0.330271	0.344098	0.321042	0.316176	0.307235	0.275531	0.243691	0.233786	0.234981	0.237707	0.252738	0.275294	0.291652	0.280592	0.284659	0.309387	0.305768	0.30362	0.302279	0.297181
Fossil (10 Ma; Libros, SP)	Animalia	Aves	Anatidae indet.	NA	melanosome film (feather)	melanin-rich	2	3	0.105752	0.100364	0.102084	0.098142	0.093103	0.079561	0.063757	0.049199	0.046212	0.042672	0.047289	0.043679	0.047573	0.047542	0.043025	0.037474	0.039919	0.0398	0.042376	0.041038	0.0474	0.057516	0.060847	0.051344	0.048675	0.042048	0.025999	0.012745	0.008457	0.010182	0.011489	0.019517	0.027527	0.029565	0.020755	0.022367	0.03174	0.032566	0.029564	0.032896	0.031334
Fossil (10 Ma; Libros, SP)	Plantae	ND	ND	NA	plant fragment	amelanotic	4	1	0.027159	0.026019	0.027759	0.028682	0.026108	0.023756	0.018361	0.013264	0.01193	0.010897	0.012492	0.013307	0.016343	0.019102	0.018458	0.015583	0.014686	0.012605	0.012628	0.013417	0.016128	0.021036	0.022194	0.019877	0.019975	0.017217	0.014479	0.011023	0.009803	0.009516	0.008849	0.011164	0.012232	0.011078	0.009201	0.008915	0.010556	0.010228	0.010382	0.011346	0.010958
Fossil (10 Ma; Libros, SP)	Plantae	ND	ND	NA	plant fragment	amelanotic	4	2	0.03078	0.030783	0.033159	0.034362	0.032899	0.029267	0.021719	0.015626	0.011145	0.009885	0.012332	0.011965	0.01564	0.01641	0.015766	0.016566	0.016155	0.01478	0.013977	0.011184	0.012568	0.01351	0.016625	0.017246	0.018545	0.017947	0.014603	0.010802	0.007714	0.005333	0.004265	0.004869	0.008066	0.008481	0.007737	0.00864	0.012998	0.01439	0.014883	0.017139	0.01797
Fossil (10 Ma; Libros, SP)	Plantae	ND	ND	NA	plant fragment	amelanotic	4	3	0.022102	0.021681	0.022828	0.023126	0.02041	0.017718	0.016257	0.013792	0.014453	0.013417	0.012545	0.010671	0.009188	0.008097	0.008278	0.007349	0.010774	0.011091	0.010727	0.010304	0.011681	0.013326	0.01364	0.011231	0.013026	0.011419	0.008742	0.00681	0.005491	0.004452	0.002475	0.00374	0.005721	0.006097	0.006994	0.008771	0.009787	0.007956	0.007008	0.007399	0.006481
Fossil (10 Ma; Libros, SP)	Plantae	ND	ND	NA	plant fragment	amelanotic	5	1	0.078575	0.073785	0.071685	0.071511	0.067588	0.057817	0.049128	0.038776	0.034633	0.031761	0.032143	0.03233	0.037361	0.035063	0.034092	0.029617	0.02826	0.027573	0.026004	0.02744	0.032733	0.037253	0.041557	0.034883	0.03613	0.033612	0.024436	0.013768	0.00748	0.007829	0.010019	0.012275	0.020933	0.021653	0.020382	0.020028	0.027002	0.029523	0.030916	0.029128	0.027958
Fossil (10 Ma; Libros, SP)	Plantae	ND	ND	NA	plant fragment	amelanotic	5	2	0.105986	0.098288	0.096365	0.094564	0.08997	0.077988	0.063644	0.049321	0.042091	0.041405	0.046392	0.046079	0.05697	0.056281	0.05521	0.047945	0.046454	0.043483	0.043846	0.045987	0.054761	0.064182	0.071625	0.059043	0.057374	0.046484	0.029957	0.017091	0.008684	0.009201	0.009514	0.012243	0.022532	0.026392	0.023194	0.028338	0.039758	0.0431	0.04375	0.04381	0.042878
Fossil (10 Ma; Libros, SP)	Plantae	ND	ND	NA	plant fragment	amelanotic	5	3	0.088996	0.081333	0.07774	0.077027	0.071686	0.065024	0.051533	0.040944	0.036196	0.034347	0.03705	0.03764	0.045967	0.048384	0.045886	0.042184	0.043626	0.041031	0.036816	0.035435	0.040164	0.045061	0.04859	0.041828	0.046175	0.04311	0.032484	0.023189	0.017145	0.014183	0.011365	0.015773	0.024393	0.028927	0.027293	0.033435	0.041904	0.043267	0.042394	0.043034	0.039155
[truncated: 631 more columns]
