# Supplementary material for: A new non-destructive method to decipher the origin of organic matter in fossils using Raman spectroscopy
Source: Royal Society of Chemistry journal article supplement (doi:10.1039/d4ra04364b), 2024-01-01
Supplement: d4ra04364b6.xlsx [file d4ra04364b6.xlsx]

## Sheet: DataS3
Dataset S3 - LDA loadings for the chemospace shown in Fig. 2A. LD1 and LD2 loadings are represented as line plots in Fig. S6.
wavenumber	LD1	LD2	LD3	LD4	LD5	LD6	LD7	LD8	LD9	LD10	LD11	LD12	LD13	LD14	LD15	LD16	LD17
900.314	93.9253	33.6598	-20.885	11.1082	-21.442	8.47156	17.2119	-0.222449	8.61445	-12.1465	9.15478	-34.6887	2.06225	-2.18266	9.9792	-18.5563	14.7152
902.072	83.4732	22.6442	-14.6653	2.5888	-25.9833	12.6028	12.4152	1.32579	11.0483	-7.81395	2.76788	-27.5229	-5.78078	-0.281484	10.0506	-24.6807	2.78797
903.832	33.2763	1.5333	1.0131	1.52369	-6.06708	13.5633	5.69273	6.41355	9.712	-5.80674	-9.2851	-9.06236	-1.49221	0.776823	3.62428	-13.2252	-1.73103
905.59	8.53208	-1.77277	3.76359	-2.46452	-12.3214	14.2419	10.539	2.00187	2.85919	0.800763	-8.06195	-0.154951	3.57705	6.00507	-0.504129	-3.32301	-2.00277
907.35	-5.39323	6.24582	1.79588	14.7742	-10.956	16.5915	4.45351	-12.0881	4.47783	1.37731	-2.67618	-9.3228	3.59246	11.0531	-0.0863198	-5.34496	-7.30642
909.107	-21.4219	4.07036	3.14977	15.7791	-4.07434	12.156	-2.82704	-11.4209	1.19284	-8.33284	2.56845	-1.89431	6.98077	12.6047	-4.2918	-0.386903	-2.99504
910.863	-50.7849	-1.36825	-4.20984	17.8826	-2.26969	18.0763	-7.51389	-16.7697	-1.68432	-5.82852	1.77403	4.29128	9.793	13.3811	-5.16893	-1.86418	-4.75267
912.621	-44.5934	-2.64311	-11.152	10.1213	-16.0827	20.3216	-10.5271	-7.6955	-7.71552	-7.80915	1.94801	3.94474	8.81586	14.4931	-2.60376	-8.61134	-6.21767
914.377	-33.491	-2.23912	-12.0404	1.45185	-29.3637	17.2769	-8.17075	-3.98212	-5.01277	-3.57162	0.974805	0.389687	10.2157	8.48797	6.04753	-7.67734	-4.4066
916.135	-6.05821	-0.180107	-9.13532	-1.04337	-19.0798	7.55929	-10.5994	0.457002	2.34713	-2.39053	10.4127	-12.3406	3.4797	3.87474	9.509	-8.67005	-6.07338
917.891	17.1429	-3.05541	3.75222	-2.33723	-8.9816	-0.135113	-3.97067	14.528	8.46209	-1.2736	6.26524	-3.72866	7.7198	-1.27579	6.97365	-0.92984	-9.28153
919.645	48.3081	11.7918	-2.50237	4.62641	-12.1461	-2.04417	8.4618	13.9883	11.8842	2.294	5.74211	-12.1787	2.37441	-0.381237	8.82089	-2.18062	-6.60099
921.4	94.1135	28.5801	-0.560176	7.77369	-11.4607	-14.4081	13.0405	10.2209	12.9341	-4.32579	2.06465	-19.5384	-2.08373	5.54812	5.50245	-0.917822	-2.78164
923.156	45.5224	20.15	10.8129	1.49178	3.74495	-12.1562	13.6159	10.1049	12.2707	-11.104	-1.33307	-8.67392	3.1006	1.31903	3.06537	4.94481	5.67262
924.91	23.3878	15.1474	5.00747	5.68036	6.79226	-3.11741	14.4154	0.660808	5.14689	-6.85584	-11.5787	-1.52542	6.97503	0.831024	-1.07941	-3.03527	3.56167
926.664	42.6558	12.603	8.25003	-3.24359	-4.96352	-2.66349	17.3735	3.93792	-2.86531	-4.4574	-19.0305	3.23017	5.53873	5.43757	-7.19112	0.77027	2.78478
928.418	39.802	2.15925	12.1392	-5.00805	-10.627	-5.68755	5.07668	12.0983	-9.75843	-3.8564	-16.7196	7.24639	4.07646	3.9486	-8.67988	5.01841	7.79005
930.17	32.4883	-4.37581	5.68404	-6.34258	-6.72083	-1.85314	-3.7144	7.21261	-8.46462	5.18106	-8.54174	-3.73883	-3.70347	0.716257	2.67459	3.54431	0.810365
931.924	39.0046	-9.11977	3.75327	-4.10016	-6.26727	-2.0182	-1.72851	8.84952	-2.28461	13.4348	-11.4007	3.28627	-8.31716	4.41025	-4.54974	3.38235	-6.41013
933.676	28.7729	-10.8315	-7.1075	9.03846	-9.53089	6.71386	1.21096	8.50662	-1.50131	16.3714	-11.969	6.9085	-11.1741	8.96174	-5.01697	12.472	-6.97502
935.428	72.5699	0.430171	-9.74306	6.2667	-10.5684	-0.489446	3.50718	10.6741	2.84179	7.28442	-11.4851	0.477483	-22.588	15.6705	-4.74106	14.2394	-4.80293
937.18	43.7366	6.73156	-3.40699	-13.3889	-6.93043	-1.03449	2.23797	6.07689	5.7431	1.61674	0.375771	2.47392	-22.2026	14.0786	-5.42787	11.1113	-1.56263
938.932	25.0448	5.93713	-6.771	-20.2664	9.87124	-12.4555	8.79802	5.95737	2.86267	-2.34815	-12.8312	19.9671	-16.4476	9.32571	-19.4318	15.6312	2.99542
940.684	55.8324	14.6473	-1.91925	-28.4841	5.29554	-19.4901	16.9547	1.21547	8.62688	-0.396434	-15.0953	15.4233	-16.6505	5.13977	-21.2032	16.435	10.9983
942.434	-29.3319	7.09301	0.476532	-13.5113	7.69754	-1.69076	2.98446	-3.5541	0.0277805	-10.9326	1.06193	18.4788	-0.145032	-0.504549	-15.9597	6.18596	9.71078
944.184	-56.7784	7.47125	0.789886	-7.42911	2.26809	7.94643	-3.22764	-18.1227	-1.28862	-10.5176	3.48657	8.50531	1.18973	-0.70185	-4.05167	-1.29499	6.71251
945.934	-63.3356	1.96708	-5.02101	2.38674	8.50985	1.67541	-3.4488	-5.22743	0.864939	-8.0127	3.94428	4.63286	2.53971	-1.30892	-11.0476	-4.93739	8.63333
947.684	-100.219	-12.2516	-0.539454	17.4616	6.20277	11.3226	-13.194	1.93014	-0.349048	-14.1626	6.14357	2.10453	11.2339	-4.97552	-5.6158	-9.53583	3.92061
949.432	-66.7633	-3.3786	-11.9068	14.1953	8.43878	0.813792	-8.96295	7.85878	-0.174545	-11.9395	5.21626	-6.58708	0.88691	-4.80105	-8.73262	-14.8092	-0.512623
951.182	-37.8494	2.838	-8.85962	-2.98194	1.92409	-7.38558	-8.23941	9.07608	1.74925	-10.1331	1.93074	-9.28868	-5.14639	-6.28932	-2.79311	-7.99035	6.60771
952.93	-50.8097	-6.30607	-14.9142	3.32019	4.5396	-2.30717	-6.7784	8.78833	-2.22053	-2.69503	-10.249	-2.03832	-4.87289	-5.71781	-1.37362	-4.94968	-0.763768
954.678	-47.911	-9.49384	-1.8013	1.25261	-2.49245	7.57642	-7.85067	5.3445	-5.86972	-4.70985	-13.1703	0.719716	-1.18227	-10.3184	2.37408	-4.45891	-1.886
956.426	-116.639	-19.0044	-6.1121	13.5775	-8.39678	32.6659	-14.8584	-3.42922	-8.24496	-3.58851	-7.03719	0.575991	7.5672	-15.2058	15.0884	-7.14295	-11.0987
958.172	-54.0526	-14.4251	-0.43006	1.01966	-14.6138	23.6601	-7.06647	-2.57209	-7.87823	-4.98283	-7.94999	2.49821	-4.59487	-11.0427	7.14031	-4.23685	-5.41004
959.92	-13.7197	-10.5235	-10.4162	-1.96427	-14.7278	8.28813	-4.65293	2.10146	4.32469	-1.56944	2.24764	-8.52251	-12.0127	-4.48623	5.3211	3.19345	-3.41474
961.666	-63.3364	-19.9098	-1.14483	7.35663	-10.5672	12.2268	-6.86823	-10.7775	7.01638	-2.42706	6.01909	7.676	4.15951	0.938078	-1.49358	4.08328	-12.9066
963.412	-31.4386	-20.248	-5.93631	7.28193	-8.45673	-2.7993	3.8821	0.867338	0.734336	5.92912	-3.99328	10.1126	0.404296	2.12105	-7.66669	5.19226	-16.6966
965.158	-19.0104	-16.837	-1.83567	-2.18913	-15.0438	-10.2883	6.93682	2.58121	3.39465	3.74747	-1.42445	16.2013	14.6055	6.08057	-8.06166	20.9255	-3.43736
966.902	-27.6393	-14.7808	-4.23503	9.41829	-20.3993	-2.07843	7.02543	2.53779	-2.5444	7.93333	3.19683	15.7347	26.1835	9.36951	-9.44047	16.4373	-8.94323
968.648	-33.1458	-16.198	2.13058	-4.59694	-14.8162	0.638311	6.2896	11.3122	-4.88314	4.05592	-3.76784	17.408	20.2276	3.53525	-8.03286	8.2555	-3.58955
970.393	-53.0898	-15.7793	-9.36297	-7.80744	-26.2235	7.16126	3.13978	7.16711	-0.740034	11.6812	-6.33296	10.9523	16.4633	-1.91261	-4.28348	-2.19614	-7.03883
972.137	0.90812	-11.2376	-11.708	-2.99414	-27.4192	8.57657	-0.809509	10.3276	-0.551002	6.87518	-9.2962	2.11239	-6.77494	1.10091	-7.20935	-10.7215	-1.63382
973.881	6.70454	-4.46472	-9.9052	9.99229	-12.2058	6.21252	-9.01832	0.557929	9.08174	6.75654	-5.16261	-8.48634	-15.3209	-1.8547	-4.66221	-9.70941	2.50392
975.625	-11.2826	-6.99435	-2.39086	22.6085	-0.747628	7.83446	-8.54222	-8.18008	2.01799	10.1499	-9.1379	-3.49931	-9.03755	-0.503653	-11.4748	-8.15852	-0.321693
977.367	60.8183	-10.287	2.5666	20.0116	-0.0801577	5.18529	-8.5667	3.84684	-4.72788	6.42398	-10.0828	-9.56075	-23.3802	-2.34583	-15.9409	-17.5207	3.1803
979.111	26.5245	-10.1066	7.29383	21.5573	6.55021	8.3673	-10.091	-7.33521	-4.18644	2.36328	1.96719	-2.66952	-4.43355	5.49671	-11.6676	-2.53754	1.6977
980.854	48.1055	0.889646	14.5542	15.4433	-3.55274	4.84734	-2.5474	-4.97611	-6.47113	-0.217857	-0.860767	-4.98953	9.41117	5.4064	1.6711	-0.578053	1.84816
982.596	36.5849	-2.48107	11.6844	2.53403	-11.0296	10.6567	4.31146	-4.93726	-0.299925	2.92925	-3.21194	-3.3818	9.09889	2.96745	11.4429	-3.33241	-6.11435
984.336	5.04513	-9.10024	13.3698	2.13632	-17.44	13.1492	2.5025	-6.47311	-3.12524	4.00403	-1.23744	-2.35391	19.6837	5.33114	16.1825	1.04239	-14.8337
986.078	-11.2371	-17.5851	3.39003	4.00714	-15.942	16.8658	-3.03716	-1.55299	-6.6398	1.69703	-0.00123832	0.338283	8.90372	8.3999	8.39069	-3.16543	-14.8027
987.818	-27.545	-12.6091	-0.294706	3.08309	-5.37576	14.4254	-1.2977	-5.63758	-1.1492	3.60436	6.07527	-3.0649	0.722578	-0.231121	3.01402	-7.87513	-12.926
989.561	-34.5857	-11.3307	-4.89792	1.99846	4.77574	2.05256	-0.517446	1.79591	-3.86213	3.8656	2.36043	-4.40298	-0.815248	-5.23067	-2.52842	2.95333	-2.67264
991.299	13.4489	-3.76737	-9.94485	-2.1671	-2.36911	-2.79714	0.890857	1.37485	-2.182	9.76581	3.37688	-13.3925	-8.93362	-8.43338	-2.38791	-1.00903	4.42204
993.039	-3.21993	-2.78745	-13.0886	-1.42355	-6.12174	-4.10565	0.498291	-5.17303	-1.79764	20.4248	-0.311625	-12.1388	-3.18091	-10.0447	0.985587	7.23721	5.46595
994.779	2.43001	0.846508	-7.9676	-9.88664	-5.44475	-7.71694	1.51227	1.1871	1.72744	12.5219	-5.35944	-15.6923	-2.35716	-17.0276	7.15431	-1.37875	11.6287
996.518	-3.88161	-1.04083	1.72624	-9.91605	9.66982	-12.0809	1.85265	8.41156	6.21162	1.94987	-5.25886	-13.1803	-2.90002	-13.6115	2.10265	-1.15368	11.1972
998.258	-32.6395	-5.8235	16.226	2.05596	26.6687	-9.20437	-2.00731	9.45568	3.82535	-2.26116	-6.28285	-13.7234	6.63705	-11.4336	2.44598	0.894839	8.80527
999.996	-2.16245	1.23526	20.002	4.01551	34.1677	-9.15227	-0.962442	8.60548	2.61329	-11.6549	-12.1763	-15.1227	-0.535327	-5.45254	2.91055	-1.9188	10.0948
1001.73	36.4177	15.9211	24.0584	2.05641	36.1019	-14.0991	1.7325	8.01032	2.49813	-22.6601	-7.88529	-19.0628	-3.47906	-1.85782	6.04149	-3.76712	11.3173
1003.47	52.6207	21.9261	25.9319	-0.0541755	36.257	-18.6023	6.03759	10.492	2.63367	-23.1714	-10.4021	-11.3695	0.600568	-1.20487	-0.33614	-1.17597	10.8781
1005.21	64.9298	29.334	21.1609	6.36648	17.504	-6.27059	6.84116	-4.69761	2.72213	-13.367	-5.09394	-20.6197	0.855354	2.86116	5.4607	-8.87408	5.27349
1006.95	61.2924	27.6938	9.86769	2.29741	3.69406	-4.96124	7.25201	-6.99025	-1.07827	-4.41975	-3.75177	-18.1583	-0.793553	2.16006	3.30645	-6.5078	5.8209
1008.68	41.7295	12.4103	13.4183	-2.68207	5.39054	-5.91616	0.961637	3.85752	-1.92749	-2.97943	-1.00816	-11.0196	-1.64549	-2.93222	0.938054	-8.46986	5.95148
1010.42	-7.4601	-7.09024	18.6617	7.2293	8.8218	3.55299	-6.71046	5.45055	-8.38095	-0.471908	2.24263	1.10042	6.60685	1.09998	-1.34093	3.95401	1.21999
1012.15	-9.23869	-13.1504	16.4813	6.97838	0.781237	9.88975	-4.34976	0.0500926	-6.36601	10.5457	-1.44971	3.824	1.76069	0.345467	-2.19352	3.64393	0.491856
1013.89	13.6843	-13.1066	11.7757	-9.14832	0.212865	9.8083	-0.0454041	-3.73485	-1.47263	12.1115	0.321828	5.88569	-11.6448	0.879458	-3.40581	-5.62879	-2.36416
1015.62	21.743	-11.5793	6.57756	-12.7472	2.62076	3.80317	-0.612375	3.15962	-1.38192	1.39074	4.87667	7.66262	-15.5612	1.21624	-6.37677	-9.76316	2.25923
1017.36	15.3118	-9.98432	7.00157	-12.3191	6.29543	4.38696	2.87556	6.43935	1.15716	-7.30377	8.96133	15.3944	-8.33383	3.00809	-12.0378	-6.77426	3.87983
1019.09	11.5389	0.0743069	-1.9205	-2.82437	-3.91584	7.8115	-3.7833	-0.129509	-0.997919	-9.70209	17.8906	4.11889	-0.793245	1.20231	-1.92942	-9.55597	2.06463
1020.83	-10.0732	3.58098	-17.295	3.5396	-9.64845	6.40919	-1.64182	-0.87195	-2.18667	-7.06326	17.2352	2.10556	6.23815	3.00976	3.3754	-2.70018	4.81453
1022.56	-30.2897	-1.76389	-15.1716	4.59427	-8.57782	0.942455	-7.41097	5.43625	-4.5455	-2.1356	10.2162	6.73532	16.0768	-2.96569	3.52064	2.51986	5.54676
1024.29	-6.73443	4.10167	-7.04118	8.30318	-14.9623	7.09751	-10.5575	-2.41711	-3.22046	-1.4406	10.5393	-1.27199	14.8862	0.310044	6.65484	1.54644	2.59956
1026.03	47.9558	9.62187	-7.06467	-1.29108	-16.1908	1.88643	-6.68441	-0.15323	0.575382	-2.79925	2.83517	-3.81079	0.300759	0.722412	2.28809	-0.577258	3.60461
1027.76	34.8099	3.96069	0.470747	-2.32219	3.33895	2.12169	-8.48301	-9.02558	0.582671	-4.76076	2.41371	-0.57515	-2.3046	3.38292	1.53153	-3.35569	-7.85918
1029.49	95.4959	12.6374	8.64435	-11.0828	5.28949	-21.5327	1.31159	7.38405	-0.95721	-10.7315	-9.16402	5.69835	-4.79212	-2.77683	-5.29652	2.89701	3.50631
1031.22	54.5341	10.5827	12.2097	-18.2436	-1.02857	-13.5405	7.60105	-2.79242	1.12663	-1.49088	-1.27875	15.6664	1.18033	2.74263	-6.65166	9.27414	-3.35675
1032.95	14.4442	8.19113	-0.951247	-3.43339	-1.53757	-6.84696	-0.0570452	-3.80824	0.0320926	5.09501	8.33659	6.4226	4.24936	0.636831	0.0676358	9.89556	-5.87863
1034.68	7.89313	15.757	-10.7465	-7.83945	-7.57231	-10.7933	10.5919	-12.6503	2.92803	15.698	12.1464	10.4641	7.17736	7.65196	-0.28328	19.4001	-4.51635
1036.41	4.56093	5.67894	-8.99462	-15.4924	-6.25814	-15.0085	2.21485	-4.37678	2.88509	19.7492	13.4627	10.8991	-1.64999	4.41349	-0.485904	15.4908	-1.32439
1038.14	43.7799	8.58493	-3.25997	-14.6787	-6.32787	-13.4405	1.76427	2.16447	3.95339	17.0683	16.2637	-2.2635	-12.4779	3.13579	0.489938	6.94378	0.22672
1039.88	28.0441	0.577106	-5.66382	-17.6331	8.92994	-10.4481	-2.02758	7.82637	-0.607176	7.6263	13.6467	0.639045	-22.7851	0.0362157	-1.88435	-0.128263	-2.2156
1041.6	31.7289	4.85943	6.87957	-10.3999	19.0484	-15.5544	1.84873	5.97945	-6.19668	5.15254	4.48926	8.08779	-15.4308	0.815163	-0.273799	9.23339	-3.7121
1043.33	20.7245	-3.0141	21.3313	-10.509	11.4579	-9.01159	1.61146	9.21938	-5.67178	0.570997	-3.61167	10.2497	-6.0793	-5.08579	7.00491	12.8447	-4.78593
1045.06	2.35647	-2.12332	16.4209	-12.1768	-10.7695	5.00695	2.16975	-2.69481	-0.657683	2.47543	1.17123	11.0662	-3.59308	-6.40888	10.964	0.21321	-13.1155
1046.79	-31.6898	-2.24617	7.46649	6.10254	-14.9687	16.7295	-0.488543	-4.28535	3.17196	1.57226	1.34493	4.90542	3.00689	-11.2524	8.60041	-8.0666	-12.6292
1048.52	-3.8979	5.26133	1.22867	1.01995	-15.0533	9.13781	10.2461	-8.94509	4.02022	0.136161	-2.32406	2.96551	1.07969	-8.85035	6.03745	-3.66187	-4.18617
1050.25	-0.077388	-8.41143	3.76024	-0.331105	-15.2395	7.62893	6.04815	-4.86878	1.94119	0.625093	-3.26736	1.40245	-3.41656	-6.07219	2.87967	-0.027855	1.29646
1051.97	4.60137	-9.81199	-0.558478	2.05798	-8.77417	0.429535	1.88578	6.80559	-5.93496	0.3065	-6.53723	-0.804354	-1.30999	-3.48551	2.35977	6.584	4.27922
1053.7	-9.86236	-12.8818	-6.86986	4.98371	-5.31908	4.63548	-6.70174	7.59683	-9.21417	-5.40092	2.93241	-0.701012	0.551074	1.35523	3.00062	5.79391	-1.60033
1055.43	-10.8758	2.25306	-0.866467	4.96272	11.0442	-5.99546	-5.57535	-3.5855	-5.51935	-9.05934	7.00197	4.44175	1.54226	11.0568	0.637638	8.70602	-3.78117
1057.15	-53.835	-2.33529	6.23341	1.80339	22.7487	-6.55699	-14.3875	-1.9751	-4.35729	-20.5494	7.34143	11.4327	9.1809	7.18105	8.28556	9.4327	-2.13569
1058.88	-25.2759	-0.366557	4.929	-4.00529	6.10807	-5.94033	-10.7777	-1.27694	-1.94613	-8.7563	5.5749	11.8353	1.68835	3.88229	9.56373	-4.9223	-10.1265
1060.6	-27.83	10.7046	5.07958	3.35784	7.96139	3.17565	-4.89202	-3.25267	5.182	-13.0998	6.98948	8.35736	-3.15152	3.82215	6.11127	-16.1618	-6.34881
1062.33	19.2118	8.91037	5.27757	-3.49401	3.93941	-1.49582	3.3651	-4.15849	-0.0613281	-5.33842	-3.22595	4.67469	-11.9863	7.24443	-4.94677	-7.79013	3.24527
1064.05	16.0674	0.115325	-0.812285	-1.81143	-13.6887	16.6466	0.906265	-17.3806	1.01478	2.92275	-3.55236	-5.0452	-15.7855	10.6122	2.6644	-8.45367	-0.0333742
1065.78	8.07962	-4.35291	-6.10252	-4.84768	-18.1904	14.6598	-4.29156	-4.58196	-1.33497	5.48671	-0.768846	-0.757757	-14.4382	9.08725	3.06116	-1.58027	1.41197
1067.5	-6.3343	-2.27244	-4.80339	5.91762	-22.4247	21.35	-12.9731	-4.91112	-0.857988	-8.38766	12.1826	-14.8326	-0.65692	5.5717	12.3412	-8.38174	-0.421028
1069.22	-26.5563	-6.67017	-10.6828	1.06062	-9.42862	16.741	-15.2145	-3.34649	2.81276	-13.2347	14.1314	-9.80854	-3.65584	3.83283	10.3896	-9.18617	1.48011
1070.95	-19.7707	4.55909	-14.3453	-7.54901	-11.6307	5.74328	-6.93838	5.12572	3.57592	-14.45	4.22985	-3.23035	5.32546	-6.2209	15.7241	-8.21179	8.32693
1072.67	-53.6946	0.680017	-15.7165	2.69271	-13.6073	15.1476	-6.51891	-2.43182	-0.79248	0.424317	6.75464	-0.927883	5.52308	-2.98607	13.6759	-5.25985	-1.50171
1074.39	-103.411	-0.0427493	-9.88979	11.7337	4.41553	19.268	-8.05809	-4.52527	1.34442	-6.92413	8.50592	6.65034	11.1684	-0.397912	6.02597	-0.530696	-0.297993
1076.12	-90.4373	-10.3462	-4.76193	2.76106	12.4262	10.3204	-8.83914	-3.08383	1.21408	3.86976	6.45116	0.176959	4.90482	2.94604	-0.665782	7.80681	-2.2097
1077.84	-100.681	-5.96868	-10.0994	-1.48745	7.61264	11.8882	-4.8603	-15.1333	3.69978	14.517	-2.64596	5.25995	4.9959	0.318963	-0.754074	1.1615	-3.37855
1079.56	-97.8	-15.3605	-4.56144	-5.63793	9.87422	9.88395	-5.68819	-8.01646	-0.558157	17.7321	-2.05491	11.0805	0.824286	-0.520607	-4.44353	3.30077	-2.23396
1081.28	-87.2765	-15.3312	1.18235	-4.71661	8.19225	10.3281	-7.71136	-9.14305	0.853239	15.3331	4.88506	3.09606	4.4779	-2.8592	-2.7693	-2.05302	-5.03315
1083	-14.8439	-5.97465	-1.66243	-14.7808	10.7434	-3.23821	-0.584668	3.71755	8.9495	11.6225	7.52886	-3.96911	-11.6172	-9.7744	-4.58025	-6.40646	-0.260295
1084.72	32.4953	3.48618	2.55945	-17.2731	3.80682	-7.03124	5.69849	5.94352	8.628	11.2099	3.66034	-3.57283	-14.1372	-11.3942	-1.71851	-14.5884	-0.643839
1086.44	-17.0205	6.08906	-9.47405	2.38144	3.66219	4.53038	3.07158	-1.93935	2.34287	7.02369	7.71886	0.919184	-4.17036	-9.27897	-0.389236	-11.5018	0.386149
1088.16	-49.651	-0.354864	-8.37062	11.342	19.0344	6.33585	-2.29068	-1.22987	-2.92733	-0.219674	4.31603	7.97055	4.62877	-3.37385	-1.57628	-2.81204	-2.28989
1089.88	-39.4605	-4.86366	2.31745	-0.984073	26.7416	-1.90406	-0.567602	-1.87606	-1.9496	3.57537	1.86432	18.3891	5.76108	1.33106	-1.46132	2.15763	-5.21235
1091.6	-43.4279	3.60894	0.0560221	4.21622	24.059	1.46911	-2.70328	-8.08506	-3.1546	-2.04227	-4.17738	18.5027	5.19015	5.49184	-0.047747	-3.96268	2.06649
1093.32	-21.9082	1.93084	-10.4505	8.70115	9.08104	2.73092	1.53624	-4.92802	1.03039	8.80365	-7.12324	8.90415	0.574706	5.44177	4.31132	-6.33488	-1.21689
1095.03	-12.6797	2.492	-9.90919	4.37716	6.18542	-2.05428	-2.53883	0.348264	2.04261	9.48719	-7.12976	6.9276	-5.78089	3.23256	0.463461	-6.73986	-4.62467
1096.75	23.5806	15.0781	-9.08591	0.142142	9.6153	-21.9851	0.347191	11.2343	10.95	5.67491	-5.74182	-1.78413	-9.65408	-2.74212	-2.21744	2.91435	1.49334
1098.47	39.5465	19.18	-4.26789	-9.71984	6.10712	-33.3929	5.65416	20.5708	6.0453	1.70529	-11.2194	4.43912	-6.33193	-4.52735	-5.65969	9.79644	10.0815
1100.19	27.9148	16.578	-8.68169	-7.83945	-3.06146	-27.2547	4.41304	18.5588	3.00001	-0.821876	-5.7374	2.86499	-1.2877	-0.49145	-5.99761	13.9757	9.84602
1101.9	72.2116	23.0939	-5.55524	-23.5796	-2.24239	-44.388	11.2466	17.9546	3.50791	0.831611	-10.1225	5.05109	0.19916	0.291352	-8.33839	26.0851	13.1779
1103.62	29.1264	18.0939	-2.11842	-16.2629	9.60091	-34.3266	11.0379	4.10702	1.59976	1.86556	-7.59003	9.44807	6.15516	3.66585	-5.62226	24.8003	5.36874
1105.33	32.6459	24.5415	-6.33659	-7.84525	3.42399	-19.6312	11.9637	-7.14813	2.29191	2.52239	-3.32445	1.8783	3.8382	5.29101	-1.45118	16.5072	2.33788
1107.05	22.5768	19.9836	-6.26865	3.3005	8.15669	-8.07635	14.3004	-7.4805	4.72144	3.65174	-0.115729	-2.73501	9.03387	2.63095	1.69594	8.10993	-2.84223
1108.77	9.37995	13.2633	0.740786	3.47307	2.40851	-1.1834	5.89661	-6.39746	-1.58133	-1.0842	-1.876	5.59319	6.97054	-2.03678	-0.204604	1.20153	-6.04671
1110.48	9.9244	17.8961	-6.276	-0.83572	14.9332	-14.0675	8.18091	0.425157	4.78443	-6.09074	-4.56662	3.61841	4.831	-6.02899	-6.5948	2.48107	2.669
1112.2	-2.96142	11.1478	-5.76713	-1.25487	7.37301	-5.20328	0.661065	3.00139	-5.74876	-10.2684	-0.231039	4.97547	8.86781	-6.40586	-3.62984	2.51131	9.56009
1113.91	21.394	5.43737	-3.93063	-3.67972	-0.341163	0.330184	-3.52076	5.58119	-5.11071	-14.0805	7.91749	-3.84471	3.30124	-5.54232	0.196887	-3.15038	8.17127
1115.62	8.29946	1.44251	-15.4624	4.9154	-8.88747	5.53241	-3.19425	2.40667	-4.01249	-3.33256	1.51314	-8.30452	2.92236	-5.72315	0.398083	-6.03101	5.97219
1117.34	-23.7222	-4.03018	-23.2993	3.5001	-10.3248	12.5592	-3.60919	0.0848025	-5.20097	1.77847	-3.33019	-8.68078	6.0871	-8.50914	6.83966	-7.96338	3.46676
1119.05	-7.06241	-3.39499	-24.6854	4.15643	-21.4158	15.689	-0.295701	-0.226236	-9.99326	9.0162	-5.70992	-6.94006	3.36908	-2.24973	6.62058	-3.39055	1.69846
1120.76	-26.4719	-12.8016	-16.8044	11.468	-17.2903	20.985	-0.446483	3.95298	-13.1063	7.58045	-4.36405	1.68067	13.2183	5.25754	3.45938	0.357156	-4.04127
1122.47	-7.10376	-8.53397	-3.23314	11.9299	-29.0412	25.6706	-4.3744	-2.36559	-13.3185	7.82959	0.786854	-3.58871	8.80446	4.31594	8.40395	-7.00134	-10.4515
1124.19	-0.507673	1.10886	-10.9029	13.4109	-17.8314	19.8718	0.974928	-6.39299	-7.82894	15.927	2.18462	-9.93595	4.0299	4.79152	6.26661	-7.79471	-14.3601
1125.9	-12.7953	-4.87414	9.43898	8.6979	-0.763831	21.6401	-5.93417	-6.0832	-10.322	9.09481	8.47971	-3.33046	2.88293	1.62845	4.74622	-13.0006	-20.1952
1127.61	42.877	6.93225	10.5941	2.75806	2.71706	8.33371	4.38519	1.67134	-0.252068	-1.00883	4.95657	-6.92393	-2.73956	-1.71272	1.07412	-16.4369	-11.13
1129.32	39.3322	6.66113	9.41525	12.7356	2.22636	12.3175	-0.170867	-3.42484	-3.46386	-0.0119616	8.64605	-13.6284	0.985603	3.01944	-0.377856	-16.7055	-11.4246
1131.03	22.1759	6.38894	6.42313	3.26463	11.2956	3.10544	2.3757	-2.62783	-1.54454	-4.63754	1.69588	-12.8511	2.19134	-1.34971	7.07415	-10.3102	-3.27361
1132.74	42.0558	6.33104	2.10021	-3.9559	6.94897	-6.97925	6.90649	1.43296	-2.38458	-4.3377	-6.0262	-6.3587	-2.1182	6.74716	0.991473	6.42135	8.11785
1134.45	18.4127	-2.32666	5.07439	-6.542	15.6549	-5.22629	3.79353	-2.65465	1.13508	-2.47054	-1.54748	2.18003	-1.63211	7.68758	-2.30264	11.1694	4.96829
1136.16	2.07436	-4.84234	-0.636438	-6.32369	10.9982	-1.69672	-0.0982131	-5.28497	0.842157	3.54982	5.55596	-1.12791	-4.8988	5.16909	-0.421664	8.90502	3.93012
1137.87	-10.3575	0.672904	-6.41548	3.09457	6.24459	0.957878	-0.715145	-9.71569	-0.749922	6.76399	9.76476	-8.00025	-1.40867	1.0213	5.74003	3.21075	0.188265
1139.58	-42.9364	-0.625072	-5.76187	4.20599	8.35649	2.88841	0.15286	-10.235	-0.6931	2.84866	3.50866	1.05662	-0.0655576	-2.97657	6.39383	-4.85057	-3.92115
1141.28	-33.8629	0.134616	-4.2178	7.65656	4.46522	0.551198	-1.15359	-5.57861	-3.4705	-2.85689	5.23412	-3.71322	1.60092	-2.51256	6.04503	-5.36353	0.758508
1142.99	-15.1301	-0.0839948	-2.49633	14.1237	-6.72563	6.67394	-9.4911	-9.80223	-6.20833	-2.26397	16.0383	-15.0051	-2.05767	0.31851	5.1224	-12.8021	-1.90526
1144.7	-14.748	7.20063	-2.34876	6.80962	1.50543	2.79022	-5.44425	-11.2645	2.24629	-1.38843	12.1541	-11.5547	-6.66071	-1.45473	5.72946	-13.9176	0.0713913
1146.41	13.5921	11.9132	6.78763	-8.54215	-0.445532	-0.171074	0.854423	-10.653	6.4622	0.47982	3.06475	-6.47484	-12.2358	-1.92611	-0.37545	-9.59347	5.08037
1148.11	-1.00202	11.0837	12.3874	-5.09492	13.2893	4.0981	-3.10902	-13.5269	5.65192	-2.46529	8.87456	-6.22611	-15.7708	-1.88888	-2.01811	-9.49853	-0.604628
1149.82	-22.8834	5.64971	8.37766	-10.381	12.9103	1.87941	-3.69141	-9.2931	5.97086	-2.0114	2.52176	-6.36155	-16.3294	-0.823737	1.52018	-5.40342	-1.43563
1151.53	-33.8841	0.0898051	6.21294	-0.980679	9.12545	6.83875	-0.589031	-5.47879	0.160599	-2.40203	-0.176571	-12.9201	-15.0987	-5.46509	5.66077	-8.30835	0.90628
1153.23	-47.2907	2.60431	-3.34979	6.25934	-2.40336	8.307	9.15604	-5.32015	-3.64811	2.27146	-2.05489	-14.2228	-4.81747	0.0794487	2.70065	-9.0484	-5.6501
1154.94	-47.1218	-9.96028	-0.565207	17.055	-12.0654	13.1102	4.74242	-1.39108	-11.6709	7.71389	1.60274	-17.1096	7.8636	1.49921	-1.3856	-0.3576	-7.42804
1156.64	6.34939	-7.96231	-7.2692	20.1108	-24.2999	7.09664	6.23404	3.43648	-9.89162	15.2866	4.25336	-18.1657	9.81889	3.06946	-6.34413	4.63003	-3.92736
1158.35	17.6041	-15.1295	-2.01053	25.2607	-10.253	2.84938	1.19685	13.0934	-7.84729	12.7642	5.76106	-12.0516	14.3233	2.45454	-10.8351	13.4125	1.56711
1160.05	25.5054	-18.4825	2.7303	25.5147	2.94027	0.233148	-2.28207	12.6984	-6.6913	7.15031	3.24286	-9.74147	7.97518	1.82168	-9.53203	12.2979	3.43307
1161.75	16.478	-16.9885	9.65132	33.8986	14.2006	4.63554	-13.7373	9.04654	-11.45	-7.39664	9.52649	-6.28934	4.78746	7.50771	-7.33007	8.77676	2.8003
1163.46	36.1717	-7.82022	9.53954	14.4647	8.19352	-3.74387	-11.7836	3.77253	-5.66665	-7.22871	7.79496	-5.12585	-1.78964	6.68938	-3.33326	4.35169	2.87835
1165.16	33.484	-5.58263	10.6338	6.68864	5.45877	-8.23421	-1.74113	5.41303	-7.76263	-0.842345	0.696752	2.67097	-1.62277	3.72799	-5.65939	4.77824	3.74822
1166.86	18.8053	0.727692	8.33195	7.33936	0.315375	-2.85905	4.15477	-2.19002	-1.2687	-0.217118	-0.918002	0.257068	2.83286	5.76538	-4.37447	-0.0591128	0.25566
1168.57	7.0163	-4.85647	9.08919	5.05657	0.351667	-6.88592	5.14074	-0.843767	0.976991	0.318711	-8.17246	3.93478	8.2407	1.4982	-3.81598	8.41894	2.49572
1170.27	16.2221	-0.320134	5.78416	2.21574	4.36726	-12.9991	8.06125	-0.42905	2.0011	4.8332	-13.6454	4.25207	5.77169	0.722518	0.0519409	12.7045	4.84148
1171.97	19.0701	-4.72425	4.21401	1.73061	13.1816	-18.3623	4.96686	3.0021	0.244054	7.49673	-16.5649	5.31729	4.29866	0.224299	-2.77417	19.9795	4.42351
1173.67	-14.9087	-10.5359	5.6271	5.34989	20.4023	-8.71885	-1.84631	-1.5356	2.15012	4.88042	-14.3074	4.1942	3.03948	-3.81	2.19515	16.058	-1.04761
1175.37	-4.95828	0.23126	9.13111	-1.4125	14.7237	-6.3727	-4.31768	-8.42087	1.03743	-0.90405	-7.25924	2.87883	-3.5085	-1.22195	1.36682	2.38371	-3.4371
1177.07	20.1115	9.19387	4.94517	-9.27144	5.04293	-8.27049	-3.40375	-8.64535	3.49013	-0.0860466	-1.49103	-6.24893	-10.561	-0.765764	4.86618	-3.77112	-5.1405
1178.77	15.4771	4.92899	7.33332	-9.67938	10.3733	-12.5105	-4.31497	-0.148351	3.19795	0.900781	-3.62794	-1.2786	-9.3466	-0.933236	2.50445	1.84939	-4.87124
1180.47	10.5272	7.02741	9.02601	-9.4037	10.6596	-7.01894	-3.42667	-1.27537	6.6327	-4.96744	-2.89988	0.620065	-3.65043	0.11375	4.20298	0.539457	-1.26187
1182.17	2.45986	2.57905	9.72343	-13.7624	8.79765	-11.2681	-1.70743	8.11085	1.49673	-11.1772	-4.25174	10.8765	5.9087	2.6682	0.442028	9.84693	4.65432
1183.87	1.86291	6.03035	10.2638	-19.7684	8.28693	-11.5395	3.39242	4.39838	1.10097	-9.1758	-2.18953	12.6026	5.60239	6.00605	2.8768	8.88913	5.75331
1185.57	15.0102	-0.607803	0.814546	-19.8117	5.12354	-6.41321	6.65669	5.32554	4.98041	-2.51322	-2.71695	3.42183	-2.35169	8.11979	1.10569	0.326757	1.59019
1187.27	-4.88592	-6.19903	0.899489	-15.2079	0.780336	-1.41747	4.96937	5.05791	2.99198	-2.67735	-1.76393	1.06782	0.814528	5.90981	2.39288	-4.22768	-1.88286
1188.97	-12.8314	-6.97221	2.26597	-14.6515	2.52806	-3.54099	4.19923	3.44575	4.67718	-2.95653	-4.11553	3.84442	0.732949	2.18599	2.58484	-3.19456	0.118948
1190.66	-0.437036	-6.17223	-1.4249	-6.36737	-0.871093	-9.12553	2.24398	5.54303	4.43093	0.649449	-5.97428	2.36024	-1.16283	3.05277	1.52182	1.08889	-1.31774
1192.36	1.2947	-14.1726	4.66373	-1.11555	6.32998	-13.0082	-3.87878	13.6795	-1.84139	0.942069	-4.90037	1.40336	-0.726908	2.37805	-0.940276	1.69043	-2.81047
1194.06	14.1738	-9.15717	5.40491	3.68393	6.99708	-4.70335	-1.16906	7.94863	-2.76463	-2.74009	-1.9634	1.77254	-0.777307	4.1814	0.27254	-4.44055	-1.59447
1195.76	3.45612	-8.19279	5.02225	4.86236	6.16076	-0.260371	-0.885453	9.59088	-6.12628	-7.72446	0.829724	0.226729	3.66441	4.67251	1.35142	-0.159416	2.09244
1197.45	-8.5223	-5.03103	-1.27375	4.48787	-1.08673	5.52496	2.35138	4.94949	-5.55293	-2.48652	0.461746	0.772998	4.8632	0.276498	0.130051	-4.39474	2.07091
1199.15	-17.9655	-7.83952	-3.4384	5.27095	-3.87107	11.9979	1.81322	3.95887	-4.82578	2.63249	-0.789614	1.06546	5.79919	-1.14671	-0.281238	-5.54892	-4.06442
1200.84	-26.4451	-6.37007	-5.88354	8.7456	-0.569774	9.04789	-0.669546	6.09671	-7.78628	1.09955	-2.07219	2.57599	4.79778	-4.17703	-6.63336	-5.63238	0.0155561
1202.54	-30.3383	-3.18752	-3.60559	-1.84775	6.50857	0.361583	-0.9483	4.00454	-1.4001	-0.872631	-4.30394	7.77158	5.91262	-9.13894	-7.45277	2.01061	7.05675
1204.23	-17.5518	4.28156	-4.62875	-4.25542	1.90014	-2.84245	-0.226334	-1.69811	2.55727	1.6593	-2.94773	4.51328	4.27031	-7.18756	-3.11108	3.31806	4.16847
1205.93	5.56079	3.23224	-1.61348	-11.0821	0.689429	-6.11846	0.985106	-0.862659	2.32014	2.59633	0.445119	2.11866	2.04557	-7.309	-0.970659	0.837126	5.25382
1207.62	33.3996	11.2288	-3.48881	-15.2808	-1.78382	-5.02795	7.50734	-6.14439	7.23021	-0.747707	3.24918	-0.412068	-5.87393	-5.68891	2.43327	-5.85726	5.37137
1209.32	35.8202	11.5914	-2.04759	-10.1143	-5.57124	-5.08365	6.91085	-7.31978	5.34502	-2.13769	4.56558	-0.559544	-2.89616	-0.63592	-1.26018	0.307742	3.40932
1211.01	41.5912	10.4361	-7.58904	-1.36432	-10.3066	-3.89335	8.97231	-4.16092	1.347	-3.29524	1.63969	-2.78548	0.936024	-0.0393454	-1.72539	1.92153	6.39542
1212.7	18.0186	-3.04177	-1.98285	4.80064	-8.56922	3.5113	-1.17856	-1.60569	-4.54836	-3.01187	1.56232	0.0264473	3.93319	2.49378	-0.496081	3.48418	0.200753
1214.39	16.194	-5.32688	0.538659	7.30519	-6.10253	2.14719	-3.20871	4.02072	-7.46894	-6.63257	1.38678	-4.06869	5.79682	3.88194	-1.77024	5.17378	5.18793
1216.09	-9.87968	-12.3871	0.87023	-1.08894	-8.25238	5.41155	-6.6919	5.13743	-7.06581	-6.5419	3.0399	0.841136	7.48041	1.27033	-1.22828	6.51211	7.4585
1217.78	-14.8462	-8.75931	6.72165	-1.83635	-7.67413	10.8253	-7.57943	3.3929	-5.3229	-6.69537	6.00674	-0.121576	3.81348	1.44527	0.255206	4.33433	5.92028
1219.47	2.82982	-0.951756	5.48199	-11.1057	0.953883	-1.77087	0.150124	5.44671	1.01178	-6.60106	0.720735	6.65453	-1.75619	-0.142884	-5.28336	4.12729	8.61873
1221.16	-0.804096	4.2529	3.82593	-10.4471	-0.192462	-3.55134	1.28836	3.24931	3.15757	-3.30251	-2.07877	9.4171	-4.45961	-0.434981	-5.10372	-0.419063	2.27249
1222.85	2.33081	3.54142	7.26251	2.83168	1.53966	-0.902398	-4.69632	-1.36773	0.895109	-3.47524	-2.11642	10.3127	-2.66581	1.22478	-7.34544	2.50558	2.73637
1224.54	32.4718	10.7788	5.36912	0.343384	-3.46278	-9.08711	1.89746	2.05228	-0.498352	-3.92485	-5.23799	4.55799	-0.826365	-1.76557	-2.24278	0.542778	9.23101
1226.23	27.9943	1.08269	8.13559	-7.16888	-6.0326	-7.609	-1.25238	5.016	-3.26232	-1.87515	-2.62237	3.85306	-0.946591	-4.9484	-1.88553	-3.60464	9.58431
1227.92	4.09984	1.8571	3.37837	-8.94377	-10.7165	-4.88439	5.97381	0.291225	-0.896848	7.04767	-3.1568	-0.852869	5.19133	-4.48687	0.566036	-3.46424	3.33607
1229.61	-53.9465	-9.41126	2.15372	-5.05186	-9.92458	11.6711	0.813707	-5.86342	1.577	9.54693	0.556266	3.68829	8.7744	-9.65639	4.15186	-5.8296	-3.13517
1231.3	-51.4612	-6.9486	7.57491	-7.24081	-5.63408	8.55145	5.10532	-4.51003	4.88684	8.76504	-0.110322	8.74084	4.58086	-6.71006	-1.21818	-0.889421	-4.58075
1232.99	-58.6232	-4.09684	1.00369	-3.25162	3.22401	7.19999	4.86541	-3.34272	9.175	1.97805	-2.75603	12.2721	2.20028	-5.53143	-2.60843	2.83853	-4.96693
1234.68	-45.4179	1.15779	1.04457	-2.45749	0.393818	7.27848	6.60673	-1.25443	7.648	-0.223368	-6.17739	17.185	3.70748	-1.86747	-2.75393	3.01194	-6.09243
1236.37	-26.2763	4.00387	1.93916	4.64146	1.60834	4.46209	2.69858	3.08369	4.40579	-5.19104	-5.21838	12.7386	6.45438	-1.00991	-3.62809	3.50294	-1.1075
1238.06	21.213	8.62691	5.069	-0.0312119	2.66267	-3.49758	4.83224	7.55212	5.1597	-4.84021	-6.64621	8.42668	-2.76474	1.56362	-5.4504	-1.30146	1.10556
1239.74	23.6767	4.42043	6.00828	-2.59106	0.365667	-2.5512	2.92328	9.80738	1.21246	-3.64077	-2.71435	9.21649	-1.53247	4.04852	-8.26051	-1.55656	2.86599
1241.43	13.8547	-1.16739	6.43475	3.04911	1.93673	-0.94705	-0.013859	4.81723	2.10356	0.147069	-3.61411	9.61654	0.682786	4.74941	-5.72842	-2.20319	-4.62913
1243.12	20.7816	-5.14513	13.6732	2.97288	2.89346	-1.33566	-3.17782	1.75873	5.56564	1.89346	-6.8153	11.738	-2.60089	-4.7711	-2.48188	-4.46486	-3.79255
1244.8	22.9797	-6.40132	10.7584	-4.33668	-0.229722	-6.54476	-3.58394	0.900068	6.23117	-0.176549	-6.39215	8.30122	-7.36985	-7.38318	-4.37497	1.97121	4.53231
1246.49	3.60218	-6.31024	-0.879829	-2.83203	-3.18075	-0.840511	-6.53134	-2.14235	4.83216	-7.28354	-3.65655	3.3836	-7.77774	-11.0156	-1.25453	-0.549211	6.09682
1248.18	10.2569	2.45241	-0.833703	-7.63459	-4.84028	-5.53507	1.64645	-3.41864	5.17772	-6.91449	-5.93119	1.73031	-3.26952	-11.0164	0.156009	1.76934	9.32686
1249.86	11.9562	10.1432	0.370173	-4.27252	-0.343257	-11.2098	3.1138	-2.95185	6.37408	-10.4564	-3.50235	-5.04158	0.64998	-10.8814	3.60255	1.93664	9.86723
1251.54	17.9753	10.9059	0.102356	-9.13414	3.60234	-15.3032	5.29095	-2.39443	7.20161	-6.43867	-2.08919	-7.56076	-3.41855	-5.32305	0.948763	3.48755	7.2726
1253.23	4.75332	9.93272	-0.870476	-4.92108	0.935466	-10.6215	1.0495	-4.62735	1.82963	-5.45066	4.85892	-10.6313	-1.20709	-1.09586	1.54766	-0.253598	4.66647
1254.91	16.4725	4.83326	3.22676	-1.78582	5.64978	-12.9481	-3.44152	-1.99292	-0.0590369	-5.27955	3.7453	-8.53087	-6.06324	1.34854	3.99335	-0.689878	-0.462378
1256.6	29.8324	3.85335	11.2986	-6.29855	6.78586	-16.459	-2.63394	0.766912	0.389084	-1.40383	-4.2592	-2.29954	-5.92931	-2.59625	4.47034	-2.88522	0.418758
1258.28	30.4854	2.9465	4.2744	-3.87894	2.7692	-10.1683	-6.21199	-0.928323	0.166302	-0.654452	-2.29885	-5.93311	-3.96792	-1.78123	4.94001	-3.30297	3.03222
1259.96	-1.05683	-3.16507	-1.33626	8.15099	6.01049	2.40177	-6.59281	-1.39332	-0.865216	-3.7819	-2.65177	-1.33935	1.30764	-0.0628044	1.06842	-5.81241	-4.32415
1261.65	-30.6393	-7.59881	-1.04102	13.6648	0.757127	15.7899	-9.987	-4.09146	0.0461556	-4.23315	1.26765	1.30338	5.86309	-2.71632	1.30039	-9.02623	-9.05824
1263.33	-42.0419	-5.82633	3.48763	13.1308	0.537648	18.542	-6.77497	-2.56643	2.19223	-9.9932	-2.18372	6.1	10.6977	-6.0786	2.97409	-6.2426	-8.18044
1265.01	-34.7403	-1.97617	2.54299	7.45167	0.494718	11.7339	-0.811942	-2.65908	4.91077	-6.08575	-0.67693	3.308	9.18707	-6.2693	-2.70147	-1.08796	-6.2573
1266.69	-7.46489	5.08612	2.128	0.288595	-2.85171	4.42767	4.23212	-3.82373	6.03696	-5.81745	1.32549	-1.8297	3.51467	-6.73144	-1.26221	-0.688111	-0.17434
1268.38	-0.241978	5.80834	2.04567	-2.4638	0.149836	-2.31459	7.44679	-4.60124	5.34317	-3.26587	0.483344	1.3727	1.88763	-5.39956	-1.9439	5.35467	1.46642
1270.05	14.5743	9.31387	5.35201	-11.887	4.49105	-9.88661	10.4928	-6.10847	5.35438	0.545087	2.26096	-0.21352	0.052307	-4.97289	-2.39496	6.00442	4.6741
1271.74	24.2216	7.12224	1.59858	-9.69318	8.89428	-10.7122	7.28915	-7.01387	1.5801	2.54178	5.49807	-2.22869	-1.70514	-3.25285	-1.72333	6.65413	5.95733
1273.42	23.9115	4.62832	-0.846267	-10.9809	6.23294	-9.42894	8.39349	-4.76833	1.43292	1.253	5.58918	-1.25184	-2.99039	-0.250194	-4.9169	7.79252	3.59214
1275.1	15.4289	0.0441353	-1.94624	-8.36194	0.0779389	-2.51152	3.02453	-2.41839	1.48647	-1.43794	8.0794	-2.95528	-6.7311	-2.78848	-4.06843	2.85414	1.18079
1276.78	23.1454	1.92285	-0.61642	-8.55476	-8.31162	-0.792609	4.85513	0.474192	0.933877	-1.35463	1.16386	0.613085	-3.32368	-3.98643	-2.09705	3.98343	2.09051
1278.46	25.7605	5.80591	-1.07855	-2.77505	-16.9477	1.50236	6.54508	-2.27409	-0.177333	2.95291	1.56523	2.4981	1.64073	-2.88453	0.618253	4.86267	1.24709
1280.13	20.4415	6.82801	0.712064	0.0622444	-17.7213	1.00902	7.05405	-3.87005	3.2442	4.62599	1.34481	2.64022	5.50348	-2.00147	4.12703	7.21432	3.21653
1281.81	2.58505	4.70974	3.79946	-1.32609	-9.95397	-1.61235	6.9585	-1.63821	3.94818	2.06831	2.92802	6.19254	5.33463	-2.71668	1.34181	4.22092	0.419871
1283.49	-2.731	1.50019	2.89908	-1.41164	-4.88345	-2.81218	4.3498	0.279776	2.0599	4.07637	4.85525	1.95085	2.00293	-1.85515	-0.503583	2.04721	-0.612568
1285.17	-28.2698	-4.8956	3.88646	-2.71219	0.509956	2.35229	0.988601	-1.12843	-0.0183258	1.95756	4.17663	5.29926	1.12966	-1.21605	1.29847	-3.66712	-6.61346
1286.85	-18.472	-6.60451	0.833241	-7.91928	1.2499	-2.23175	1.62886	2.83348	2.15654	2.07449	7.11377	0.253527	-3.38219	-1.51441	1.55827	-4.59732	-6.19974
1288.52	-13.1444	-3.79631	-3.47136	-7.62908	-1.46813	-3.13947	1.80227	1.21407	0.954685	2.27037	8.15162	-1.54261	-2.86603	-0.659051	1.81465	-2.21056	-3.13321
1290.2	-15.6521	-4.07629	-4.97755	-2.49314	-0.391358	-0.501023	0.242599	-0.20442	-2.05711	1.0023	4.66798	-0.286345	-0.576758	-0.158384	0.0758193	-1.74084	-0.417519
1291.88	-0.994192	-0.820646	-4.01217	-0.766861	-4.03424	-0.338703	0.692824	-0.365536	-2.83103	-0.582228	4.47284	-1.24957	0.598352	-1.11247	2.10567	-2.11414	2.77918
1293.55	15.7479	3.14558	-2.19536	2.77851	-5.63202	-1.23604	-0.120181	-3.24898	0.12704	0.413897	4.10684	-6.2659	0.898958	-1.44804	1.96575	-1.59585	3.60311
1295.23	23.6401	4.70934	0.241274	-0.455534	-4.23556	-4.66449	0.895932	-0.233108	1.87879	-1.33954	4.54012	-4.38296	2.05472	-2.76394	0.0808579	1.06968	2.68088
1296.9	36.3444	4.65524	0.257151	1.40211	-1.03673	-7.75269	0.309214	3.83921	1.12748	-4.15148	2.73583	-4.8597	-0.689114	-2.15651	-3.72444	4.2647	3.26992
1298.58	15.8602	3.41329	0.30345	-2.02673	0.67043	-4.40296	-1.17169	1.90109	2.83795	-6.19591	1.64938	-0.810599	-3.06921	-1.95639	-3.90201	0.239575	0.160339
1300.25	0.933091	-0.805906	-2.02483	0.00234197	0.444194	-2.39959	-4.94286	4.02706	-1.10595	-4.32989	2.74846	0.192941	-2.79425	-1.99345	-3.59947	-0.520072	0.505378
1301.93	-19.077	-1.69272	-2.26253	3.64185	-1.79589	3.7565	-5.63975	-0.71377	-4.62366	-1.68832	1.08828	1.84926	0.227133	1.3325	-1.37238	-0.407387	-1.07767
1303.6	-16.1611	-1.99828	-1.31772	5.38204	1.75933	4.08425	-5.60604	-0.457667	-5.03058	-0.424407	-1.94147	1.78201	0.255047	2.03369	-2.68849	-1.90145	-2.89676
1305.27	4.05199	1.61617	0.53428	0.463547	-0.451901	-0.554302	-2.12544	2.06748	-2.00147	-0.305853	-3.06467	-2.4274	-1.30318	1.60665	-0.603341	-2.61061	-2.94447
1306.95	-0.924153	1.02152	-0.311254	1.64033	-6.54531	5.24357	-1.96533	-2.47226	-1.08197	4.86942	-1.05785	-4.23308	-1.91784	2.63891	0.41689	-6.57148	-7.56139
1308.62	3.78471	0.834478	1.03016	0.0521829	-3.5243	0.582207	1.12421	-0.845922	1.53398	7.07479	-1.63975	-2.82096	0.26059	0.0741973	-0.948834	-3.12258	-6.20998
1310.29	9.92805	-2.14154	-2.4543	-3.6756	-0.232951	-2.27067	3.74533	2.85349	1.18749	5.85863	-1.62635	-4.1182	-2.43287	-0.488764	-1.42144	-1.89128	-5.66501
1311.96	1.54345	-3.91917	-4.49619	-2.83089	1.51888	-2.88559	2.98065	3.47029	1.55568	5.70612	-2.98769	-1.20832	-2.22396	-1.02504	-4.13382	-3.09073	-4.14289
1313.64	-11.7431	-6.29401	-4.92697	3.76929	0.100379	3.31211	-0.665447	2.63523	-3.52754	2.99916	-2.42004	-0.53634	1.08069	-0.321861	-3.94947	-4.02024	-3.70041
1315.31	-14.3021	-3.85609	-3.46775	9.48354	-3.79002	7.75284	0.25712	-1.30083	-5.56244	2.43078	-3.58888	-0.677539	4.94644	1.91452	-3.10049	-3.86917	-2.4345
1316.98	6.29852	0.987827	-2.01325	8.76556	-6.94118	4.8089	0.603713	0.249449	-6.18749	-1.59386	0.368362	-1.32266	4.18198	6.36946	-6.21059	0.805848	0.203562
1318.65	8.70194	5.00335	1.1503	5.60739	-5.29081	1.96898	0.126881	-0.475711	-4.10379	-5.93619	2.41215	-0.442859	1.6459	8.06153	-6.71814	1.90266	0.652737
1320.32	-0.574914	5.0394	3.53431	4.17536	-6.59587	3.56341	-3.26231	-1.56599	-3.90264	-8.31952	5.79342	0.291606	-0.621254	9.32381	-5.91103	-0.346006	1.07679
1321.99	9.24462	5.26227	3.97434	1.08759	-5.55291	-1.19445	-2.73042	-0.591948	-2.7825	-7.57346	4.58694	-0.472627	-1.94353	8.2345	-4.98874	1.30585	1.94809
1323.66	13.0306	3.97168	-0.526617	-4.56351	-6.44573	-2.99057	-1.10273	0.278266	-0.314964	-5.74142	4.56123	-0.941711	-1.28198	5.93899	-1.91129	1.78792	1.27727
1325.33	19.8682	2.96258	-0.236088	-2.37812	-3.51922	-4.87291	-1.05188	3.11609	0.860523	-5.65913	4.81786	-2.41046	-0.614926	2.5017	-0.14181	2.62713	1.15439
1327	21.9116	3.02416	-2.9636	-1.98681	-3.42445	-2.93495	0.897724	2.99455	0.833088	-3.15604	3.68218	-2.92211	-0.201617	-1.10408	1.57189	3.28092	-0.652316
1328.67	24.1254	4.00585	-4.9168	-2.76539	-6.37499	-1.75039	5.18457	1.19207	1.80583	1.49438	1.12593	-2.65533	-0.488376	-3.09745	2.16368	1.58701	-1.84884
1330.33	30.4928	4.1874	-4.32726	-2.64587	-4.60134	-2.7678	5.72929	2.00758	1.18147	0.641396	2.30941	-2.69124	-3.31566	-1.43134	1.54852	5.02878	-1.13088
1332	22.534	2.82137	-3.65721	0.261193	-1.02727	0.210742	3.26221	-1.09573	2.52916	0.187441	2.41515	-3.17413	-7.20283	-0.290974	0.746519	2.82704	-2.70356
1333.67	11.2088	2.93401	-2.41918	1.49333	0.665565	-0.832393	0.983637	-0.945956	0.555471	-1.50945	1.37198	-2.27472	-6.18226	1.3042	-0.87665	1.09809	-1.34404
1335.34	11.5605	2.24608	-1.61379	-0.0324566	-4.44943	0.357008	-1.9107	-2.04233	-1.69652	-2.73348	3.49391	-2.26856	-4.41621	5.00924	-0.358495	-0.380728	-2.38052
1337	7.75465	3.26718	0.486742	-2.05775	-2.13756	-1.57194	-1.54319	-1.20346	-0.690073	-5.33329	2.82055	-2.52199	-1.23935	4.78082	1.34011	-1.86209	-0.161467
1338.67	5.58663	2.8241	0.868594	1.60264	-1.50487	-1.79721	-0.258864	1.0039	-2.68717	-4.26783	1.9794	-2.59796	2.47307	4.24578	1.10847	-0.127721	-0.748139
1340.34	1.52241	-0.0174734	0.495637	-2.32072	0.823198	0.289403	0.112636	1.12022	-2.78888	-2.17843	-0.833319	0.513239	1.8537	0.816234	0.827199	-2.1501	-0.244629
1342	-7.48917	-1.02888	1.10402	-5.19528	0.302853	1.8374	2.80201	-0.622802	-1.97569	0.970162	-2.39312	3.46514	3.14105	-1.65999	1.32304	-2.53737	-1.99614
1343.67	-25.8216	-6.96031	1.34944	0.638548	3.4521	7.85441	0.455973	-1.03439	-1.50957	0.240522	-1.61772	3.95287	4.0776	-0.649796	2.07521	-0.0068358	-4.91635
1345.33	-6.14852	-3.1253	0.151328	1.7151	-1.96752	8.77162	1.37256	-2.9056	-0.679023	2.43036	-0.456431	1.35048	0.111143	-0.463747	2.11142	-3.48495	-5.91953
1347	1.24686	-0.90111	0.312102	1.104	-3.75773	8.71405	2.16664	-2.30718	-0.560745	1.14438	-1.11945	1.86279	-0.903025	-0.64495	1.84516	-5.90015	-6.48585
1348.66	-3.17927	-1.33071	1.55975	0.430211	-7.32392	10.9286	-0.651102	-3.45835	-0.736861	-0.707073	2.99819	0.780951	0.992751	1.51325	3.48143	-5.48962	-6.74572
1350.33	0.649369	0.256444	2.48962	0.103595	-5.95517	7.85893	-0.389414	-0.780785	-2.49555	-2.08765	4.56206	-3.0973	2.61159	1.71534	3.47774	-3.1746	-3.67147
1351.99	3.18457	0.479624	-1.43556	3.57352	-8.24307	7.38885	-0.825857	-0.13654	-2.87963	0.335937	4.68041	-5.72131	2.09431	2.96491	2.20797	-2.06958	-3.54143
1353.65	2.20741	-2.65543	0.595944	1.43929	-8.14469	5.85122	-2.92753	0.624322	-2.37406	2.16971	2.58589	-5.39185	2.73193	1.44785	3.33642	-1.48191	-1.60096
1355.32	-9.29203	-4.0892	5.03136	2.02447	-5.40091	4.44781	-3.80296	1.0878	-3.48212	1.55933	2.00938	-3.6301	5.94079	1.09884	3.89697	2.51727	-1.84977
1356.98	-24.0499	-9.20161	6.68587	3.29462	-0.336559	4.71963	-5.36909	2.2654	-3.44529	0.874409	1.82026	0.24511	7.22469	2.6353	3.83668	4.5802	-4.72648
1358.64	-13.8947	-8.44328	5.26109	1.75308	-3.69477	5.08028	-4.57377	3.33408	-2.7284	1.08693	1.76858	0.536405	3.44219	3.1415	4.9589	1.54713	-4.37207
1360.3	-12.5595	-9.30071	4.44277	1.14509	-3.00705	5.20461	-2.59064	3.31169	-2.59073	1.67515	-0.123443	2.16689	1.50819	4.37541	3.40083	0.482631	-5.57776
1361.96	-23.5617	-11.5856	5.7302	1.39161	-0.831212	4.96075	-3.36113	5.40021	-4.1066	0.0982944	-0.161001	5.35223	2.85732	4.40534	0.172192	2.32317	-4.61181
1363.63	-20.5986	-9.52441	2.11744	2.9396	-3.17148	6.09673	-2.63592	5.93011	-6.95362	-1.10645	0.512748	5.12332	3.88999	4.86779	-1.10372	4.8862	-2.72869
1365.29	-7.93986	-4.35743	-1.15807	2.16183	-2.26549	1.74733	0.490513	7.30064	-4.86931	-1.46343	0.118702	3.86858	0.628682	2.2815	-3.95501	3.69073	0.279457
1366.95	7.03953	-0.0700384	1.28007	1.6152	-2.72174	-3.02622	3.4976	8.29723	-4.25863	-3.51543	-2.83281	2.58435	1.73275	1.72711	-4.57411	5.56986	4.04003
1368.61	17.3647	6.15838	2.84483	0.0524503	-0.0595558	-5.47285	6.18718	4.94498	-2.24289	-5.1592	-4.59629	0.611023	1.06845	0.532428	-4.70417	4.02232	6.44538
1370.27	28.0725	9.90528	2.68872	-6.19804	1.29261	-8.65784	8.04095	1.59205	0.786371	-2.99669	-4.76021	-0.33377	-1.82996	1.05083	-3.97538	2.69929	8.82317
1371.93	23.6928	8.89684	3.04167	-8.47823	2.71107	-5.4382	6.84663	-0.958409	2.30822	-5.96053	-2.22885	-0.668731	-2.86336	1.346	-1.97964	-0.368747	10.5746
1373.59	16.832	6.30109	2.07375	-8.51484	2.01047	-3.31869	6.88194	-4.26308	2.20528	-0.219479	-2.78013	0.105568	-1.49364	1.75949	-0.752896	-0.261941	7.29083
1375.25	6.68709	0.71771	3.83477	-4.67708	2.22486	-0.0721996	2.47823	-2.28299	0.666217	-0.184656	-2.14095	1.14397	-0.812942	1.63033	-0.247861	-0.303676	3.79672
1376.9	-10.5499	-2.31905	-2.46075	-0.348832	-1.75438	5.64006	-0.497559	-2.99152	-1.06007	1.84241	-0.298036	1.01225	1.14064	1.85653	1.68104	0.409362	0.55876
1378.56	-17.7693	-5.52692	-2.34244	1.98219	1.51679	6.04134	-3.72305	0.983458	-1.31996	-0.263097	0.665298	-0.189522	-1.11664	-1.0272	1.08098	-2.11106	-0.344688
1380.22	-14.5673	-4.38772	-2.87105	3.2826	-0.807599	3.90722	-2.97428	0.849489	-1.13255	1.0369	-1.47291	-1.02038	-0.470143	-0.395657	-0.571292	-2.80928	-3.20417
1381.88	-2.50165	0.229373	-6.14507	1.80849	-0.856329	0.337127	2.30913	0.299992	1.43726	4.38997	-4.30384	-3.22156	-1.51669	0.190695	-1.23337	-2.30888	-3.95277
1383.53	8.62335	2.94936	-3.18513	-2.9237	-1.80831	-3.97825	3.12786	2.29359	-0.450686	2.95397	-1.12261	-5.40594	-1.244	1.32775	0.0259421	0.307157	-0.837987
1385.19	6.37651	2.82581	0.084393	-5.20082	1.67523	-2.44225	2.84363	1.13608	-2.17893	-1.80751	2.58416	-2.80178	1.10636	2.46697	0.180198	-1.74768	0.139472
1386.85	3.60472	1.82054	-0.00161255	-8.88656	1.82956	-3.61355	5.06312	0.949705	-2.02716	0.959503	1.52464	0.25665	2.65133	2.32335	-1.3764	-2.00491	-0.228658
1388.5	13.5545	1.86167	2.05672	-6.74008	2.57856	-3.0523	4.24826	1.68842	-2.2377	-1.24973	1.6134	-2.39894	0.25227	2.3624	0.083827	-3.43853	0.585328
1390.16	-5.14705	-1.9156	-3.1579	-1.17777	6.00995	1.66684	0.238156	2.15803	-1.84738	-2.55376	1.51066	-4.40963	-2.09925	0.079648	0.138405	-6.60368	-0.222479
1391.81	-8.99237	-2.57151	-4.54044	0.62684	9.74912	0.170062	-1.57672	4.03532	-0.771155	-5.511	0.16568	-6.86463	-3.83473	-3.80104	0.662444	-8.37936	2.86918
1393.47	-12.0135	-1.30299	-6.42731	4.5036	9.32587	1.09626	0.42055	0.409392	1.80203	-2.98241	-3.51436	-6.01886	-2.50413	-4.83147	0.287653	-9.10497	1.43781
1395.12	0.848677	2.77399	-11.7996	3.1723	4.17647	1.21543	5.21735	-2.04062	2.69661	1.1589	-4.28528	-6.4263	-2.85313	-2.17534	0.558233	-6.79891	2.36756
1396.78	-1.41293	1.69695	-9.85926	2.28874	0.250161	3.28707	6.00892	-1.17049	0.971149	2.6273	-3.325	-4.15642	1.63358	-2.20917	0.838465	-5.33662	2.37241
1398.43	-5.9265	2.17703	-9.2517	3.39779	0.125491	4.34578	5.66137	-4.42856	0.258191	2.84349	-1.79918	-3.05897	4.1246	1.60724	0.711069	-3.76092	1.31133
1400.09	-19.8655	-0.69129	-10.4072	2.22047	-2.43927	8.67816	5.43876	-8.84011	0.414481	6.43995	0.339047	-1.29711	3.72111	1.38676	-0.22372	-4.73132	-0.287984
1401.74	6.70995	1.41861	-8.14011	2.50846	-3.40722	5.30113	4.43248	-7.17786	1.47959	6.06298	-0.083127	-4.43007	-0.588118	0.540925	-0.101248	-5.87811	1.00473
1403.39	-5.09003	-1.08934	-6.14524	3.02075	2.80238	4.27935	1.27368	-6.11292	1.88323	6.44543	-4.70475	-3.08544	-3.30118	-2.4253	-1.33265	-7.40537	-0.333833
1405.04	-7.93978	-4.03477	-3.5251	2.55101	4.47197	-0.739652	-2.56119	-0.437454	-0.512964	2.8127	-4.22849	-1.85674	-1.04812	-3.13728	-2.98004	-4.17563	2.44857
1406.7	-10.6778	-5.47289	-1.18071	2.31814	3.8382	-0.408208	-2.65925	0.389427	-0.401272	2.18455	-6.90734	0.684954	0.41338	-3.1939	-2.40608	-2.41409	3.23766
1408.35	-0.330525	-4.12405	-1.00352	-0.847673	-0.706344	-1.33435	-1.64094	1.71625	-0.464141	2.43548	-7.63963	1.61777	-1.32471	-0.973589	-2.05187	0.52609	4.74555
1410	14.6728	-0.584281	3.49617	-7.48888	2.59999	-7.41251	2.39465	4.25294	1.82693	3.34752	-9.6965	4.10249	-2.92932	-0.707798	-0.602035	3.14622	4.12114
1411.65	17.8542	3.60609	4.87505	-6.81082	6.28295	-12.4324	3.68256	2.71584	2.25382	3.8574	-7.4915	4.67348	-3.69085	1.6312	-2.08191	6.77849	3.12608
1413.3	11.4808	6.16006	2.03202	-5.90826	6.26159	-9.29975	4.60358	-2.92725	2.28693	5.65234	-1.06893	3.86365	-2.73076	2.78222	-1.69559	6.00346	-0.0644262
1414.95	23.9531	7.62262	1.96874	-3.07652	6.88014	-11.2191	4.57052	-0.860195	3.86202	5.43411	-0.151536	1.61051	-2.95302	3.7905	-1.93675	4.5667	-0.318042
1416.6	3.8043	3.55361	2.61926	-2.52133	5.90169	-3.92273	3.69873	-6.51659	4.07668	7.25918	-0.824898	4.49096	0.632845	2.42897	0.632439	3.87957	-3.2211
1418.25	-6.42945	-2.41839	1.03284	0.688853	5.26956	1.33279	-1.7297	-3.51315	-0.168046	1.68881	4.69664	3.42036	3.46164	3.81889	1.2934	3.54826	-3.01433
1419.9	-15.7143	-5.04083	-2.99649	-2.25022	-0.451393	3.46781	-0.355172	-3.16918	-0.736944	4.68443	1.1765	4.87326	5.32805	-0.250514	3.0579	4.96627	-0.0241173
1421.55	-10.0125	-5.34529	-3.40148	-2.7182	-1.15895	3.5412	-2.48838	-1.59361	-0.656314	2.00647	1.57895	3.66204	1.21882	-1.73219	2.12788	1.38599	2.25069
1423.2	-7.87253	-2.96523	-4.10943	-2.81929	1.34412	0.674626	-2.50171	-1.0186	0.879734	4.57348	0.732765	2.16923	-0.445129	-3.56171	2.26542	1.14084	1.2591
1424.85	-5.2938	-1.27897	-0.684209	2.47293	3.35199	-1.80598	-1.56171	-2.52143	-0.141618	2.76322	-0.885009	3.50075	0.947946	-3.59511	0.664437	2.26882	-0.457952
1426.5	-5.17287	2.52919	-0.978054	4.11145	6.34109	-1.82616	-1.0698	-3.26933	-0.613314	-0.116021	-1.6939	4.84232	-0.889687	-2.02628	-2.82901	0.761269	-1.62668
1428.14	2.12547	5.28763	1.2051	1.14735	7.22515	-3.58785	2.14981	-3.80443	1.07898	-0.284735	-6.98827	7.14821	-2.5536	0.404138	-2.8835	-0.258975	-1.37995
1429.79	8.50264	4.34162	2.64329	-2.07349	4.23872	-2.32112	3.84721	-4.89999	3.88294	1.41151	-6.28945	4.92599	-5.33066	0.350723	1.40552	-0.459779	-3.54836
1431.44	25.3689	8.0701	0.013115	-8.16753	1.0316	-5.31533	6.08874	-2.28739	3.12933	0.35885	-2.46421	2.7222	-5.69036	2.43447	1.90113	3.1091	1.90778
1433.09	30.2533	4.68085	1.27534	-12.3122	-5.32769	-4.43928	6.38856	-3.74391	2.66099	7.26695	-3.84531	3.57048	-5.08741	1.06246	3.78733	6.31027	1.84301
1434.73	22.6905	1.13659	-1.39449	-8.18956	-3.9372	-1.13947	1.9641	-3.92761	3.08345	8.25825	-0.306745	-1.07351	-7.2287	-0.741958	2.64126	0.875825	0.119991
1436.38	5.46245	0.564937	-2.74557	0.95703	0.352085	-0.148416	0.815204	-5.27891	3.77116	9.35194	-0.322602	-4.18768	-2.60495	-1.50578	0.0670032	2.57176	-1.05859
1438.02	-7.82428	-4.51572	-0.589603	8.32364	2.84659	0.973172	-3.23854	-5.36466	1.13448	5.96605	-0.695727	-3.28832	0.744311	-0.869416	0.216442	3.84236	-1.94335
1439.67	-9.97956	-4.04189	1.57116	5.82133	2.52225	0.408529	-5.32171	-2.80002	-0.521932	1.57929	-0.0431232	0.01649	2.45643	-1.31457	-2.47763	1.83619	-0.793836
1441.31	-16.9252	-5.01286	0.602448	10.6184	1.59512	3.47417	-5.83725	-3.44209	-3.53282	1.1836	-6.18224	-0.0886134	6.09017	-0.223111	3.54695	3.17265	0.0343501
1442.96	-16.6748	-5.96318	-4.14319	13.3985	-5.33296	4.96848	-5.8145	-3.8799	-3.23129	6.51369	-9.28774	-2.57139	4.0128	2.39572	7.11672	3.72776	-2.98141
1444.6	-4.5464	-3.80597	-6.63707	4.55507	-9.59068	4.28159	-2.11347	-3.29479	-0.991363	8.909	-5.53259	-2.79193	0.301106	5.48028	8.61818	5.04489	-2.98707
1446.25	-12.6115	-7.18524	-6.692	3.88694	-8.55033	10.0943	-1.87178	-5.49749	-0.0749275	10.0609	-5.38746	-1.35765	-4.32343	6.90122	7.41395	3.45036	-5.87999
1447.89	-16.6399	-6.71859	-6.4187	5.36631	-0.363356	8.62007	-1.10663	-2.04103	2.2146	8.03184	-1.07377	-2.40296	-4.42605	4.01842	5.08829	5.28926	-6.29675
1449.53	-22.2312	-6.76248	-2.23628	6.38358	2.67524	8.96218	0.817115	-6.03958	4.6287	9.14327	0.434366	0.148193	-3.11091	2.20331	0.762179	5.11832	-7.85278
1451.18	-31.7108	-9.27893	0.260778	8.7782	10.9782	7.83708	-2.02336	-5.19406	4.13035	6.76851	3.17884	-1.48632	-1.32725	0.0555616	0.716418	3.14724	-5.98427
1452.82	-29.4219	-10.6774	1.67175	6.10742	9.28897	4.18604	-4.10498	-2.28527	3.11596	3.55464	3.55345	-0.578258	1.3295	-2.3712	0.390542	1.11079	-4.33919
1454.46	-28.6186	-9.34273	3.06845	10.0426	14.6132	0.764648	-5.99332	-0.89207	2.4273	-0.43643	2.14504	-1.36212	3.48723	-3.06401	2.67983	2.56904	2.33846
1456.1	-18.6095	-5.16907	2.31764	8.01466	9.92162	-3.62174	-4.76229	-1.96488	2.88513	1.298	-1.36032	-1.2686	2.50526	-1.24979	2.75677	1.52611	5.31571
1457.74	-4.18762	-1.48985	2.61614	-0.375862	5.89433	-2.91309	-2.94138	-1.64437	3.41114	-1.58297	1.44423	-1.37326	-2.72083	2.93129	7.67609	0.173205	6.10276
1459.39	-2.16647	6.2058	-5.8719	-3.42252	1.06496	-3.45042	0.792426	-2.41871	2.63932	-0.788271	0.393511	1.40752	-2.09522	4.22883	3.55744	-0.561667	5.97324
1461.03	4.55917	1.7119	-4.57658	-1.94124	2.92418	-2.53593	-4.65419	4.36461	2.91688	-5.62736	4.34776	-1.33449	-10.3037	4.33321	1.70694	-2.69948	6.74707
1462.67	-6.69716	-2.09491	-3.93613	-1.59219	-0.795008	4.31041	-5.06384	-0.755659	0.214852	-4.50411	5.77715	-0.393984	-9.60307	5.4368	-0.135932	-7.82749	2.59837
1464.31	-10.8854	-2.69706	-6.28795	2.61992	-2.11419	6.27187	-4.748	-0.41041	-3.60046	-1.97908	4.94284	-3.31621	-7.0228	6.51016	1.1509	-8.0529	0.339152
1465.95	-7.64139	-2.77127	-6.77491	0.813214	-7.52524	4.52178	-4.57819	3.53469	-5.21174	-0.892345	1.5714	-3.84849	-5.14742	3.80105	0.317268	-8.68292	0.525482
1467.59	-9.43534	-2.18769	-0.0737374	0.955887	-3.26482	2.54137	-5.1318	5.47624	-5.34024	-2.48279	2.71768	-3.20454	-1.80269	3.19895	-0.116502	-4.53297	3.00038
1469.23	-18.8512	-0.263437	4.82808	6.79011	-0.938623	6.44156	-5.74356	0.224163	-6.73901	-1.77814	1.06628	-3.82528	3.77249	3.82136	2.38364	-1.9526	2.79991
1470.87	4.74033	5.79397	6.18419	5.58791	-0.535029	3.12857	-2.96716	-2.42486	-7.47838	0.535972	-2.71162	-3.66185	2.058	5.1495	4.85288	1.14492	4.65502
1472.5	0.719628	8.92744	1.56054	4.8718	0.673584	2.01166	0.62072	-3.37708	-5.16388	2.15944	-2.42679	-4.4744	0.902122	3.56385	3.07249	-2.27669	1.76953
1474.14	11.9034	4.80085	3.42933	7.01678	3.43215	0.385366	-5.50856	-1.54152	-1.26367	-3.03765	1.04749	-2.88372	-5.74298	4.50112	-0.496093	-3.47061	2.77559
1475.78	6.73204	1.47706	3.55438	6.76442	6.16033	3.65063	-8.16601	-4.0042	-0.180524	-5.44214	4.71812	-2.74235	-3.86042	4.25633	0.55403	-5.94092	1.16948
1477.42	11.5726	0.683647	2.94828	7.26637	4.72781	3.06658	-5.95539	-1.71372	-0.0244539	-6.09111	1.82341	-2.00555	-1.22942	2.57361	1.46253	-5.26263	-1.19997
1479.05	22.8128	-4.2005	4.08618	5.42844	5.12634	0.777783	-8.43207	6.49324	1.10636	-7.81918	-2.51702	-1.55831	-3.63604	-4.72201	0.372819	-5.76652	1.59494
1480.69	21.9325	-5.38593	6.14198	4.00287	11.5789	-3.17627	-9.89645	8.12108	1.39768	-9.72261	-0.0601164	-2.26892	-3.53097	-5.3876	-0.22132	-3.91526	0.685787
1482.33	16.5222	0.636527	1.92419	6.86203	17.8964	-5.25614	-5.24655	2.22818	1.74676	-6.48142	-2.33903	-2.68906	-0.95079	-6.61298	-1.88901	-3.16958	1.8203
1483.96	37.7456	4.82256	-2.92462	3.39584	12.8648	-9.43722	0.974671	8.118	-1.35428	-6.65296	-3.49041	-3.28222	-3.29329	-7.11295	-2.59008	-2.76293	6.79517
1485.6	18.0725	1.53028	-2.07958	1.61384	12.8685	-5.77906	1.52607	5.99184	-1.91518	-6.93872	2.04412	-0.241474	-1.91063	-3.88871	-3.83343	0.0595954	5.33143
1487.23	18.3515	1.80176	-0.202856	1.11273	12.0784	-5.48985	1.90102	5.80591	-0.490487	-7.01887	6.67952	0.631091	-4.05429	0.146338	-5.76568	1.48166	3.59329
1488.87	6.69707	5.72009	2.03317	-2.94043	9.93534	-5.25746	2.01998	4.56568	1.38602	-5.14757	6.0855	1.92113	-1.82862	-2.87313	-3.89317	-2.09655	4.37906
1490.5	-21.2557	-0.58659	6.65632	-4.50789	11.6984	-0.951044	0.831488	2.13171	0.810871	-3.45154	1.28733	7.99662	-1.79909	-3.44341	-8.07602	-3.79488	0.377707
1492.14	-20.1766	-5.65185	5.90406	-2.6235	6.44481	-0.0344351	-3.09414	5.83626	0.335141	-2.29434	-1.80069	5.63295	-2.85478	-3.26009	-4.54445	-3.99514	-0.0325756
1493.77	-25.2095	-4.91822	4.43144	1.72647	2.7316	0.401633	-5.22311	0.189982	-0.620402	0.532208	-0.484125	3.45078	0.283852	1.9032	-2.0881	-0.486885	-4.81695
1495.41	-22.9319	-4.15933	3.52956	2.12717	2.75127	0.698806	-4.16732	0.534273	-2.26569	0.660745	-1.12611	2.39123	3.93249	-1.03782	0.258111	0.0617862	-2.90054
1497.04	-12.5179	-3.70787	-0.685657	5.66655	2.12321	0.567631	-2.7571	3.5659	-4.095	-1.02964	-0.799428	0.665732	3.153	-0.99093	1.70573	-1.57053	-1.05196
1498.67	-14.5706	-4.30627	-1.4149	10.186	4.25756	2.81852	-2.74532	-1.52804	-3.35137	1.90219	0.525932	2.24761	4.24588	1.35849	-0.236047	0.466464	-3.48913
1500.3	-19.7186	-3.27485	-4.48344	8.49642	0.810254	4.20559	0.422353	-2.93653	-2.86439	5.83086	4.17581	3.99732	5.50663	1.71252	-1.22535	1.78336	-3.70812
1501.94	-32.1774	-2.91641	-4.03369	10.8929	0.811618	2.27388	-0.864642	-2.44295	-2.6045	3.24626	1.82729	8.47456	6.16389	-2.37806	-3.09778	1.02096	-0.457242
1503.57	-36.8915	-5.486	-3.85097	7.21359	-4.56469	-1.11363	1.1495	-1.83405	-3.26512	4.52677	-1.62929	12.9336	5.70068	-1.16603	-5.6163	5.62015	-0.596483
1505.2	-15.471	-3.29362	-5.08788	4.86353	-16.378	-4.81346	4.40117	1.38819	-1.78784	5.00214	-2.75625	14.2477	6.50674	3.20741	-3.23767	8.50112	0.41039
1506.83	-26.2439	-7.47484	-4.85445	4.70473	-19.0395	-4.4356	3.36565	1.76513	0.150638	5.30076	-3.20927	15.108	5.25054	7.17557	-1.84572	11.2208	-1.31218
1508.46	-30.9734	-11.2975	-2.61543	1.38859	-19.4121	-3.37605	3.33122	5.88496	-1.3158	3.67233	-4.68538	18.5748	8.33553	3.50972	0.144773	10.29	-0.0159179
1510.09	-21.7088	-12.3304	-2.87579	7.05068	-19.1216	-1.18957	1.07427	5.5105	-0.992754	4.4533	-6.29779	17.728	7.00414	1.93989	1.28476	5.21921	-2.02173
1511.72	-2.82237	-4.52263	-3.11978	5.63819	-12.9588	-2.91865	2.84354	3.65314	4.90135	1.40669	-4.11084	12.333	2.92975	1.81573	2.33684	2.34184	-2.84569
1513.35	-6.89446	-0.652527	-6.19446	2.28336	-5.99569	-1.53669	-0.626084	3.14282	8.26101	-3.83733	0.22032	8.74474	-1.10899	-0.682229	3.05368	-1.15455	-0.189254
1514.98	-2.48894	7.12516	-7.88508	3.82919	-4.13368	1.43038	-3.67129	-1.95791	9.73135	-10.1013	-0.3552	6.24492	-4.54579	-2.23783	2.73659	-7.12204	-0.208644
1516.61	9.66215	14.4975	-6.77101	-4.92879	-2.27917	-4.45813	-0.704596	-3.11777	13.9143	-11.3621	-3.77027	5.18013	-5.28554	-3.93466	3.79326	-6.10141	0.871561
1518.24	6.51827	12.9473	0.144945	-9.38682	4.12089	-4.96216	-1.34706	-3.9857	14.2877	-12.2832	-3.80186	6.93471	-7.30058	0.375939	4.6124	-4.27438	-0.573881
1519.87	-24.1674	5.33005	-0.685054	-12.9479	5.00312	-2.44092	-0.280709	-5.58059	10.0772	-7.03734	-8.45733	9.87309	-5.48749	0.900023	2.16031	-1.89136	-0.40572
1521.5	-51.257	-1.70787	-2.36425	-13.1895	4.79426	0.728629	0.87912	-6.51831	5.46915	-0.4358	-6.11449	8.03725	-1.50083	-0.567127	1.77839	-0.0390827	-1.61274
1523.13	-62.1601	-11.7314	0.197918	-13.9645	3.98211	4.03426	-2.03848	-4.572	-0.559486	4.46766	-1.52932	5.97306	0.438123	0.760768	-0.757651	1.0962	-2.14004
1524.75	-46.9935	-12.5592	2.37268	-14.8198	1.43295	1.22188	-0.620992	0.184932	-2.53188	6.85403	1.61452	2.59158	3.02829	0.524405	-4.17172	4.43814	-0.894751
1526.38	-47.6932	-12.92	3.02515	-11.3924	2.0475	3.20538	-4.0269	0.282307	-5.59736	6.6527	8.51199	-2.29723	5.28612	-0.226007	-5.80034	3.76252	0.878014
1528.01	-43.6702	-13.6035	3.54331	-7.64793	-2.27506	9.95973	-7.60287	-2.31527	-8.59868	5.72376	12.9281	-7.46478	5.40158	1.98617	-4.36243	3.3704	0.239942
1529.63	-19.4185	-8.46684	5.51966	-8.38179	-1.30117	2.66728	-4.8695	1.0908	-7.06824	4.62504	9.44625	-4.93202	4.96191	0.378893	-5.78962	4.35306	2.63399
1531.26	-14.3329	-8.33767	10.2182	-1.04096	1.71998	2.18544	-6.01514	-0.279054	-7.10862	3.93062	6.02066	-1.1994	5.30544	3.51335	-4.51781	7.11125	0.088966
1532.89	4.48979	-2.65084	3.00793	-2.03554	-0.403955	-1.11288	-0.299669	0.727459	-5.89974	4.50207	-0.892839	-1.58598	2.70671	3.33167	-3.00734	6.81975	2.17451
1534.51	19.1004	3.05361	-0.840613	1.61423	-1.8707	-3.64753	0.721621	-1.66928	0.220294	3.90668	0.424554	-5.8884	1.62033	1.48264	-0.554212	4.31351	0.632297
1536.14	40.0493	7.28517	-1.64799	-7.52011	-3.20214	-7.81647	3.62392	0.172373	2.54129	1.467	-0.284143	-6.77585	-2.43153	1.23471	-0.738373	0.871102	3.3902
1537.76	48.514	10.6324	-1.96727	-6.77145	-6.1841	-6.07644	5.35153	0.356091	4.17008	1.74592	-2.0283	-9.21469	-2.66548	-1.68112	0.847975	-3.94836	0.922125
1539.39	25.122	7.0074	-2.90359	-3.23457	-1.21971	0.282074	1.56504	-2.17235	1.71387	0.098297	0.803653	-9.6567	-1.29326	-3.6241	0.784214	-6.9992	0.68465
1541.01	28.1906	5.00906	-3.79513	-4.83762	-3.41743	1.44361	1.94064	-1.14998	-0.000610657	-1.11727	-0.986181	-9.62866	-3.93541	-3.69051	0.893447	-7.08932	0.338987
1542.63	23.7978	6.45385	-7.37929	-0.703315	-1.62819	1.13307	2.58753	-0.593403	-1.51047	-2.51068	-3.62599	-7.32758	-4.60419	-4.46246	-0.931258	-8.00823	0.680169
1544.26	18.5981	3.17358	-6.51503	0.920641	-0.486281	0.782842	0.891654	-0.715676	-2.05893	-1.41125	-2.33642	-7.07098	-4.48815	-2.91144	-0.0359136	-6.10562	0.38633
1545.88	23.6447	5.09372	-7.14805	1.5537	-3.09462	-0.307521	1.81175	2.1146	-1.88615	-2.71175	-4.51488	-4.59171	-2.18908	-0.954559	0.181322	-4.11094	0.631615
1547.5	25.0602	4.11717	-3.41483	3.54005	-3.15232	-0.891074	1.0768	1.32362	-0.00253561	-4.44162	-2.46625	-5.3095	-0.819721	-1.12312	1.39811	-3.01285	-1.41402
1549.13	37.83	5.47644	-1.5431	-4.16916	-3.10729	-4.89749	1.89193	1.33733	0.655841	-2.14583	0.153753	-7.67954	-2.65579	-1.30479	3.47873	-2.60066	-0.626872
1550.75	22.8745	3.42266	-2.16578	-1.36147	-1.55534	-2.72786	-0.0240694	0.23581	2.00629	1.48896	2.49192	-8.62418	-1.50467	-2.45158	4.22964	-3.5418	-1.87226
1552.37	24.2229	1.71866	-0.353522	-4.71691	3.49319	-5.58206	-1.95955	3.63732	3.00389	-0.0353637	4.01911	-7.61314	-4.67486	-2.51193	1.08208	-2.69839	0.950508
1553.99	37.609	2.08032	2.04351	-1.17082	2.00825	-6.05355	-1.30639	3.05274	3.98571	3.56259	1.84193	-9.8274	-3.57955	-3.19009	0.846109	-1.90392	-0.277897
1555.61	32.1134	0.300873	4.79236	3.5763	2.88752	-2.41797	-4.47682	1.46614	2.06304	5.04707	1.6674	-9.46644	-1.23362	-4.50341	0.336042	-1.09911	-0.847799
1557.23	28.5911	-2.79886	4.27941	9.09203	-3.03925	2.1292	-6.20689	2.73078	-1.79579	6.10413	2.23904	-11.9067	-0.443632	-3.57567	4.63772	0.681529	-0.534134
1558.86	29.9115	1.22167	3.16529	9.97026	-4.40199	2.14	-5.90747	3.61464	-1.73922	3.6988	-1.35785	-10.164	2.57515	-5.23114	4.98127	0.899342	0.035689
1560.47	10.7065	-0.67044	3.91467	4.17872	-1.20346	1.69087	-2.71951	4.83686	-2.15626	1.16753	-3.03802	-5.23333	4.37108	-6.43851	4.73858	0.29451	-0.7394
1562.09	5.60382	2.1926	1.20332	2.06139	0.467096	1.09146	-2.01264	2.0447	-1.53736	1.08778	-2.72519	-4.41893	4.57914	-5.89051	4.23183	-0.570253	0.383283
1563.71	-0.418999	4.633	-2.58918	-1.12104	0.556078	0.285673	0.909355	0.500491	0.668058	-0.541531	-3.34222	-0.560976	3.41401	-4.23821	2.66885	-0.273111	1.47974
1565.33	14.1717	9.77027	-5.33509	-5.14582	2.56836	-5.61278	4.33719	-1.23605	4.84863	0.634879	-4.28131	0.108064	-1.28669	-1.62793	-2.58894	1.52655	2.6618
1566.95	9.44317	10.3128	-5.42967	0.547726	1.78084	-2.6755	4.50156	-6.63375	6.90095	1.50119	-4.63222	-1.56967	0.0927581	1.49797	-1.20171	0.837664	-0.262323
1568.57	16.0902	11.0161	-1.80622	0.749502	1.43891	-3.44216	5.00567	-9.27023	5.62452	2.89503	-3.33132	-3.90403	-1.46295	3.96623	-1.1395	1.40141	-0.416042
1570.19	22.2161	7.6555	-2.63047	0.705149	-4.19045	-3.01177	3.93588	-6.35691	0.354682	4.37949	-2.02995	-5.92604	-2.18284	4.64693	-0.779484	1.68823	-0.681595
1571.81	16.8263	3.80305	-2.65722	1.87403	-0.692658	-0.854161	1.97884	-6.33006	-0.265893	4.13058	-0.569773	-8.54522	-1.96292	1.95464	1.53276	0.155523	-1.51162
1573.42	-4.25571	-3.14215	2.2551	3.68752	4.322	1.88261	-0.56835	-4.19577	-4.03637	0.783066	-0.743844	-2.28831	3.639	1.61126	1.46411	3.52349	-2.43407
1575.04	-10.873	-6.0734	4.18684	2.54494	7.35463	3.7913	-1.76097	-1.26921	-5.92713	-1.92055	0.697979	-0.414744	3.65551	-0.186135	0.710494	2.45981	-1.14196
1576.66	6.61786	-2.38376	3.42361	-2.25942	7.01534	0.662643	0.910756	1.25936	-5.90572	-4.46229	0.041475	1.07771	0.421621	-1.66627	-0.417739	0.256325	-0.876009
1578.27	4.22249	-2.78971	3.31297	-2.30857	12.7159	-2.77837	0.940116	5.05715	-3.24174	-5.78495	-0.63248	2.76981	-0.189723	-3.38928	-2.98041	0.887422	-0.330839
1579.89	7.85832	-0.040785	2.00421	0.191716	10.2458	-3.0882	0.171707	5.65643	1.11834	-7.83863	-0.00520454	0.912357	-0.783784	-2.67316	-0.533067	-0.226842	-0.411088
1581.51	18.8526	3.56186	3.009	2.44011	5.27564	-3.56178	1.78045	4.19152	1.19028	-4.54004	0.260205	-1.677	-1.38237	0.640202	1.90112	1.38268	-1.70704
1583.12	13.565	2.02353	2.77602	2.4733	4.49392	-2.89058	0.831638	6.37966	0.285083	-4.46998	-1.41706	0.512193	-0.742093	0.640076	0.502741	-0.662398	-2.2677
1584.74	7.56412	2.49296	3.10762	4.85927	4.59292	-1.76126	1.3201	3.62793	0.34097	-1.46093	-2.47428	-0.138605	2.30279	1.38151	2.67005	-0.31046	-3.22535
1586.35	-1.38196	1.1635	3.09387	10.7743	4.01746	1.91288	-0.103783	0.830352	-1.92791	-0.892558	-2.68022	1.50117	5.54568	3.18502	2.62518	2.76303	-4.02458
1587.96	-2.32588	0.375259	1.54376	7.2476	0.82117	2.80443	-0.635912	0.101325	-3.41989	0.843791	-0.619126	2.1033	3.52571	2.69648	1.69387	2.25223	-2.7947
1589.58	10.3608	3.60379	0.0427493	3.7447	-1.73707	0.964905	1.80646	0.0576526	-3.42374	0.320561	0.242377	1.68667	0.0926337	2.75468	-0.368029	-0.512918	-2.66281
1591.19	2.73774	-0.0525632	-0.156961	2.10429	-2.21952	2.39604	1.4852	1.44324	-2.91633	1.3735	2.32366	2.83893	2.19753	1.34197	-0.95574	-0.231906	-1.98449
1592.81	-1.48137	-1.7981	-0.450437	5.14129	-3.9111	6.58513	-1.39205	-0.321084	-1.48069	-0.847837	3.96417	0.158437	1.90211	3.19281	0.780168	-0.263092	-0.516101
1594.42	-10.1373	-2.69289	1.02341	5.02891	-5.93774	10.3402	-0.652153	-3.42775	-1.94652	-0.188513	3.60485	2.98378	4.1392	3.77494	0.964348	0.458459	-0.19159
1596.03	-11.9921	-3.21891	2.77047	2.38616	-4.90278	10.3589	0.225827	-2.76257	-1.86141	-1.30921	1.32355	4.40319	4.47885	2.43771	-0.443054	-2.7595	0.617261
1597.64	-8.90685	-4.79609	2.89809	2.06053	-5.08096	10.4215	-1.27335	-1.28379	-2.1499	0.18014	0.937525	2.34961	2.81767	0.401991	-0.00287061	-4.67479	1.02579
1599.26	-9.05884	-6.00026	2.50561	2.74177	-2.30292	7.99219	-1.59186	1.40948	-1.81219	-0.131954	0.0604527	3.96835	0.01454	-1.78892	0.173869	-4.8076	0.0714415
1600.87	-17.7302	-6.91447	0.935338	2.05732	0.7495	4.74792	-2.35938	1.83763	-1.847	0.366313	-1.0554	4.98009	-1.62037	-3.15063	-0.378045	-1.78234	-0.343649
1602.48	-1.51298	-2.79837	-1.74581	0.443658	-2.83368	2.96264	0.461824	1.4053	-1.08309	1.65939	-1.5253	3.45562	-3.6208	-3.27673	0.398351	-1.08404	-0.816569
1604.09	-7.7836	-3.4888	-4.11815	4.32742	-2.84177	4.20353	-0.136112	1.9388	-1.86226	1.27788	-0.618985	1.63587	0.395997	-3.04171	1.2726	1.89233	0.0104943
1605.7	-16.0929	-3.6982	-3.75518	5.72799	-1.33149	4.09437	-1.10971	0.404316	-1.30804	-0.24729	-0.708066	2.17635	1.28373	0.405185	0.207029	4.32733	-0.24889
1607.31	-26.0682	-2.32325	-3.80367	3.20376	-1.4352	4.27544	0.704627	-2.6338	1.31046	-1.53193	0.760321	2.43521	3.54013	0.72688	-0.490332	3.5474	0.331518
1608.92	-19.9297	0.433943	-2.43546	2.59052	-2.50425	4.26303	2.6813	-4.59359	0.875166	-2.681	1.67751	1.2334	4.21141	4.11101	-2.59416	1.31684	-2.67553
1610.53	-19.5271	-0.509941	-1.52639	1.62187	1.69574	3.84593	0.211762	-1.55532	0.117343	-4.43221	1.89029	0.300993	0.737763	3.69318	-3.61387	-1.88714	-2.81207
1612.14	-28.5093	-3.47173	0.841408	1.41677	3.00327	3.619	-1.91628	-1.25934	-1.26972	-3.85991	1.60575	3.45313	1.89319	2.87979	-3.70129	-1.31133	-4.35431
1613.75	-43.2421	-6.93969	1.21569	1.77711	4.41879	5.86214	-2.06179	-2.26041	-0.849474	-0.550079	0.0841812	5.4162	4.75814	0.603548	-2.17244	0.57578	-3.96134
1615.36	-37.1381	-7.99865	-1.36842	0.648932	4.25272	7.88444	-3.26138	-3.27107	-2.07141	4.52245	-0.62524	3.52266	1.39518	-1.7983	-1.10126	-0.894161	-1.68789
1616.97	-29.4974	-6.93238	-2.4396	-0.422286	7.35781	4.68835	-1.57582	0.226353	-2.47275	5.12421	-2.85579	4.25083	0.576664	-3.74089	-3.10357	1.39248	3.45254
1618.58	-23.105	-6.96111	-2.60809	-3.00504	4.74589	1.28292	-0.87377	2.3043	-2.73026	4.91862	-1.58774	5.34504	-0.946332	-4.28106	-3.76749	2.21357	5.07034
1620.18	-7.38986	-4.15461	-3.03038	-3.43385	3.55494	-1.48762	0.138007	2.54327	-1.24293	1.26703	0.031149	1.91681	-2.63349	-4.56079	-2.23691	1.70157	7.52862
1621.79	12.0877	-0.728119	-1.98434	-2.82462	-0.338493	-3.92801	1.59477	4.02069	-3.66665	-1.29634	1.68978	1.01982	-2.09633	-1.97166	-1.76601	1.51844	5.84553
1623.4	20.8922	0.969728	0.262869	-4.72765	-0.720978	-7.17267	-0.395356	5.14021	-4.19051	-5.38372	1.445	2.1818	-1.26433	0.0585396	-0.658032	3.54439	5.88884
1625	25.5901	-0.152364	-0.204364	-2.94949	-5.62394	-4.37383	-3.65934	2.52415	-5.42375	-5.96998	1.81372	0.194571	-3.16091	1.05994	0.913581	-0.0647533	3.19999
1626.61	11.2304	-3.17134	0.278237	-0.910927	-5.17855	1.9658	-1.1265	0.0453782	-0.876919	-2.32191	2.12651	-1.68993	-1.43446	-1.60893	3.98077	-5.7353	-1.25828
1628.22	9.12064	-3.39173	-1.92151	0.00787621	-6.37391	1.81762	-2.19313	-1.64392	0.0795705	2.44271	2.41818	-4.46194	-2.314	-2.77846	3.41199	-5.68132	-1.75464
1629.82	16.1927	-0.425638	-3.95964	-7.30967	-3.20792	-4.95616	4.3141	-1.39541	7.34572	8.02892	-5.34025	-1.84229	-4.84271	-5.17324	1.27183	-3.26351	-0.865653
1631.43	-2.26448	-5.83492	-0.805251	-3.85898	-5.40433	-1.90292	0.409234	2.96453	6.60108	3.86972	-4.23678	3.04043	0.110943	-4.85836	1.1432	0.142344	-1.2413
1633.03	7.9593	0.450217	1.40905	0.298863	-1.55014	-3.01122	1.48368	-0.726284	8.53859	4.3897	-2.97762	0.186235	-0.0487133	-4.34307	2.86241	-0.314026	-1.0733
1634.64	-12.7469	-1.73725	3.6365	2.61869	1.80736	-2.14377	-1.76744	-0.574809	6.1942	0.472409	0.704986	2.55115	2.16915	-2.78313	2.8785	3.61589	-0.610847
1636.24	-12.4676	2.95451	3.33549	1.1721	8.87644	-7.92327	-3.65089	-0.778692	8.16924	-3.71472	0.786703	6.98523	0.683766	1.88436	-2.19168	8.53074	3.03681
1637.85	-4.54786	4.12628	5.78917	1.60874	10.6249	-7.35535	-7.35463	-1.85445	8.33598	-8.53731	4.9841	6.97284	-3.53732	4.1025	-2.81188	6.77301	3.81073
1639.45	3.87028	7.60334	6.1029	0.781907	8.37008	-3.58636	-6.32327	-3.70807	8.60491	-10.4696	12.2741	1.63191	-5.55463	5.88882	-2.54557	2.57094	5.89561
1641.05	12.7518	7.70128	3.91283	3.19219	3.61435	-3.07214	-8.85369	-4.50158	8.32808	-13.4931	17.8481	-3.59698	-1.72659	8.20563	-0.815365	5.26277	9.20972
1642.66	29.2732	8.99332	3.47357	-5.83037	7.13195	-11.3836	-1.98355	-5.74144	15.8574	-8.34065	10.0107	-4.88563	-9.1536	5.7381	-0.352002	0.895679	6.24149
1644.26	45.2021	9.34895	2.27773	-4.67788	-1.07767	-8.18274	-1.7811	-2.30331	15.1668	-9.11279	9.37468	-4.83948	-8.00403	6.53501	1.42867	-3.96026	2.97833
1645.86	44.0674	9.12769	-0.20819	2.61238	3.88969	-7.11208	-3.97107	-5.51366	12.606	-2.23332	9.49983	-10.3315	-10.3025	5.13172	-1.26669	-9.10541	-6.007
1647.46	53.1652	9.64485	-0.0833301	1.74554	3.34766	-14.164	-3.55858	-0.341559	7.30229	-0.552729	6.76772	-12.6342	-9.86737	3.43696	-3.08487	0.363157	-2.23122
1649.07	24.3501	6.08026	1.36447	9.81745	-0.102409	-2.11089	-3.18967	0.700275	3.51396	5.0691	0.895137	-9.75334	-4.63585	0.709202	1.23162	1.40266	-4.03313
1650.67	22.2525	-2.25364	1.73546	4.64309	-7.8244	1.62497	-3.0082	6.43137	0.522174	8.94262	-0.410232	-8.24525	-3.48	-5.38532	2.58396	-1.04038	-1.99882
1652.27	-5.68587	-6.7768	-6.04798	-5.50832	-15.3347	2.93213	-0.0454567	12.1426	-8.44072	11.4171	0.0433028	0.757591	2.14881	-4.85691	-2.44343	0.562139	1.23117
1653.87	-31.3454	-7.94528	-10.1191	0.301602	-15.8972	8.54413	3.8681	5.78125	-4.99113	10.3295	-1.85824	1.54571	8.69058	-2.82529	0.949198	-0.84759	-3.33261
1655.47	-26.6253	0.285998	-5.17164	4.30655	-12.6207	2.04793	7.02556	3.85686	-1.29695	7.30893	-1.81006	5.94036	7.86732	-0.328968	0.147006	5.28373	-5.14848
1657.07	-39.2328	-2.30229	-5.88746	5.20344	-8.87457	5.13024	2.51248	4.57977	-3.19657	3.93628	-3.82493	8.91372	10.6323	-1.02446	2.81142	7.22547	-4.37085
1658.67	-26.5555	3.14973	-1.18172	-1.4852	-1.48863	-2.98737	1.27414	5.0607	-5.1104	-6.32244	-2.08171	11.0242	7.29433	3.77198	-4.29277	8.44361	-2.84518
1660.27	22.4927	17.7473	-1.30262	-18.6608	-9.48509	-16.7448	13.1921	5.44088	4.07996	-2.58123	-9.23391	5.80154	-10.3947	1.93803	-7.57034	6.66495	6.72556
1661.87	-32.324	14.9354	6.08085	-8.93939	-11.3096	6.42964	2.79012	-6.7799	0.354011	-4.60813	-6.62288	4.1104	-2.80232	0.639895	2.1544	-2.81012	2.31469
1663.47	-11.6454	14.4691	8.94605	-18.4164	-17.692	0.834106	4.67991	-2.82235	-3.49906	-0.107854	-6.45017	-0.0702018	1.53169	-2.07606	-3.80645	-9.02203	10.1315
1665.06	-37.3666	1.64293	7.92562	-17.3893	-21.1482	12.1869	-2.13211	-5.33812	-7.63219	3.58309	2.21405	1.10682	3.06571	6.02576	-4.04925	-6.27336	-0.202846
1666.66	-31.4375	9.21408	2.89794	-10.528	-4.25413	4.69394	3.70708	-18.2789	-1.73107	14.5524	0.320882	-1.30049	-0.819902	4.68802	-1.37303	-4.74919	-4.41662
1668.26	-46.8461	0.755397	7.05671	-2.13464	2.63794	6.38191	-5.13236	-17.7437	-5.18579	14.1663	6.78197	3.50887	1.75053	4.76459	-2.5399	3.15127	-1.7517
1669.86	-24.6204	-4.25747	8.03539	-0.87685	3.57144	2.44931	-13.5721	-10.7205	-12.7217	14.3156	6.08347	-0.0448044	3.37764	-1.92488	-0.152158	6.45642	-1.41213
1671.46	-13.7765	-1.99857	9.44829	11.0407	3.60986	0.597866	-8.10462	-6.4015	-9.68932	1.3871	2.03196	6.55279	4.44421	1.3373	-1.69145	5.20971	-5.09565
1673.05	27.6596	3.90425	4.70052	-5.9577	-2.71466	-9.43883	7.02177	2.17804	4.73436	3.18826	-13.9044	3.8074	-16.9446	-5.08802	-6.87077	-3.25681	0.220419
1674.65	-6.08226	7.73329	12.8548	12.91	3.4671	4.66133	-3.9605	-9.71412	2.17158	-1.01691	-7.5095	2.9405	1.31152	0.578664	0.502865	1.053	-5.19241
1676.24	19.2526	12.0524	9.42595	14.0034	-7.76563	5.72892	-2.44209	1.35334	6.55056	-6.97202	-1.67464	-7.3523	15.664	-1.42175	6.95211	-3.72259	-0.112007
1677.84	54.5089	10.6134	20.9274	16.1448	2.83594	3.23274	-10.935	12.5367	1.50052	-12.658	7.8092	-6.5412	9.76935	10.5091	6.0805	1.65858	-10.527
1679.44	72.2874	20.1346	21.4294	7.33125	28.3847	-17.602	-4.23322	13.3816	-2.1822	-10.4902	13.1838	-4.52599	5.15413	11.6273	3.78337	5.091	-8.17873
1681.03	52.6622	18.9086	23.788	10.343	39.4161	-17.3749	0.698073	11.2818	2.53525	-7.97447	8.33007	-3.96294	4.49134	3.07063	0.668714	3.42617	-0.949291
1682.63	-14.763	16.1527	20.3842	23.1978	38.6662	-3.69282	-6.27259	-1.82233	-5.74416	0.773377	11.9751	-9.63608	17.2594	-4.17359	2.55245	1.75972	-3.16898
1684.22	13.3738	12.194	4.00996	26.1693	10.5708	2.1191	4.50831	-0.35534	-4.56635	3.57532	4.54901	-7.553	7.79547	-8.54159	2.68756	-7.99689	-3.41203
1685.81	41.5759	3.45352	-0.649513	-0.350205	-5.10985	-6.33253	12.5226	10.5998	-0.908045	13.8799	-5.43754	-10.9626	-6.69757	-12.3713	-0.295678	-10.0982	2.61845
1687.41	3.60942	-3.5951	11.5043	2.43292	4.99771	-1.32838	5.06984	7.45842	-0.570963	9.81682	-5.39509	-9.05384	8.7807	-12.8904	6.14396	7.67381	1.06389
1689	-12.9886	-9.14559	-15.425	-0.545647	-12.7013	12.2063	-0.727423	5.35357	-3.71791	6.1785	-5.74659	-9.9765	-1.49184	-7.43046	4.73036	-2.44706	-0.123126
1690.6	35.6263	-1.87441	11.2816	0.0932692	-7.29026	2.92879	-3.3046	9.36616	-14.8497	-2.71896	-4.51378	7.97714	-6.85443	11.2411	-0.333669	3.05799	-17.884
1692.19	37.2606	9.87055	4.67682	-2.30607	3.84501	-4.34306	-1.75921	9.32441	-6.56958	-18.5768	5.30176	7.44096	-16.041	10.9928	-5.03852	-6.16494	-4.56745
1693.78	8.28622	19.5425	-1.41394	7.0505	13.6561	-4.09485	15.5196	0.824312	7.98484	-12.3601	-0.849769	1.00029	-6.01837	-5.3456	-2.71475	-8.03061	6.93216
1695.37	-47.0574	6.58977	-3.643	4.8746	3.60301	13.4849	13.0598	-10.4693	-0.891829	2.26997	-2.40725	10.2941	11.4057	-4.6221	-2.02418	-4.78722	6.46539
1696.96	-12.2779	-5.8025	-10.5123	1.10545	-11.0717	11.0333	2.68134	0.802867	2.44256	0.932216	-0.158084	0.77304	-4.3862	-15.0419	10.9097	-13.3051	6.62196
1698.56	-58.2698	-26.07	-2.7246	3.37352	-10.4941	21.9469	-9.87671	6.45641	0.861481	5.71422	-4.27964	3.96982	3.40972	-18.9025	13.8434	-10.9968	4.5393
1700.15	-96.4582	-25.9754	-0.749294	2.12994	0.95533	19.1156	-8.89054	-0.654537	4.12423	4.64764	-2.06001	9.15974	16.8358	-17.0361	8.81772	6.12962	5.41
1701.74	-84.21	-21.5558	-11.1208	2.02123	-21.1988	27.1037	-9.67104	-7.2241	2.33539	6.35108	-1.16364	8.22512	5.96514	-7.19349	4.82408	-5.14721	-0.253737
1703.33	-36.683	-9.74052	11.2394	-1.58567	-7.45966	13.5398	-13.445	-3.14056	1.18042	-8.79601	9.27848	14.1055	3.73898	6.99704	1.00171	6.03537	-3.75686
1704.92	-4.86491	5.8115	1.65625	-12.6897	-2.81951	-2.64874	-2.5351	-4.906	11.0083	-8.01862	12.2416	6.30766	1.14722	8.33089	1.3065	12.667	5.98227
1706.51	48.7002	9.37521	2.81094	-18.9639	0.15845	-10.4263	8.69656	-0.937874	13.5805	-1.8432	7.03732	-6.00401	-3.70083	9.21611	-5.95746	15.6999	12.6922
1708.1	43.4428	4.09975	10.1011	-29.5317	3.19071	-16.9286	8.03794	4.75133	-1.52012	-2.01505	3.99581	-11.1873	-7.81082	15.4832	-1.99329	16.5399	12.9749
1709.69	28.5512	-1.82368	3.23193	-7.21726	15.3099	-17.0197	-9.30662	4.62062	3.9246	-9.62755	1.49455	-18.4244	-18.0564	-2.25744	0.0601315	1.02055	3.53416
1711.28	37.8154	0.379942	16.8003	-14.2565	7.82237	-3.64453	-6.56245	-0.559301	-4.13893	-9.91206	6.32189	-2.84183	-5.5103	-5.43777	-8.97015	4.47628	11.5314
1712.87	-12.1128	3.10769	-1.01478	9.64597	4.47699	6.99744	1.96783	-10.9556	-2.7126	-4.11507	4.48399	-5.13711	5.4425	-3.56523	-5.12494	5.40387	-3.5645
1714.45	-7.49401	5.05786	2.24811	20.3147	-4.98971	9.541	-2.21233	4.63272	0.499014	-7.1501	5.6169	-6.43518	5.38583	-13.8011	1.24123	-13.7432	-7.80624
1716.04	-15.1649	7.02315	-0.432921	10.3534	7.47423	0.330554	-1.68828	10.2465	0.2214	-11.3462	-0.236005	1.69722	-5.5301	-10.798	-6.72196	-13.8212	-3.42954
1717.63	-9.11135	8.99999	-8.45637	8.33852	3.10019	-1.95811	3.63737	-0.705493	6.51307	12.8198	-12.5391	2.8862	-3.94495	-6.73294	7.3784	-8.82976	-16.3903
1719.22	40.9192	-3.04198	-3.84817	-3.86004	-6.09633	-3.19264	5.85923	11.0025	5.54895	15.1131	-25.0099	6.32926	-6.90017	-14.5908	5.51483	-7.44881	2.42065
1720.8	-8.09453	-11.2172	-3.42368	3.80392	-17.6246	10.3891	9.35718	3.06657	-3.05888	15.7239	-8.47688	1.97297	5.70456	-8.55758	13.5695	-6.41451	-0.800819
1722.39	-55.1673	-23.8515	-7.98233	15.1482	13.1611	15.1006	-3.62311	-9.07337	9.66207	6.24241	2.58773	-12.5224	6.97371	-11.6026	11.6609	-9.04401	-6.08667
1723.98	26.1432	-13.7548	-5.54902	-23.4604	-25.3561	2.41908	14.0398	10.8007	-0.421382	-5.29407	18.8366	-4.35901	3.30643	3.60681	-8.76402	-0.103551	16.5546
1725.56	-9.17346	-6.82183	-32.0302	-23.4739	-21.7252	0.0782724	21.5043	12.4472	9.92634	1.21278	15.0179	-9.87962	-0.38623	8.237	0.773608	-0.560638	4.09205
1727.15	14.9296	-1.44521	-19.9345	-5.08675	-12.7882	3.11248	7.70593	9.21572	4.13962	-3.60765	13.5972	-5.91395	0.0255258	2.29687	-0.6614	-1.26757	3.87915
1728.73	-46.8736	-18.6628	-20.4559	-2.45762	-1.0113	5.33258	-0.94024	23.8991	-6.35441	-2.40565	-6.37868	6.21562	-9.80245	11.0557	-6.40937	2.85754	-4.50215
1730.32	-45.7592	-12.6494	-15.0006	3.28277	24.3358	-5.49372	-6.61398	12.7246	-3.23989	2.22367	-12.2165	17.5262	-11.0779	12.0396	-12.4006	3.77949	-11.2677
1731.9	118.503	1.95429	-10.2201	-6.23912	-5.9659	-16.4623	14.5731	20.2219	5.1937	8.8157	-26.8305	3.41796	-36.2013	-4.94243	-12.2384	-2.84834	15.3187
1733.49	82.0463	0.525097	-11.6501	8.1253	-15.8719	2.1773	12.2011	-4.6191	3.61132	11.1396	-2.09309	-7.56384	-21.0576	5.89726	-4.28869	-1.78571	-2.78869
1735.07	-22.2016	-16.1273	-2.8253	5.12985	10.5339	15.6515	-14.5467	-19.4734	-3.47757	9.39607	20.9593	-17.7073	-6.46807	6.89763	-5.49493	5.63275	-8.12917
1736.65	80.6161	17.9261	-0.0388323	-19.4954	-8.42145	-13.6748	3.74544	6.85027	-8.30653	-16.408	5.71732	-13.4012	-4.23425	0.468967	-1.77967	6.1129	4.98499
1738.24	75.295	29.3855	3.89438	-15.9553	18.9704	-26.2908	5.6944	-3.58482	7.05254	-5.64887	1.83473	-18.7927	-6.37507	-9.97261	10.2707	4.50068	8.47715
1739.82	130.955	31.9438	4.57272	-2.02297	-5.76638	-14.0536	9.51996	-17.539	-9.48918	-5.1207	6.61437	-26.5559	3.95859	0.0488555	6.82079	-0.605177	9.83712
1741.4	51.6687	5.28189	2.64431	7.32886	16.1358	-2.48221	-4.68994	-0.390299	-0.54569	-10.4661	10.6726	-20.45	6.33281	5.08716	-5.67382	-9.64479	3.2304
1742.99	-34.3057	-2.61431	-7.80034	20.9648	20.7493	9.746	-3.85626	-11.6068	5.08964	-4.9331	-5.54645	9.77271	23.5185	-11.8801	-9.20609	-2.65066	5.28949
1744.57	-12.5297	-6.24088	-3.9483	9.0037	14.5719	12.7434	7.15993	-6.74995	11.9675	-6.35909	-1.74958	8.67681	3.94043	-8.75463	-9.31642	1.00103	9.46414
1746.15	29.3032	-4.71871	-9.82583	-11.383	1.94104	-8.48045	2.61886	5.50113	11.0125	-11.3647	19.4546	2.765	-5.2088	9.51504	-5.07049	12.5382	1.26529
1747.73	11.9766	-5.18547	-1.64039	-22.637	4.64848	-8.20926	-3.67204	1.20399	-2.2723	-2.24617	15.8688	8.30936	-0.708116	11.3248	-3.2162	8.83728	-3.76511
1749.31	-4.97063	2.85675	-4.46074	-25.7892	-3.34151	-19.5221	3.74895	0.644597	5.37071	3.29313	-0.179349	5.84732	3.95912	-4.86365	16.5409	8.14085	-6.95834
1750.89	-3.66275	15.075	-4.18797	-8.87094	-5.53643	-11.8754	9.68193	-9.40909	-5.97647	10.6442	-9.03531	-6.88728	-9.78484	-8.24363	11.4466	-5.12112	-1.97273
1752.47	58.8699	18.9572	-2.47492	-7.37897	-8.98902	-22.9088	7.12876	12.4582	-14.7698	-18.39	0.019941	-19.8511	-22.4245	4.01356	11.9099	4.37076	10.006
1754.05	37.2945	23.7868	-2.1142	0.0996643	-3.5102	-12.4139	7.26412	-5.26232	-5.69042	-1.52799	4.06369	-15.162	-3.35279	5.44344	6.69342	5.91059	-6.16625
1755.63	25.2824	13.7915	-17.8137	0.584265	-27.341	-1.20356	-0.817163	-1.48064	-12.2981	-3.88175	-10.2014	-3.01599	-4.55747	3.33044	2.97351	5.84286	4.16675
1757.21	22.5056	10.0626	-10.0288	-17.3555	-21.6698	-5.73611	-2.73291	2.92476	-4.08171	-10.0821	1.0735	-8.539	-13.445	3.12126	-2.48018	-3.96763	3.19673
1758.79	91.4927	12.0546	-2.14517	-28.5859	-9.62804	-26.4174	0.944085	16.1953	-6.50674	-19.0846	2.10902	-6.46076	-21.4393	10.5851	-5.22794	-0.539843	-4.127
1760.37	20.1151	-10.2769	-6.63241	-16.4371	-12.7528	-5.12165	-4.12685	-5.85133	-14.2461	4.96678	-12.8414	12.9031	-2.57543	4.42654	6.16174	5.73524	-2.79362
1761.95	-60.4981	-16.58	-2.38375	-15.0651	-28.4871	-1.69223	-2.95536	-8.66102	-14.7102	16.5868	-16.4626	17.1345	15.4354	-8.2397	15.9885	8.1209	1.27249
1763.53	-48.6919	-1.16644	0.774156	-9.02157	-20.2217	5.95533	7.2786	-13.9444	-11.8801	20.3251	-11.646	11.1497	1.97602	-15.049	13.694	-6.89755	-5.97692
1765.1	-40.673	12.5359	12.2545	-10.1922	0.0766558	-14.1555	2.84527	1.44593	-11.5728	-5.48926	3.58572	3.52314	7.57688	-2.77526	10.6572	11.609	9.94534
1766.68	-44.1032	10.6433	9.33218	-15.8657	12.4823	-21.4903	3.00789	-1.28832	-3.24056	4.67576	8.5927	7.06917	10.9553	8.11405	6.41995	22.2413	-5.08161
1768.26	-16.5156	-3.47191	8.58819	-9.4872	-4.95073	-13.9144	-10.1836	16.2613	-11.7668	-16.7234	-4.12396	7.97049	6.71509	9.31092	-4.14885	15.6921	5.35255
1769.84	8.54906	5.60856	18.9591	-7.03798	-14.6076	-1.97259	-7.22633	-1.89325	0.464428	-11.5218	5.88867	-9.95159	10.1322	5.37988	0.104433	-4.04321	-7.42826
1771.41	22.8606	0.369076	4.13937	8.53637	5.09798	-9.49085	5.18871	-4.68719	-1.80147	-4.81999	-6.03115	-6.64047	8.94473	5.2026	-8.56684	-1.58838	-12.9047
1772.99	10.8886	-9.06524	-5.1307	-11.055	-0.202662	-17.9135	9.23877	-1.6798	-1.41541	2.46171	-12.0114	8.7818	10.1027	2.74118	-10.718	11.5869	4.03998
1774.56	19.1303	-9.82	4.32222	-7.19987	-10.3864	-11.7304	7.99131	-0.907047	0.714556	-0.00892337	-10.2467	4.35281	12.9886	5.09607	1.61285	-3.99345	0.666782
1776.14	39.8914	-6.72543	4.72293	-4.07052	-16.557	-2.19025	5.9791	-9.88906	7.77493	15.6286	-4.43055	1.09537	-1.57325	9.32699	7.07346	-18.6171	-12.6021
1777.71	-18.929	-6.70044	-2.37181	2.92772	-6.45233	0.0735684	-2.94734	-2.60728	1.1732	6.42034	-9.64669	7.19687	9.77176	6.39265	9.61818	-7.38768	5.31107
1779.29	-27.3357	-9.3715	-1.45059	-12.4811	-1.8244	-6.91617	-7.80948	2.51618	8.8762	-5.17159	-0.114399	16.4628	0.18019	0.522716	5.56544	4.33446	9.70166
1780.87	-45.8798	-15.7367	-7.80556	2.41967	-8.28743	9.06514	-6.89559	15.8443	-2.72726	-0.457358	-2.83553	21.734	7.46083	-2.45743	-11.3511	-3.70767	11.8935
1782.44	-17.9273	-6.76802	-12.911	-0.402752	-27.8976	29.2226	-2.04234	-9.25643	-2.39128	19.8668	-4.27498	13.8063	0.404289	-13.1257	-3.32778	-4.10603	4.86558
1784.01	6.14393	-6.45202	-16.6828	-2.11891	0.879782	1.09871	6.27684	-4.7221	5.07667	27.0611	-8.34492	8.51745	-6.88403	-18.5235	-10.2112	8.17413	4.23664
1785.59	-32.2578	-28.6428	-9.91156	-13.1708	-0.790735	1.5161	-1.61904	1.89157	2.24713	24.2584	-3.18268	11.9935	-1.02909	-2.67916	-12.8822	28.8762	8.00936
1787.16	-35.4151	-15.0469	0.325458	10.3993	-16.4124	19.0387	-2.23715	-21.5574	-0.567402	18.3359	1.95281	3.22763	18.7826	13.8349	-4.39376	5.2877	-10.1376
1788.73	-36.0125	-19.007	1.63952	12.6208	-6.80675	13.905	-3.39685	-16.5948	6.63798	20.7938	-6.51075	-3.35209	4.74536	14.1804	-12.4376	-9.72674	-16.2909
1790.3	-36.291	-8.6882	-2.87684	16.8443	-2.54376	1.08379	-2.84612	-6.16991	4.11064	4.90415	-5.8369	5.30241	11.1193	14.7183	-10.581	-11.3398	-3.87452
1791.88	-12.7073	-4.85803	3.65563	6.75837	-7.84022	-0.150303	2.00111	-13.7596	5.76407	-6.59634	8.02816	3.07146	10.4561	10.6619	-7.20203	-1.96319	5.8742
1793.45	49.7161	8.93221	-6.29657	15.3123	-4.35382	-0.757388	6.2556	-4.97267	-2.4605	-7.65244	3.16071	-8.49899	4.21342	10.3144	-4.1242	-6.05487	11.0466
1795.02	27.063	9.55262	-9.09049	11.0338	4.54026	7.03876	7.95985	-15.2063	-6.44987	-8.23739	0.628304	-9.38721	-2.41138	-3.58754	4.04494	-13.5432	-1.32383
1796.59	85.605	22.4153	0.972944	-7.22138	13.7952	-8.77552	14.4717	-8.80251	2.49131	-5.885	-5.2663	-3.54313	-14.9146	-4.30845	-1.91512	-11.4761	0.884966
1798.16	61.0323	3.46964	-14.61	-7.48567	-5.05004	-0.530216	5.63967	-5.18273	2.35552	2.93972	-3.43339	-13.6533	-17.2471	1.88148	3.2188	-3.01335	-4.60884
1799.73	-13.0396	9.44555	-10.9724	0.210469	1.86186	2.93538	10.7828	-17.1788	8.08999	-5.88262	-4.83076	-10.4923	-7.32108	8.61019	1.90726	-4.17366	-12.6921
1801.3	-14.1837	8.10449	-4.04729	12.4079	17.4552	-5.60954	10.6502	0.939437	11.0303	-6.38707	-4.72538	-2.21805	-12.0839	3.07089	-15.1464	3.57682	-15.512
1802.88	-0.889865	9.34499	1.1041	8.04537	6.7178	-4.60245	3.875	11.1095	0.645607	-11.32	2.43023	12.455	-6.15412	3.18046	-5.89952	2.68162	-9.81339
1804.44	20.4923	1.35914	-5.48968	4.86027	12.7883	-2.91933	2.6055	-0.755142	6.89361	-1.1203	-3.50775	3.31794	-25.4941	-7.7522	-4.72739	-13.077	-2.46771
1806.01	38.7795	-0.181813	-3.41963	-3.82765	5.56901	-6.75518	-2.2701	-2.63882	0.036336	-6.96377	-3.38451	13.5521	-17.8755	-7.53847	0.524919	-5.65927	6.30567
1807.58	44.2421	3.62121	0.586024	8.80998	-3.20669	-5.97098	7.68045	0.515659	-0.110327	-1.18539	-4.48812	1.18496	-1.25987	-8.64466	6.52684	-1.37312	-2.24801
1809.15	96.3424	12.8618	12.0321	1.91887	-18.105	-4.40578	10.8841	3.34155	0.00310706	6.22395	-7.09228	-2.31018	-4.27649	6.08532	9.21829	3.41863	-3.21332
1810.72	25.1644	2.62386	6.62388	21.4867	16.6014	2.63448	-0.380698	-10.2024	0.376533	4.68932	-5.53371	-12.2287	-0.484439	3.7924	2.74948	1.74564	-11.2031
1812.29	-6.86838	7.47683	8.70867	8.10078	17.3112	-5.85571	-1.47406	-16.9978	2.43786	0.0432641	4.90394	-10.1387	4.41034	6.23988	-8.01299	8.4136	-2.99006
1813.86	-19.9259	-2.49762	10.9381	25.0046	30.2949	1.23494	-8.04091	-1.77346	-1.7774	-11.6847	10.6893	-15.1231	3.75904	0.68761	-13.1642	6.71976	-2.31384
1815.42	-49.081	-7.07587	10.8939	16.3159	10.3318	18.1608	-9.17905	-6.33085	0.920057	-6.27426	8.18625	-9.96172	15.1384	-2.31988	2.15173	0.979396	-2.58332
1816.99	-7.63241	-3.57166	-2.57405	18.5692	-1.0322	18.234	-7.90947	4.59658	5.09723	-4.1177	-0.972921	-13.3726	4.92111	-6.06715	-0.952267	-14.7376	4.96872
1818.56	-54.4508	-16.0974	-13.0853	-10.6517	-22.8056	15.2161	-7.88638	14.979	6.81131	1.47327	1.58041	12.1763	11.2794	-1.77195	8.02554	5.62037	8.11137
1820.12	29.953	15.4926	-9.11988	-17.2278	-31.7441	-0.808918	13.8362	20.6836	10.2436	3.98341	-3.06808	-8.30495	-3.45759	-10.5966	15.0178	-15.3129	5.34613
1821.69	87.8838	14.0782	-0.224459	-31.8838	-24.849	-22.6225	5.36309	23.7548	-4.23983	16.7726	1.53815	-8.80595	-18.8974	-1.85118	9.54513	-4.94349	6.72148
1823.26	-5.32138	5.97969	8.87232	8.66159	29.5936	-22.6374	-10.0797	-2.18777	-13.8993	3.43851	-5.95636	-0.938987	-3.36263	7.34814	-6.02631	8.91233	-4.54673
1824.82	26.5084	15.6705	4.10317	2.07831	1.75893	-20.0837	3.87034	-10.0753	0.202631	5.21389	0.934973	-3.05696	5.14152	10.6808	-8.41581	18.7584	0.232774
1826.39	46.6415	-2.37778	-0.684098	-15.2361	-4.35867	-15.736	8.2573	3.50612	9.07411	-1.08597	-11.3011	-8.34319	-5.27022	7.39871	3.97894	12.0486	9.50017
1827.95	93.8826	-4.00128	-10.6615	-24.0043	-31.3641	-20.3551	15.1568	11.3883	13.799	3.27974	-20.6926	1.21122	-10.3856	10.3002	-3.67181	6.47709	15.3231
1829.52	111.358	3.33708	-19.7176	-26.9793	-37.8705	-23.1132	13.7255	21.0033	15.6607	-3.38665	-15.276	1.34749	-20.7349	11.0374	-2.01159	-8.62686	15.0323
1831.08	-18.9148	-23.9551	-5.17483	-21.8437	-24.1974	7.00154	-4.63367	11.7533	11.7452	4.13064	4.93346	7.77331	-8.61106	4.46283	9.4719	-1.74986	-2.33347
1832.64	-31.5975	-21.6331	8.09029	-17.3857	17.3914	5.91122	-14.9642	7.27314	-6.0471	-5.43194	10.5487	7.17488	-10.8928	-0.323796	2.74152	-12.7994	-5.02389
1834.21	-88.222	-41.2259	15.1265	3.02029	27.9204	15.7675	-24.9748	2.82011	-16.8765	7.02616	6.94567	8.15319	1.15818	-2.4699	2.12634	-1.88735	-16.675
1835.77	-61.0666	-16.2749	17.6794	8.70139	27.7519	2.28758	-10.2747	-3.42856	-19.5563	1.13481	-3.81262	7.86347	11.8095	9.48904	-1.74621	5.32093	-16.4
1837.33	-3.20491	10.873	-1.32589	35.9127	17.2903	4.53711	-2.79788	-6.79124	-9.55189	1.5562	6.6734	-17.5587	9.0816	12.7066	5.88297	0.983293	-16.3877
1838.9	15.3286	5.12067	1.45371	17.0783	16.4113	-7.16168	-1.70234	7.87388	-1.20577	-4.51833	-7.83884	-1.57926	3.16545	-0.204311	-2.6792	-2.16827	-5.80814
1840.46	68.6612	22.4259	-6.80241	19.981	11.1827	-21.3864	8.95558	14.7542	3.38411	-14.8609	-0.492404	-9.05013	-2.12365	3.24957	-8.6926	4.10569	6.96197
1842.02	20.5652	13.5394	-0.907935	11.686	7.68372	-11.5474	-4.19382	1.10865	11.0919	-12.6104	5.25494	-0.263865	-1.14072	-4.24059	4.22531	-0.426028	1.32642
1843.58	18.9688	-9.08117	13.1483	-5.29307	20.6537	-7.41147	-11.5495	4.41054	-0.749459	-16.2846	13.0943	0.0972804	-9.58747	-8.92849	4.99071	0.626006	7.12216
1845.14	-27.8944	-23.8647	9.37175	-12.7207	27.6771	1.44481	-20.1181	-4.13393	-8.31066	-10.0514	7.77738	10.6977	-11.1153	4.79231	-7.76301	0.795375	1.00101
1846.71	-33.1889	-15.9523	-2.74999	-12.2523	5.65075	8.96446	-0.617537	-4.8088	3.10176	3.9857	-1.04124	13.2051	-4.73368	0.843406	-2.03805	2.66353	-1.90298
1848.27	6.96122	-3.60455	-3.45963	-6.15824	-9.95262	8.35362	2.44786	1.4582	-4.63669	4.13216	0.492279	11.9708	0.816081	1.70003	-0.0890814	3.04782	0.610472
1849.83	-5.65905	-10.617	1.16632	26.4562	-10.7417	21.3603	-14.1349	8.20094	-14.7113	3.55519	12.3443	-1.49357	-2.85373	-6.20119	1.97593	-13.945	-4.96361
1851.38	-25.0629	-6.19312	9.12722	9.52008	3.45042	9.04645	-10.6836	11.6563	-11.4413	-8.16037	12.0136	0.974941	4.15388	-8.92903	-3.32023	-3.31147	4.6992
1852.95	-34.8167	2.17705	9.10957	6.99179	8.78381	5.84064	-2.05935	3.88204	-0.418894	0.0301261	7.14115	-3.59535	9.31049	-2.66659	-1.74958	3.16689	-2.59919
1854.51	-31.9076	-6.63474	14.9621	7.78577	8.5761	3.51219	-10.783	0.994121	-4.9283	-4.04978	3.95394	3.47494	8.56569	4.44205	0.133108	8.12911	-6.84145
1856.06	-8.2919	-22.5276	13.1086	2.93843	6.94951	4.96143	-9.18343	10.2008	-15.4684	-9.46217	-7.71386	10.7299	5.01971	-1.51506	-1.66531	11.135	4.8371
1857.62	-28.8424	-22.968	8.36374	-7.7478	-6.2281	8.2399	-12.8623	-0.381891	-2.17203	-10.4071	-2.48778	10.8351	11.4742	5.44401	3.71216	16.349	4.5217
1859.18	5.52991	-2.35822	-8.20822	-8.91822	-6.80379	-2.58689	8.23187	-0.989523	4.93651	-8.34985	1.66607	3.79873	11.8563	-2.36113	1.73685	13.4537	13.8069
1860.74	-17.2884	-6.11512	-6.49919	10.3017	-9.17469	11.5548	-4.97783	-6.23923	0.544365	-5.45723	14.1767	-7.60825	10.0077	-8.84781	1.68333	-1.30445	0.204614
1862.3	-21.5373	-10.0954	3.23583	20.5337	0.167045	17.7822	-6.61218	-7.52026	-2.68946	-1.31704	12.1928	-12.4407	1.73731	-15.783	-2.29532	-22.9877	-4.67777
1863.86	50.7721	19.1844	1.63141	7.67547	18.8676	-13.9085	14.0137	-6.21203	8.62465	0.916132	-1.95561	-18.9008	-4.76889	-12.0684	-8.56518	-0.318791	5.27486
1865.41	17.2143	16.1171	1.21161	7.8495	11.7374	-6.92109	10.5976	1.19953	12.742	4.68341	-3.39592	-8.04004	-4.47162	-5.64035	-7.39452	-2.53947	-1.73624
1866.97	-1.75671	11.597	-2.38659	10.6131	-11.032	0.875024	5.60823	0.150053	0.991633	4.60865	6.30056	0.77029	6.13039	6.30572	-10.4549	-0.75183	-2.81816
1868.53	-35.2609	-12.0929	-4.55071	11.6622	-8.91237	12.6549	-6.74808	9.01273	-7.55888	4.32078	0.286411	8.93844	6.78058	4.39467	-2.35991	4.11713	6.08595
1870.08	-46.0893	-12.8214	-3.73918	2.69108	-9.99031	17.8668	-11.1447	-0.282122	0.0959016	3.66369	8.33927	5.51992	5.32161	4.42754	7.23519	3.34633	2.12681
1871.64	-35.217	-10.4893	-0.55458	-2.35269	-1.60543	12.9836	-6.39349	4.89977	0.551935	-2.87976	4.15511	6.35148	6.77125	-6.31383	4.39271	0.862871	4.84952
1873.19	-46.7025	-14.0275	-1.95731	-3.05041	4.64598	11.5606	-12.6961	2.15006	-0.296747	0.746073	5.99233	4.52516	-0.678902	-6.91973	0.537569	0.620596	-0.281128
1874.75	-17.1369	-10.8411	-1.39793	-6.15991	15.4902	2.49618	-4.69425	-3.61635	-5.70222	8.60865	2.62244	15.8431	1.58622	-8.38332	-11.0858	5.65382	-2.7786
1876.3	52.8666	5.28434	5.91166	-2.97936	15.2438	-9.28932	3.59592	2.99987	-4.9945	6.31533	2.13635	7.48979	-2.88335	-5.52447	-13.9158	13.0481	-4.36462
1877.86	5.66328	-1.14086	3.45365	-3.26826	7.04448	2.74258	-6.62305	3.85066	0.0762686	5.02941	14.4106	1.64787	-3.04478	-3.26221	-7.3586	-7.11897	-7.67606
1879.41	23.8115	-1.79949	-0.0434955	-1.57401	2.12797	1.20203	-0.107313	4.15657	0.378736	11.756	6.72074	-4.28842	-0.0324667	1.48495	-5.28761	0.229457	-7.33666
1880.97	27.8621	-4.02654	2.85326	-0.41837	9.43095	0.488877	-3.60459	8.63256	-3.01424	6.32662	2.22883	-3.31559	-0.0156445	7.2492	3.93956	5.69133	-2.1974
1882.52	8.11004	-0.42612	10.5667	-3.18133	7.01719	4.03587	-1.38366	-4.27329	8.09507	2.77412	6.29105	-0.748653	-1.01263	6.73281	12.0548	-0.966298	-13.6629
1884.07	23.4676	11.4921	8.67894	-14.0019	-6.68139	-7.4667	13.3134	2.43616	18.1711	7.12519	-5.81831	5.56881	3.58693	-4.66682	9.53237	-3.05407	-7.71787
1885.63	15.5725	4.9924	-2.89613	-13.5969	-6.31177	-9.55208	6.08574	6.02341	10.2332	3.38675	3.34273	0.765128	-6.46447	-2.5658	5.65472	-0.97912	-0.954521
1887.18	-4.73858	3.20361	-14.1275	-0.922959	1.02496	-3.47386	1.0573	2.28287	3.18803	0.850418	9.16768	-2.35727	-7.90017	-10.7925	-0.903903	-4.81437	-0.409081
1888.73	-20.3625	-8.08626	-14.137	8.22757	-5.20985	8.73337	-8.85137	4.68934	-1.28622	-3.01224	9.58139	-7.54403	-8.80679	-11.8753	-3.58359	-11.7811	-1.14039
1890.28	-25.0127	-3.2169	-16.4722	7.24799	4.55989	7.53251	-6.79203	-1.2947	-1.23335	1.88253	3.99882	-9.06905	-11.5004	-14.955	-6.8871	-19.4075	-4.61292
1891.84	13.8501	-0.373027	-18.1082	8.62187	-1.53021	6.91148	3.47	6.544	-4.57915	-0.440588	-6.25966	-13.1599	-13.3061	-14.4687	1.01763	-10.346	2.57242
1893.39	24.5505	0.62749	-4.57333	5.84783	-7.72257	6.16857	3.95468	3.71574	-5.27491	3.01859	-5.24714	-1.93122	-5.78775	-11.123	6.03016	-3.10936	-0.568447
1894.94	17.4446	8.05545	3.06487	-13.0372	-10.289	-3.88351	5.73135	0.189113	-0.972342	-0.818744	-2.73362	8.73759	-6.00043	-3.4374	8.56414	-1.5561	-0.215246
1896.49	-18.6067	5.75787	6.86581	-9.17501	-4.04401	-0.0362684	6.03999	-0.0939036	-2.55322	1.1984	-9.21053	12.7173	3.59851	-3.14229	9.57824	5.57275	4.31341
1898.04	-28.0076	-4.04587	5.01849	-16.6226	0.704793	-7.44338	-1.14838	4.43336	-9.12658	1.52806	-3.50046	15.4519	6.29345	0.211523	7.29704	8.52894	6.61757
1899.59	-40.5519	1.11774	-2.44552	-4.53054	13.9048	-9.88767	3.87916	3.21268	-4.67461	5.69391	-5.48502	9.69518	11.2658	-3.56155	5.18399	11.3723	2.44059
1901.14	-59.2186	-7.23379	-5.47298	-4.18977	10.3441	-3.96801	2.4678	2.68941	-8.6327	11.2712	-2.68532	7.46756	14.2806	-4.06925	2.39478	9.41548	-1.67007
1902.69	-67.5288	-6.50731	-12.4267	-0.398802	7.78868	1.18957	4.7574	-5.59821	-4.32961	13.6099	-4.09065	2.62781	11.6228	-2.07572	-0.567637	5.57141	-6.79558
1904.24	-38.9033	0.193093	-17.7147	6.9304	-9.86869	7.11316	6.18655	-8.06701	-5.64395	9.32954	2.4617	-5.56176	9.34706	-0.380976	-2.48564	-0.240135	-4.50261
1905.79	-4.48032	2.04478	-6.63997	1.37682	-12.7126	4.21723	9.09292	-8.0976	0.143952	11.283	-0.73057	-2.37218	0.283268	-0.812865	1.32039	1.85633	-8.0491
1907.34	31.5766	7.82697	4.31323	-17.0619	-3.35063	-6.53303	10.5395	1.36658	5.02207	-1.57972	0.176437	2.33827	-12.1299	1.94212	-4.20568	-0.504325	-2.45973
1908.88	-7.13869	0.549341	13.2605	-1.99438	12.1668	-0.15704	0.159425	0.73341	-3.08868	-3.32399	-3.44997	10.104	-1.19723	2.12437	-7.87334	1.62785	-3.90181
1910.43	-5.10256	-4.28058	20.4438	-0.151008	16.6456	0.15694	-2.0491	3.26526	-6.11053	-5.28697	-0.462527	5.75308	1.13137	5.65109	-1.4128	0.763637	-2.98893
1911.98	14.3505	4.59676	9.6046	6.22639	6.94085	-1.49659	3.3009	3.95395	-4.02852	6.3423	-5.20438	0.538593	0.222485	-1.13398	1.25099	-0.250075	-4.6918
1913.53	19.5451	1.59039	1.36627	10.2956	-4.62984	3.73545	4.19633	3.14155	-6.49381	12.6657	-2.25628	-8.71619	-3.53388	-3.07257	10.345	-6.52663	-7.12919
1915.07	-3.4836	-11.377	1.45607	13.7075	-5.86313	6.58297	-0.0269986	3.73787	-5.07976	11.4055	-2.64028	-4.45452	-0.342411	-2.11463	8.85777	-4.98113	-7.20805
1916.62	-14.0397	-11.5455	3.75919	10.0917	-6.98675	11.2013	-5.93452	-1.65005	-8.59625	1.59955	8.40288	-2.87435	2.6211	-1.41741	2.74281	-8.65405	-9.25906
1918.17	-4.28968	-8.45918	3.8728	-2.90898	-9.9596	3.51238	3.41191	-3.09771	-2.758	7.94091	-1.19112	2.64878	7.64968	-6.60707	5.29925	2.10308	-8.07657
1919.71	-12.6562	-11.1159	9.63652	-4.40512	2.18991	-1.37068	-0.0938955	-0.854577	-0.0061481	0.999333	5.1415	4.34011	12.3299	-2.52117	-0.253903	10.5859	-8.23143
1921.26	-44.0462	-15.3713	7.58456	4.20659	13.4824	-1.98737	-6.38699	3.75413	-4.12007	-6.69372	3.45101	3.02044	16.8998	-2.21727	-1.42609	11.8161	-3.53692
1922.8	-27.3469	-11.2017	1.99835	0.452579	7.26665	-2.12703	-5.37788	-0.112554	-1.58067	-5.14738	6.87389	-5.50362	12.6996	1.09693	-1.54824	7.03429	0.42326
1924.35	8.26419	-3.90897	-5.62578	-3.33055	-7.44452	-5.74025	-7.26553	4.5186	-0.804252	-1.52515	6.68102	-12.508	3.56941	-1.07945	-2.23596	-0.875595	9.42242
1925.89	65.3473	2.88535	-13.6494	0.111975	-25.6101	-9.68142	-2.34997	7.04602	-4.07666	4.96546	1.58918	-13.9111	-7.56882	3.79468	-6.08154	-10.7959	11.3977
1927.44	32.6146	-2.08215	-4.6889	-2.59703	-16.9987	-4.65866	1.11078	9.24649	-6.45323	3.65842	-4.41273	4.49809	-1.4686	5.82228	-9.41014	-5.48844	14.2399
1928.98	5.07052	4.35289	1.47367	1.66352	1.0208	-0.511792	2.46128	-4.49884	-3.76755	-0.839516	3.36323	3.46105	0.902152	11.9617	-9.84742	-1.93695	6.6493
1930.53	-43.7395	-7.86587	1.56882	2.51077	8.13187	3.68625	0.899603	-6.45614	-5.00728	2.72694	1.18683	4.99893	9.49978	9.17629	-5.37203	5.85569	0.0583585
1932.07	-63.7422	-8.35907	3.04326	1.8243	17.7315	0.0776836	-0.334681	-5.3833	-2.43527	0.664017	1.21658	5.14807	10.1475	5.29241	-3.04059	9.08222	-2.93237
1933.62	-88.1673	-17.2579	4.44203	-2.58701	20.7312	0.321808	-5.64086	-4.93795	-1.94593	0.114431	-1.88016	9.48524	10.3382	-2.09064	-1.08258	9.22724	-5.85187
1935.16	-94.0672	-20.164	5.46041	-5.5813	28.721	3.60932	-7.82508	-3.07915	2.97999	-6.49127	-1.31609	10.496	3.89525	-4.86952	0.357463	3.34606	-8.3778
1936.7	-45.703	-14.4977	12.6093	-6.22719	25.228	-0.320621	-10.7375	2.07312	2.81906	-11.8342	1.74382	6.64373	0.333841	-4.95511	0.398816	4.41545	-3.34989
1938.24	1.60679	-3.37321	7.51899	-7.15598	18.3083	-9.41906	-4.95392	10.4179	-1.3405	-9.1667	-6.82339	7.75684	-8.00306	-7.31368	-7.89326	-0.724346	1.07123
1939.79	21.8776	11.499	3.66148	-6.96666	9.81432	-7.72272	4.05944	1.67284	4.92691	-5.73196	-2.61317	0.741496	-5.39371	-6.27843	-8.73559	-3.12697	6.15872
1941.33	0.397387	12.6599	3.33008	2.36515	12.311	-1.75033	3.93014	-7.71676	7.44647	-1.69416	4.29368	-2.70121	-2.42077	1.94813	-9.50528	1.69252	2.62456
1942.87	-3.62069	5.25115	5.94863	-0.754182	4.67774	-0.526844	0.478758	-4.06187	2.80763	-3.45532	9.95979	-2.97602	2.63026	2.54928	-3.45637	6.39915	3.03866
1944.41	1.85563	7.65118	9.20385	0.326932	1.70919	-3.70052	0.893877	-2.30175	1.58276	-1.78579	8.50396	-2.71826	4.8332	2.87937	0.64948	9.95652	3.62346
1945.95	8.04078	1.37016	15.3456	0.169876	-0.465522	-1.99143	-5.36423	-3.71856	2.24646	0.93831	5.15822	-0.523134	0.271513	0.861067	2.28442	6.18526	-3.84559
1947.49	34.6864	8.90213	11.5209	-9.26398	-3.72994	-11.6246	2.40399	3.97982	5.29626	-4.43243	4.06563	0.293819	-3.04965	2.81661	3.64825	3.34401	-5.1489
1949.03	54.5585	8.76833	8.06141	-6.38076	1.40468	-9.11523	1.33066	6.2885	9.48919	-4.08935	1.81551	-6.59274	-11.4269	-3.45437	4.04121	-2.079	-2.68339
1950.57	63.2615	13.0656	1.80962	-1.80738	5.70383	-16.2493	1.22947	12.6459	7.17267	-5.45958	-7.76021	-7.34397	-9.35004	-10.166	3.92587	-0.116278	4.35891
1952.11	85.1006	24.0105	-8.46046	-1.54495	4.07646	-21.2202	11.7957	7.27667	12.4423	0.686493	-13.7015	-12.2553	-7.99118	-11.5424	3.61397	3.77683	7.61292
1953.65	46.4513	13.1376	-6.62073	6.09545	5.15985	-4.01626	6.58233	-1.72379	12.5755	3.28032	-7.14072	-13.4405	-8.71557	-4.44424	1.33316	-5.50051	-1.36478
1955.19	48.036	16.0735	-3.64353	4.55124	1.49521	-4.79105	6.67905	-5.66973	8.14349	-8.38662	-3.70104	-11.1421	-1.46059	-0.336307	4.5338	-5.7581	3.60804
1956.73	24.3713	12.112	-1.25426	2.08922	6.05179	-9.07418	6.01816	-8.04553	0.591256	-7.75369	6.35513	-6.59323	3.4748	7.01182	-2.55234	-2.94666	4.27752
1958.26	-17.5636	0.797227	5.73466	8.034	12.7373	0.444137	1.9199	-10.6098	-2.95431	-6.17089	8.34993	-0.439296	3.34045	9.05167	-5.97196	-7.19958	-3.23412
1959.8	-17.4915	-0.656983	13.7597	3.04183	11.2584	-3.56686	6.91564	-3.80704	-5.23659	-3.71763	7.31006	2.95934	11.4489	14.2629	-4.45563	3.15564	-6.36169
1961.34	-41.9865	-5.95351	5.03871	-4.32671	11.5861	0.916483	4.25958	2.47176	-0.559687	5.77961	0.0051011	5.36821	8.27379	2.10053	-7.2158	-2.82717	-1.92386
1962.88	0.585604	-1.7348	2.49627	4.08781	9.52658	-7.67067	1.08838	10.8945	-0.497093	7.52439	-9.37275	-0.491076	3.27353	-2.40877	-4.16313	3.97861	3.06677
1964.41	-6.55603	-0.288548	-2.38821	2.98903	12.7715	-7.26581	2.98193	16.41	-0.750997	2.78396	-13.3512	2.3755	4.6024	-1.05789	-0.784615	12.3277	5.73326
1965.95	-11.0443	-2.25709	-1.75808	1.22847	3.57339	5.66213	-0.31488	7.32171	-0.66384	-0.890753	-4.07333	0.90346	-1.54554	0.095474	0.551417	0.994054	-0.232766
1967.49	4.40972	3.56119	-10.1373	-2.80395	-9.23917	7.46232	3.22462	-2.96119	-1.00658	-1.76754	-6.90679	5.3794	-2.07993	2.23835	6.32203	-5.81535	0.0820622
1969.02	7.55672	4.04335	-14.6572	-3.59921	-5.571	-0.882112	3.90744	-3.77152	1.97435	-4.49625	0.949957	2.86676	-4.97502	3.16962	9.01008	0.517028	7.90678
1970.56	1.60805	2.73825	-3.90566	-0.626631	-3.00003	0.827371	2.11749	-5.77749	2.43671	-6.60841	5.48241	7.5088	-2.71159	6.26698	6.98377	-0.352948	2.15668
1972.09	12.3006	7.41191	7.28618	1.96583	6.99974	-6.20387	7.87629	-4.2609	4.69917	-3.12804	0.407765	5.63036	-0.207755	3.57242	4.52906	-2.34554	4.66935
1973.63	15.1546	8.77804	-1.47513	-4.34848	-5.23552	-6.31014	11.0009	-4.95795	6.70542	6.95139	-4.69427	4.65971	0.612995	-0.524044	3.61604	-7.28555	5.27915
1975.16	13.1459	0.39301	-2.98443	1.43185	-6.93987	-5.44516	1.36517	-4.03245	2.24923	6.20294	-3.44924	-1.87404	0.806383	-6.36641	9.14652	-3.5607	8.84398
1976.7	-1.58199	7.34613	2.80966	-2.32074	-4.5906	3.25277	4.70952	-10.7295	6.0295	1.93601	2.33146	1.48874	-1.85906	-2.42736	1.42962	-6.34568	1.44035
1978.23	14.3401	10.3599	4.87007	-12.0211	-3.35193	-1.36321	8.60986	-6.55044	5.67539	0.940472	0.0392909	2.45664	-5.89725	-3.11747	-0.990621	-4.92229	0.321502
1979.77	-4.28716	2.89636	1.80504	-2.52071	0.283384	1.77054	6.88967	-8.57127	5.28405	6.20429	-1.27924	3.41562	-4.57974	-1.47131	-3.21506	-6.09829	-6.73835
1981.3	17.9274	4.72521	7.24747	-3.29686	2.60242	-6.20926	4.02317	-4.84591	7.16955	5.70897	-1.15803	-2.3723	-4.14877	0.16623	0.740205	5.15434	-0.729209
1982.83	7.23886	2.97487	9.53292	2.45874	10.3469	-4.1505	-3.02811	-3.97971	4.60881	-1.26797	1.7767	-0.326756	-1.79576	2.13102	-2.62471	7.88548	-0.138741
1984.37	-10.2198	2.41227	6.47945	11.1035	17.9068	-2.95817	-3.56208	-3.26907	-0.533945	-4.83771	3.67938	-1.58647	2.51028	3.05262	-4.66701	6.95215	3.09084
1985.9	-21.1857	-3.6648	2.95105	9.49955	16.0624	4.70972	-10.1102	-8.97711	-2.36941	-7.93611	4.27864	1.42204	0.90395	6.50131	-2.33139	-0.304203	1.08054
1987.43	-19.7753	-8.49579	-3.05205	6.82246	10.7044	4.39309	-10.7376	-10.8052	-3.4381	-2.91819	5.79449	-2.42655	0.584342	4.23803	0.362316	-0.22438	5.30929
1988.96	-5.30191	-0.86884	-4.54142	1.05442	-0.7255	3.5704	-7.11713	-10.4242	-0.646277	-2.15845	6.26305	-2.00365	-1.49068	2.26681	0.662088	-7.41637	2.13828
1990.5	-9.06056	0.5765	-8.72559	2.0893	-9.3693	4.23132	-6.05286	-6.38733	1.0639	-1.83924	-0.475437	1.53702	0.130656	0.499826	3.83884	-9.64192	1.51711
1992.03	-14.8978	-6.72093	-7.59121	-5.62585	-5.12565	-0.352063	-8.93086	1.47694	2.90224	-0.63506	2.68215	-2.25397	-9.32092	-1.99855	3.89142	-12.2294	2.03403
1993.56	5.65214	-0.803418	-5.48737	-12.9336	-8.0707	-3.25648	-2.39018	-0.649147	5.40851	5.37435	-2.1971	-3.46733	-10.8621	-1.06804	1.11958	-8.6495	8.87337
1995.09	10.1507	6.60884	-15.3357	-5.76703	-15.953	-6.37819	1.14031	0.536011	4.38242	6.61678	-4.42446	-3.12218	-4.56837	-2.48002	1.6085	2.07027	14.0592
1996.62	-4.69589	3.53893	-10.055	4.00888	-15.7831	2.37901	0.239036	-0.621587	-4.49607	4.17043	-3.35465	-0.985491	3.32197	4.03881	3.30552	4.53554	7.60774
1998.15	16.3285	4.9803	-3.81413	2.86846	-10.7372	0.709592	0.0508908	-0.212005	-5.31217	0.507324	-4.49175	2.24716	2.86964	6.39717	2.08591	4.44084	5.11422
1999.68	35.05	5.6455	-4.06851	2.90536	-10.2717	-0.602323	5.65672	-2.40636	-3.66829	1.18726	-5.91902	-0.0428374	2.7954	6.19762	3.52766	7.46451	1.68716
2001.21	26.2676	9.00409	-9.04146	7.3413	-17.4462	4.97653	2.20174	0.566865	-8.28798	-5.2848	-6.34586	1.37506	5.68297	-0.743291	6.32383	2.38339	2.87008

## Sheet: DataS4
Dataset S4 - LDA loadings for the chemospace shown in Fig. 2b. LD1 and LD2 loadings are represented as line plots in Fig. S7.
wavenumber	LD1	LD2	LD3	LD4	LD5	LD6	LD7	LD8	LD9	LD10	LD11
900.314	-3.61116	-2.09057	-11.7125	-4.23387	-9.26827	2.8655	5.51011	2.61067	2.02203	-2.40248	9.05602
902.072	-3.88335	1.78864	-5.03192	8.26912	-4.64322	8.06274	-4.46298	6.14686	-2.77346	5.65192	-4.28653
903.832	0.699134	3.04353	4.67858	6.68264	-4.95697	3.22983	-4.79856	0.00378427	2.07422	-7.09643	2.74808
905.59	5.84343	1.76933	0.729003	10.1868	-0.297789	-1.44639	-3.69401	6.51939	0.818665	-3.41353	0.0857617
907.35	0.86684	7.46038	-10.2587	-2.22541	5.0387	-3.96165	0.432738	0.19756	-3.21438	-15.9424	19.3966
909.107	-3.11174	14.9358	-3.63532	-2.1507	-2.27347	-8.04386	-11.6772	-0.511008	-0.621714	-10.8893	21.3923
910.863	-0.0352074	14.5738	-1.02122	-2.54014	5.50596	-2.58198	-17.6613	3.20152	-0.981482	-3.486	10.7775
912.621	0.955489	15.7235	5.11736	-1.40893	0.74664	-8.88514	-17.4956	-1.7616	1.9385	1.71061	3.62552
914.377	-5.23151	16.3547	5.0687	-5.74412	-11.1524	-2.80414	-9.37685	-14.6529	1.9035	8.55885	-4.82744
916.135	-8.37565	11.4855	4.37205	-3.13473	-13.2531	-6.25172	-6.52903	-11.8936	-1.98593	5.58301	-4.77849
917.891	-2.11446	7.06387	11.1529	8.61827	-21.2651	-0.319981	1.89417	-14.6168	-2.13015	-1.1655	3.78365
919.645	11.5699	-3.71356	2.67328	15.0586	-9.44622	6.88137	4.20966	0.663815	-4.40086	-2.95154	8.16363
921.4	12.4133	5.40547	1.8804	8.23086	-4.14525	2.10486	11.7788	3.60398	-1.28176	-16.8658	24.4355
923.156	8.06164	-3.55843	3.34973	6.98493	-4.62216	-0.590422	10.4093	1.45384	7.96687	-9.22606	21.0305
924.91	2.87298	-9.95277	9.50651	-4.24357	8.35326	-2.06952	10.1132	6.88308	21.062	-18.7206	18.5063
926.664	-9.01162	-8.25595	13.2307	-3.61653	4.65237	-6.62999	9.47145	-0.503614	11.5143	-23.5474	18.5846
928.418	-5.84692	-1.54216	5.86007	-6.47944	-5.52992	-4.20873	11.3197	-10.4485	3.37726	-7.71179	6.17395
930.17	-9.82735	-17.8797	-6.15957	-5.45583	5.20479	-8.11347	5.24551	-7.62817	-9.67543	2.58343	-7.71755
931.924	-6.27041	-11.7335	-6.93972	-4.55679	0.187266	4.56514	-7.9348	-10.3477	-20.2905	2.03799	-8.43594
933.676	4.43033	-19.5302	-14.5989	-4.0701	16.5124	7.17417	-15.6322	5.59498	-28.1527	4.66598	-13.2223
935.428	3.39646	-10.9736	-12.9799	-9.72379	14.9859	-4.26535	-22.9741	10.48	-23.8054	1.69794	-9.03767
937.18	-7.76594	-5.97741	-14.38	-7.62634	-4.5424	-10.4169	-24.8769	2.44677	-20.0681	13.6163	-8.14368
938.932	-3.85932	-10.876	2.89678	-11.6966	5.25938	-16.5978	-19.2743	20.6691	3.46204	-4.40218	5.86825
940.684	-9.05174	0.871386	3.03137	-8.76871	-4.76422	-2.73901	-17.7959	4.37457	-6.08737	-9.00042	1.92306
942.434	-6.81097	18.9973	2.82046	-6.83889	-2.78639	-2.11301	-15.2496	1.18956	2.85573	-3.81699	3.14098
944.184	-7.15604	13.2371	-2.55959	-8.9934	7.17154	7.7739	-13.4448	-0.115639	1.6565	17.7788	-6.04228
945.934	6.77502	4.9794	0.300271	-7.09557	3.65815	13.4076	-6.77277	9.25899	-0.919347	13.9585	5.03731
947.684	1.68042	-7.46167	0.720154	-11.4461	0.71795	5.72159	16.7222	15.1695	6.98319	7.3904	14.3868
949.432	2.24677	-11.0428	1.49242	-7.03581	0.406034	6.19508	10.8192	21.5094	1.2601	4.36447	14.6582
951.182	-1.73073	-3.34959	-0.407712	-3.0216	-5.98218	3.81742	4.57012	15.2117	-1.14458	6.80729	5.80495
952.93	3.23014	-11.8255	5.02701	-5.21366	14.9369	1.67583	14.6228	23.7741	1.56286	-3.58254	9.45445
954.678	-4.2375	1.85074	3.06784	-3.86227	3.79973	0.198824	-3.19264	0.660536	-2.59241	0.950653	-13.8027
956.426	-4.55406	11.7111	1.13607	-0.321825	14.3201	3.08923	-10.5199	3.05739	0.633296	7.03158	-24.786
958.172	-0.366279	14.0535	3.27333	6.47169	2.69997	13.0474	-30.1766	-6.7502	-10.1227	17.8397	-39.5428
959.92	3.6333	-3.65961	-7.31305	20.4895	24.9425	15.1484	-12.442	27.5518	-13.5326	23.7754	-20.0899
961.666	-9.18819	0.830625	-11.9569	9.83634	13.0435	13.3574	5.96499	25.8249	-2.84272	9.71877	1.63491
963.412	3.5154	-6.05692	-1.12745	16.8854	7.98458	11.5833	0.121137	24.8384	-9.3098	1.05476	0.773518
965.158	-4.65497	5.5583	-3.3147	8.93117	-2.45301	10.3022	-1.39286	7.2935	-4.37402	-0.705583	2.04971
966.902	-7.06523	12.4169	-0.180276	10.1631	-2.5258	8.85111	8.31441	9.65699	-1.61239	-0.654943	11.7332
968.648	-4.12217	19.4057	9.9819	13.2037	-19.2065	6.94084	-14.8007	-2.66229	-0.103992	2.29636	-8.54082
970.393	-6.66162	24.0509	14.5372	12.3418	-3.45689	9.20881	-16.2137	3.32942	5.49555	1.0028	-10.8722
972.137	1.14017	25.6081	9.06122	3.82755	-8.93078	9.16329	-35.7712	-1.65291	-1.37027	7.52642	-16.4739
973.881	1.41687	18.9787	-2.75105	-3.88061	2.57511	17.776	-23.7418	9.06243	2.79493	13.5639	1.08624
975.625	5.36318	9.82169	-0.766984	-12.0482	16.0351	11.4488	-9.4837	13.2058	7.84274	3.81819	14.2375
977.367	10.9304	-4.38204	8.68873	-16.6297	7.90174	-3.96148	-13.5419	12.9617	8.28902	-3.36859	3.56307
979.111	5.06437	-2.82161	-3.87964	-15.9055	5.42241	-4.09948	4.60153	14.4038	5.08429	-2.50282	7.05191
980.854	3.87015	0.171487	-0.619814	-5.91323	3.62962	-10.6573	23.436	8.01341	14.5302	1.09444	7.81923
982.596	0.199802	-1.25845	4.05271	8.22161	2.48662	-6.48737	18.7161	-1.29681	4.27684	-1.0769	-6.11476
984.336	-12.5062	-0.54355	11.3731	14.0524	9.17528	-12.7	27.526	-6.09106	6.91209	0.10547	-1.26525
986.078	-10.1544	-1.84986	10.7168	2.61942	-6.12496	-11.8392	14.2259	-12.2499	-2.21051	-0.212016	-3.65879
987.818	-8.53549	9.67397	8.76893	-2.4789	-23.1111	-0.273705	6.61349	-24.2175	-8.39529	-14.3132	0.957641
989.561	0.104702	2.29816	9.95766	-5.88685	-13.9258	6.57698	7.12096	-18.1786	-4.96908	-6.30889	2.64463
991.299	2.65224	-4.68638	1.6412	-18.6074	-16.7711	2.42851	8.52837	-14.596	-0.403207	-14.3676	-1.09741
993.039	10.6512	-7.91592	-7.66969	-8.39324	7.24443	6.23433	14.17	3.01559	-1.28787	-7.22479	-3.71323
994.779	12.2388	-2.37939	-3.95271	-3.60421	7.31522	5.86621	14.7052	-0.154367	9.91403	-2.7886	-12.4791
996.518	12.2379	-1.54612	0.0571805	10.749	11.801	13.1721	6.82667	10.0256	5.36461	2.93041	-18.4277
998.258	8.1634	-6.81903	4.30348	18.142	21.4688	12.8886	14.6759	15.9158	9.13657	6.61507	-7.32068
999.996	6.21031	-13.8786	7.78687	11.4748	22.5836	4.07577	8.14135	13.2734	8.21448	6.16454	-4.59548
1001.73	1.55329	-1.03028	6.75996	9.89834	13.5969	-2.13957	1.53931	4.01242	7.88521	6.564	-0.823085
1003.47	3.99462	-5.70648	5.51448	11.2574	6.38172	-4.56173	-2.0888	3.59298	10.6878	3.95834	2.49385
1005.21	-4.62185	-7.8689	-8.58383	5.51674	10.5108	-4.36156	6.01335	1.98282	8.21545	-0.465768	4.39623
1006.95	-6.57051	-5.44025	-12.7742	4.31889	13.3534	-3.77704	-2.42674	-1.15973	2.88978	3.52642	0.532872
1008.68	-8.92594	-1.80763	-7.87167	-1.83355	-5.02447	-2.9004	-0.909407	-9.46667	7.123	2.63822	-3.05654
1010.42	-7.89427	-1.44232	-10.1602	-8.19932	-12.8214	2.23711	-3.23197	-19.0382	2.35569	11.3388	-8.35555
1012.15	-5.67453	-3.22621	-11.184	-9.6681	-10.6481	9.58686	-5.65843	-19.7274	-6.26696	9.75045	-15.2291
1013.89	-6.66373	-11.809	-6.19987	-6.50047	-12.816	4.52881	-2.59992	-16.8333	-11.9661	4.8177	-20.4982
1015.62	-4.90689	-8.74049	-0.980167	-4.54245	-10.6793	-3.14333	-6.71593	-6.13218	-7.4903	4.50285	-18.6063
1017.36	-5.5644	-8.56878	4.02413	3.87921	-8.67168	-13.129	-15.5051	-0.444813	1.38145	-3.57876	-12.1967
1019.09	-5.83922	3.66711	-1.18276	9.04934	-0.985794	-9.48598	-2.30329	3.47263	5.69725	5.43201	-4.55209
1020.83	-3.25793	5.19643	-4.3701	-0.867742	7.22705	-11.8162	9.90804	3.25569	10.302	0.0105746	12.0264
1022.56	2.30716	0.517878	-1.07236	-10.3869	5.35285	-20.6061	27.7996	4.89663	25.6404	-8.32943	24.382
1024.29	-2.40061	12.5759	-9.73438	-12.4635	-6.41505	-8.65371	16.8435	-15.7487	8.17496	-4.1561	11.0502
1026.03	2.98576	19.8221	-0.158592	-10.6372	-8.54671	-3.50866	-10.3666	-19.933	-0.929896	-7.27425	-3.62234
1027.76	2.33889	12.5967	9.2173	-12.0776	-15.3314	-2.99959	-7.52637	-20.8849	-1.09171	-10.4112	0.675196
1029.49	4.49687	9.56954	17.1699	-4.8646	-16.6004	5.06569	-20.7169	-14.2163	5.80985	3.83126	-15.9025
1031.22	-10.82	0.654829	7.68801	-0.260109	-12.4571	7.34204	-9.18899	-16.1366	1.36493	2.51583	-11.3092
1032.95	-0.205171	6.48718	-2.08702	6.60118	1.7171	9.86828	2.04452	4.17544	2.64623	12.1463	-0.869274
1034.68	-3.46544	4.19102	-12.559	0.119059	17.8061	-0.030844	13.6467	10.1392	5.06735	0.144129	13.7232
1036.41	-1.7969	0.915068	-14.0392	-3.01364	11.2019	-7.65981	16.8614	10.6726	4.03752	5.31173	8.74241
1038.14	-1.32602	4.5363	-12.1435	6.65915	7.64915	-5.03864	8.50153	10.512	-7.17153	10.6139	4.13287
1039.88	7.83427	-2.75141	-1.96079	9.04487	15.9982	-17.7118	2.94149	19.5749	-0.283966	3.39569	5.67227
1041.6	6.55541	-6.70481	-0.328329	1.17337	8.85095	-20.3829	6.84182	5.25504	1.04572	-5.55651	6.92791
1043.33	1.14487	-4.01069	4.51056	2.98293	3.97785	-24.1893	2.52396	-11.8391	2.15145	-5.70818	-5.83304
1045.06	-10.2591	-5.69076	-2.4586	0.226149	-1.78399	-18.3279	15.274	-15.5887	-0.974153	-7.93091	-3.09063
1046.79	-7.67969	0.315544	-3.21336	0.910585	-4.50884	-7.44296	7.88332	-9.33711	1.65182	-11.8448	3.90561
1048.52	-3.1787	0.267	-4.12395	-1.11112	-2.98406	-9.77527	6.11093	-8.90296	7.42834	-19.1434	9.61561
1050.25	2.9119	-1.01454	-5.675	-3.59533	-7.00459	-2.28129	1.69516	-5.87035	0.552598	-0.661484	-3.33392
1051.97	21.4097	-4.22619	1.65208	1.60981	2.48997	-2.29414	5.68343	11.4259	7.66517	9.36705	2.42434
1053.7	26.1508	5.74492	6.3496	3.95083	-5.78147	-3.54646	1.01931	10.9418	7.05625	8.26898	8.28887
1055.43	15.1331	9.39164	1.75019	-6.66133	-5.86133	-2.9128	-0.0653079	0.337742	0.264114	-0.0981313	8.68596
1057.15	6.88378	10.7123	3.2965	-9.26383	-6.09224	-13.4831	4.47473	-4.87007	6.97959	0.172705	6.32952
1058.88	2.11028	10.3878	1.29094	7.61302	-5.70954	-1.22933	11.6007	-0.2437	-1.49408	2.59026	3.27882
1060.6	-12.3384	1.90986	-0.512029	4.78012	1.20659	1.94428	2.45453	-0.442894	-3.59545	-7.85576	4.57253
1062.33	-6.08591	-7.49907	-1.01284	5.38358	10.2978	-2.9976	-5.99962	7.13377	-6.13461	-1.45371	5.40986
1064.05	-12.2559	-5.37102	-3.07512	-1.66981	18.2758	-4.93867	-12.7556	0.31969	-14.1138	-3.93402	-3.93102
1065.78	-1.87393	1.38262	-3.52636	0.558934	7.09115	-4.60326	-13.23	0.371979	-15.2824	1.01525	-10.0447
1067.5	-9.56624	15.2202	3.48611	-0.0153478	-5.62704	-3.63449	-0.387322	-5.03026	0.73013	11.2232	0.386668
1069.22	-8.09449	12.9922	4.91342	-9.51909	-11.3324	-5.78114	-8.97504	-13.6087	0.0571552	7.77669	-5.50878
1070.95	-5.31733	10.2133	5.2059	-8.95363	-18.193	-16.6893	-10.2249	-25.0548	14.4176	0.645983	-1.10296
1072.67	4.72779	9.6652	-6.6824	-1.56313	-9.3352	-8.2117	-6.49252	-19.3632	-0.815397	-2.05635	7.11063
1074.39	1.79641	2.79233	-6.01424	-8.11357	1.02051	-6.05431	-3.16642	-12.447	4.73156	-5.04382	17.8571
1076.12	4.82965	-5.95088	-8.09125	1.87964	14.8309	0.453725	5.52365	0.273477	-8.49377	-0.085047	14.1666
1077.84	2.16786	-6.26832	-2.42802	-8.11436	16.0144	7.35396	13.5212	-0.0426172	-7.79434	-15.2133	14.5836
1079.56	3.08227	-8.92657	2.41297	4.71363	9.06221	13.9279	4.82698	13.1191	-13.6481	-6.4736	-7.01266
1081.28	-11.4607	-10.4054	3.30551	8.5842	10.0925	19.7351	15.7193	13.468	-14.0592	2.17275	-9.08442
1083	-8.46226	-9.04383	7.96601	11.8562	-0.0517096	14.5044	-10.0823	3.67979	-17.9443	-3.46784	-15.1636
1084.72	-14.9414	-8.18008	6.61463	11.6894	-3.67592	5.81563	-17.5746	-10.3862	-13.8528	-9.31159	-12.3796
1086.44	-5.91182	-6.96967	-1.82491	2.40622	15.1578	-2.48608	-12.0794	3.41543	-4.74952	-14.5162	5.03511
1088.16	2.08951	-11.6768	0.497344	2.92542	17.7564	0.842834	-0.823256	9.95678	5.02965	-2.90486	11.1736
1089.88	5.2033	-8.9625	-1.24146	5.19961	6.24918	3.06306	7.16177	-3.78481	-0.925321	-5.2541	4.10867
1091.6	8.10555	-0.188059	3.1975	-10.3933	-6.3282	10.6005	1.9603	-9.45534	4.43658	-3.09873	2.42187
1093.32	16.9874	-8.81874	7.2875	-0.3571	-2.58793	23.5859	-7.01231	3.80355	-1.75788	2.32042	-5.49323
1095.03	12.2021	-10.276	0.373887	-3.85381	-11.6526	16.8484	-2.30098	-1.94257	-12.7403	-3.24117	-0.402222
1096.75	12.6396	-2.30457	1.38563	-1.69929	-10.5847	7.79702	-8.88686	0.288383	-8.62589	-8.61981	9.45746
1098.47	9.78527	-9.465	2.62726	4.59748	-4.05821	2.61957	-9.3137	7.80389	-3.43619	-2.34393	0.729432
1100.19	8.68527	-2.15168	-1.1517	1.50991	-0.0915837	-8.55536	-5.17142	7.97114	0.787146	-6.90625	7.50696
1101.9	2.80526	-6.56787	-0.194797	6.11985	2.74784	-2.39609	-2.42406	9.30383	3.29437	5.41353	0.705667
1103.62	-2.70011	-6.43759	-3.21787	-1.38129	5.17358	-5.18974	10.7959	3.05909	2.14986	-6.51808	7.23729
1105.33	-3.94961	-9.96734	-12.5063	-10.2558	6.02909	1.42212	13.8089	-1.05058	-1.73967	-3.39365	2.8704
1107.05	-2.3938	-15.0515	-4.24261	-1.86043	11.0564	11.1495	13.8505	3.51148	-1.13849	-4.0046	8.10515
1108.77	-1.19993	-4.93667	-0.523396	2.9264	1.60373	-0.30322	10.9954	-4.00646	2.44791	-3.26783	14.4611
1110.48	-0.682839	-10.048	1.89957	8.95849	8.28371	5.48084	7.8267	7.22489	9.38381	3.4	16.229
1112.2	2.37055	-3.24166	5.0042	9.40575	-3.92313	5.0758	-5.67909	-1.08066	9.51482	18.1604	-3.67006
1113.91	-4.9945	3.94272	3.61569	10.9229	-7.04447	-3.2154	-12.8333	-11.9668	4.18942	19.714	-10.9167
1115.62	-6.18101	6.10671	8.46006	-0.881654	-1.00858	2.33248	-20.2102	-9.87458	4.05206	5.78908	-7.58659
1117.34	-3.67145	-4.71699	6.49117	-3.4276	10.1561	-2.49621	-0.283967	-0.694328	7.94549	1.34283	-3.92869
1119.05	1.52551	-1.43251	0.798527	-8.50555	6.6254	-4.25468	0.885497	-4.37334	1.2274	-1.67329	-2.73407
1120.76	-6.55948	5.37109	14.4742	-0.623783	10.3006	-0.850066	-4.44279	-5.11882	1.24378	-2.97606	4.77086
1122.47	-9.80053	13.0157	9.48755	8.7212	9.23787	-9.51313	3.77456	-6.9314	2.78218	-3.45447	17.3047
1124.19	-9.32006	3.65133	-1.24385	11.7303	13.8996	5.32695	8.30693	5.44188	-8.67115	1.13753	13.3018
1125.9	-8.1252	11.2494	-0.154229	14.4244	-4.3194	1.85935	4.55753	-4.99762	-11.6868	3.795	-1.46541
1127.61	-6.6005	0.383906	0.614352	11.3773	-8.48645	0.123647	-2.33626	-0.677715	-4.95194	2.46842	-8.76817
1129.32	-3.42142	2.43714	-0.505189	2.83479	-9.2448	-3.17557	-3.44711	0.50855	-4.613	-2.70416	-2.53452
1131.03	-0.0810594	-11.9085	-1.32955	0.807996	0.930736	-4.43132	15.0704	3.99323	4.57235	5.53403	-1.32834
1132.74	7.50256	-4.76708	1.78323	-6.0873	3.02294	-1.45879	1.80662	1.8277	3.13096	9.10539	-1.89716
1134.45	4.70397	-3.52046	3.30504	-2.96007	5.96509	-1.61266	-6.73506	-3.16144	0.736625	7.71911	-3.31743
1136.16	6.91349	-0.590269	-0.513146	3.58944	9.78403	-5.84071	-8.07661	-1.22691	-7.53841	1.27462	-2.99156
1137.87	7.92728	4.17295	-1.95793	8.23702	14.8201	-0.507958	-3.19919	5.43725	-9.42079	4.2486	-3.83521
1139.58	2.90879	5.83641	2.59909	-3.90567	7.17357	-5.38232	-0.261763	-4.18339	0.493993	-5.68194	3.61111
1141.28	5.32188	8.69289	4.48252	-4.99529	-0.356986	-7.04267	-0.0260922	-5.07815	4.15258	-5.39175	2.91288
1142.99	-0.863276	17.4469	2.33012	-8.07533	-1.50935	-9.22588	2.21326	-5.34738	-2.60389	-5.174	7.78332
1144.7	0.202436	4.60354	-3.61747	-14.0865	9.11268	-7.21609	11.6012	-3.53498	-1.35743	-5.89678	9.24806
1146.41	0.119292	6.94156	-1.38841	-16.8169	0.409198	-3.63736	-2.96649	-11.0784	0.666844	-2.8925	0.279701
1148.11	-1.07448	6.89316	-4.69448	-10.5935	-1.21188	-8.37142	-14.5117	-11.7389	-3.68739	-0.249346	-0.922761
1149.82	-0.0836808	4.91623	-2.59934	-2.65112	0.0765829	-2.54233	-16.2776	-9.52557	-8.0084	7.6949	-7.00319
1151.53	3.35761	-2.78642	-0.408372	-1.83711	-4.78241	-1.47255	-10.7789	-8.85083	-4.76019	8.77184	-11.0764
1153.23	-3.15001	-8.07166	0.522845	-6.50572	3.28966	-5.66931	1.475	-2.64012	2.4348	-5.69971	6.9166
1154.94	-0.853958	-3.17264	-0.250534	0.352624	5.95437	-7.95931	5.69072	-0.748591	1.03289	-3.54421	8.84446
1156.64	-0.518565	-1.81971	-2.47209	0.895599	8.3241	0.11521	-0.844398	5.81198	-4.1799	0.0708178	7.15735
1158.35	6.45744	-8.38888	-4.5022	0.990789	8.49419	2.40017	-2.58269	12.9365	-1.5264	2.72308	0.382044
1160.05	13.538	-10.4678	-3.16033	1.52256	7.03605	6.29805	-4.07445	14.7617	2.36275	5.2796	-6.63828
1161.75	10.2948	0.764522	-3.3806	1.91156	7.15145	-2.83607	-6.50914	18.7885	3.65101	7.9738	-1.00357
1163.46	7.40818	5.30352	-3.88084	6.35813	1.79413	-0.306066	-7.50284	9.89613	-3.39951	8.17799	-8.55055
1165.16	9.69521	0.46124	-0.311653	10.2323	-4.1768	-0.147938	-10.0532	1.6664	-7.15481	4.25463	-13.442
1166.86	1.18955	0.884454	-4.73673	3.06292	-1.85976	4.88709	-1.40287	-0.328779	-4.68089	-1.6556	-7.55521
1168.57	-0.13236	-1.79909	-2.99975	-4.11055	-3.33895	1.88371	4.81293	-5.12819	6.54516	-1.73909	-0.149333
1170.27	2.73373	-5.21164	-2.82554	-7.56775	-2.66415	7.26902	6.92041	-4.22269	4.75916	2.63515	-0.739727
1171.97	6.95213	-10.3186	-1.08558	-12.5647	-0.542265	6.77241	6.99116	-6.76078	2.00049	4.09167	-0.187016
1173.67	11.3272	-9.41178	-4.21164	-7.6942	4.48943	7.84223	12.7018	-1.90613	1.02505	5.23626	-0.876928
1175.37	2.6045	-0.60795	-3.17098	-5.86222	4.21893	0.159999	14.9143	-0.143103	-2.55448	0.116395	3.2512
1177.07	1.77266	4.60383	-5.14007	5.23798	7.209	0.935178	14.3104	4.2653	-9.94256	1.38388	-1.03821
1178.77	5.40304	8.33851	-1.45234	11.3303	4.15624	3.50215	6.7911	2.83981	-13.9295	4.36977	-4.88589
1180.47	2.62002	8.31204	-1.98167	7.47224	5.13496	2.88753	6.20925	0.76657	-8.37157	2.79371	-8.07636
1182.17	6.5335	6.66819	8.44405	5.15083	-1.23989	-8.93762	-2.18791	-0.438123	5.88917	-0.728842	-6.74172
1183.87	4.61815	2.98536	9.63137	5.74665	1.29325	-10.3252	0.663398	-1.58559	4.41979	-1.56095	-8.59523
1185.57	4.45099	-1.81727	10.1913	4.96428	1.30241	-6.69706	-3.31405	-3.68698	-0.302575	-6.27917	-6.33064
1187.27	1.41517	3.12357	11.0729	4.3111	-0.136082	-5.51073	-2.05646	-7.2814	3.21486	-7.79157	-1.60428
1188.97	-1.30645	4.31215	8.10227	-1.05259	-10.2263	-0.778673	-3.51791	-14.337	2.51013	-6.23811	0.0394059
1190.66	1.58513	6.48488	4.61161	-0.557997	-9.7835	8.38334	-1.53879	-7.85741	2.67695	4.87237	4.92125
1192.36	5.25667	5.51864	4.58845	-0.90748	-17.917	10.3735	1.0793	-13.821	-1.18004	7.50792	2.89309
1194.06	1.71745	-0.05496	1.87914	-4.0112	-11.1341	7.13835	1.9493	-10.0571	-0.422868	2.46717	-2.51034
1195.76	-1.06255	2.21964	6.80872	-5.14228	-14.7892	-1.78867	-6.86457	-13.372	2.21638	-1.94161	-3.54115
1197.45	-2.23797	-4.2095	5.29959	-3.0773	-7.90053	-2.5862	-1.37575	-5.80311	4.46988	-0.0356866	0.581867
1199.15	-1.80939	-8.79981	1.81242	2.15941	-0.126135	-2.79467	7.35638	3.24873	4.19738	2.01991	2.57298
1200.84	1.16646	-7.26643	2.93631	-2.01152	-3.83259	-7.36579	0.313878	5.61245	7.42034	-4.41268	3.72836
1202.54	4.58956	-3.15969	0.778852	0.45761	-8.06725	-6.02512	-0.928686	7.50828	11.6205	-0.0150686	-0.911587
1204.23	4.87101	-2.80428	-2.9447	2.52403	-5.37128	-4.7826	6.35771	5.6103	12.0774	6.36392	6.41875
1205.93	2.84714	-3.40107	-4.19266	4.22875	-10.3257	1.88168	6.48209	-4.54944	3.93836	4.98938	-4.02159
1207.62	-2.36991	-3.86303	-4.78372	0.711166	-4.50225	4.23522	7.18157	-4.02426	0.693584	-2.24376	-4.82745
1209.32	-4.45103	1.35675	-1.89407	-2.59988	-7.08003	1.09826	0.919823	-5.96968	-0.493435	-6.98135	2.16946
1211.01	-1.72868	-2.49819	-1.60493	-6.07277	1.27111	-0.478527	1.14076	0.85651	4.77682	-4.49993	5.20878
1212.7	-0.814628	-1.22331	-1.10032	-5.05473	-1.28121	0.991577	6.48915	3.71826	3.15529	0.745342	4.72467
1214.39	1.42822	1.76958	5.91349	-1.63505	-4.19561	-0.872666	-5.29968	4.10746	5.98417	5.05951	-1.19207
1216.09	2.52254	3.97378	8.05044	2.41338	-1.86701	-0.574109	-1.69129	5.39405	8.83301	17.4816	-6.6015
1217.78	2.48279	6.8397	3.92808	8.34284	-4.56309	-5.81758	-0.308544	3.09034	4.94407	14.661	-1.63121
1219.47	2.47685	0.755127	4.03261	13.0238	2.16357	-1.66327	-1.5534	9.37906	2.69657	6.20456	-2.25611
1221.16	0.57782	0.908784	4.00733	14.1081	4.4802	1.48088	3.70658	13.7947	0.720232	0.435121	3.6588
1222.85	-1.10895	5.59594	-0.264736	11.0174	3.2368	4.56142	-4.88325	12.607	-2.78563	0.0207469	-1.04807
1224.54	-4.68623	3.19869	-1.68898	7.66437	1.52382	1.77688	-5.04944	7.74562	-0.712617	-2.92766	-6.29448
1226.23	-6.51799	3.6837	3.41633	7.31955	-8.00603	2.95838	-3.4511	3.37615	0.265687	-2.68797	-6.62295
1227.92	-5.20398	2.95416	5.65449	7.69255	-4.15239	5.79219	-1.70061	-2.11061	-0.260909	-5.25999	-3.93809
1229.61	-5.79965	0.271649	0.982276	2.40161	-6.52935	8.17441	7.95976	-7.16608	0.395755	-3.79154	-1.16053
1231.3	-2.17361	-0.0198034	-2.1692	0.812231	-10.561	0.812124	7.63328	-7.39435	0.473425	-12.3096	6.90917
1232.99	-0.446339	-9.05283	-2.12183	0.888744	3.47669	-1.55767	6.97655	10.1826	5.59383	-10.8353	9.66079
1234.68	0.681267	-6.11599	-1.32108	3.40071	0.0150679	-0.497187	2.37197	13.6396	8.1182	-4.53452	6.69894
1236.37	-0.633757	-2.5515	-2.17471	2.63219	-3.93068	1.57133	-6.78744	11.3612	8.80985	3.83864	2.4287
1238.06	-0.27678	-5.3871	-3.87876	4.7344	-12.4055	2.0527	-10.4147	10.5128	2.42209	5.23014	-2.45579
1239.74	-2.5112	-3.75348	-1.63508	3.59236	-13.0321	-0.424133	-11.7402	7.91025	0.446908	5.77085	-3.20448
1241.43	1.14725	-1.01463	1.20264	0.234165	-12.165	-1.86489	-5.76458	3.88866	-0.658441	-3.68906	1.27019
1243.12	2.23021	-0.433294	-0.827341	0.829955	-11.8239	3.14972	0.941969	0.933312	0.784379	-5.34405	-4.45619
1244.8	2.44046	3.31173	-1.3736	-4.23631	-7.19559	3.20492	4.43599	3.93595	5.57815	0.0518291	-0.95884
1246.49	1.41056	-1.26134	1.74695	-3.1269	6.72134	-0.729669	4.83992	18.6476	12.067	5.15392	-2.81602
1248.18	-0.857589	2.29043	1.73765	-0.0294257	7.93438	0.949885	2.23085	12.3138	12.9566	4.67635	-3.20247
1249.86	-6.75654	3.95731	2.05037	1.01822	7.4369	4.80426	-0.115563	5.94559	9.37367	4.69335	-3.68773
1251.54	-6.79151	2.76128	-0.103366	3.81678	7.46846	5.36297	-1.53695	4.35508	0.230851	2.59891	-4.34396
1253.23	-10.1455	5.95777	0.176666	2.17216	7.70447	3.79793	-4.27333	-0.497641	-4.97241	2.96185	-3.32983
1254.91	-5.1017	9.18015	3.04397	2.29241	3.09185	3.23982	-6.00441	-3.4021	-7.91309	0.0446178	-3.43034
1256.6	0.890731	5.25992	3.1873	3.10981	2.3802	6.01358	0.768045	-3.53545	-2.75014	1.15093	-7.92911
1258.28	1.63404	3.76337	1.53889	-3.96776	0.655014	5.29812	2.88009	-1.39742	3.43392	7.35614	-1.81608
1259.96	4.06324	-1.34563	3.46433	-2.76991	3.75566	2.25249	3.49452	6.4532	5.95397	1.01596	3.35677
1261.65	2.36453	3.59363	2.10443	1.16144	-0.360432	3.65056	-0.150377	6.23732	5.22498	2.6403	2.95549
1263.33	-2.93125	3.17353	2.42311	0.760277	-1.29096	1.13892	-0.395741	3.6046	8.75005	-0.553614	-0.706966
1265.01	-4.43835	2.84511	-1.95706	4.42629	0.916622	0.479388	-1.80728	6.69928	4.53112	-3.71295	-0.858346
1266.69	-9.83841	3.08288	-3.87881	2.38003	-2.00888	2.471	-7.04068	1.56267	0.951469	-3.46935	-6.25889
1268.38	-7.82796	2.53678	-4.81626	0.259126	-0.242197	3.72784	-5.69613	2.15517	0.417237	-1.57742	-6.38485
1270.05	-7.44479	-5.51696	-7.94809	-2.73412	0.420431	-0.301026	6.27939	1.28213	2.05358	-3.81002	-3.37367
1271.74	-6.92515	-9.07751	-7.51095	-9.41925	-1.30303	-3.70688	8.67052	-1.97965	0.748476	-4.82759	0.114687
1273.42	-8.3106	-4.17371	-2.25729	-5.738	0.309143	-3.14462	3.48884	-2.4303	-2.86175	-6.99546	1.67625
1275.1	-6.48586	0.137368	0.0977869	-2.94609	-2.71396	-3.70683	0.456621	1.30987	-1.84087	-4.51627	0.593222
1276.78	-7.68544	-0.718667	1.24907	-4.95844	-2.18338	-5.53582	-3.52213	-1.83423	2.5884	-5.46386	-3.52897
1278.46	-5.73767	1.04328	-3.26436	-1.99813	0.698238	-3.55921	-5.00963	-1.27199	-0.76364	-2.88451	-7.49193
1280.13	-9.68207	1.3118	-6.01841	-6.14459	0.591331	1.35182	-5.15186	-5.39499	-0.153552	-1.29013	-8.86074
1281.81	-7.54149	2.50383	-2.52192	-2.93612	-2.10205	2.94909	-1.8244	-1.01153	4.06801	0.858341	-4.91471
1283.49	-5.24325	1.73522	-4.33391	-4.56159	-6.76232	4.84036	0.40384	-2.30185	0.313351	0.896854	-2.31759
1285.17	-5.7885	1.74022	0.688953	-2.5429	-9.42983	4.64706	4.94004	-5.60432	-1.55081	-0.254977	2.901
1286.85	-5.90988	3.93614	3.62029	1.37731	-8.00051	3.09118	1.97898	-5.78605	-5.2606	-5.18151	3.28137
1288.52	-3.02629	3.46474	1.40036	1.84133	-5.55751	1.56968	0.466967	-2.89768	-4.42762	-5.47161	2.57896
1290.2	-1.67481	-0.862931	-0.918524	-1.57665	-0.962474	0.0414484	0.550249	-0.272225	-2.55871	-4.56988	0.788893
1291.88	-0.473534	-2.28552	-4.21292	-0.593697	4.87939	-0.687387	7.45358	1.26387	-1.92562	-0.500379	-3.68758
1293.55	-3.48139	-2.7941	-8.90852	-2.97312	6.76582	-2.02547	11.5318	1.11734	-0.415438	-1.72305	-0.867619
1295.23	-3.08533	-0.369357	-6.83209	-1.07255	1.06229	-2.75435	11.7449	-1.67419	2.80244	0.228824	-0.673869
1296.9	-0.191969	1.83137	-5.42085	-1.72232	-3.00572	-1.10292	4.62006	-1.63896	1.14226	4.18611	-2.38739
1298.58	-1.91411	1.70171	-2.20197	-2.91229	-3.74444	-4.47066	3.93788	-1.78913	2.98875	-0.920768	2.5201
1300.25	1.9438	3.99557	0.204581	-5.33255	-4.70593	-7.59156	-0.474079	-1.81739	3.51946	-5.12493	2.51541
1301.93	3.67352	5.47146	-0.438187	-4.09239	-0.893488	-7.21355	-3.5847	-0.80447	4.10462	-4.19203	3.68495
1303.6	4.49923	1.47836	-0.409849	-4.49784	0.403624	-6.97759	-4.08841	-0.774758	1.19113	-5.18429	3.11062
1305.27	3.05409	-0.759916	0.455491	1.53133	5.09248	-3.97857	0.0775367	1.82023	1.00993	-1.55614	0.592482
1306.95	0.228618	-2.16975	-1.55817	2.58239	4.63125	-3.89744	1.98356	1.77639	-2.80405	-4.17374	3.56604
1308.62	0.10651	-2.98986	-1.67906	4.51163	1.10595	2.66858	3.33931	0.656621	-3.40321	-2.29084	1.65064
1310.29	0.555304	-6.8241	1.11432	5.98235	-0.102595	2.14804	3.34112	2.02308	-3.57613	-0.280417	0.988467
1311.96	-1.95464	-7.69025	1.83957	1.26558	1.80921	3.68831	4.54633	3.96074	-1.72913	-3.12301	3.56919
1313.64	-0.608077	-4.58418	1.1389	-0.804928	2.32092	2.05381	2.93102	3.90225	0.648676	0.43097	4.98381
1315.31	-2.72366	-3.35373	-0.735354	-4.42396	3.64772	-0.068994	1.58679	1.54588	2.91925	-2.19576	7.08933
1316.98	-3.88979	-0.592505	-1.6485	-6.58388	0.814539	-5.12594	-5.88432	0.403221	0.69765	-2.97549	7.22269
1318.65	-4.05374	4.02212	-0.727248	-3.99448	2.64956	-4.56046	-8.97173	3.43671	0.311436	-2.71593	5.24335
1320.32	-5.04638	9.81284	-1.24338	-6.58976	-1.56779	-6.85218	-11.0749	-0.183293	-0.584952	-3.19873	6.22041
1321.99	-3.16589	10.1134	-1.60392	-4.55846	-2.80126	-4.3545	-7.47534	-0.373558	0.108458	-1.13162	5.32065
1323.66	-2.72492	8.97295	0.142459	-2.81538	-2.52688	-4.05426	-2.88803	-2.19167	2.00713	-0.180151	4.44783
1325.33	-1.89411	7.70178	0.2004	-0.322715	-3.42345	-0.913497	0.637211	0.214461	2.94013	2.75308	3.08562
1327	1.12896	4.96492	-0.719947	3.12889	-1.60484	-0.368338	1.06131	0.681601	1.81823	4.15339	0.847756
1328.67	-0.378391	-0.838167	-1.35308	4.37304	-0.0463612	0.644857	1.82609	0.426659	0.199213	0.666208	-1.26983
1330.33	0.935656	-3.2602	-1.86194	3.43247	1.90851	-2.9607	-0.638465	1.94592	-2.70953	-1.76874	-2.45384
1332	0.16152	-3.09044	-3.24307	2.58931	5.39323	0.782828	-1.92068	4.71348	-6.7004	-0.382372	-4.4214
1333.67	0.614983	-0.356597	-2.92023	-1.40001	2.92187	-1.3815	-1.88711	1.52289	-5.3028	-0.862194	0.294864
1335.34	0.0675243	2.76427	-3.19197	-2.34722	0.53964	-2.83743	1.71304	-2.27561	-4.41026	3.27905	2.65926
1337	0.764061	3.22039	-2.89441	-2.28391	-0.820893	-2.9612	7.00327	-2.98117	-0.075162	2.90374	1.68586
1338.67	2.77585	-0.808709	-2.86063	1.25459	0.244068	-3.91604	10.0918	3.10952	1.14278	4.17161	2.28409
1340.34	3.79507	-3.36475	-1.66301	2.60792	-0.847146	-1.93287	7.78536	1.71276	0.97453	3.86277	-2.42012
1342	1.1812	-5.88978	-1.9651	7.80848	2.57255	0.727657	7.45991	3.24229	-0.178532	4.31749	-3.79646
1343.67	-1.28121	-5.63474	-0.149804	4.7785	4.76729	-0.518808	4.19216	1.37304	-0.703122	0.566447	-2.31975
1345.33	-5.01406	-6.37245	-1.5497	3.118	7.23017	0.0559196	1.71119	1.7965	-2.75042	0.650595	-2.53771
1347	-5.69559	-3.60171	-0.557481	2.22116	4.63861	-0.154372	0.155903	-3.74817	-3.11494	-0.922963	-0.668794
1348.66	-9.01489	2.37686	-0.432889	2.45615	3.29121	-0.164426	1.51217	-8.86561	-3.92788	2.04788	1.68585
1350.33	-7.79025	2.48925	-0.431466	2.23647	1.79145	-3.55328	6.32115	-8.55997	-3.4517	0.590428	1.92567
1351.99	-6.38714	0.271452	-1.45393	2.5124	3.04016	-3.70715	5.36475	-3.42101	-5.48942	-0.126162	3.57996
1353.65	-5.04264	2.43378	-0.0744845	-0.226279	-4.30083	-1.52344	2.59405	-10.5596	-3.56556	0.671347	1.89898
1355.32	-3.96959	4.26387	0.141867	4.91839	-2.37196	-2.1817	1.94924	-7.9695	-2.73329	2.01938	1.88762
1356.98	-3.09011	3.65019	3.02273	4.86405	-0.560795	-1.9143	1.7355	-7.43477	-0.936929	3.7066	1.81832
1358.64	-1.82101	1.06738	1.97762	3.84504	-2.06714	-1.77725	-0.976384	-6.28484	-1.15775	5.57177	-2.30786
1360.3	1.13427	-2.44793	0.139265	5.09402	0.43975	-1.39645	2.78578	-1.75666	-1.36747	5.17242	-2.49273
1361.96	2.15191	-0.496557	2.14941	6.47646	1.18355	-4.28937	0.646584	0.296849	0.539217	4.27759	0.218655
1363.63	2.19735	-2.38132	0.898649	4.20515	3.38091	-9.20282	1.43766	3.83237	1.05079	2.94054	1.66991
1365.29	2.43671	-4.65537	1.61963	4.48618	3.66035	-7.95587	-3.02107	7.88207	1.50123	1.54533	2.15349
1366.95	-0.365599	-3.56409	2.67553	0.638099	0.347357	-8.25142	-4.26385	1.61098	4.87864	0.102174	4.90314
1368.61	-1.49832	-4.21646	1.80166	1.8009	3.27098	-7.06403	-3.67495	2.98189	5.7569	-1.44783	4.59089
1370.27	-4.70811	-2.5664	1.34232	1.72223	2.06636	2.0428	-5.83188	-2.31244	1.28071	3.56237	-1.27989
1371.93	-6.68443	0.42471	1.51378	1.29514	-0.5889	5.71663	-8.77599	-4.47808	0.639799	6.06362	-6.93433
1373.59	-5.76963	-0.533503	-0.886097	-0.840419	-1.84463	7.04264	-2.984	-7.58197	-2.28718	2.24252	-5.83581
1375.25	-3.09792	1.32774	1.35646	-0.577559	-4.87263	3.20852	-3.0417	-7.38373	-1.99658	0.218328	-4.44755
1376.9	-0.836334	2.23837	0.236042	-0.784676	-0.214871	0.229519	-2.43558	-2.6445	-2.70977	-0.689602	-1.46614
1378.56	1.30234	4.13982	3.88095	0.681017	-2.502	-0.681624	-4.27825	-0.573661	-1.08996	-1.11335	0.0600738
1380.22	1.4023	2.16353	3.4661	0.164956	-3.25685	-1.06343	0.395035	1.05646	0.20224	-1.6925	5.90857
1381.88	3.19749	-0.619495	3.03747	2.1715	0.933155	2.41617	0.370791	3.16095	-1.22078	-2.61317	7.33581
1383.53	1.28631	0.153509	2.82076	4.25703	-0.852488	1.76322	-0.87254	-1.16091	-3.04115	3.4882	3.48414
1385.19	-1.6804	-0.407955	4.22537	4.54323	-1.22418	-0.547364	0.169683	-3.18898	-1.41966	5.74145	0.702713
1386.85	-3.99919	-5.3397	3.40337	1.85806	-3.72122	0.262633	2.93559	-7.82743	-2.41751	5.03921	-0.874881
1388.5	-1.8951	-9.43604	2.04671	-0.390027	-4.08623	-4.37654	5.15746	-4.34955	-0.903638	3.6725	-2.61839
1390.16	2.23546	-8.2962	2.0867	-1.6682	-0.0304208	-4.81065	2.94349	1.66659	0.00919381	1.81864	-0.652638
1391.81	4.34454	-5.90206	4.76072	-0.851204	1.92426	-2.59819	-0.40782	6.45129	2.86545	1.12939	-1.59081
1393.47	3.45587	-5.9474	4.4205	-3.79767	3.02097	0.527274	-0.409862	6.27448	4.1101	-3.78139	2.47758
1395.12	3.19914	-3.60259	2.69967	-4.75595	7.07124	4.46749	-4.04472	5.03123	1.40305	-6.11699	2.07422
1396.78	1.88643	-2.31642	3.69888	-3.28628	3.28769	4.47642	-3.1714	-0.126262	2.02167	-4.22907	0.442946
1398.43	-0.943756	-0.326887	4.76689	-4.39815	4.23218	3.85473	-4.83851	-2.28053	1.87968	-4.70557	3.04639
1400.09	-3.04619	-2.92167	2.7322	-7.92659	0.150199	1.96673	-2.94297	-4.68447	1.53822	-7.53605	5.84374
1401.74	-3.4141	-3.30036	2.23546	-10.4065	-5.7087	-1.93539	-6.17795	-7.07498	1.88674	-9.92985	5.88638
1403.39	0.28728	-5.42196	4.26824	-8.60802	-3.97764	-1.34309	-2.91918	-0.491563	3.8027	-9.72669	6.82697
1405.04	2.91608	-2.69311	6.66884	-6.70949	-5.14343	-3.8036	-2.56256	2.62825	6.80483	-5.91951	7.57137
1406.7	2.45261	-4.60202	6.97652	-6.66383	-3.01993	-3.10629	0.227234	4.75511	9.06106	-3.21606	5.7796
1408.35	3.29358	-3.36328	4.21599	-7.27288	-3.09515	-1.08121	-1.67314	3.22878	6.07202	-0.926111	-0.366086
1410	4.46424	-3.46402	3.85328	-1.36599	-3.2613	3.34494	-0.558069	0.677542	2.12501	1.67886	-6.04925
1411.65	5.90336	-0.656403	2.2855	-1.29858	-3.39932	6.6228	-1.8757	-1.53115	-3.28429	1.24916	-4.53439
1413.3	6.48803	-0.635629	-0.854954	-2.68416	-4.78217	5.72034	1.81054	-2.99174	-6.04791	-1.7997	-0.446674
1414.95	5.12855	1.41627	-0.840511	-3.84968	-4.87367	5.09423	-0.394674	-6.03931	-6.52173	-3.49109	2.46489
1416.6	3.80464	0.853439	-0.789254	-2.77508	0.681998	2.98555	1.84622	-5.02906	-4.37989	-5.17948	1.19845
1418.25	3.20525	7.32073	4.02493	-1.91384	-0.940091	-2.64316	-2.65167	-6.49329	-1.15121	-1.24879	3.94917
1419.9	2.86424	3.11946	2.64107	-0.640276	3.16552	-0.300621	-0.36446	-1.16952	1.80253	3.71958	-2.10289
1421.55	2.22427	5.69072	3.91033	-0.646977	1.69153	0.927926	-4.80694	1.07679	3.53635	4.61866	-5.64779
1423.2	2.76047	4.62865	2.2152	0.620392	1.21677	5.04893	-5.22969	2.22632	0.463424	5.46427	-5.55976
1424.85	4.29691	4.14404	0.566016	-1.74822	-2.68307	5.96117	-3.52019	0.298171	0.796472	4.48761	-5.18166
1426.5	8.13373	1.60105	0.886556	-1.7404	-3.16448	3.08759	-4.36368	6.4182	2.11012	2.35119	-0.68039
1428.14	7.89994	-1.04522	1.77603	-1.82325	-0.799356	3.65433	-6.40218	4.0436	0.0537631	-0.431993	-1.19023
1429.79	5.3397	-5.37576	1.46829	0.828602	2.89701	1.17784	-6.98448	2.88615	-1.81205	-3.64278	-5.09242
1431.44	1.99053	-3.62951	1.52262	0.701647	3.92874	-1.08462	-7.96297	2.14868	-1.8559	-0.94492	-4.25427
1433.09	-0.413448	-9.39467	-3.32293	1.45676	4.70426	-0.774447	-2.07156	0.792865	-4.22449	1.96613	-7.12114
1434.73	-3.06854	-8.32118	-3.47979	1.07582	5.88272	4.95921	0.464735	4.19293	-3.43489	1.74015	-5.53383
1436.38	-4.60898	-8.48826	-7.057	-2.21243	7.66962	9.09724	5.92056	6.09392	-4.33068	-0.647932	-0.665111
1438.02	-2.1831	-4.85596	-7.64928	-4.49839	4.73638	6.50728	6.05853	5.38238	-1.82559	-0.829652	0.45216
1439.67	0.0173014	-0.94748	-4.70482	-1.91555	-0.409124	3.33041	2.05402	5.75843	-1.05902	0.600548	1.11505
1441.31	2.38883	-0.282642	-3.75653	-6.01725	-1.18557	6.37753	1.85998	-1.06431	-1.71049	3.29465	-1.88533
1442.96	5.93526	-2.03548	-4.77101	-9.27143	0.229334	4.90564	4.22336	-2.97751	-3.04472	0.992635	3.63159
1444.6	4.74301	-0.741319	-7.44391	-8.06416	-2.71947	4.89791	5.1924	-6.56066	-7.58725	3.77359	5.26866
1446.25	3.01397	-1.75661	-7.92605	-8.01105	-3.13316	4.61336	2.52784	-9.87852	-11.2781	2.46202	3.76332
1447.89	0.790152	-1.98686	-7.74781	-7.91461	-0.665426	5.52845	1.32667	-6.70484	-10.4578	-0.157154	1.80994
1449.53	-3.58009	-2.37234	-9.53874	-8.57678	-0.724108	5.56121	4.02384	-4.72198	-11.5778	-6.72863	1.97108
1451.18	-1.45049	-4.12875	-9.06881	-6.13953	2.48467	2.58012	5.25222	1.14387	-6.57073	-6.25885	2.82465
1452.82	-1.20802	-4.66453	-4.65359	-2.19649	2.9699	2.2798	4.95268	4.96673	-1.94955	-2.52358	-1.0262
1454.46	-0.289887	-4.46239	-4.40608	-3.17689	7.04262	5.11306	2.30986	4.50136	1.4257	-0.138688	-4.86866
1456.1	1.57999	-3.31953	-2.83249	-3.04138	9.13039	5.20641	-0.561193	4.19752	3.7466	-1.56774	-1.89305
1457.74	0.215989	-0.729201	-1.97035	1.32501	5.9578	5.97191	-4.85493	-2.02554	-3.1686	2.88505	-8.21103
1459.39	-3.61202	1.97732	0.578574	2.82807	7.07693	7.99032	-13.0439	-4.11085	-5.93334	4.10489	-7.82655
1461.03	-0.909227	5.79597	1.13957	2.17777	2.77363	6.65448	-15.045	-2.3416	-8.46047	6.34265	-9.64226
1462.67	-4.99676	6.18858	0.839109	-1.38235	-0.941303	0.591293	-11.2286	-4.19621	-7.36909	-0.109521	-4.1138
1464.31	-2.44432	3.27824	-0.991274	-1.02692	5.05914	-2.6293	-3.36939	1.59195	-4.60422	1.38855	1.11323
1465.95	-2.73497	2.13619	1.14702	0.436505	4.91865	-4.41693	-3.23052	4.04885	-0.0505299	1.8492	2.67303
1467.59	-2.10753	5.47468	-0.67619	-0.147886	0.194718	-4.15102	-5.83172	-2.75081	0.107724	-0.564991	2.28986
1469.23	-0.491568	6.41658	-2.06028	-1.50543	3.85681	-4.00501	-2.01509	-4.36999	3.19456	-1.83255	5.3226
1470.87	4.56654	2.08612	-4.54887	-0.530077	7.34744	-2.82221	-0.085813	-2.39689	0.126064	-0.319992	-0.750548
1472.5	5.5397	0.869269	-1.47413	1.75148	7.94163	-1.82213	-0.220945	0.431483	2.48294	-4.14198	4.57287
1474.14	10.2951	4.30508	-1.45392	-2.07342	3.68936	-1.67191	-1.41076	2.0811	2.63124	-3.85163	3.81177
1475.78	7.93134	3.94067	-1.10139	-2.86795	0.435838	-2.56987	-0.39948	1.6079	2.49594	-6.0354	-0.106006
1477.42	7.28874	0.979671	0.0160318	-2.30203	1.85088	-6.18896	3.31385	4.15751	5.13785	-7.20463	1.22558
1479.05	10.846	2.25259	4.4306	-0.0400533	-4.53024	-3.85045	-5.07127	3.01449	5.73734	-2.95621	-6.49403
1480.69	8.81556	6.07604	5.07542	2.18774	-11.7359	-0.205114	-7.69599	-2.1073	0.981087	-2.41872	-8.69709
1482.33	7.51048	2.88948	2.85363	2.48411	-2.7803	6.70851	-1.78891	2.45009	1.71216	0.365911	-4.7866
1483.96	10.4376	-3.27715	4.79882	6.16451	0.657412	4.43617	-4.33791	8.13785	1.70102	3.45505	-9.77143
1485.6	8.85532	-3.18593	4.11207	7.10697	0.734993	-0.283204	-6.52697	7.13139	1.49766	2.99884	-4.99783
1487.23	7.84279	-6.20601	0.286485	6.94427	0.20817	-3.84295	-7.60959	8.53703	-1.44945	3.01779	-3.38595
1488.87	3.92231	-8.48023	-3.51248	7.35535	-1.76333	-2.40832	-0.746009	6.34068	0.748666	1.68855	-2.97631
1490.5	4.32016	-6.26966	-1.21234	5.54278	-6.76378	-6.47334	-4.70079	-0.975097	3.47422	-5.76947	3.04479
1492.14	5.91277	-1.73004	0.253466	5.57821	-6.02724	-5.36005	-7.42832	-5.16093	3.38778	-3.38787	0.040459
1493.77	2.1995	2.64948	-2.00269	8.03735	-0.482804	-1.27757	-2.88496	-3.23294	0.198691	0.0184048	4.15997
1495.41	1.1175	4.44669	0.701867	7.99052	-2.28644	2.23792	2.16209	-3.32627	1.15288	2.63733	1.15805
1497.04	3.41323	1.91553	2.67808	6.09141	-3.00001	1.28673	2.26215	-0.681865	0.290168	1.33502	-0.917127
1498.67	2.88637	-0.356135	-1.10705	1.91048	-3.31189	1.25822	2.40818	-0.145926	-3.51364	-1.88314	3.03315
1500.3	1.12265	-3.00375	-3.40605	1.60148	-0.292908	2.29754	3.37433	1.59076	-7.69929	0.323629	1.47908
1501.94	-0.286787	0.0191924	-2.09846	-5.06636	-5.8797	2.78979	2.51446	-2.10501	-3.48424	-2.60838	2.14191
1503.57	-0.21956	1.4746	-1.1467	-4.60942	-7.22216	2.01615	-2.91589	-4.811	-3.72848	-2.4438	0.421043
1505.2	-3.19121	2.70698	-2.31233	-2.41162	-3.33457	-0.643073	-4.36598	-5.53741	-3.73604	0.9574	-1.05867
1506.83	-1.47017	2.2247	-1.10276	1.39181	1.34974	2.90283	-1.28224	0.60997	-4.82311	6.77423	-1.27756
1508.46	1.37036	4.456	4.75337	1.1829	-7.0771	-2.57828	-3.20867	-5.65192	-0.92418	3.85889	-5.38513
1510.09	4.71463	2.10052	3.51452	-2.07789	-8.36708	-5.3191	0.063245	-5.50721	0.241599	-0.649612	-2.98545
1511.72	5.16286	0.829233	2.1362	2.30717	-6.47215	-3.61207	0.495238	-3.12764	-1.29232	-2.4283	0.59313
1513.35	6.61214	2.99213	2.16445	2.96787	-1.55972	-0.927879	-0.146276	2.58922	-0.361226	3.33811	-0.617118
1514.98	9.37275	6.00245	3.16066	-3.37696	-4.89145	-2.27024	-4.51382	3.12784	2.7536	1.75551	-0.954983
1516.61	8.62238	3.73137	1.98946	-0.320422	-0.860996	1.42762	1.69119	6.39942	5.14105	6.29776	-2.07239
1518.24	7.05564	7.40834	2.0047	-1.07882	-3.06078	1.93822	1.75492	-0.0695755	2.30601	5.91802	-1.62808
1519.87	6.03617	4.80204	4.57968	-3.79476	0.14323	3.08541	-0.306906	-1.30533	1.84447	4.41815	-2.17903
1521.5	5.91741	1.18327	2.69138	-6.00181	0.841573	-0.21365	3.97325	-3.41829	4.02525	-1.22609	4.21083
1523.13	2.671	-0.532758	2.2173	-5.51708	-0.142965	-2.9592	9.0592	-2.01151	3.66068	-2.65516	7.61655
1524.75	-1.34178	0.0969006	1.76789	1.72115	2.85538	-2.93206	6.76306	3.82892	2.69755	-1.80955	6.88457
1526.38	-4.79962	2.47947	-1.36891	3.43076	2.33235	-1.19243	4.18259	8.02207	1.59628	2.4823	4.87817
1528.01	-8.64436	8.60591	-1.88687	4.6603	1.59338	-0.41033	-2.64407	7.10565	-2.08892	6.35945	-0.550862
1529.63	-8.17774	8.73134	-0.0127647	6.12605	2.32429	-1.40313	-1.06809	7.44673	1.23566	5.15978	0.166061
1531.26	-8.11446	13.2366	1.13184	1.76356	-0.720117	1.25193	-2.622	-0.341934	-1.06011	4.07166	-0.224418
1532.89	-4.8118	9.30188	5.25854	1.82682	3.08078	2.50266	-8.177	-0.519797	-0.450155	2.22947	-2.89465
1534.51	-0.795846	4.64444	1.76805	0.847562	5.46674	4.68912	2.74221	4.26898	2.51149	2.52496	4.40575
1536.14	-3.68538	0.140123	5.30726	-1.29878	3.25419	1.18289	3.0508	1.8907	4.90561	1.38166	3.8722
1537.76	-3.8656	-1.29341	4.783	1.08225	4.94355	1.82548	4.4892	2.40644	3.43842	-0.689784	1.74483
1539.39	-3.29927	-1.41929	3.71523	-0.0986753	-0.593524	5.97299	0.0795926	-0.720624	-0.785902	3.19277	-2.29959
1541.01	-3.97164	1.4338	6.12404	-0.999579	-0.434636	4.42865	-3.47315	-4.96755	-2.49896	1.54754	-2.91543
1542.63	1.21108	-0.434342	7.15607	-3.22262	0.89212	-1.4821	-6.30551	-1.59196	0.799914	-4.41745	1.31309
1544.26	0.13886	2.0599	6.72512	-4.76552	2.11163	0.0318473	-10.178	-4.56977	-2.1068	-4.09076	0.073441
1545.88	1.84994	0.913945	8.03096	-4.00957	3.52629	-3.10989	-9.96387	-2.64279	4.39185	-3.55686	2.43832
1547.5	-0.591852	-0.561777	3.52269	-1.65268	4.58838	-6.72465	-2.17155	-0.494345	4.51394	-3.02096	4.58038
1549.13	-5.16236	-1.66448	3.32772	-3.99472	1.35737	-7.97697	2.31769	-5.58317	2.53175	-3.36502	1.18402
1550.75	-3.99056	0.487208	0.406892	-3.66994	-3.49554	0.106599	5.71128	-4.09044	0.532943	-2.39443	-0.127987
1552.37	-2.56077	-2.79095	0.382489	-0.159488	-5.25433	3.14498	4.15407	2.09793	-0.185892	1.98628	-2.24606
1553.99	-2.00982	-3.4663	-1.95099	-2.48662	-5.30113	4.39822	6.87246	-0.865708	0.278688	-2.4597	-0.609029
1555.61	0.571899	-1.58672	-3.39077	-2.81467	-7.36608	7.11538	4.9578	-0.493777	-1.20238	-3.39452	-2.9264
1557.23	2.4327	-0.0025294	-5.45394	-3.27033	-4.70975	6.24577	2.29565	-4.20002	-3.86996	-1.37997	-5.43988
1558.86	0.692561	-2.28122	-5.65176	-3.64902	-2.634	3.94975	5.86795	-1.90827	1.63166	2.74464	-2.8527
1560.47	-1.99768	-3.09595	-0.732322	-0.308625	0.582619	1.65644	6.89597	-3.51553	2.58593	1.18938	-3.66518
1562.09	-2.52899	-2.61386	0.391116	-4.06209	1.72961	0.802717	9.26168	-3.32663	3.7905	0.195685	0.923823
1563.71	-3.15587	-1.55344	1.9368	-4.16304	-0.203347	3.4055	3.49812	-2.66467	3.42317	1.15941	1.40403
1565.33	-3.67896	-7.1448	-1.32603	-4.49701	4.74998	4.42773	3.81366	4.74873	0.632711	1.57338	7.04578
1566.95	-7.03999	-6.79783	-3.56756	-9.02545	8.17698	3.65216	3.56582	1.36972	0.138682	-3.24037	9.99902
1568.57	-9.02957	-4.72827	-5.74239	-8.72374	7.3026	5.92357	5.40287	0.719856	-3.29367	-4.17375	9.4181
1570.19	-5.05529	-4.24263	-6.55599	-3.78882	6.01372	2.29391	4.79446	1.44363	-6.93492	-2.6302	4.32586
1571.81	-4.89954	-4.52352	-7.09746	-1.16988	4.3341	2.42421	7.15078	0.952062	-9.01543	-2.29231	1.7027
1573.42	-0.704467	-0.633032	-1.12109	1.74503	4.05048	-0.134296	3.43679	-0.6562	-5.3038	-1.13215	-3.44232
1575.04	2.93764	0.73677	2.47047	3.40852	-0.808904	-2.63614	-0.00897945	0.0245299	-1.79784	0.0673289	-5.96188
1576.66	4.28212	-1.94093	5.94121	2.88654	-7.07907	-7.10809	-3.52796	-1.45683	0.83169	-2.43356	-7.86103
1578.27	5.734	-4.28734	6.9102	1.28023	-5.51419	-7.17105	-0.638671	2.71958	3.94175	-3.27254	-2.80778
1579.89	3.25536	-4.46609	4.76083	-2.1403	-1.71843	-7.50387	2.26694	1.96028	6.58687	-3.5304	0.595142
1581.51	2.35121	-2.78483	1.38637	-1.73732	1.27291	-5.23494	6.52399	3.09685	4.36165	-2.02864	3.9644
1583.12	4.88658	-4.93761	0.953292	2.30574	3.24762	-5.99034	6.92154	7.56923	5.25674	0.484899	4.25024
1584.74	3.97166	-5.36317	-1.19329	2.36388	4.63619	-4.32939	9.2137	2.9279	1.88785	-1.22338	5.51531
1586.35	4.8693	-2.7561	-2.23009	2.82907	8.79444	-1.46255	5.56127	3.46172	-1.5244	2.29915	0.911878
1587.96	3.83779	-0.131996	-1.14631	3.51711	4.92601	0.701446	-1.11993	1.4584	-5.3394	4.6546	-4.97427
1589.58	2.65498	-1.59878	0.0122496	2.5951	0.175451	-3.7954	-3.39012	1.08998	-4.49033	-1.70596	-2.17542
1591.19	1.56964	-0.0119638	-0.690131	2.26724	-1.42823	-1.23291	-1.67579	-1.49627	-4.96738	-0.93756	-2.08427
1592.81	-0.208918	1.61668	-4.02078	-0.259988	1.22677	0.661482	-1.82737	-1.83498	-3.9119	2.94027	-1.53632
1594.42	-1.70185	3.79601	-3.8249	-0.227183	3.29183	1.13988	-2.8286	-1.88981	-0.811494	3.56336	0.0531939
1596.03	-1.98326	1.6682	-0.807649	0.579572	1.3979	-1.46568	-4.55258	-2.19369	3.89044	2.05148	-0.846485
1597.64	-1.98748	1.41843	0.519505	-0.130815	-3.66786	-0.572769	-6.33704	-6.02066	2.12136	0.721368	-3.62499
1599.26	-0.0255039	-0.131795	1.70344	1.58554	-3.23196	0.30756	-4.69276	-3.39769	0.437597	1.01254	-7.47872
1600.87	1.06995	-0.349457	2.62243	-0.0210915	-3.76868	-0.623671	-1.34533	-2.3539	-0.45603	-0.460986	-5.63168
1602.48	2.80472	-3.47122	-0.326059	-0.837274	-2.80422	-3.96685	1.21941	-1.26762	-1.90227	-5.43872	-4.50806
1604.09	4.47644	-3.80045	-3.65397	-4.861	-5.05048	-1.25346	4.34539	-4.24707	-2.31505	-2.50298	-2.70671
1605.7	4.36184	-2.3749	-6.36131	-4.70143	-3.35867	1.71188	3.55074	-0.820454	-2.6492	2.14241	0.827024
1607.31	-0.369126	-0.956981	-6.22357	-4.18056	-2.09483	3.57815	2.78889	-1.17892	1.55092	3.16934	4.91704
1608.92	-4.09545	-1.01511	-3.98513	-2.28045	-2.44834	-0.344556	-0.241255	-3.50551	1.88903	0.338626	7.79208
1610.53	-2.11899	-1.81252	-1.84756	0.542109	-6.6157	0.110402	-4.55445	-3.5342	0.958479	2.01894	6.54778
1612.14	-0.927317	-2.05108	1.11252	4.75707	-4.62221	0.585096	-1.99318	-0.471521	1.41777	4.06736	4.25901
1613.75	-0.820967	-0.922423	3.46597	4.46965	-0.599283	1.04433	1.40723	0.0682198	2.72319	0.723808	3.15414
1615.36	0.866257	-3.06614	1.17855	2.70735	-0.154672	4.03583	-1.1252	0.317143	-2.58481	-1.70771	-4.97628
1616.97	3.89895	-2.76262	2.04347	-0.94615	-1.69619	4.11536	-3.63505	0.767244	-1.67058	-3.86007	-5.05145
1618.58	3.87456	-0.79835	1.10578	-1.35415	-2.24787	1.40685	-3.19897	4.61307	0.471832	-1.79505	-4.39687
1620.18	2.21622	-1.1325	-0.194285	-3.82291	-0.177601	-1.25465	1.67469	8.69293	5.43525	-0.204137	-1.92147
1621.79	3.38735	-2.09368	0.53246	-2.49097	-1.09995	-9.31689	2.97112	8.29172	7.78758	-0.145952	1.64378
1623.4	2.48313	-0.499391	0.784796	-1.54585	-2.73058	-11.4435	1.65558	3.43268	9.24355	6.26659	3.03862
1625	3.36157	-0.337968	1.91729	0.7555	1.79857	-11.5237	2.20211	5.56722	7.67454	6.34228	0.64369
1626.61	1.68057	-1.80772	2.12781	3.91556	1.38007	-6.76011	1.4269	-0.286255	5.28292	1.05282	-1.73465
1628.22	1.71753	0.413666	0.0202389	3.99625	-1.37321	0.544735	-1.95389	-5.21439	-2.16504	1.16351	-3.65727
1629.82	3.85445	-1.01213	0.23011	6.18931	0.722925	7.27312	-6.11583	-5.98094	-4.98693	-2.67523	-4.11905
1631.43	4.27565	3.86708	3.84935	9.83407	-1.04019	5.50955	-8.95946	-1.8201	-0.603117	2.65393	-6.58057
1633.03	4.71095	2.27881	-1.87625	11.3573	1.41369	11.1262	-3.19842	3.09869	-3.95817	3.69815	-9.01919
1634.64	5.77223	3.05548	-2.45472	11.1522	3.26457	6.73181	-1.69445	6.98621	0.783833	7.48459	-6.12375
1636.24	1.94028	5.20847	-2.27102	5.79362	9.14744	6.49132	-6.90002	7.31813	1.80365	10.0172	-1.38946
1637.85	-0.264949	6.65089	-4.14658	0.409176	7.24475	3.5403	-4.75779	6.57413	1.66068	7.14224	-0.063119
1639.45	-1.81242	2.36864	-10.5505	-2.84851	2.50591	-1.11352	-0.408569	7.5705	0.207106	5.39519	0.546865
1641.05	-2.22065	10.2084	-10.7931	-6.91885	1.26015	-4.2437	-0.535262	4.19773	0.924705	6.64821	3.33956
1642.66	-0.86101	6.9983	-8.83613	-4.54182	0.120161	3.06263	1.29981	3.00416	-1.47705	-1.03097	2.48473
1644.26	0.83614	9.20119	-1.55212	-2.25194	-1.49114	0.129537	2.12663	3.38682	0.586472	-6.30234	-1.43573
1645.86	0.45228	14.0138	-2.45078	-2.66426	-4.83835	8.75939	-0.700618	-5.32371	-8.6451	-10.4582	-0.952243
1647.46	1.62508	10.8261	-5.31688	-2.84268	3.46566	5.92526	-1.95655	0.278569	-7.20797	-2.63166	1.18012
1649.07	-0.256502	2.72108	-7.61843	-3.53413	7.33951	4.17798	0.944151	-5.08115	-6.78279	-1.92597	5.55252
1650.67	-4.70101	1.39741	-6.69922	0.479063	-3.41132	7.56841	3.17071	-8.4003	-4.04182	-0.0426328	-0.208348
1652.27	-4.49876	-1.75307	-2.35819	9.2122	-5.32916	1.44417	0.726865	3.62427	0.434323	2.78542	2.63745
1653.87	-7.17335	-1.7056	2.01465	9.65189	-0.339989	-3.57085	0.0324479	5.81589	5.75758	-5.548	10.1195
1655.47	-4.01622	5.02694	0.563203	10.1839	-3.81963	-3.46291	-3.98977	3.98223	5.07242	-10.9825	13.751
1657.07	0.908033	5.5495	6.43066	4.77282	-4.54571	-7.79548	-4.18944	1.61467	7.12733	-12.703	6.20932
1658.67	-1.86248	15.7936	11.5354	2.11548	-11.6393	-8.28675	-14.7335	-6.84184	0.0394495	-13.1464	3.8947
1660.27	-1.57274	7.50479	4.48804	0.861936	-9.85418	-3.03062	-19.7816	-4.38594	-9.92552	-10.7039	-4.02965
1661.87	-3.50842	-0.0319151	-5.48477	-5.23645	-0.487211	-3.86708	5.84521	-3.85298	-1.82323	-1.97714	-0.770712
1663.47	-4.17028	-1.19827	-6.52261	-0.918088	-0.483653	-2.02517	15.5809	6.64644	7.53584	-1.62835	-3.7808
1665.06	-9.26718	1.96428	-7.55016	4.82515	7.42917	-3.65175	17.1547	11.1212	7.39192	4.43563	0.974816
1666.66	-5.38587	-0.693533	-16.8798	-1.96676	15.401	1.47207	21.5781	6.90591	0.84021	-4.59619	5.2193
1668.26	-3.29154	5.25653	-20.0344	-7.93817	10.698	-0.258865	11.2723	-0.772874	-1.98374	-2.42279	-2.31244
1669.86	0.56402	3.38879	-19.8424	-7.45743	8.64286	-4.06959	11.1289	-4.07647	-4.51672	9.8989	-10.1735
1671.46	-3.75686	4.35812	-9.94676	-7.17208	7.09861	-3.18856	-1.33915	-5.86383	-5.99	11.2956	-9.00635
1673.05	-5.61231	-7.10136	-2.786	-8.49517	1.12914	-0.251964	-17.3149	-8.82775	-5.53245	4.85213	-11.1524
1674.65	-5.44101	5.07972	-7.98275	-14.7175	0.570364	6.01544	-1.02762	-12.3769	-6.07335	6.04207	-0.701017
1676.24	-6.32884	6.46069	-2.63149	-8.57479	-0.77913	0.321258	2.48623	-5.86873	5.45522	0.3117	5.92206
1677.84	0.0926176	16.7188	3.32386	4.59904	-6.15119	-2.97206	-2.20472	-7.76842	-1.92567	2.36524	7.12624
1679.44	9.59555	14.032	3.07202	14.7608	1.34746	-3.98855	2.23925	-1.00516	-4.23851	-1.92782	9.7717
1681.03	10.169	1.87477	0.95837	13.8351	8.15723	-4.42041	-1.15481	0.595381	1.39303	-8.89427	6.60119
1682.63	9.68758	4.65069	-6.55551	18.7109	19.8305	-4.44139	8.45222	7.49755	11.546	-2.5475	17.2876
1684.22	7.63997	1.11076	2.2949	16.2009	11.0056	-2.49484	-7.60256	9.02866	13.0291	-6.15262	6.10704
1685.81	5.58343	-4.87199	8.19704	6.79224	2.29895	-7.21379	-4.62502	-3.14149	14.5515	-22.5938	4.06643
1687.41	6.73471	5.80683	4.65661	0.637134	-8.05439	-4.84908	-0.490161	-22.5814	3.98304	-18.0573	0.36835
1689	2.58155	-4.03045	4.49734	-5.83077	-1.13954	-4.16864	-6.29519	-13.0008	-0.57573	-9.18274	-2.15433
1690.6	7.53013	5.51683	7.2313	5.55901	-15.0941	-11.565	-0.376703	-16.5168	-13.1959	-0.718124	4.30188
1692.19	6.90084	1.56876	8.27635	9.79242	-8.16069	-8.42596	-6.81028	0.546249	-14.208	-1.1643	4.03354
1693.78	4.17114	-14.1099	1.24499	5.17704	2.28621	4.86798	1.41449	3.22132	-1.7508	1.86431	12.7011
1695.37	2.22261	-8.8269	2.00332	5.31129	1.09395	4.63623	-5.5865	-2.4893	1.57325	1.35903	5.7303
1696.96	6.88606	-3.20195	6.53087	5.14197	-10.1734	-2.56041	-14.5903	-0.569192	4.12587	-0.035614	-6.58269
1698.56	4.27569	1.39228	9.59167	-7.65733	-14.359	-4.75156	-2.28709	-13.462	12.845	-7.82223	-0.232625
1700.15	-5.89934	4.27309	2.35364	-12.7752	-13.002	0.763601	-1.58246	-19.0666	11.1237	-0.547207	-3.45918
1701.74	-10.7195	1.09745	-5.27701	-15.7262	-1.22355	-0.848696	7.20375	-15.8206	4.07307	-2.50998	-2.77338
1703.33	-10.054	6.1713	-9.98731	-10.5461	-10.1747	-9.40922	13.0257	-14.0563	1.72563	5.85624	6.73548
1704.92	-14.3577	-0.212539	-13.2018	-2.69606	2.96527	1.4295	11.4662	-5.00596	-9.04566	12.9897	1.74841
1706.51	-12.119	-14.0699	-7.65314	0.801536	12.4513	3.12393	9.48549	5.55156	-2.63044	17.779	-0.286637
1708.1	-4.64417	-16.7309	-3.76518	9.46261	17.5055	-7.55717	10.74	14.644	-1.67507	20.7228	-10.8912
1709.69	2.74387	-4.61637	2.47309	8.03284	20.1053	4.2885	1.70023	26.853	1.06463	15.2106	-12.8906
1711.28	-4.23739	11.793	9.96424	7.07646	8.42759	0.507036	-13.627	16.4562	8.9983	9.34557	-15.2153
1712.87	-6.67987	10.6793	6.19167	5.66758	14.5024	3.50017	-8.47814	9.29035	4.34852	0.499892	-2.01056
1714.45	2.04511	16.5507	7.85942	12.9789	-0.558222	3.60361	3.47813	-2.20502	3.7917	-5.9175	5.15911
1716.04	10.4024	9.17523	6.10782	4.64851	-13.0011	3.41616	3.63645	1.70524	5.08056	-6.33368	12.5176
1717.63	7.81977	-1.88797	1.48902	2.11822	-4.81476	8.61624	19.6142	1.2661	-4.75129	-12.1875	10.7604
1719.22	7.16031	-15.0794	4.17463	5.12474	-4.33357	5.10769	0.169535	0.115188	3.89973	-6.7494	-15.1262
1720.8	-1.13222	-18.5059	-4.51885	-2.53478	7.43496	-7.76622	19.6736	0.475199	5.35684	-13.3663	-9.71014
1722.39	-3.61969	-15.0134	-2.50227	-3.18841	8.92192	16.9924	18.4458	0.590243	1.52641	-9.69404	-9.31954
1723.98	-16.0256	-4.5347	2.60628	6.61616	-7.58384	-1.92553	-15.4309	1.02692	6.35447	5.05483	-6.17652
1725.56	-13.4331	-24.406	4.77387	1.14478	2.25269	-1.64474	7.44811	0.949589	3.12362	14.3117	24.5498
1727.15	-5.07319	-7.71389	8.42137	7.8674	-3.5348	7.46376	4.88349	10.0481	6.37271	22.0651	18.1055
1728.73	12.8893	0.706101	20.1996	0.839946	-7.46693	11.0742	-6.63633	6.10796	-0.967727	17.6947	15.6754
1730.32	15.9813	-4.46806	14.6213	-7.59316	1.01376	8.10966	11.7034	23.7	6.18731	6.67731	20.5885
1731.9	20.1505	-14.289	-1.05645	8.71909	2.23969	19.2796	-13.211	30.0616	-3.80992	8.65745	-23.7886
1733.49	7.1323	-1.71983	-8.16963	-7.12122	16.1596	5.26597	-0.606967	14.935	-4.4794	-4.7555	-4.22866
1735.07	4.95487	3.78248	-17.8606	-10.6398	-7.86	10.5595	-0.777926	-10.0047	-15.1038	-2.5068	-11.4542
1736.65	-12.5446	-8.22217	-11.8834	2.4258	-15.9369	-3.43437	-5.99783	-6.20342	1.36678	15.035	-7.2045
1738.24	-8.65112	-12.668	-12.075	-5.56751	-9.97566	-0.792041	26.0577	-7.81982	5.02613	-2.79099	12.1867
1739.82	-11.7713	-15.2204	-13.43	0.37938	4.4607	-12.8861	29.4351	22.238	15.2322	-3.72943	9.7565
1741.4	-15.5952	-8.34557	-4.18158	0.44994	-3.89204	6.76216	10.6436	5.31511	-2.50416	3.09817	0.850321
1742.99	-3.7347	-20.1567	-7.08551	-11.4151	1.86426	10.8416	15.5537	10.7723	8.9539	0.640554	-4.61242
1744.57	-5.08182	-22.6885	-3.91303	2.80846	-0.677009	12.1608	-3.40675	21.3025	-3.00381	2.45446	-21.1644
1746.15	-13.993	-6.73751	5.47408	8.94271	13.8377	-1.73104	-15.8948	12.5416	-14.7009	23.9528	-17.7581
1747.73	-8.34084	-8.93523	0.380119	2.75961	-3.10913	-14.4434	-3.22079	-9.09475	-11.9373	3.84368	-12.8877
1749.31	-20.7451	1.40228	11.482	12.6647	6.04411	-7.88391	2.33011	-16.2314	2.15096	1.04672	-7.81778
1750.89	2.94124	7.48315	8.21762	-1.9546	1.01817	-6.93761	9.1502	-14.3786	-0.257057	-14.4555	9.93674
1752.47	12.834	12.5663	14.8903	-6.8986	-4.48866	-30.4687	-0.257292	-1.9785	1.67619	-9.63128	17.4776
1754.05	0.345545	2.23221	-0.940377	-7.96425	0.616063	-9.20087	13.0614	-9.93939	-9.96763	-14.1237	20.1271
1755.63	5.77469	3.88957	5.155	-8.44916	4.55574	-11.8846	-12.6454	-0.463789	-0.488534	-2.94003	3.38568
1757.21	-8.24872	6.12607	14.4426	4.06268	-0.66384	-10.9109	-4.92751	16.9484	5.47255	9.71627	12.004
1758.79	-16.8046	4.59704	29.7148	15.1979	5.11243	-14.979	-13.6448	17.3999	-6.15329	8.2019	1.81205
1760.37	-1.83446	4.52175	13.4786	-4.21168	9.79885	-9.20454	3.12667	0.811814	2.28295	-4.29352	-3.50458
1761.95	-15.592	23.9142	6.64486	-2.96241	12.1071	4.68319	1.4518	-20.5865	1.36992	4.77544	-23.2215
1763.53	-3.29772	7.73044	-3.71072	4.15137	5.48918	11.948	3.91997	-17.262	-18.0844	1.25437	-33.6791
1765.1	-4.10928	13.4749	-6.09549	-2.62272	-8.73259	-5.44628	7.93941	-10.5004	-14.1556	-1.79161	-15.7166
1766.68	-11.2043	2.41463	-15.7856	5.96431	1.87784	13.4789	16.625	-1.41942	-16.5826	13.9038	-4.66575
1768.26	-3.29485	19.1897	8.36443	-2.89011	4.21966	-16.0627	-8.32983	-4.35127	8.96658	16.1177	4.78273
1769.84	-14.6645	14.2533	3.22122	3.54353	-1.93586	-8.37771	17.1538	1.2009	11.4826	20.4189	20.3064
1771.41	-0.278971	-1.01829	19.0286	-0.688603	1.0059	10.0735	5.03686	7.69697	2.83198	-1.27152	12.505
1772.99	6.69955	4.27223	18.6316	-12.4396	-0.600093	15.5872	-0.41102	-6.42068	6.39119	2.61804	5.41487
1774.56	0.704966	1.13802	12.3198	-10.1566	-7.08289	8.8866	10.7152	-17.3856	5.79243	-1.72195	0.999029
1776.14	-7.18597	0.940171	7.83514	4.00109	0.3929	17.5959	0.741542	-18.6333	-20.7674	-8.02116	-11.6281
1777.71	-6.63589	2.31844	12.4219	-10.7964	-2.34822	3.38809	-10.3787	-10.091	-0.824506	-1.95402	-5.06898
1779.29	-13.8003	12.7608	2.6191	-2.7879	-8.13501	2.65179	-15.2861	-5.87369	-0.817406	11.35	-7.9645
1780.87	-4.59104	3.00882	11.3202	-8.22477	-11.0988	-16.655	-16.6366	-0.37459	10.8954	-10.1234	3.73992
1782.44	1.24778	-1.34712	-10.3864	3.64975	-0.959027	2.80663	-16.6858	13.1209	-4.10124	0.172212	-20.146
1784.01	10.8215	-8.27843	-6.66176	5.96195	-1.84459	22.297	-12.9076	25.2412	-6.93117	-9.13412	-14.949
1785.59	8.33026	1.79712	-5.43421	7.34565	-3.04574	28.3787	-12.3584	15.6982	-12.6929	18.0817	-16.4783
1787.16	3.28435	0.835244	-9.58439	-4.21325	-11.8341	11.005	12.0067	5.15184	-2.32227	-10.9727	4.6723
1788.73	-3.10579	2.5746	1.66957	6.91188	4.73134	17.6969	-3.45745	9.35771	-12.7644	-11.8267	5.10706
1790.3	-5.8632	1.60599	1.54426	-4.50346	-3.28892	9.05976	-10.9212	2.57795	3.55347	1.36061	12.0418
1791.88	-16.2792	2.16909	-14.7149	-10.1201	-11.9522	-5.16472	-2.49869	-3.18283	0.91517	-5.57894	7.71173
1793.45	-4.71731	-8.21179	-8.2158	-17.2984	-4.4823	-5.64448	-11.0805	-0.885655	-2.07196	-12.0271	4.67017
1795.02	4.20812	-8.22974	-13.2439	-6.48337	5.77295	-4.87116	0.705418	6.23106	-3.75449	-6.09677	-1.81591
1796.59	2.77553	-20.5889	-15.5318	-7.62858	-2.71135	-1.35997	10.6647	5.7397	-2.36499	-5.29441	-5.16696
1798.16	2.87269	-9.37502	-10.2415	-9.27808	1.08364	15.8195	2.20965	-0.967527	-10.6576	14.4768	-7.76522
1799.73	-5.04402	-4.5274	-9.2267	-20.0313	-8.00193	9.44111	-1.44991	-11.0512	-4.22083	-11.7596	10.4534
1801.3	-4.636	-3.72713	-6.62409	-4.07624	0.399337	-2.89918	-14.0181	0.445683	-8.11465	-15.8717	29.5295
1802.88	-3.45084	-1.8695	-8.46582	0.726519	-9.81859	-3.95823	-9.94465	-9.06664	-3.76441	3.96378	15.9768
1804.44	-1.77693	-15.9299	-9.87671	2.2592	-5.78629	13.0159	-11.9549	-3.59036	-20.8014	-15.8119	-9.08846
1806.01	-3.6156	0.999888	-2.16979	-6.85204	-14.9376	5.97309	-21.8032	-20.6585	-15.9486	-12.3179	-26.8823
1807.58	2.03581	-5.409	4.38292	-2.67873	-2.17376	-12.0263	3.58091	-5.0125	7.69	-12.4349	-7.47099
1809.15	4.32926	-6.65146	4.42992	5.6319	10.5777	-5.71378	7.94458	-4.9499	1.57173	5.10156	-13.2251
1810.72	12.679	-1.09653	8.67882	-6.75869	13.5979	5.4308	4.54705	0.840644	4.29098	0.974562	8.57484
1812.29	4.88999	7.51735	2.10545	-0.679141	18.445	4.46297	4.89031	12.9159	-0.308314	7.51736	16.9137
1813.86	10.516	4.53165	1.12184	0.853336	15.9018	-6.39583	1.76153	12.8099	8.47944	5.89716	27.0363
1815.42	0.335927	-6.24735	-7.47561	-0.486221	16.0892	-4.83611	24.1397	1.507	17.7987	13.845	22.2124
1816.99	1.68093	-14.337	-4.0254	4.65194	2.90155	3.48689	-4.18931	-4.61421	9.63762	-0.577675	7.39678
1818.56	-1.63931	2.10756	-1.53284	5.58978	-3.52406	-17.5437	-20.9764	-18.9987	15.3559	-1.38788	-0.686449
1820.12	-2.88961	6.51516	6.78139	13.5746	-8.02547	-20.0623	8.59281	-3.69682	22.5751	-32.9653	9.08219
1821.69	4.2124	16.7092	6.31539	22.7343	-14.9111	-9.88312	-7.67034	-12.6461	-15.7489	-7.44691	-23.8096
1823.26	11.4706	16.3611	10.9732	-4.82098	-0.760716	-5.52952	-3.59839	-0.0709228	-9.77506	-7.22141	-4.24293
1824.82	-2.01473	7.23027	-3.65729	-12.0828	1.83864	-6.28773	-1.82024	-7.6796	-10.1118	-0.555675	5.30136
1826.39	4.16724	-13.4452	2.71957	-12.8168	-5.9632	5.12547	3.06246	-26.5753	-7.39147	15.3619	-15.998
1827.95	7.34253	-25.6937	3.99854	-9.86511	-9.64501	-7.23676	-2.65697	-8.21439	1.39087	5.50352	-21.4113
1829.52	-2.21567	-14.6941	3.00663	4.85674	-9.87687	-2.2681	-19.5074	-5.27782	-5.02123	5.47829	-26.1324
1831.08	-5.77137	-10.2518	-9.61045	9.96607	-13.8659	-10.0307	4.48613	-12.8855	-7.69321	4.30769	-1.41079
1832.64	-1.5664	-3.76255	10.277	14.7496	-22.1546	-7.40452	10.226	-0.820621	-9.37274	-9.71859	-1.10748
1834.21	2.61298	-1.20547	10.3271	16.9481	-25.8702	-4.83034	-1.2015	-8.4131	-15.4211	3.07789	-2.89872
1835.77	1.11887	8.31456	7.46989	9.60988	-6.04866	3.24009	10.1307	-14.2108	-7.81194	4.44849	11.6121
1837.33	10.7542	3.56458	-12.742	-5.75596	1.61562	5.39839	23.3251	-12.8659	-6.89563	6.92156	31.4034
1838.9	13.1173	-2.03199	4.55793	3.01544	-6.08649	10.0198	5.33158	-3.64718	-7.97441	7.73795	7.16042
1840.46	10.0444	3.17527	5.24242	2.30119	0.504424	-4.55928	-22.1495	13.456	-5.52244	-6.58228	-2.37695
1842.02	-2.47621	18.4412	-1.28274	-1.61519	0.557517	8.91772	-11.3157	-1.75548	-3.08744	-0.502254	-4.09371
1843.58	5.49911	-2.2775	-6.8134	-0.576038	-0.130774	-2.42004	10.139	3.50245	-1.77049	11.3752	-19.7757
1845.14	8.99337	1.91374	12.6866	9.29781	11.3427	-6.32083	-7.1587	23.6305	0.339372	3.77697	-21.9143
1846.71	6.28317	-5.21085	7.3674	10.374	-1.64263	-0.172767	-9.07349	11.3915	1.94233	-3.50777	-13.122
1848.27	11.8993	1.95207	1.14809	6.63161	-11.2834	-7.56848	3.22627	1.892	4.13833	-8.91814	-0.104247
1849.83	20.3322	5.80086	-9.31652	6.56873	-14.7384	-14.8362	10.8852	10.1596	1.96936	-10.6924	-2.51709
1851.38	-0.82193	-1.32344	-6.43806	8.29416	-12.8801	-15.5272	-1.38241	12.0438	4.2616	-0.630408	-8.50222
1852.95	-2.67168	-5.04358	-13.1563	2.47934	-6.71568	-2.6499	8.01214	4.64554	-5.17222	-5.02224	2.3755
1854.51	-3.0363	9.09448	-4.33253	-2.36725	-4.27621	-4.27785	-4.16715	-4.10494	-5.92226	-2.3614	6.33928
1856.06	5.00619	-2.36345	-2.37457	-0.554623	-2.67369	-6.732	-8.87553	5.18593	2.45817	8.80234	-15.4801
1857.62	-11.4275	6.3598	-2.10245	-8.49472	1.86525	-5.9504	-5.33054	0.175213	11.8717	7.01631	-10.673
1859.18	-14.5281	-8.26561	-2.45316	-11.2291	-5.82319	-5.43671	2.60049	4.39609	13.702	-11.1398	-1.38491
1860.74	-4.6128	-1.29316	-8.81673	-2.27136	-18.1328	-8.19459	8.01053	6.50488	10.5544	-9.17963	7.80657
1862.3	3.00287	8.41746	-6.13598	-6.90287	-19.0914	2.28126	9.34303	-4.28644	7.00918	-20.6015	-6.19345
1863.86	4.49693	-8.53874	-13.0249	-4.86122	-3.224	23.5382	4.85299	3.03081	3.25616	3.35983	-8.92073
1865.41	14.7137	3.724	-8.06326	-2.51291	-11.9273	9.29199	-3.16954	-2.52894	-5.57793	-11.4789	3.54847
1866.97	-2.33315	25.2101	0.785408	-2.9503	-14.6034	-2.98576	-21.3318	-12.3028	-6.74881	-10.483	18.4244
1868.53	1.30013	11.2033	-0.68322	-2.20426	-13.126	1.2924	-24.9892	-3.62234	-0.669444	8.83004	0.549269
1870.08	-5.5677	3.44589	-8.40585	-12.0745	-4.58503	-5.19903	2.97779	-7.30097	5.84285	7.27319	10.9806
1871.64	-3.86265	-13.8758	-2.56532	-2.70016	-6.2325	-10.457	11.1142	-2.79407	14.2536	9.95932	7.06355
1873.19	1.12624	-7.27446	-3.92766	-4.71988	-12.5621	-3.45729	7.46328	-6.52085	5.26156	6.15223	4.67386
1874.75	0.685504	-5.72568	-2.81444	-7.16774	-0.291251	-5.10559	0.114855	-5.97466	1.73188	-11.0861	-4.02283
1876.3	9.49383	-10.5542	-4.94702	16.0625	15.8366	-8.02272	10.2216	23.4175	4.78141	0.702486	-1.73214
1877.86	0.483039	5.03729	-1.21169	27.2206	1.80242	-3.071	3.18944	18.9493	-2.95085	-8.00404	-3.36805
1879.41	-2.03472	4.46806	2.42369	24.6903	5.92348	10.9799	-7.49913	12.0312	-8.4867	0.842146	-3.26499
1880.97	0.172605	0.219403	0.143042	17.6366	10.3662	10.7557	-7.69887	6.46274	-8.66634	8.94632	-7.97636
1882.52	-4.32219	-2.9076	-5.47751	6.04306	0.57636	0.335108	13.8012	-12.3476	-2.50895	-3.5958	5.44992
1884.07	-6.13691	-16.2666	-2.84498	4.7426	4.34299	3.26526	17.1999	-14.0559	5.37885	-4.26091	-2.79429
1885.63	-0.496245	-1.09318	-0.805878	-1.86851	1.39147	2.23269	3.56514	-10.0389	-3.20536	-7.9013	-6.72384
1887.18	-2.6251	-3.02848	-6.57865	-1.44239	3.2909	0.214423	-4.24582	5.98501	-3.15559	-3.57703	-3.12996
1888.73	-1.66787	-0.928171	0.666863	-1.73411	-1.04312	-1.22044	-7.75333	14.6755	0.291243	0.708725	-2.38779
1890.28	-4.40697	-4.83314	0.375053	0.430025	5.74372	10.9678	-5.5234	18.2489	-5.83963	-0.0179227	-4.61233
1891.84	3.38317	-15.0394	1.39034	-2.65969	9.50297	6.07076	-5.2048	18.6415	-2.01697	3.58896	-7.33353
1893.39	-0.0367172	-9.28091	-4.01326	-2.01659	5.60704	0.622472	5.22829	3.06546	-2.99117	2.46615	-7.33693
1894.94	-6.64377	-5.67078	-2.02362	-3.62941	-4.85174	-9.40067	6.43342	-13.7153	2.5814	-1.14261	-3.80154
1896.49	-6.18241	-4.96267	-0.170376	-6.76143	-1.57769	-4.07527	4.11606	-19.8149	6.54861	-0.612497	-5.32511
1898.04	-1.70907	-0.489316	2.4322	-3.96625	-3.36064	-5.5214	8.93206	-14.6125	6.14653	7.81479	-7.35227
1899.59	-3.67989	-8.40334	-1.25065	1.38967	6.4952	8.4755	10.7835	-4.66856	2.89733	2.46957	1.50223
1901.14	2.09918	-5.95186	6.2227	0.577326	-1.15701	10.9966	3.20932	-9.37455	-0.965046	-4.53219	-3.55627
1902.69	2.0952	-9.98485	1.75257	-0.090954	7.97886	16.4343	7.31686	1.96061	-4.65136	-4.18475	-0.0195234
1904.24	-1.18069	-12.4932	-2.18271	-2.56753	6.36371	5.5141	4.55126	7.52933	-0.738841	-4.43418	4.6116
1905.79	-6.24462	-12.9933	-8.27167	-0.66718	5.14027	-1.53848	3.67734	3.20309	-5.29496	-7.84275	-0.0706926
1907.34	-3.59854	-11.2163	-4.72727	7.90654	-4.44856	-10.1876	-5.56985	4.84379	-3.25491	-8.57216	-2.82917
1908.88	0.517583	-1.76148	0.508224	-1.46189	-9.49562	-7.30545	-4.87322	-2.57431	-0.263173	-8.20035	-0.289816
1910.43	-2.64882	-2.23386	1.24203	-3.78993	-5.15828	-16.842	4.63504	-0.703136	6.80852	-8.72263	3.15453
1911.98	1.48961	3.56826	0.672202	-0.505752	3.51825	-5.22311	-0.267348	1.36784	2.58659	-13.3523	7.36207
1913.53	7.05643	4.13332	4.22843	-2.81063	1.44389	0.542367	3.42246	-2.13638	-1.01756	-13.3159	3.22986
1915.07	9.80169	1.93913	5.24354	0.0611875	1.62624	2.17987	8.92109	2.30508	-0.388762	-11.6461	3.01678
1916.62	-0.703835	5.7757	6.25915	4.26829	-1.09047	-6.11694	14.8716	6.97588	4.39715	-3.18125	9.80039
1918.17	-3.50976	-6.69341	-0.260751	8.27099	3.45705	-5.69938	21.3337	9.03747	5.22861	0.942189	2.99703
1919.71	0.0523524	-1.32407	1.33799	19.3377	2.75281	-3.57385	17.8941	13.1764	4.12457	6.23169	2.92026
1921.26	1.67845	7.69289	8.51528	9.29412	-2.56878	-0.560389	10.7923	2.54399	8.78299	6.45367	0.245125
1922.8	-3.40987	8.4297	2.83611	4.99505	0.159874	0.735726	6.00385	-1.32114	8.85309	3.17498	-2.59653
1924.35	-3.24571	11.7914	5.54403	-0.783113	-1.51752	-0.142011	-5.92673	-4.59924	7.67113	1.69757	-3.73285
1925.89	0.746671	9.2951	6.11994	-1.06397	6.46074	1.56939	-10.6549	0.952037	1.21604	-2.35583	-6.64147
1927.44	2.6202	5.32839	5.27545	1.6489	-1.51475	-0.788319	-12.218	-8.64564	-3.83339	-7.37241	-11.7873
1928.98	-2.52487	1.71498	0.760931	1.68806	6.82219	-2.44538	-5.52696	0.0856357	-5.51251	-5.74245	-0.475454
1930.53	0.78238	-6.77767	-0.763048	5.3213	10.8463	-3.28478	-0.689368	4.74762	-4.71609	-0.367237	-1.84871
1932.07	4.77943	-6.66716	5.05173	4.10534	8.67093	-9.93149	1.81968	8.24674	1.97706	-5.60924	7.28013
1933.62	6.84648	-2.75825	5.3484	4.23377	3.88693	-3.67879	3.14374	2.19789	3.29889	2.43418	1.90355
1935.16	6.80997	-2.76798	4.52392	3.18955	2.27753	-0.267472	2.12924	-4.84888	5.15882	1.69471	-0.0369057
1936.7	6.99537	-0.0785841	6.52428	5.72151	1.05285	-0.286221	1.54067	-4.71314	1.79722	11.1004	-2.86056
1938.24	11.8041	-0.747328	4.02821	13.2678	4.38887	3.80532	-2.87385	5.63486	-1.05721	14.1785	-6.02392
1939.79	0.167414	0.54049	-3.36075	4.56535	-2.57248	5.35827	-3.84072	-2.36848	-2.79761	2.86322	-0.426363
1941.33	-2.98831	6.28941	-9.11091	-0.92078	-1.95081	12.4824	-2.72245	-0.926092	-9.30634	2.20421	2.60375
1942.87	-3.8566	5.67075	-5.15011	1.22522	-0.760864	1.43222	0.959614	-1.32895	-4.89285	4.20069	-1.80012
1944.41	-1.91062	4.5549	-1.80589	-3.25905	-4.25796	-2.86444	6.98897	-2.08334	-0.2425	-0.0972114	1.74638
1945.95	0.251685	8.57311	1.01424	-0.0871994	-7.66329	4.50264	3.81096	-1.35365	-2.57879	8.11001	-3.61731
1947.49	0.116401	4.43004	2.68206	5.68555	1.52787	0.432406	10.3569	6.99058	3.1821	7.26971	-0.524078
1949.03	1.56321	-1.91511	0.502362	8.50711	3.92193	11.1113	4.11334	8.09869	-5.64212	9.59362	-11.3081
1950.57	3.7586	-4.61424	4.89755	1.66548	3.84191	5.60344	-1.78774	9.70984	5.57136	6.30897	-5.7254
1952.11	0.468087	-6.92	-0.631832	-12.3508	8.84815	7.30063	1.37723	6.47227	7.49941	-4.20228	3.37501
1953.65	2.25889	-4.58365	-2.79433	-11.6854	7.25478	6.92867	5.53399	4.11343	1.13993	-8.2106	9.11311
1955.19	1.76842	1.60387	3.29566	-15.4857	7.78848	-6.66563	5.96444	-3.42598	12.5387	-13.6889	15.4863
1956.73	1.16783	3.18685	4.11765	-6.55749	7.22432	-4.54622	5.07463	6.3227	8.06873	-8.18539	14.1487
1958.26	0.746961	6.91153	6.13136	0.235119	-1.78107	5.88606	-2.15446	5.70729	2.09758	4.04818	5.4411
1959.8	0.115753	1.09757	5.92133	10.0051	3.51351	-4.44223	8.2672	10.2253	3.81677	2.82593	10.406
1961.34	0.761787	-5.87919	5.92571	8.48846	-0.368926	8.3396	-1.76492	4.295	1.12182	5.0573	-0.334396
1962.88	4.23516	-5.92802	6.18513	-1.41249	-5.68319	5.31375	-6.13975	2.49977	1.62789	5.58339	4.68515
1964.41	7.93331	-10.5456	1.18519	-5.19404	1.61966	0.198669	0.862206	1.63068	1.94094	6.06326	8.24023
1965.95	3.94492	-5.16943	-2.03286	-2.71747	-5.46358	-6.45173	-1.95528	-7.68451	-7.30747	1.18084	8.06534
1967.49	-3.39751	-1.41042	-4.05763	-9.66071	-4.25014	-4.53401	-3.21296	-15.2071	-7.21489	0.469303	3.11348
1969.02	-3.65182	-5.74295	-8.33544	-7.72484	7.11881	-5.56635	-5.66356	-5.63765	-5.58314	2.58285	-7.96313
1970.56	-3.73779	3.00418	-3.72564	-0.907139	-2.26131	-1.47462	-6.09629	-14.6847	-8.25243	1.02657	-8.6431
1972.09	3.0211	3.29609	-0.945325	1.54041	-5.65356	1.64484	-2.94898	-16.9231	-3.03791	-11.2003	-3.87017
1973.63	3.74767	1.15496	-1.32383	0.461887	-2.76413	12.7909	-2.93153	-14.6763	-1.18339	-6.20753	-4.33313
1975.16	2.61605	2.88989	0.911467	-5.68265	0.604657	8.95374	-4.90742	-10.4696	3.16184	3.36468	-6.26891
1976.7	-1.92231	3.38185	-3.9351	-2.22279	0.000344951	6.62793	-3.1371	-4.93827	-0.337786	1.70142	0.749879
1978.23	-6.42583	3.21576	-1.76638	2.6198	-0.874166	8.59316	-2.46557	-1.46471	-4.09843	7.94182	-3.18312
1979.77	-3.26054	0.507246	-0.343003	-0.280921	3.42202	9.75448	1.5969	8.31859	-6.59372	1.50759	-1.32712
1981.3	-1.08268	-1.84283	-3.6059	-1.28975	5.4823	6.45989	5.2643	9.53216	-5.22702	4.63155	-4.37614
1982.83	1.87502	3.70813	-2.72081	-4.13578	1.37202	-0.00218928	-0.944422	5.03743	-2.15015	0.611877	2.11584
1984.37	8.46742	2.96885	-4.23651	-4.38656	2.2567	-4.63339	-3.01812	8.70255	1.14188	-3.31614	4.46243
1985.9	5.56143	6.41993	-2.14242	-9.54672	-3.28492	-7.60294	-2.4085	-1.60252	-0.317684	-6.99104	7.49182
1987.43	5.99084	4.7045	-3.36525	-12.3017	1.08365	-8.06484	-7.64499	-3.79254	0.733092	-1.59475	4.75208
1988.96	-2.28572	4.44318	-2.59752	-10.2582	-1.18111	-6.01188	-6.85171	-7.1927	0.246255	-1.01891	3.51319
1990.5	-4.58418	5.98395	3.70737	-9.66458	1.76331	-3.47986	-7.27269	-10.6918	4.71307	0.450465	6.75371
1992.03	1.56712	7.9322	11.5874	-2.83	-2.91039	0.393227	-8.35682	-8.62115	0.845834	0.954821	3.40956
1993.56	-5.38601	1.80482	7.67355	-0.0088232	-0.108581	14.3465	-9.59993	-3.79682	-4.03674	3.20077	-6.18787
1995.09	-2.62179	-5.04111	-0.499526	-4.44548	9.29386	15.9552	-6.79245	4.15279	1.6753	9.09023	-4.73843
1996.62	-0.360354	-3.1085	0.543861	-1.51651	7.83393	6.91759	-0.371189	3.4202	3.79748	8.89607	0.544983
1998.15	-2.37066	1.45772	1.29534	-0.960586	-3.89797	4.81829	-0.399931	-8.75244	2.26685	6.23035	2.75152
1999.68	-1.42059	-4.36715	-2.27957	4.20946	-1.69008	6.67313	0.278561	-6.21457	1.70097	10.9588	0.399534
2001.21	0.74939	-6.35664	-4.0112	6.30545	-6.14276	0.153244	-0.884528	0.753281	8.59589	18.5548	-2.28528
