# Supplementary material for: A new non-destructive method to decipher the origin of organic matter in fossils using Raman spectroscopy
Source: Royal Society of Chemistry journal article supplement (doi:10.1039/d4ra04364b), 2024-01-01
Supplement: d4ra04364b7.xlsx [file d4ra04364b7.xlsx]

## Sheet: Sheet1
Dataset S5 - Raman parameters extracted from the deconvolution of the D and G bands. D- and G frequency (i.e., the wavenumber defining the centre of a peak), D-FWHM (full width at half maximum height), G-FWHM, R1(ID/IG; I denotes intensity of the peak), Aratio (areaD/areaG), RBS (Raman Band Separation: Dfrequency-Gfrequency), wD/wG (where w denotes FWHM), D2-FWHM (D2-full width at half maximum he…
status	sample	D frequency	G frequency	D-FWHM	G-FWHM	R1	Aratio	RBS	wD/wG	D2-FWHM	D4-FWHM	D6-FWHM
Matured (250℃, 24h)	black feather	1360	1578	100.74	141.17	0.276923	0.197455	218	0.713608	63.0237	78.81	NA
Matured (250℃, 24h)	black feather	1361	1560	106.58	94.81	1	1.12243	199	1.12414	72.4881	124.356	NA
Matured (250℃, 24h)	black feather	1363	1605	138.68	88.61	1.14516	1.78886	242	1.56506	138.639	110.72	NA
Matured (250℃, 24h)	white feather	1357	1550	100.04	89.45	0.6	0.677686	193	1.11839	79.6155	84.1372	337.545
Matured (250℃, 24h)	white feather	1357	1555	103.01	96.52	0.55102	0.580298	198	1.06724	76.4086	79.9324	315.827
Matured (250℃, 24h)	white feather	1364	1564	62.63	151.13	0.133333	0.0549119	200	0.414411	63.0237	NA	106.392
Matured (250℃, 24h)	shrimp cuticle	1373	1606	240.08	87.06	0.860759	2.38084	233	2.75764	110.752	NA	52.9085
Matured (250℃, 24h)	shrimp cuticle	1376	1607	147.98	85.08	0.74026	1.29497	231	1.7393	111.993	99.28	84.6289
Matured (250℃, 24h)	shrimp cuticle	1363	1566	112.92	91.27	1.05714	1.3233	203	1.23721	66.2696	105.92	249.547
Matured (250℃, 24h)	cyanobacterial film	1373	1615	141.53	61.98	0.85	3.83	242	0.44	14.55	79.33	142.33
Matured (250℃, 24h)	cyanobacterial film	1380	1606	92.85	88.58	0.86	0.38	226	0.95	NA	NA	67.74
Matured (250℃, 24h)	cyanobacterial film	1388	1605	210.17	89.61	0.86	1.57	218	0.43	NA	49.58	89.58
Matured (250℃, 24h)	algal film	1368.43	1611.5	85.5147	72.5608	0.5	0.590521	243.065	1.17852	NA	NA	169.93
Matured (250℃, 24h)	algal film	1378.51	1605.86	214.633	79.8628	0.84	2.26562	227.35	2.68752	NA	NA	53.7
Matured (250℃, 24h)	algal film	1365.69	1609.11	102.837	78.2879	0.639344	0.843137	243.419	1.31357	NA	NA	80.13
Matured (250℃, 24h)	insect cuticle (red)	1376.3	1586.51	221.846	124.513	0.75	1.29915	210.213	1.78171	46.8	52.83	83.88
Matured (250℃, 24h)	insect cuticle (red)	1376.87	1614.1	75.9079	74.3898	0.220588	0.226544	237.234	1.02041	NA	NA	90.29
Matured (250℃, 24h)	insect cuticle (red)	1365.67	1587.63	96.0373	123.294	0.338462	0.270588	221.964	0.77893	51.39	105.88	NA
Matured (250℃, 24h)	insect cuticle (black)	1372.52	1576.47	70.8431	144.893	0.111111	0.0585612	203.944	0.488935	55.61	NA	NA
Matured (250℃, 24h)	insect cuticle (black)	1373.93	1585.01	215.369	127.497	0.202899	1.2605	211.073	1.68921	50.16	52.78	84.29
Matured (250℃, 24h)	insect cuticle (black)	1374.76	1612.97	74.2045	75.3185	0.202899	0.2	238.206	0.98521	NA	NA	NA
