# Supplementary material for: A new non-destructive method to decipher the origin of organic matter in fossils using Raman spectroscopy
Source: Royal Society of Chemistry journal article supplement (doi:10.1039/d4ra04364b), 2024-01-01
Supplement: d4ra04364b8.xlsx [file d4ra04364b8.xlsx]

## Sheet: Sheet1
Dataset S6 - LDA loadings for the chemospace shown in Fig. 3. D- and G frequency (i.e., the wavenumber defining the centre of a peak), D-FWHM (full width at half maximum height), G-FWHM, R1(ID/IG; I denotes intensity of the peak), Aratio (areaD/areaG), RBS (Raman Band Separation: Dfrequency-Gfrequency), wD/wG (where w denotes FWHM), D2-FWHM (D2-full width at half maximum height), D4-FWHM (D4-full…
Raman parameter	LD1	LD2	LD3	LD4
D frequency	6.7522	0.97872	-1.1764	3.4275
G frequency	-6.4678	-1.2108	1.2669	-3.5618
D-FWHM	0.022206	-0.0039573	-0.015798	-0.056677
G-FWHM	0.031621	-0.013087	-0.011262	-0.016985
R1	16.879	5.0634	-0.074514	2.0358
Aratio	-4.7044	0.04456	1.6133	1.004
RBS	6.8209	1.2087	-1.3449	3.5276
wD/wG	2.712	-0.71794	-2.6432	3.5078
D2-FWHM	-0.24911	0.013722	0.042533	-0.010054
D4-FWHM	0.008657	-0.029817	-0.045949	-0.12543
D6-FWHM	0.0040603	-0.019812	-0.0021437	-0.010635
