# Supplementary material for: A new non-destructive method to decipher the origin of organic matter in fossils using Raman spectroscopy
Source: Royal Society of Chemistry journal article supplement (doi:10.1039/d4ra04364b), 2024-01-01
Supplement: d4ra04364b9.xlsx [file d4ra04364b9.xlsx]

## Sheet: Sheet1
Dataset S7 - Summary of the results of the ANOVA-type statistical analyses. The Kruskal-Wallis test was used for datasets where the assumption of normality was not met.
The Welch ANOVA test was used when the assumptions of both normality and equality of variance were not met. Bold font represents p-values < 0.05 (i.e., statistically significant values).
Extant dataset (i.e., untreated and experimentally matured samples)									Fossil dataset
	Raman parameter	ANOVA-type test	p-value							Raman parameter	ANOVA-type test	p-value
	Aratio	Welch	0.36							Aratio	Welch	0.47
	D frequency	Kruskal-Wallis	0.03							D frequency	Kruskal-Wallis	0.14
	D FWHM	Welch	0.6							D FWHM	Welch	0.6
	G FWHM	Kruskal-Wallis	0.2							G FWHM	Welch	0.01
	G frequency	Welch	0.002							G frequency	Welch	0.2
	R1	Welch	0.0001							R1	Kruskal-Wallis	0.04
	RBS	Welch	0.01							RBS	Welch	0.04
	wD/wG	Welch	0.35							wD/wG	Welch	0.63
