# Supplementary material for: A new non-destructive method to decipher the origin of organic matter in fossils using Raman spectroscopy
Source: Royal Society of Chemistry journal article supplement (doi:10.1039/d4ra04364b), 2024-01-01
Supplement: d4ra04364b10.xlsx [file d4ra04364b10.xlsx]

## Sheet: DataS8
Dataset S8 - Loadings for the LDA chemospace of untreated, matured and fossil samples shown in Fig. S10.
wavenumber	LD1	LD2	LD3	LD4	LD5	LD6	LD7	LD8	LD9	LD10	LD11	LD12	LD13	LD14	LD15	LD16	LD17	LD18	LD19	LD20	LD21	LD22
900.314	-64.0447	18.8688	-10.9379	-45.2939	-4.97595	41.9136	-11.0121	-44.2304	-27.1641	78.6634	10.8971	-27.0166	43.8475	-16.7409	21.0969	-8.23007	1.38866	31.5827	-3.02028	-20.6673	-5.23804	30.0849
902.072	-171.392	-35.6321	-2.76902	-6.33396	-39.0329	26.2337	-7.76537	-20.1575	1.53361	76.2882	27.2076	-38.9647	63.2025	-36.2149	45.9532	-2.22474	-15.9348	47.269	-2.84861	-15.403	-29.5781	-7.20356
903.832	-99.1885	9.13929	-23.2325	24.9284	70.8934	4.62214	32.6786	-79.0225	67.6849	59.5644	-7.9732	-81.0761	-60.5151	-30.8033	-8.89096	8.69818	-29.5382	43.7509	29.8555	18.5488	-27.0276	-3.6987
905.59	-26.0713	19.9625	46.9375	-8.90746	41.1494	-29.2856	-35.2627	22.8398	40.1672	-121.07	2.7782	-20.6394	-14.0228	26.239	11.4927	-23.3695	-28.3834	2.1717	68.189	55.7616	-28.6897	-53.2683
907.35	80.1168	-40.6961	-30.2799	-50.0882	72.8233	-59.7127	-32.2367	33.2911	29.0668	-161.989	6.7358	-19.773	-14.5507	-24.7473	13.1156	-27.9888	11.9296	-31.2472	49.155	36.0415	-8.22943	-9.69331
909.107	85.865	68.0735	9.67174	-27.3763	118.704	2.92734	-21.466	-19.5156	31.4102	-128.736	-48.5893	-10.9974	-50.4236	-15.6652	31.5889	-8.44496	0.738664	-45.9901	12.9871	18.8645	2.20125	1.34966
910.863	70.3608	33.3024	-8.94755	28.1133	89.5611	2.95795	19.3377	61.8779	-5.25167	-84.9957	-16.8346	5.59853	-22.9164	5.7209	39.1679	8.22944	-7.65113	-32.6178	-25.8121	6.61109	2.39291	-50.5686
912.621	208.635	117.94	14.6959	-14.8238	2.60802	64.5572	-33.4132	35.892	-9.25843	-26.3008	18.7829	71.5707	45.7037	12.8149	43.3454	31.678	-67.8394	-55.6564	25.1246	6.35565	-3.66682	-15.8174
914.377	142.658	65.9025	26.0929	-6.83435	3.35663	84.7447	-43.9104	15.5118	-9.31776	41.58	46.1648	35.6306	82.937	-23.5036	36.2544	0.00975536	-9.12513	-13.7645	22.2321	14.1328	14.1812	4.68102
916.135	-25.8232	-130.19	-17.6051	-19.6978	-24.6227	-44.1949	-26.0961	78.1272	-25.6648	-0.330405	68.373	30.7516	54.0252	-52.906	24.0258	-7.0369	14.4496	3.77627	16.2383	1.82202	-8.25731	-6.38388
917.891	-65.1667	-3.98672	-27.9123	22.8515	18.709	-15.9532	16.9791	-17.6838	-0.0883255	45.2695	5.46641	-24.5629	-62.1938	-6.90115	-39.3266	15.8167	2.77028	23.1382	8.86215	14.7134	7.9252	5.8098
919.645	-62.2757	-62.5233	-93.8853	52.9078	-42.4948	-115.44	47.2048	24.1072	14.0372	-49.99	-4.13319	-91.0743	-56.7101	-5.39793	-12.6161	-13.6203	22.6148	31.362	-14.0298	5.56308	33.8363	-71.3394
921.4	-196.654	-18.3181	-48.4607	0.121689	-24.7463	-13.377	24.1191	-70.4843	16.0786	-36.3098	-49.05	-20.9269	-85.5777	-9.09916	4.77083	-7.81958	15.9999	6.97981	-4.31666	3.46066	-2.1327	-10.8629
923.156	-61.8272	62.4619	-19.7835	-34.9713	16.9745	-34.1715	8.60094	-45.7846	19.979	-43.8106	-69.4289	18.2124	-83.4497	-2.00529	8.54101	-15.5747	-7.5432	10.206	-25.9211	-16.2268	-6.68281	8.59757
924.91	27.3302	37.23	-61.1761	-33.1976	8.77036	-45.603	16.1592	-67.2131	43.6566	-63.1936	-69.2873	17.5764	-69.9185	-39.6693	3.0831	-33.4385	-49.885	27.8203	-0.633141	-26.898	2.65989	10.7009
926.664	-56.3923	105.345	-42.5233	-32.6002	-27.7187	43.0901	-19.8618	-40.5638	-2.14972	24.8358	-17.6729	48.0671	-9.54756	-23.569	39.9998	18.8534	-25.4744	-0.398139	6.79034	-23.3885	4.9363	40.0416
928.418	-216.279	26.372	8.52547	-8.53177	-65.9771	83.663	-56.7833	29.4688	-32.7054	52.1093	1.56898	30.265	23.1749	-15.6947	57.5951	45.0391	56.3514	-20.1355	2.987	-20.5809	12.8279	19.6281
930.17	30.8015	-70.5436	44.1893	-69.863	-41.2191	-5.0861	-92.397	88.8916	-31.1102	-87.3632	28.3905	36.6473	64.2626	-12.4728	37.5127	34.3145	-15.8896	-61.8057	42.8936	-11.9534	4.88631	-8.32452
931.924	52.8875	-11.3997	90.2581	-40.252	-17.4747	39.4607	-86.4047	24.689	-38.8838	-48.0281	-20.3107	43.7398	23.8522	3.03272	12.5398	24.4686	-32.8586	-46.161	14.3061	7.54067	-1.27541	34.0202
933.676	137.821	-65.1729	19.6356	20.512	1.48837	-28.4007	12.2956	29.5086	-16.3154	-0.239225	-0.785819	-18.5061	14.2466	-5.73869	-6.03619	35.7086	35.0092	0.641432	0.416092	8.47454	-4.70229	-4.44658
935.428	-35.5421	20.9408	24.4203	20.3991	30.0075	65.9573	20.5559	-86.1661	-10.2205	122.442	-44.1768	-14.9245	-22.2162	-17.1896	-56.7007	10.4912	17.1831	34.5498	-12.8732	18.8943	-10.3916	33.6996
937.18	-49.9833	1.46004	-37.6286	-34.1774	-46.5329	-7.9971	-33.685	-49.47	2.49226	89.4623	-31.3578	-16.349	-0.125524	4.04197	-38.1025	-1.19546	32.0438	49.134	-42.2165	-7.79618	-12.9616	17.0508
938.932	-30.3473	20.0656	-9.32761	6.13938	-14.2147	0.550941	11.6571	-38.2193	15.0224	3.18042	-27.2728	-6.32177	-44.1687	41.7744	-45.1606	-20.275	3.12741	40.9527	11.8095	5.2682	10.6756	24.8821
940.684	-165.344	7.30484	-57.5829	35.3453	40.9651	-11.8598	32.3692	27.1142	-0.376117	7.59626	-10.6217	-8.71374	-50.8076	43.7651	-16.0592	-19.692	25.3801	40.8693	-19.3118	16.8447	-8.91852	-4.55455
942.434	-137.329	-44.2401	-44.2084	57.6308	8.50434	-23.3913	34.9699	85.1668	9.10228	15.9342	3.78568	8.82908	-43.6579	53.8641	-24.9808	11.6849	55.0941	19.6692	2.87284	33.604	-26.2316	-48.64
944.184	-0.637652	-35.1897	-43.8442	24.0586	-10.2253	-39.9068	-24.4466	65.5135	24.0952	-4.37942	27.3519	-10.1684	16.3559	8.12698	3.13938	6.87871	-26.491	-31.489	32.0824	13.4389	-9.63691	-55.6466
945.934	66.9544	28.3912	-54.0514	38.7898	-2.0346	20.6593	-19.254	-26.1284	-2.52621	53.8496	-8.23715	-4.61255	8.19812	8.71384	5.94395	2.80623	-20.8177	-12.8552	-3.85868	-2.98836	2.12766	12.1456
947.684	204.311	39.1377	-11.3607	24.5169	30.2698	0.967848	-11.0553	-15.6843	-0.883226	20.5608	-2.52886	1.81477	45.5462	-14.4218	-42.5258	3.24484	2.26832	-11.863	13.1539	-4.28961	24.7448	37.146
949.432	47.1664	82.693	22.0298	15.7817	37.2941	45.1323	-1.45259	-66.8836	-6.38542	46.8372	-33.9094	21.7787	-12.655	-5.99738	-69.8952	-1.64757	-9.66707	10.8071	-16.92	-9.99125	7.23057	39.8109
951.182	68.9346	53.2608	8.55619	-7.28087	29.9112	29.9023	1.60489	-7.68062	-4.71735	-13.5953	-22.3157	27.1163	-5.04716	27.9264	-10.5799	-1.77986	-23.6515	6.18277	-20.1748	-3.97211	0.302987	0.389721
952.93	153.92	31.0956	6.0366	34.7871	25.5968	39.1534	44.8501	7.60046	-24.9701	17.5362	-1.62222	7.7812	1.27169	27.0576	-7.20026	-11.0998	-23.2053	4.81621	-7.37867	1.01451	18.4034	-9.09981
954.678	62.4397	-20.9251	-19.2231	17.7086	12.4676	-23.1836	21.6491	46.8655	-36.242	16.5995	17.8026	6.3673	-3.38649	-1.49939	-0.250035	-18.0075	-5.61387	8.23446	-20.4226	3.81022	7.94222	-15.345
956.426	89.7542	-31.7968	0.561873	19.5319	7.41013	-26.1462	11.0607	36.9992	1.31887	3.54993	28.4204	2.62628	-11.5426	-12.3073	-9.04119	-10.3471	-1.77447	2.35669	2.14664	11.3637	4.67242	-24.5512
958.172	-18.7982	-29.9911	-0.51238	-10.298	-43.0186	-14.8293	-39.2018	30.1983	4.11438	9.18656	21.2154	-3.83599	12.4336	-13.7622	28.0655	4.57612	-10.1288	-15.968	-10.7809	-9.24066	-7.39097	-15.5825
959.92	-37.6945	-33.2257	-6.16509	-11.3234	-49.8301	-20.4109	-34.0137	9.46839	5.35362	-23.6051	4.854	-24.4788	11.8482	5.89192	25.9026	3.7869	-22.3534	0.51012	-9.98763	-21.9593	-7.74842	-6.38066
961.666	29.621	11.5069	32.5045	-21.0942	-12.5206	-10.1352	-47.8537	-16.4563	-5.24405	-41.9269	2.06867	-5.80275	23.716	-9.6017	1.99384	-2.56259	-28.267	-8.74687	-0.15622	-22.1445	-4.79721	32.3776
963.412	52.9771	23.0755	52.975	-31.8209	32.8633	-8.78528	-13.7025	-47.9604	11.8465	-34.3519	-18.0631	1.98034	-13.3548	3.3547	-31.3611	13.6828	-17.0377	7.17267	16.2481	-8.09578	-17.6178	46.2603
965.158	86.6922	22.8667	13.512	-3.15306	23.7463	21.6549	16.4605	3.59554	-14.186	3.37076	-1.28932	7.6465	-2.62487	17.5733	16.5373	27.8774	7.01674	-5.72	0.908069	-12.7462	-16.7994	22.083
966.902	212.226	38.8788	-31.7682	22.4314	-9.65758	42.6761	39.4045	-19.5774	-8.18659	67.316	-13.0086	-9.57773	25.0748	35.69	1.78643	21.8512	10.7258	12.7347	14.4861	-15.0609	-7.55897	27.3168
968.648	114.853	21.6822	-29.37	10.7843	-18.739	4.85898	16.0653	-15.6768	-0.675704	37.0317	-20.7698	-11.0356	-13.4148	-5.578	-4.5932	-24.6814	19.5488	14.4017	21.4763	-16.1946	13.5008	38.2563
970.393	71.6842	30.5336	-2.49637	24.7897	-1.28292	11.6193	23.2487	-15.2609	59.643	-29.8486	-28.5434	17.5852	-50.1462	-20.655	-18.0274	-35.9546	5.91296	-3.46952	35.6525	3.91145	14.181	25.0087
972.137	-102.56	-61.2524	15.1186	-21.4772	-91.7276	12.3162	-7.15412	31.4701	34.168	3.20584	-13.6699	0.272995	11.2225	-10.3308	35.328	-1.15586	16.3416	-37.5278	5.57543	-12.7356	11.8631	-9.6186
973.881	-140.804	-143.97	-29.7521	8.38933	-55.47	-74.286	71.0211	57.9599	39.9302	-16.4672	0.300259	-47.51	7.1103	14.1909	17.2589	-9.24666	40.2239	0.905119	-22.6532	-20.3023	22.8949	-39.7001
975.625	-89.8471	-85.2915	-57.0795	35.059	-16.7338	-63.7316	58.6732	33.3821	13.8287	-13.7156	28.6056	-12.976	12.335	-2.71119	-14.8489	8.28345	41.5132	1.63176	-21.1524	-7.52033	19.5435	-20.1215
977.367	-164.432	-134.36	-7.99768	17.9746	-40.2458	-43.1658	12.6621	48.598	31.7144	-44.3567	32.7891	5.30626	8.49751	16.8114	-9.197	47.6082	28.0204	-3.24669	8.90782	18.1339	-4.31577	-34.738
979.111	-140.99	-98.1415	-1.60818	33.3781	-73.4624	-2.04181	-2.26658	84.6976	-25.0374	0.154103	70.785	4.56368	40.2558	19.6695	53.1204	64.3832	10.2059	-24.6326	-23.249	-18.1715	-8.70364	-45.2814
980.854	-75.2821	4.47478	7.78378	31.2872	-49.4174	12.9361	-39.9658	45.8751	-11.658	-18.1242	43.2161	42.7715	47.5295	41.898	50.6063	35.6536	-35.0874	-3.63522	-14.7158	1.65508	-17.5877	9.14427
982.596	-250.117	35.0498	28.9861	29.0196	-55.0587	45.526	-72.5503	-9.61607	-6.61094	-9.90624	25.8717	24.4013	22.0561	-18.2531	55.1624	-5.75142	3.83784	2.39869	-3.48356	-0.556472	-13.3184	8.7339
984.336	-122.087	57.461	32.9766	2.83686	-48.9136	14.9327	-44.1492	-33.29	33.3211	-51.7026	-16.6466	-1.90946	13.14	-15.2588	28.5433	-5.59039	-31.8354	-6.71907	16.6147	19.4111	2.29346	11.1621
986.078	-28.3729	-4.6453	34.2051	-31.0532	-29.2537	12.7112	-53.8789	-41.6687	29.5439	0.639268	-6.79471	-35.5103	23.2553	-5.78429	14.435	15.6664	-10.5168	-13.9896	11.9702	29.4635	16.8755	-3.66998
987.818	62.2279	-54.3689	18.3091	-38.2384	1.75158	-6.679	-12.3944	-18.0468	29.3192	24.3445	-2.12048	-21.0467	33.3425	-5.388	-0.753508	-26.0162	33.279	24.0127	-0.293822	41.4408	1.96282	-16.0956
989.561	89.9955	-78.511	0.681425	-34.9023	-8.67353	9.53191	-9.02444	-12.0947	-13.7909	50.5986	11.0156	-9.26619	53.9491	-6.11466	-16.9084	-21.6389	55.3387	29.0614	1.56416	29.9625	2.77284	-9.49739
991.299	146.619	-93.2522	-12.5475	-33.3179	53.9063	15.9121	19.3316	-28.3323	26.6739	29.0477	-4.61959	-36.0358	16.9698	6.43896	-19.9607	-30.4411	16.0205	33.5979	10.8993	13.2717	2.62533	8.02778
993.039	168.408	-33.5477	1.41125	-2.25943	60.2983	7.04395	60.9589	-29.2844	5.1922	20.7328	-6.29641	-52.6453	-6.92979	7.10785	-36.3986	-42.0704	11.2587	12.913	-3.40045	-12.3769	34.0656	17.3962
994.779	221.238	18.6449	0.57145	8.8608	69.0837	25.9254	37.1902	-30.8569	-7.53377	20.3944	10.3586	2.80221	-2.10603	-1.80561	-0.255351	-33.6852	-12.8199	15.8754	-16.8444	-19.4097	10.5237	23.7516
996.518	67.1446	10.7382	31.9667	-1.97766	27.7399	-9.89435	-2.49058	6.09602	-41.1001	-21.9717	33.733	10.5744	8.43668	6.35044	10.8842	-13.9204	-9.22449	0.456401	7.04257	-13.1542	0.412073	-6.17208
998.258	52.8003	-24.0291	2.2591	20.6145	-7.41894	-66.528	18.4812	35.7062	-38.6093	-16.7838	41.9589	8.97375	22.9937	1.46749	23.0245	7.13623	-0.994849	-18.4609	-22.3235	-25.07	3.13551	-10.4773
999.996	-103.558	-39.3999	-11.4893	17.8612	-38.0832	-59.0742	-11.6774	42.4778	-31.9661	-4.27212	45.8674	8.53741	12.8177	-8.37014	16.1333	14.5507	15.574	-13.2324	-23.2546	-17.2419	-3.24057	-17.4331
1001.73	-126.779	-33.669	-1.0665	-7.15082	-59.8883	-21.5121	-22.2501	38.324	-31.2883	25.0748	39.4153	28.974	19.9931	-7.44492	16.5781	14.0227	9.72859	-18.2907	-1.75516	-2.71327	-20.7417	-20.9824
1003.47	-100.932	4.30123	-3.20492	-4.03913	-49.5879	4.36512	-16.2995	19.0247	-30.4467	41.4618	31.9675	30.0579	19.2791	6.11625	15.0022	15.576	4.62417	-15.7713	3.0037	4.71543	-21.2832	-16.7118
1005.21	-50.5896	3.20075	-23.6298	-11.5774	-27.7403	-9.41068	7.0622	-2.62425	5.59613	12.1802	7.79882	-1.04874	-3.12768	7.3199	4.61221	-10.1277	-5.86613	-1.50589	5.03196	7.63569	-4.2927	-8.96278
1006.95	-21.8592	42.4608	-17.6935	-12.657	-41.9831	-8.08412	6.2872	-19.8203	6.96935	10.2185	-6.58866	-8.3388	-10.0986	7.8534	-26.316	-22.6522	-6.93062	3.03841	3.71081	19.114	4.72998	-5.51262
1008.68	24.3937	34.2595	-35.013	-27.1827	-29.4115	-10.6604	22.1087	-36.8388	14.4333	4.46742	-32.0634	-19.4986	-36.5793	4.36751	-39.4002	-25.4667	0.0864991	9.13144	2.76672	14.1486	13.6263	-0.0349691
1010.42	46.789	23.8101	-34.8898	-8.94661	12.4892	-39.476	38.5665	-42.7952	-6.04113	20.2969	-43.0579	-26.4644	-58.7201	-7.54618	-49.745	-17.3519	25.5334	9.09198	-27.6361	21.2413	24.537	4.19419
1012.15	38.2985	12.2161	-52.4735	14.6507	44.4193	-36.4602	57.3407	-35.551	-6.85949	36.3152	-37.3728	-27.9633	-49.3436	-32.305	-40.6245	-10.326	43.7221	-7.064	-63.1094	10.4693	24.5944	8.36806
1013.89	52.1713	-8.55801	-25.033	-2.36426	32.9073	-22.8493	31.175	-27.6345	38.6732	13.0857	-29.1718	-45.0903	-12.4339	-7.1965	-36.0161	-2.13598	25.9783	7.42215	-28.4155	12.8133	9.93872	-9.42131
1015.62	71.3352	-36.1495	4.22345	-17.3543	42.2221	4.94498	16.978	-10.0475	32.3605	-4.53511	-4.87652	-13.6003	-8.82627	-2.49764	-16.7382	19.7333	3.58962	-6.79581	6.07264	9.47371	-14.8235	-14.9105
1017.36	31.7874	13.8406	21.4584	33.1424	64.539	14.2692	28.1718	-10.8394	26.8542	-3.6306	4.75978	0.482219	-17.6146	-1.4958	-17.8756	19.5278	-9.6778	7.99028	3.76018	3.55251	-18.676	-2.41417
1019.09	-27.8715	-39.6936	22.2667	28.6691	-32.6327	14.6396	22.8923	41.1653	0.95221	-17.4967	27.1742	7.42137	43.6052	15.2227	17.4863	9.19071	-7.33665	-6.86082	-14.2643	-23.5688	6.79203	-8.52155
1020.83	-109.147	9.03051	42.2671	21.5698	-91.5329	37.876	-13.0346	16.456	-20.7651	19.5236	28.649	21.3672	69.9967	9.38149	-19.7619	4.60893	8.05707	11.8615	1.11682	-19.5363	-6.64982	-2.14487
1022.56	-256.622	-11.9664	13.4273	38.2803	-111.844	31.5166	-14.5867	20.1709	-22.8354	25.0164	24.3809	11.7871	24.5242	9.80765	-12.5233	5.51019	42.057	-13.3965	-5.06684	-39.1568	13.2169	8.87073
1024.29	-198.596	44.6163	34.5298	32.5936	-7.03394	69.2951	-29.9202	-36.0371	-24.6119	70.916	20.6543	23.9207	-2.43677	-13.9593	12.0618	-10.4237	14.6732	-0.957297	-15.9085	-9.36129	-12.6182	16.6094
1026.03	11.0261	72.2665	24.9515	0.689874	73.5592	79.8917	-36.1849	-55.281	3.3995	30.0571	4.30591	18.8861	-2.80323	-5.07661	10.1209	-25.0784	-49.6278	-4.78904	2.4898	32.4041	-24.9784	1.16404
1027.76	236.049	47.841	5.52055	-25.8414	97.8873	42.4277	-1.63405	-71.0204	17.9349	27.3761	-11.4508	13.9611	15.804	2.41299	13.5782	-19.1048	-54.4196	20.7387	2.15751	28.276	-13.6307	22.7308
1029.49	125.326	16.3906	-24.4682	-6.37003	104.618	31.6932	35.2442	-49.1537	-19.6952	31.1959	-7.6196	6.22709	-22.8674	-35.2833	5.85271	-19.4293	-21.6964	24.0497	-19.1448	25.555	9.1533	22.0117
1031.22	72.5288	34.865	-5.74784	6.61516	89.0436	26.8632	46.2066	-12.6688	-24.4928	72.4848	-6.31684	11.2279	0.455805	-33.6731	-37.9981	7.60059	-10.0759	34.6799	-45.9671	19.002	10.8374	18.8211
1032.95	319.536	2.07267	14.7175	-30.6133	22.9531	-1.30657	36.5124	55.0739	-42.8275	21.9773	18.5686	39.5119	77.7028	-6.73352	-6.43284	12.3834	-46.7531	-5.382	-22.5771	0.565742	7.38031	7.87794
1034.68	203.1	12.5995	-15.659	-17.8219	-9.73276	5.05796	37.2993	18.3216	-11.9895	57.2091	-4.20704	20.2196	67.0091	-9.76517	-31.924	11.6738	-4.91781	1.3229	-13.3906	-9.67561	-11.908	5.87453
1036.41	-60.4539	4.60002	-10.8217	22.0998	-56.4208	-11.7807	-15.0827	33.137	-11.3159	20.5844	14.9593	14.7298	45.6866	-18.4545	-15.1845	-1.49491	-3.4081	-9.98094	-8.6591	-39.7492	-20.2013	-7.9932
1038.14	-3.70547	18.2284	65.0779	-40.8353	-48.1214	-5.71735	-42.5042	11.7753	-16.3798	-43.5723	0.199826	37.0289	4.48479	15.6788	19.005	-23.5353	-38.2356	-6.41489	38.9355	-48.3723	-30.6422	24.8033
1039.88	-42.9923	-24.4453	25.2507	-28.0292	-27.5799	-68.1802	-24.6399	11.8436	25.311	-145.835	-8.9045	3.51238	-35.1266	41.1735	2.89209	-20.2625	-72.4917	4.29686	75.1372	-29.1823	-37.8137	-10.9089
1041.6	-111.955	-26.9961	-7.62961	-31.6366	-25.4981	-68.5501	-4.50767	-13.5689	-13.8647	-115.519	-32.7127	12.8723	-57.1452	31.9171	15.6734	-1.56949	-17.1812	-13.5044	34.5055	-36.3735	1.17999	35.1508
1043.33	-152.481	8.88481	-18.6181	-19.8061	6.82014	-34.9881	36.693	-57.6429	-17.8778	-48.8784	-57.611	-19.3895	-102.614	2.82993	-32.3362	2.82389	3.42958	27.8445	14.8796	-3.84156	35.7457	17.675
1045.06	-106.698	-15.1644	-20.8107	-9.83778	-19.402	-30.0802	15.655	6.67398	-8.41838	-20.644	-12.7722	-14.2712	-29.3306	17.8572	-18.4325	13.3804	2.49497	14.8108	5.10282	-9.62124	22.5796	-6.57772
1046.79	105.746	-24.2198	-10.6718	-22.9851	-16.0856	-64.4025	-2.65336	32.6136	-2.37447	-74.0279	14.1004	14.972	22.7742	-9.49926	14.5556	5.11018	-4.24993	-1.58981	-7.06417	-15.7331	8.41351	5.42158
1048.52	1.81531	-38.8943	-44.9297	-7.59533	-0.372159	-37.5854	17.5748	50.0231	30.7896	-57.9397	-25.2112	7.23719	17.8172	-9.61149	-15.308	2.3847	37.8892	-12.9236	-16.4387	-12.0785	15.3645	-3.74313
1050.25	-140.592	15.723	12.5941	12.976	-33.8399	29.0383	-47.1652	83.6475	1.47455	-38.3036	7.47801	29.9679	59.5274	16.6224	-23.8326	20.7757	19.6228	3.60927	-10.7469	-5.50368	-4.28311	-36.3191
1051.97	-26.9494	19.1194	-38.5551	59.3869	-22.9974	2.62477	22.0641	38.712	-9.67001	10.8728	-6.98703	-5.66323	-25.1658	17.4568	-27.3187	-2.89371	28.5613	-11.9367	-10.0436	-31.4412	24.6685	22.2059
1053.7	-114.554	25.8162	-77.1256	56.9714	2.37904	-32.7456	36.1708	36.6105	44.7708	-68.5284	-23.3368	-48.6281	-66.8696	14.9943	-19.3687	-10.3236	-0.30482	-38.948	-3.80458	-8.12517	12.2792	-18.5465
1055.43	-57.2182	-14.3147	12.7503	-31.1335	19.3859	-27.2769	-28.0208	31.3829	17.7237	-56.2128	-4.95544	-16.173	-28.9324	27.5456	12.7482	9.07085	1.83236	-49.2989	32.7689	18.1041	-4.89435	-8.66274
1057.15	75.1966	56.6299	17.0363	-38.491	34.1013	2.42223	-32.5208	-40.2506	-15.0404	-18.2066	-10.9756	23.1917	-35.4004	24.7275	-17.6632	5.7901	-39.5237	3.53918	29.0115	21.5257	-24.4504	9.4065
1058.88	-14.337	-8.44183	-26.6443	-12.9275	2.57966	-17.045	-32.8419	-25.9171	-3.49575	0.56292	-4.45539	16.33	-17.3128	21.8086	-3.24312	6.56137	-21.9986	-10.3258	8.50427	0.397895	-34.4031	20.4377
1060.6	38.7312	-15.4854	-29.3828	23.1835	63.5578	-3.9139	23.1212	-42.3621	-2.89696	12.9707	3.54409	-9.00497	-27.4	-0.601821	18.5398	-10.2856	2.68311	22.266	-22.9309	-15.9764	12.5939	38.8642
1062.33	-66.6759	-103.554	14.0679	-78.3123	-6.2734	-58.8733	-19.2256	61.3928	-4.97084	-101.072	-46.3594	21.729	-57.2116	67.399	-36.1869	11.1046	34.3908	-20.221	46.1002	-0.710125	10.497	-3.25569
1064.05	-28.9776	19.0984	14.3649	-31.8691	-24.8906	32.8487	-16.6971	-7.68907	17.2212	8.26109	-47.416	-6.28383	15.7527	25.6631	-14.1452	36.8197	20.4743	-8.99351	6.46777	12.656	12.3953	-41.8789
1065.78	-87.6452	76.8568	-66.618	82.3255	-41.1212	17.6189	58.6344	-33.3662	-1.57745	62.7256	-74.2929	-49.2641	-54.6186	-12.9395	-22.6398	-14.9408	43.5651	-30.8474	-33.6812	-35.881	36.5198	-36.1357
1067.5	12.7447	76.3147	-68.8568	46.2912	-15.6097	2.48169	52.4637	-38.5151	25.122	36.6892	-54.7534	-70.6484	-21.1185	-36.13	8.21613	-34.6529	17.0413	-17.568	-26.3659	-17.2131	54.3062	-23.95
1069.22	-41.1096	-9.43775	34.2053	3.17242	21.4767	17.3192	20.0111	9.035	-0.67592	-4.0318	-20.0843	-18.1489	2.94413	-29.0102	-5.70651	-14.1605	26.1356	15.3257	1.12937	3.00749	-3.57675	-32.6288
1070.95	-28.091	60.0968	22.1116	26.3522	63.0126	82.3979	-3.84556	-28.237	-29.3515	38.9541	-9.29203	59.1898	11.444	-42.4426	6.91031	-19.3548	-5.27185	14.5977	-24.2557	-4.51432	-10.8929	38.8698
1072.67	33.1176	84.2814	28.3447	22.4125	66.0174	84.4687	7.69581	-42.3539	-0.39611	41.1992	-4.88409	49.6654	-9.9166	-5.76637	5.85957	-5.01236	-10.813	0.712008	-5.25153	9.22071	-13.5743	37.0597
1074.39	50.5305	73.4843	35.2415	24.9115	79.6313	52.3517	16.2254	-36.6153	-7.47823	3.49338	-0.0016566	33.7466	-29.4105	20.0682	1.78033	-21.5482	-3.14375	11.9232	8.27701	19.7765	7.05402	38.4647
1076.12	-54.1396	-35.6721	16.7817	-9.78932	13.9455	-2.0679	-13.9953	11.915	-27.852	-7.31287	10.6704	33.8317	-18.9827	18.7029	-0.209779	-17.4311	27.3413	0.525358	3.43782	15.9897	-16.3216	14.7604
1077.84	54.1233	0.0824338	-17.3006	14.1298	29.7312	1.87375	22.3567	10.8079	-5.49229	16.3945	18.4812	5.49583	6.93201	21.0351	16.6143	-9.50048	-3.31555	8.68461	-13.6658	16.2292	3.86905	2.72239
1079.56	46.3512	32.1032	3.03736	32.7967	24.9585	6.2678	32.7852	14.4337	-12.1194	23.6981	9.99382	-10.1285	2.76715	26.9341	28.1429	-4.19537	-17.4788	-2.98915	-12.0749	6.97435	15.7774	-18.7492
1081.28	94.7513	5.54321	-13.4054	29.6815	35.4526	-19.8619	34.8176	26.0131	-8.22632	23.2701	23.2369	-19.7677	16.7306	14.212	28.6909	16.1238	-8.18228	4.23029	-16.8445	6.45878	19.2088	-20.4677
1083	40.5489	-8.91987	2.44442	22.3975	37.4087	3.69417	10.1669	26.2708	-21.3516	16.5618	22.711	8.84504	16.988	-10.8942	11.9513	3.92364	-0.392725	1.23607	-11.7196	0.120924	-5.51019	-21.694
1084.72	3.01773	-4.29198	4.76181	1.28514	39.94	18.6303	-17.4214	7.8454	-27.0763	43.7174	20.3625	26.4712	27.4854	-28.9706	4.24104	10.8589	-4.31399	-0.734008	-9.62942	-5.90836	-14.1991	7.59261
1086.44	-17.4869	14.931	3.83325	13.7428	1.36325	2.75185	-24.0488	-17.3486	11.8664	11.1837	15.2882	3.33971	6.40593	-33.2589	-14.0104	13.2911	6.89069	9.42678	14.0151	-10.5398	-22.0286	-3.37147
1088.16	-142.287	-0.245182	33.5993	-27.2633	-54.5443	-8.64978	-43.7714	-20.4871	7.75874	-33.9149	4.60013	-3.72606	19.9329	-5.28832	-27.4174	21.6668	5.86174	5.56808	25.0422	-7.92114	-17.2792	5.17179
1089.88	-262.128	-64.5974	21.3729	-20.0394	-84.6065	-45.3543	-38.363	56.883	-6.28378	-41.3701	32.1174	-6.97381	29.7869	13.4763	-7.98858	13.366	30.4057	-1.83642	0.492811	8.13827	-30.4164	-17.7929
1091.6	-41.7357	-20.5266	6.87042	-35.396	-30.2975	-55.207	18.0262	43.9151	24.38	-57.3834	6.83965	-39.1984	-1.06	6.72645	4.52759	6.42768	-24.0435	17.0915	4.70751	13.3041	-0.654912	1.45822
1093.32	-21.8095	56.3609	107.931	-60.1203	-63.4216	-57.6291	8.67885	-22.0552	42.3051	-122.203	-23.2579	-60.825	-10.1175	3.63015	-4.55803	-5.0223	-52.3922	-12.6117	37.619	4.25632	12.8407	-10.2924
1095.03	206.035	8.2072	10.3403	-50.9522	20.889	-78.5	50.6472	-3.11801	62.1661	-81.7069	-26.2659	-77.1691	-26.4575	-30.061	-29.5557	32.779	5.97369	-25.0377	0.141289	-7.23384	21.4979	-13.417
1096.75	248.366	-1.28377	18.0822	-61.1986	-13.568	-16.1992	-28.5777	-16.3093	12.0608	-15.4694	-10.602	28.8857	11.8052	-55.5309	0.260322	-12.3831	8.12771	-11.5297	23.2564	-40.5865	-20.6531	28.4615
1098.47	2.34523	55.8097	11.0964	-69.5449	-100.672	-2.28686	-57.7205	-23.3632	16.9587	42.6081	-4.27334	-4.34002	25.8774	17.038	-23.6918	23.5772	-0.939728	10.7409	20.7511	-37.1411	-7.89498	9.84038
1100.19	-92.6141	89.2696	11.4569	-4.75302	-82.8639	4.58808	-52.9013	-33.7093	45.1175	-2.93272	-8.04641	-11.3542	-14.8107	10.402	-13.5085	-5.7649	-17.7614	23.3317	0.66127	-4.12927	-1.7917	-8.98388
1101.9	-146.834	65.2881	24.5819	-13.6023	-58.706	35.2871	-52.4633	-8.72514	4.02691	11.7889	15.0593	11.4637	21.5866	41.8897	3.69242	-8.76742	-35.7935	4.86495	6.83904	8.325	-9.76027	5.34909
1103.62	-101.128	39.4324	21.4084	35.3692	-10.5394	35.205	-0.245781	13.6109	-8.88902	57.8315	23.4699	16.9227	19.0739	30.0702	16.1266	0.434405	12.6376	11.1148	-0.162473	18.3516	1.31985	5.25186
1105.33	-84.5046	-8.38708	-8.51026	38.7013	-4.43205	15.869	28.652	7.66569	-6.97202	85.3923	24.5388	-17.0659	0.0677635	-2.59903	26.7827	10.6631	25.3404	10.5348	-17.956	-8.02248	0.736156	4.78126
1107.05	-72.9166	-26.3605	12.267	9.73399	-22.9215	-16.6529	5.88025	5.6755	-5.34067	23.3451	19.1147	-17.9777	-1.53272	-11.5517	3.44755	3.87401	14.4654	-11.3947	-3.02537	-3.79249	4.93552	6.76258
1108.77	-38.8353	-31.7137	-19.2239	9.68298	21.3425	-30.6374	23.3007	0.320408	10.319	16.9421	9.35904	-24.4681	-26.116	-21.3569	-8.72584	1.07645	14.24	-13.6311	-2.80881	13.1328	-1.5783	1.97915
1110.48	-9.73473	-47.4415	-21.125	17.9269	33.1373	-21.5264	32.552	5.44743	-4.99096	23.4467	18.7026	-7.25728	-24.7032	-7.96628	9.57973	3.21315	20.2787	2.33527	-2.26203	9.17441	-0.24045	2.52184
1112.2	-28.6691	-19.5537	14.3376	-4.23753	4.81119	-18.8003	10.2932	18.8647	-3.5354	-22.227	10.4899	8.78792	-4.06104	10.6481	17.8508	14.6649	8.86196	-17.0288	1.06086	9.77932	-1.78429	-16.4422
1113.91	63.8862	-39.4254	-0.937254	-14.0745	32.8482	-40.9307	-2.52266	21.6437	14.2741	-58.1638	3.19107	2.62735	-14.6655	-14.7138	18.1866	-9.62974	0.747265	0.154309	0.498639	24.0362	-8.0193	-21.8885
1115.62	170.336	3.18801	31.0029	-8.27054	73.6545	-13.5035	-11.1896	3.17524	8.09942	-76.9154	8.26758	39.3961	-5.77849	-35.4168	12.2455	-22.4125	-15.3818	-1.02592	3.90813	26.7232	-13.571	-4.59469
1117.34	204.325	-31.6948	-4.24818	6.66084	38.5865	9.37707	35.1608	-10.4718	18.088	-6.77912	4.56165	-0.764281	8.29172	-29.0289	-7.74785	-8.0283	26.9793	21.7626	11.4766	7.74062	14.4864	-14.08
1119.05	143.868	-28.7768	-21.4087	11.6324	21.1213	19.8104	39.7662	-7.66046	11.9501	32.2742	1.6875	-28.2252	-7.08549	-18.4971	5.57008	9.31852	25.9435	12.1228	-14.758	-14.3055	21.8952	-20.1749
1120.76	235.209	50.7566	23.8049	-18.0977	-0.0870032	16.8365	-19.6367	-53.6089	-12.3731	6.85738	-27.3293	-11.8562	9.00141	-19.3127	-30.0615	4.54604	5.73955	8.68259	-9.42889	13.4276	39.5637	9.79929
1122.47	135.132	67.6454	-21.0371	-2.50033	34.4664	15.0773	-22.846	-110.576	23.2881	6.56283	-42.6638	-21.9664	0.468531	-22.6041	-41.1533	-27.7822	-11.0774	11.4612	-13.3855	24.6018	19.3371	24.088
1124.19	23.7275	9.37971	-13.0492	16.4282	10.7861	42.4617	4.55568	-82.1425	-14.6727	42.1169	-21.1782	9.02471	16.8452	14.9428	-10.0237	4.08138	4.71	16.7731	-35.9811	2.72163	12.959	23.2652
1125.9	-108.453	-69.815	19.785	1.98796	-17.1454	-14.4237	1.23202	20.8131	-11.4621	-35.5591	-23.8121	29.6134	13.6404	16.703	-5.95941	10.2956	2.36328	-27.227	-20.4863	3.75333	-1.04647	-7.17675
1127.61	-113.195	-120.409	19.9629	-12.0577	-57.2552	-41.1703	-11.0372	70.4629	-12.377	-26.1749	12.9559	-14.1617	23.1516	17.0875	7.24826	4.57466	-4.14106	-4.65684	14.515	-14.5568	-3.85593	-28.9962
1129.32	-40.9854	-42.8322	34.105	20.274	-29.084	-28.8502	-15.1956	61.9148	-35.0297	-53.7104	50.8451	34.4508	35.3825	11.2572	53.5643	-3.11114	-30.2069	-21.1023	2.97121	-12.2316	-11.4564	-25.7472
1131.03	-103.688	-80.0728	-56.5749	16.2408	-53.5434	-40.4006	15.2923	67.0114	-54.1884	29.1974	77.0508	-10.601	31.064	19.7213	14.0924	6.27428	15.1347	6.17034	8.40701	-30.3763	-0.640963	-40.1404
1132.74	-75.5647	48.3024	-10.212	-4.81024	-8.07848	36.5503	-17.5257	24.4086	-68.8672	30.5281	48.2707	20.6047	4.49835	22.0293	26.0227	4.4459	-12.3467	-22.2652	20.4587	-29.2026	-4.88996	18.8264
1134.45	-10.6615	160	12.4528	20.9811	17.2679	57.0759	-25.9898	-23.3608	-73.3347	30.6963	26.7766	37.1214	33.9547	-11.2296	28.2127	-8.36288	-33.9843	-18.796	-22.9096	-12.1742	-5.63936	38.2707
1136.16	-19.2629	89.0424	24.6827	-3.43088	21.8788	30.85	-47.5198	-26.6575	-14.393	-39.5434	14.1473	58.3396	41.9606	13.3304	36.8062	-9.66782	-24.9816	-24.5608	-0.319441	9.20733	-26.1184	19.2993
1137.87	-38.5992	21.5951	46.6852	-19.0818	8.54195	35.7283	-23.2582	-34.2268	-8.14884	-3.05994	11.0166	36.1065	32.0163	-1.50303	13.5363	-11.1138	-27.1476	3.90902	25.4214	19.23	-33.1486	8.49457
1139.58	-76.4759	-53.9925	61.3315	-26.2079	7.22243	26.702	-5.18077	32.469	14.1077	-35.8443	12.4263	29.8506	13.0678	-1.69098	10.1878	11.1632	4.06916	-22.6294	24.8529	5.98214	-3.74898	-1.12056
1141.28	-86.709	-72.1482	44.0345	-11.8113	36.3744	34.867	14.8034	-17.3096	3.58835	23.4773	-7.41128	-10.2873	3.59213	-6.69209	32.1356	-6.90728	39.9952	-0.482965	-4.95531	-13.1738	-5.1598	6.36436
1142.99	17.3626	-29.4428	12.5305	16.4303	88.5256	42.2441	17.0197	-68.7515	11.946	13.1357	-18.4081	-22.1247	-0.0321056	-32.8487	53.4355	-32.9258	33.315	22.2991	-19.2548	-5.80204	-10.392	17.4628
1144.7	-27.1685	-2.92588	-31.4525	-5.59465	52.4378	8.35724	2.8609	-67.2187	25.052	32.2906	-12.4458	-45.125	-23.2414	-36.2282	-23.9567	-10.9436	24.6009	24.6982	-8.97993	4.35352	-14.4454	14.905
1146.41	-5.79792	31.8295	-1.88529	-42.2186	32.4339	33.847	-21.2674	-51.4617	17.2385	9.359	-16.0767	-39.2177	-16.6634	-23.3831	-20.1299	-8.9995	-0.637748	14.302	6.4501	1.43832	-5.86798	23.6985
1148.11	11.1619	28.0179	0.537433	-31.3473	-6.89532	-10.9969	-29.9475	15.9393	9.86705	-49.2059	-3.67219	-0.823047	7.12192	-16.4627	13.8097	6.94242	-29.9516	-12.2076	-7.69065	1.59644	-7.99609	0.838954
1149.82	79.4625	9.32075	9.91723	-19.5964	34.304	1.23685	-5.73852	32.3513	-3.19856	-34.6267	-2.28989	19.0427	2.58456	11.8611	16.6279	5.02731	-20.8111	-6.66146	-7.09724	16.0832	2.03663	-13.9837
1151.53	124.418	-1.64508	1.76501	-6.63198	62.9796	23.3786	13.8561	26.5369	-1.16784	24.5293	10.4613	9.92758	5.3175	1.47915	8.57025	1.41628	-25.8101	-5.94671	4.36767	9.00567	-2.45327	-19.1158
1153.23	114.001	2.55137	12.284	6.93119	58.7677	61.8068	12.0625	14.5803	13.2884	11.1897	16.8037	38.7528	12.2005	19.5197	12.9661	21.7709	-14.7426	-3.80134	3.7391	2.69379	1.4382	-13.558
1154.94	52.4784	-19.7546	-32.0507	54.364	78.2182	7.08317	41.5311	-1.72104	40.8248	3.16062	-6.10275	0.5341	-22.2294	12.7597	-5.8887	6.57656	11.7893	22.0359	-19.3372	5.55214	4.02324	-12.1788
1156.64	-48.1305	2.95819	-14.923	72.2329	38.8518	1.9957	5.75774	12.9063	17.3102	-42.0768	0.262376	13.2141	-3.04785	8.69838	13.1402	-1.05788	3.12709	15.0176	-25.0692	-9.97386	-4.72942	2.24193
1158.35	-84.3976	53.3861	26.2691	48.8414	7.52808	-1.36346	-47.8759	-0.151378	3.42111	-33.5382	-1.07569	16.2862	-20.5154	3.67689	-17.2558	9.5523	-10.1436	-4.81917	0.511781	-12.1055	-2.11934	20.7814
1160.05	-86.6746	74.8836	60.3148	20.938	-22.1508	10.1924	-62.1135	4.72768	-14.8615	-60.5204	1.28372	3.9282	10.4397	-15.2224	-16.4503	-6.39874	-18.0333	-8.25726	20.0876	-14.713	2.37861	-3.91604
1161.75	-5.05041	32.712	2.48123	15.2085	-34.6102	-27.0206	-23.2427	34.8291	-32.9415	-34.4932	-0.163944	-1.26157	31.8594	-26.8346	29.7888	-7.5636	-26.862	-29.3164	3.81291	-22.3636	22.2043	1.96593
1163.46	-83.0772	-20.2808	-46.5006	14.2628	-12.5204	-25.4354	39.7329	49.954	-26.0598	17.5078	12.0816	8.57059	19.826	-9.56214	20.5871	-18.2676	7.66478	-15.3252	-24.6719	-0.518161	-9.41927	-26.4061
1165.16	-5.62317	51.8338	-61.7761	3.05489	13.2814	22.6905	45.1971	-37.5854	-2.5023	101.206	-8.6892	10.3579	-10.2571	8.78734	-19.4251	-4.10554	3.76585	-13.7839	-23.2136	27.1088	-17.4236	-25.6341
1166.86	75.3651	18.7036	-25.3322	-5.80127	4.53472	49.8131	29.0665	-62.9131	18.5125	100.298	2.36905	7.48338	13.7527	4.89823	-14.6836	-0.67782	9.06004	18.1987	4.22839	39.3601	-21.4976	-21.8836
1168.57	-4.54931	-77.345	-37.575	10.5277	-27.9495	-28.2266	26.2232	-19.7929	33.6532	43.8333	-3.31907	-33.2341	-19.204	11.1016	-33.6615	-2.11699	28.3046	44.0782	14.8126	21.7414	-18.172	-17.1385
1170.27	-52.6848	-66.4208	23.1977	-18.3762	-72.1156	-23.9179	-35.6544	3.30056	-40.6988	-16.9533	9.02247	13.4067	35.3344	24.5141	-0.0150889	-26.2848	-0.566996	28.0624	15.338	2.11313	-14.9692	9.47953
1171.97	-120.285	-62.6989	-4.19635	-10.513	-76.0003	9.97795	-21.0746	-20.7621	-21.8227	51.2655	-10.4235	-9.53742	-32.8849	24.2607	-30.6818	22.165	34.0676	16.4523	13.0073	-3.17071	3.05318	-2.94954
1173.67	-7.50798	-72.5086	17.7981	-21.0407	-23.8709	-9.84096	0.893062	16.1133	-13.8024	-54.8148	-0.864967	-17.4504	-8.50311	2.69952	-30.7379	-10.8001	2.57116	1.07792	43.209	3.20203	-1.54859	-27.0037
1175.37	-39.5103	-53.3836	7.66418	-62.9926	-44.5926	-9.89225	-2.8028	25.8554	-12.0989	-33.5562	0.249355	9.13662	22.5383	18.7024	-14.6464	-2.79833	-40.4909	5.0961	46.4634	-0.453706	-5.9711	7.83061
1177.07	-149.891	-35.0442	-3.17669	-69.9765	-96.5278	-13.7196	-30.5128	30.1741	7.02838	-63.9692	-15.8829	32.5179	39.7387	23.9607	-15.1755	0.800046	-41.9019	-6.33907	29.0663	10.8553	-33.2016	-6.50296
1178.77	-7.04394	30.5761	-21.1953	-19.9927	35.4171	0.421518	20.6962	-20.9451	0.00890901	5.38808	-26.8768	15.7569	-12.5271	31.3533	-20.8488	3.88923	-34.2009	-3.67318	-19.7636	29.172	3.3385	7.99578
1180.47	15.5531	-27.7552	1.92296	-17.2183	33.5237	-10.141	13.3677	17.419	1.57386	7.40664	-1.04708	-2.6304	-10.6768	-25.5317	5.58152	7.03977	-17.9614	-21.9558	-12.6639	2.5885	13.4683	1.61188
1182.17	-2.31544	-21.9578	24.3661	-32.9269	-42.427	-19.342	-14.9721	19.686	-3.23503	-22.5412	-11.657	13.531	-23.6661	9.05387	0.521151	30.8386	-12.1747	-32.3354	5.9397	-15.1622	12.0409	6.81599
1183.87	34.009	-40.2473	-21.3093	-24.2818	-37.3285	-27.1772	12.9017	27.3403	-5.62586	31.1543	-1.45919	18.5943	9.71978	26.3736	-23.4246	26.6499	30.0141	-1.55256	2.48723	7.33606	11.1671	-16.5074
1185.57	0.420576	-91.5191	-65.3782	34.473	-25.8973	2.93247	45.7981	4.58971	28.0008	95.8256	2.40427	-16.7737	-29.5447	-4.76418	-15.5255	34.7016	81.0104	4.68834	-9.88283	-10.894	-8.60327	-43.5745
1187.27	51.5826	-72.1998	-38.1732	49.7093	-20.0812	-46.5891	21.1657	59.8136	18.9445	-37.4281	33.5174	12.9724	-17.9015	0.204155	5.82355	-11.14	25.39	-7.28627	18.0241	13.1275	-10.1892	-33.1231
1188.97	0.648599	42.5621	0.87989	25.6537	-71.5599	-27.4724	-5.13231	43.3372	-15.132	7.32662	17.949	27.1854	-6.128	1.42635	-7.51859	2.45015	6.97366	-1.49135	2.58647	5.30766	4.83255	7.65266
1190.66	14.3893	18.6232	-37.497	18.9517	-77.2506	-41.9166	-0.867796	24.3327	-24.4959	2.35563	4.31965	5.20287	23.4054	7.98999	7.15916	1.68086	19.4166	5.61578	-12.122	3.79153	21.8448	22.7173
1192.36	-2.94571	-24.2063	-63.4265	40.949	17.4067	-81.9047	17.6371	21.8056	4.15892	6.07081	11.6295	-31.0222	-13.49	-8.70715	5.16572	0.281329	13.772	7.21135	-27.2786	9.84215	9.59356	27.9375
1194.06	-100.532	-55.1837	-19.4761	55.3367	38.2403	-63.1249	31.8458	-10.4543	25.1469	-23.0739	-19.267	-41.5205	-47.8124	-48.6494	-9.76311	-21.0108	14.7467	17.8621	-28.9576	3.53486	9.48641	20.9813
1195.76	48.0058	-34.0866	20.643	-23.2634	57.2212	-94.3957	-22.5093	2.65365	-0.720792	-107.934	-22.8148	11.3133	-23.9845	-37.8761	-1.3477	-32.8858	-23.2697	-2.80343	-12.3726	22.7121	2.3646	33.4672
1197.45	145.864	-38.3753	-6.12457	-42.5632	6.22132	-48.1125	-22.8153	24.0615	28.2839	-26.6474	12.116	-7.26694	29.8082	-18.5018	16.3786	0.127721	-3.79304	-26.4929	14.4133	-3.26141	7.77453	7.81703
1199.15	20.7866	-25.5336	-28.157	24.868	-26.5592	-7.30814	-5.21308	12.5197	23.2377	5.20084	4.63583	-29.4567	12.5479	-21.6642	8.19934	-1.83791	15.5428	-24.8679	-8.2817	-34.7516	10.204	-11.1603
1200.84	44.4394	-3.29581	-9.35087	15.0568	-17.0355	-34.3902	-12.174	42.4052	2.10415	-68.1941	11.9641	0.10861	-6.00131	0.961889	5.63224	-2.01335	-13.4163	-38.4651	4.01831	-12.7263	26.7464	-8.43968
1202.54	95.9916	85.1452	7.22615	-3.45973	29.4105	20.8789	14.6654	-15.1956	-23.0113	-4.0698	-14.6314	20.1157	-39.5827	28.1437	-8.25821	-12.8015	-21.8278	-14.7121	-5.03544	1.35211	33.2121	-1.66139
1204.23	125.276	49.7797	-51.7572	-23.6258	31.6082	-16.8218	30.908	-50.3316	23.9744	1.62729	-19.847	-45.0422	-15.3692	21.9908	-21.5669	-28.6601	-30.6615	36.3917	2.63348	10.1526	35.1119	6.72693
1205.93	-127.117	61.8493	-18.8643	-44.9711	-31.9279	12.8766	-25.2491	-62.6999	21.0004	11.2146	-44.3263	-20.9561	-32.2442	-10.7642	-28.1655	-11.2937	-8.36041	17.5077	-15.0765	-7.17041	-4.94597	7.79892
1207.62	-150.028	12.2983	-3.34223	-25.8778	-3.01566	19.9493	-2.71204	-53.0435	27.7745	-1.37534	-50.006	-4.69036	-39.4363	-3.02334	-33.6275	-24.0826	17.9779	40.4999	-15.976	6.2	-19.0368	-0.0905907
1209.32	38.024	33.5721	21.896	-66.844	21.2798	-24.546	-28.7435	-32.4848	20.1882	-28.2693	-36.9543	5.25896	-22.1183	-8.44262	-36.1319	-28.1511	-1.6264	7.1338	10.2701	14.1094	-13.4928	34.8756
1211.01	119.9	12.9132	-22.0609	-27.9344	-29.7699	5.45276	12.141	-22.6893	42.0082	64.5111	-4.20304	-38.2445	3.68799	-19.9598	-13.4904	15.7714	22.7369	-2.24582	20.1167	-5.27459	-6.38868	1.53263
1212.7	-49.2519	-8.6173	-27.1635	27.6631	-33.09	0.708961	20.3281	-3.15299	36.2102	69.7201	11.0477	-49.4019	-6.40794	-14.3394	-18.9753	28.8832	31.5292	-3.91583	-10.226	-13.9027	1.52449	-5.98516
1214.39	-37.9947	-37.7988	-6.73876	29.8917	-16.766	-24.1064	-1.48778	3.08667	15.3605	0.838977	19.5649	-13.796	-16.6445	-15.121	6.49812	12.5789	15.4683	-14.5624	-3.49589	-0.73085	-5.28384	-19.5078
1216.09	-50.9748	-36.9491	1.4192	49.1327	-20.9499	24.6984	-4.79472	-1.30092	-3.71413	36.649	35.2973	21.1711	-2.41454	-20.5266	24.0593	5.94493	26.3871	-20.1166	-19.5439	-4.75633	-18.797	-20.6917
1217.78	-6.96366	-30.0001	-20.0712	45.3371	13.1695	-1.61342	-4.37518	9.08304	22.5757	2.02213	30.1127	-11.1895	3.07245	-11.2654	36.532	-10.6539	2.029	-0.154133	6.1955	10.0139	-15.2742	-29.6315
1219.47	-30.2731	-57.0078	9.17808	9.93489	-20.9722	7.26701	-21.6544	33.3122	-20.9959	6.48803	35.6482	31.7553	26.5925	1.15051	42.9901	9.02567	18.9158	-5.4912	23.2164	-7.7138	-32.1099	-14.0113
1221.16	109.037	-59.8899	25.7339	-11.2375	-4.14451	22.5363	-27.7794	43.8629	-10.4118	0.426963	37.0483	23.999	51.9231	34.5491	43.8414	9.21576	2.81935	14.6271	40.9606	-5.09216	-14.3556	-1.87281
1222.85	146.987	-43.325	24.7567	-14.1371	22.9404	-2.4894	9.3383	33.8855	-2.42801	-7.62216	5.12038	-10.8737	23.6577	20.2724	26.6487	3.18166	-1.28721	20.9481	35.6643	-7.26981	3.03239	5.85213
1224.54	149.35	-22.4359	-1.12643	-5.98994	22.1302	15.8647	21.9424	19.6756	-7.50397	10.5077	-3.55449	-19.4229	32.5224	3.83625	25.9155	3.98938	9.84233	27.2561	29.2711	-10.3664	10.494	-9.43145
1226.23	106.708	27.4648	18.9037	-10.7364	54.2349	19.7839	13.9789	-21.7564	12.9899	-12.7516	-20.0286	-23.2601	5.4461	17.4336	8.61863	-8.95947	-13.3504	21.6217	12.8497	-6.50031	17.2864	13.0884
1227.92	55.5578	24.8633	15.4516	-28.1154	17.8376	2.50808	-6.55359	-33.5905	16.4522	-54.32	-21.774	2.26936	-6.91906	-0.907102	2.06664	-13.0409	-13.8069	1.70497	0.393058	-9.08621	-2.81467	15.1372
1229.61	42.214	17.5836	-0.463612	-1.0128	25.1718	9.91052	8.2675	-18.2823	14.7834	-23.6583	-6.8987	12.7447	0.265151	-16.7561	7.48844	-1.59228	6.64617	-11.193	-21.3508	-15.1764	-6.5313	25.2216
1231.3	27.2357	34.5625	-30.4079	19.6197	48.9418	-13.5868	26.5773	-13.798	18.0461	-9.81208	-6.72345	3.16944	-24.5535	6.86004	-2.80705	0.188025	1.4824	-7.61984	-9.12617	3.91399	-5.55586	16.8742
1232.99	53.7329	0.196982	-28.2952	32.4146	39.6043	-28.7754	40.5582	-4.41317	1.33568	17.0313	13.2732	-8.63202	3.84723	12.5924	-5.05534	11.0633	0.86043	8.65765	-4.51283	-1.6799	-1.72508	19.7032
1234.68	42.827	-6.80281	-22.7877	35.8815	38.6547	-11.1418	26.0253	1.38583	0.842124	13.4808	12.6986	-19.2296	3.95267	22.5223	5.38812	-2.7105	-17.029	17.835	-2.68739	7.10945	6.84101	2.12406
1236.37	-41.8292	-14.9709	-10.8743	28.0491	6.51048	-14.1817	0.0476575	12.355	-1.76054	-20.2632	4.0187	-9.36635	0.0263773	15.3089	0.295581	-1.3496	-19.2242	5.81951	-5.33743	5.0308	-1.15545	-9.05274
1238.06	3.09439	-9.69118	3.52748	11.6687	33.3877	1.34992	-16.4733	0.0384389	-13.4302	-15.0036	2.08462	4.67825	11.109	5.26835	-0.512593	-10.3398	-20.6034	-1.68736	4.05994	12.1348	-3.6162	-13.4833
1239.74	26.4189	16.3834	21.9822	-7.64218	35.2084	12.6689	-31.8147	-23.3944	-4.27602	-31.762	-7.21461	15.1447	1.96209	7.3527	-16.324	-11.0458	-21.7389	-0.562883	11.4226	20.016	-5.24411	-14.7889
1241.43	6.00063	-2.90317	43.4571	-32.9027	-5.03061	13.1407	-49.7861	-14.3963	-14.6233	-26.6727	-2.86773	41.4258	18.1644	-8.13205	0.367654	1.98444	5.57013	-23.2441	24.2492	3.56139	-12.3916	1.24507
1243.12	-17.725	-15.7011	40.5131	-16.5175	13.091	22.5991	-24.1392	2.19686	-10.2079	-9.25701	-1.8462	40.813	3.02003	-10.8444	8.98044	5.76769	32.4009	-23.7788	14.7853	-0.939548	-6.79963	6.07772
1244.8	-0.553349	6.23081	26.366	-18.6027	0.32681	42.1727	-11.0164	-10.2452	-10.7307	38.0289	-0.0272378	23.8589	1.7586	-2.91691	4.56251	7.18405	24.2019	-11.2858	18.9742	-5.4037	-9.56949	8.84961
1246.49	-17.3827	4.49702	21.7265	5.26478	-7.88726	56.3814	20.6503	-14.6531	-5.47217	47.8527	4.81995	-2.83233	0.0801669	2.20811	14.4003	15.1738	15.9495	5.17795	7.75739	-10.8777	3.72766	-8.74304
1248.18	-12.5511	-26.2987	4.85864	-7.72243	5.17934	42.1991	31.9219	-1.19086	1.69796	16.7742	-1.77733	-23.2461	-22.5902	5.41592	17.3518	1.36305	13.177	8.19303	8.21906	2.21657	18.1628	-18.9005
1249.86	4.62394	-10.6782	13.0621	-19.4411	-39.6326	14.6487	11.8884	11.6873	-1.51597	-7.97639	0.0692552	-26.5169	-5.21621	3.16726	10.1656	11.7351	-13.7464	-5.87206	-1.71988	2.14508	18.7033	-18.7246
1251.54	21.1664	-17.2289	-7.29536	-15.918	-2.50309	6.23055	43.7338	-4.14904	7.82463	-9.19251	-17.7069	-48.7596	-32.2035	2.77898	-1.29652	7.59524	-16.3775	7.3887	-4.20252	11.119	10.8564	-33.7156
1253.23	6.80885	-0.485145	12.7078	-24.0473	-40.0829	-11.2005	15.0163	-14.3102	10.1662	-21.7938	-12.182	-42.6229	-8.30897	-6.2844	-8.11734	0.348682	-27.3307	9.39279	10.2629	2.99486	-1.84334	-27.6455
1254.91	-78.6439	30.6779	15.3175	-7.99354	-57.2923	-18.1684	-1.17041	-41.5995	-11.0217	17.942	-23.9263	-28.5271	-2.50111	-23.059	-3.07798	-12.2369	-8.7467	8.24415	-3.36526	-15.0094	3.94371	12.2973
1256.6	-194.702	6.94717	11.2069	18.069	-32.0882	-10.6031	9.82592	0.947398	-13.1933	6.62913	-18.611	-19.4993	-19.7351	-7.73902	-6.0172	-19.5006	1.41781	6.65738	-10.0359	-20.3657	4.73068	17.8895
1258.28	-118.096	57.1579	36.1428	-4.64282	-21.596	24.5706	-24.7331	-6.44667	-12.1532	-15.1668	-18.0116	24.2136	4.35001	12.1574	-9.37589	-8.94269	-40.6704	13.5408	-3.49023	-14.2082	-5.24597	34.8907
1259.96	-100.52	49.8173	18.6826	26.5708	10.4512	41.4244	-1.85092	-1.34161	-3.65355	-8.08254	-9.64763	16.6031	-15.3945	9.53035	-11.2517	19.2554	-24.2951	7.38955	-18.3241	-5.47337	8.55455	14.6606
1261.65	97.6532	36.1781	29.2119	13.2116	52.9893	32.5015	13.1831	22.9689	17.2544	-12.6678	2.55307	19.8268	8.33329	3.24653	-4.86064	19.8682	-17.9271	7.79844	-0.394972	9.52347	16.4915	5.72157
1263.33	168.538	46.5933	32.9889	-3.75955	4.13175	7.79372	-8.59293	30.648	19.6577	-0.839127	13.816	11.2242	43.2677	-10.6095	-5.18805	27.159	-24.3912	-5.05539	9.74772	5.041	12.3191	0.260717
1265.01	159.152	17.8706	10.9755	7.14406	18.045	18.8519	20.023	6.32227	22.9434	44.6509	6.29147	-9.40461	23.7338	-17.7064	-17.9062	16.9284	12.8967	17.7642	5.86313	4.84444	-4.12763	-10.8282
1266.69	74.8201	33.3622	43.5638	5.20565	6.04351	7.77618	-17.6719	-18.7908	2.62267	55.8137	12.7974	7.31861	23.3468	-33.9999	-9.20943	-13.0894	9.63292	26.6191	0.22582	0.370711	-28.2921	10.4013
1268.38	-44.5727	35.5219	20.9859	12.4921	-43.1774	-2.53569	-15.309	-21.5953	-14.0473	48.9137	-4.57787	0.0645717	1.47382	-24.2264	-15.5534	-21.0562	29.5158	24.4342	-19.0995	4.97592	-6.17498	6.81161
1270.05	-221.512	-21.8133	4.0475	11.7139	-59.5472	-38.8874	-8.04908	39.2893	-43.8931	15.3019	2.8661	5.70919	-23.7898	-6.3679	-18.1085	-27.3132	40.8957	3.23056	-35.3436	-7.59748	9.98907	9.26523
1271.74	-198.612	36.9806	24.8494	-10.5832	-33.9397	-3.00909	-30.3704	-5.57456	-43.493	24.996	-16.7313	30.4513	-37.0652	8.17587	-37.4718	-2.11067	5.78101	8.75502	-39.8668	-2.51357	11.9905	43.4053
1273.42	-172.814	14.6689	-6.16332	-4.56885	-16.7881	6.23118	-5.26751	-2.68243	-20.796	13.1631	-21.9754	7.55931	-70.8612	7.96764	-33.6912	2.08152	1.17937	5.83724	-32.2639	11.3262	7.57715	20.5753
1275.1	-61.9592	0.588412	14.7773	-3.07526	1.93545	1.05151	16.3988	3.0367	2.05713	-17.6204	-11.6318	-2.10679	-54.2802	24.4842	-2.20661	-12.0127	-21.1345	13.2491	0.911141	8.1673	-1.2051	17.1244
1276.78	-68.8071	-19.3071	-12.641	-16.3934	-40.166	-13.9625	-22.2553	28.1269	3.31755	-30.7912	9.74769	-16.1713	-9.60401	16.9541	14.6348	0.893283	-19.2017	-20.537	14.2095	-8.06332	0.649368	9.92506
1278.46	-74.4954	6.59054	-13.5767	17.019	-43.0475	34.7239	-34.5052	24.3156	-8.72799	12.2372	36.2418	-5.28678	38.2483	-4.29586	51.5497	21.4068	-3.50123	-31.0167	10.955	-18.3091	-18.529	-9.2269
1280.13	-55.1137	0.561285	-26.7572	29.2637	2.75917	22.41	-9.29851	7.28751	-24.8951	22.8541	26.2643	-9.57624	24.8702	-34.9432	41.5973	8.01452	15.0671	-22.6126	-8.35679	-17.9298	-9.64427	-6.31959
1281.81	27.3887	-25.0471	-51.9823	24.465	12.8447	27.4146	22.4979	7.51276	8.01212	12.7852	2.33121	-24.0572	7.3084	-23.2483	18.8706	6.34733	22.9297	-14.8923	-1.28628	4.86105	13.0895	-32.7234
1283.49	-10.0988	-24.2994	-32.5502	17.1207	16.0765	4.8349	-0.858526	7.79905	-12.2718	19.2285	14.6317	-8.34995	5.10752	-40.7753	3.88169	-0.411841	15.33	-21.1219	-12.9721	2.05376	4.23052	-19.1907
1285.17	103.028	34.0158	-33.837	8.11875	28.9413	27.6053	-14.5741	-10.9683	13.2823	64.6278	17.3514	-10.9353	29.1702	-23.1457	0.548714	14.0148	-14.6502	-5.66194	-9.83729	0.875475	9.39689	9.47585
1286.85	99.7752	-22.415	-56.1654	8.0711	35.0766	1.20791	19.6112	26.5548	34.5879	10.6502	-1.41597	-9.39779	-16.0518	-3.79653	2.7349	-0.178053	-6.913	4.96609	-14.8158	6.12508	6.96451	-14.4843
1288.52	63.8664	-6.43722	-25.2894	6.38863	3.89119	2.63582	10.1072	19.2309	11.9739	15.4603	4.63959	-0.229501	14.2813	30.0051	22.2325	-4.75382	-7.33236	10.5148	-15.6613	2.18778	10.2006	-7.32294
1290.2	100.71	38.2578	-19.6877	19.5794	-2.01377	19.0391	-25.8368	6.59071	-10.7542	50.695	23.4498	8.48481	35.5442	29.5571	11.4685	9.16206	-17.4722	13.5167	-19.2537	-3.74807	10.3945	2.05743
1291.88	-8.87506	93.2705	-18.2806	40.718	-6.37915	69.2008	-30.1042	-37.308	-12.6744	62.9001	11.1457	22.8044	23.214	15.8431	5.82208	16.865	-7.35276	20.1631	-22.8521	-3.76154	-7.30163	-2.86218
1293.55	-4.38079	38.7522	-37.4201	31.9256	61.0987	42.815	11.7142	-42.7155	-6.43607	33.7952	-13.0463	10.1688	-32.4984	10.3353	-28.1763	0.528987	6.30674	26.7721	-23.333	4.39174	8.58093	10.4504
1295.23	-73.804	49.317	-23.345	20.5476	54.5989	48.7204	-9.18085	-58.9548	11.253	-1.34443	-28.1353	12.3019	-58.8813	16.3753	-39.5512	-12.0166	-5.58328	24.585	-27.4733	15.5692	0.525982	15.5534
1296.9	-110.222	12.8057	17.3805	-21.1938	5.19937	6.83404	-32.5559	-23.0022	-22.1657	-31.9384	-7.37288	14.6085	-45.3806	11.0135	-21.4195	-0.0550664	-3.70049	-10.5623	-15.0315	10.9059	-16.2168	5.7039
1298.58	-78.2395	-23.7204	18.5194	-39.6154	-20.7194	-22.8701	-18.7702	49.7807	-13.6704	-64.8896	9.22583	12.1573	-16.3455	19.5954	3.28952	2.48408	-2.90451	-26.4768	0.205622	1.06143	-1.5149	2.45745
1300.25	-25.2638	-62.2781	3.94387	-43.0366	-11.0505	-39.5556	3.95203	71.1776	-1.41243	-64.4853	6.86944	8.97783	-16.0495	4.16711	3.61877	5.17916	8.40103	-33.0012	9.18717	-4.62352	3.85117	-4.42057
1301.93	73.1263	-24.2259	-4.62816	-20.9481	5.94109	-24.1892	16.084	12.625	0.910426	17.7256	4.48183	-16.3207	26.2852	-14.7328	9.11761	-6.98049	3.9747	-7.37433	11.6487	-4.52766	9.79058	6.5354
1303.6	124.604	22.8691	-22.5511	6.83622	42.9577	-10.5467	15.3249	-20.4147	6.26099	51.9746	17.363	-8.75758	19.261	-30.8204	-6.51574	-1.06512	-9.63259	2.98463	4.74842	0.580355	2.76869	17.4486
1305.27	53.7513	7.69137	-48.5363	22.6572	25.9921	2.08168	31.5588	-47.9193	15.8915	43.8489	-2.12485	-21.7956	-3.45216	-19.545	-19.1567	-8.24334	7.48097	16.0364	9.23219	2.2337	1.8905	-6.12027
1306.95	88.6363	-40.8707	-43.068	7.8518	19.7315	-30.1643	20.2199	9.53448	24.6109	-22.7541	12.4446	-23.1588	11.4787	0.538692	-5.38919	-15.2872	-4.33547	4.15855	25.5976	5.33205	2.69431	-22.8527
1308.62	13.9139	-12.7761	-28.8615	12.9653	-5.39278	-3.59099	0.85025	4.35649	-4.14809	5.27932	20.1859	-14.635	12.9968	12.2523	2.80953	-11.0628	-7.35445	-7.85804	3.77222	-4.46645	-6.36872	-17.2515
1310.29	-8.43299	-14.2684	-5.81925	-1.75799	-42.3164	17.1798	-3.03535	16.9417	-23.8579	32.9649	22.9548	-6.16195	21.0516	33.1581	12.2091	9.13339	-2.8514	-9.3867	-0.666542	-11.1343	-8.79349	-27.457
1311.96	-31.4859	-23.0083	36.7746	-17.8957	-42.93	17.9066	-15.7803	38.6919	-31.7085	0.480111	18.6118	19.1269	9.32067	41.5516	-3.71355	17.7259	14.0545	-17.1226	7.86928	-5.12325	3.79829	-10.2726
1313.64	56.2558	-43.4296	33.9715	-28.4216	-26.7378	6.14104	-23.8304	21.6255	-18.9158	20.0287	18.3295	9.78023	21.4914	22.7299	-14.659	26.3553	8.74985	-11.3931	10.1742	4.48138	2.11043	0.842825
1315.31	48.0653	-18.4071	34.4319	-26.8198	-17.6967	-7.71175	-28.8707	-18.5379	-0.960603	26.2226	-1.0345	-0.353914	17.8599	0.309651	-14.5539	21.6252	-0.825877	7.36423	4.56999	3.84995	0.808338	18.4548
1316.98	19.9089	11.541	49.6159	-24.3817	-9.23612	-18.5596	-37.3532	-5.49085	-5.6122	-21.4295	-3.63797	19.7594	4.78546	4.92959	-2.51555	13.386	-5.12605	-0.0871485	-2.65529	12.6991	1.58418	19.4978
1318.65	-51.2993	-1.29032	40.4005	-10.0027	-24.4119	-30.0773	-17.902	-2.51209	-6.60071	-25.6364	-10.8369	2.72234	-4.24325	11.7984	4.0183	-2.77112	-4.91165	9.50278	0.801763	7.51963	0.096326	3.1069
1320.32	-5.73596	11.374	49.153	-16.1481	-17.0725	-29.2089	-19.2951	5.84919	-3.31763	-25.1662	-7.67285	7.65056	1.59411	-11.0038	5.53118	-15.2594	-17.0287	9.00249	15.0538	13.341	-12.0214	1.11299
1321.99	-52.4893	31.2723	40.1832	-0.205031	-9.95854	6.31382	-16.1588	-12.8764	-14.2629	7.18765	-7.3029	7.90578	6.81655	-13.9265	12.0344	-14.698	-14.1319	-3.09897	15.2762	8.3277	-13.5903	5.95452
1323.66	-79.3444	44.6618	25.2014	11.2723	-20.454	38.4385	-18.8962	-13.2581	-9.78866	9.71782	-5.89604	13.4625	13.1772	1.0711	20.1599	-8.85846	-9.71531	-5.93845	15.2956	3.87606	-15.8994	-3.44612
1325.33	-147.053	29.3771	20.5272	3.97948	-39.8711	26.7438	-20.3506	-4.45243	-8.92832	-5.55096	-11.4328	5.71539	-8.25379	2.70405	9.91716	-2.41886	4.93556	-26.779	11.7875	-4.25529	-3.32945	-3.08759
1327	-116.426	0.754865	17.2409	-2.97087	-45.5585	20.4328	-21.8891	-6.72392	-3.17568	0.00660648	-2.32225	-1.1896	-0.384311	0.225981	13.9758	9.87031	5.52382	-20.4467	12.9011	-6.75754	-11.3346	-3.83123
1328.67	-117.359	-5.93844	5.08232	-5.44765	-54.9431	4.59341	-21.2382	0.811078	6.66731	-23.199	0.930806	-0.843505	-5.42739	0.813496	23.2752	12.1897	11.0731	-21.3197	5.60741	-10.0259	-4.66286	-7.6618
1330.33	-29.3495	-27.7767	-14.135	-6.1053	-3.60341	-26.7507	4.87071	18.162	22.2472	-58.6221	-5.79118	-6.74915	-22.1817	10.6325	9.42123	-0.645808	16.1592	-11.5396	12.5965	6.98565	4.82735	-18.1467
1332	25.1269	-35.7772	-17.0541	-1.31069	19.5849	-35.0981	34.2	17.0409	22.6064	-29.9374	-9.60619	-23.4747	-17.8256	10.082	-1.309	-2.81725	9.58929	-3.75566	9.98974	3.52668	14.363	-17.7723
1333.67	103.469	-14.3273	-0.634929	-13.881	29.7802	-15.0625	33.4546	-0.804048	6.83967	-0.780752	-12.4111	3.60262	-6.55771	0.0791616	-13.4561	-1.29289	8.42649	-1.51881	9.50196	1.39847	8.51677	-3.41207
1335.34	109.212	-8.04295	-10.5061	-17.8235	23.7229	-12.2568	25.4481	8.82204	3.89549	-15.7507	-10.9367	8.1673	14.0343	19.4004	0.685386	-9.43205	0.405941	-15.7223	9.57984	8.47586	16.5247	-2.21863
1337	59.6361	9.74998	-3.65457	-6.82258	32.7735	5.2967	27.2652	-0.744797	-12.595	-18.7227	-9.01933	14.2304	9.947	21.8194	6.09174	-24.9557	-13.3591	-11.3262	8.33671	3.06884	10.2407	-3.08649
1338.67	-31.4182	25.5006	-0.435125	11.7239	21.3015	11.8653	36.6865	-25.2051	-5.32473	-15.2445	-23.0133	-6.16577	-14.7181	11.4173	-5.4323	-23.07	-11.6159	3.16229	2.35475	-14.5718	11.2144	-2.74649
1340.34	-39.5119	15.7078	6.33619	24.4398	24.3432	-2.17988	21.8634	-17.8918	-11.4138	-22.7641	-4.69203	-10.3277	-13.3309	1.95928	16.9901	-23.1976	-23.8255	18.7279	-11.1225	-24.5449	-1.80886	8.60582
1342	-31.5644	3.471	-2.61261	22.3276	9.36559	4.17116	20.6506	-3.74038	-9.61859	-10.3753	7.09695	-8.34001	-6.59665	9.61486	28.9057	-8.54124	-10.4748	21.4778	-9.27819	-22.2115	-7.13703	3.80263
1343.67	57.9175	3.52767	18.437	-1.59231	50.7477	-21.6149	11.711	-8.48218	6.4338	-35.048	-2.47286	1.40909	-8.71451	-12.4686	-2.35814	-2.87624	-11.0155	27.1051	4.92404	2.86718	-3.95674	9.67266
1345.33	83.5482	-3.82389	5.35102	-9.97805	32.4113	-26.3586	-2.58591	0.164392	13.4505	-24.2364	2.59934	-11.3028	10.0029	-11.2478	-4.72844	8.39497	-16.4516	13.0898	9.54238	6.48778	8.57782	6.80313
1347	41.9168	28.2283	-3.4272	-5.94274	3.33799	-1.13552	-14.4	-9.67482	-4.92054	17.2336	13.7786	6.06709	32.6776	-10.7985	0.463665	16.2779	0.675034	1.11917	-9.67285	1.56717	5.83158	13.1318
1348.66	61.2468	36.4129	-33.5545	-4.67895	-18.3907	-16.2949	-1.27451	11.0435	4.01	-7.85512	4.33217	-4.77643	31.2005	-2.58319	5.39449	1.10598	-2.49673	-15.8564	-13.0361	4.79377	16.4706	12.7644
1350.33	21.974	44.7676	-23.3991	9.63265	-6.38551	-8.65704	7.41319	-13.6483	-2.94807	-10.0112	-11.9189	5.10729	12.4101	-15.9398	-17.9216	-17.1902	-1.18843	-3.86457	-7.71961	-1.46581	2.18912	17.7594
1351.99	67.1872	9.3153	-32.6087	24.8092	9.29816	-17.3122	32.1701	-14.8226	15.8276	-26.3754	-15.4051	-15.8861	1.75921	-14.3653	-18.2687	-22.7846	5.12932	20.0188	-4.56696	-9.35157	-0.534324	5.07169
1353.65	-1.29614	-31.3177	-25.5318	6.71404	-27.1442	-46.1977	1.12031	34.9993	5.45169	-52.603	5.87037	-3.18647	12.5934	-6.56396	5.7571	-24.8516	-0.409845	3.87035	-19.8547	-11.9484	-6.76375	7.28344
1355.32	-10.2538	-45.6542	-8.06155	5.59902	-10.0066	-38.064	17.856	41.3828	6.04497	-50.1035	-3.28523	5.04785	4.26671	-5.59829	-1.17348	-23.7231	12.5977	24.4819	-11.4627	-3.44459	-11.1864	-2.2521
1356.98	7.31424	-49.983	13.0764	-4.47737	5.05517	-30.418	20.2232	36.5817	8.31393	-50.6661	-10.0965	25.0959	-10.4283	-1.90782	-18.4842	-7.73865	8.51682	21.603	-9.62777	9.45276	-8.32965	-4.54573
1358.64	54.7318	-30.9085	22.1818	-12.644	10.8332	2.82496	8.6594	15.2275	11.6001	-30.5134	-12.92	19.5557	4.5105	-3.48188	-13.5865	-5.74564	-10.2462	12.0038	0.474834	12.4616	-4.55177	-8.74597
1360.3	15.8508	-21.6886	-0.618905	5.22048	6.87599	22.4598	26.9226	-1.9014	5.03401	15.6159	-15.8381	12.0779	-2.19057	-4.40877	-10.5666	11.8143	18.0501	5.72869	-11.8314	6.80474	-0.717401	-15.8278
1361.96	46.2656	-23.6542	-12.716	11.6725	0.225145	5.62062	35.2236	13.4472	-11.3256	12.5003	-20.8759	6.34897	-11.5759	-18.4056	-1.05622	10.3923	18.7991	-9.01401	-8.43202	4.70738	8.45134	-11.8057
1363.63	43.4575	8.14509	-10.7114	15.6589	-5.00929	18.269	27.3087	-21.4498	-2.15665	41.6723	-29.1729	-4.41603	-9.58069	-13.789	-8.81353	16.5205	11.3528	7.22688	-2.81562	-0.309321	6.64947	2.22001
1365.29	41.2893	-1.95068	-8.65872	6.98758	-15.9474	-6.80794	21.8726	5.19969	-5.82386	12.5052	-11.1234	-1.2371	-9.90589	1.67201	0.838907	10.982	3.09488	-3.23755	7.65018	-4.37521	4.97498	-1.8895
1366.95	-48.3413	-1.25846	2.67022	-8.74751	-20.3921	-4.40696	-20.6021	12.7114	-19.1221	11.3632	0.786906	9.81369	-4.92528	-2.65518	-6.44394	9.96892	6.52702	-12.2653	4.94975	3.08676	4.18067	17.6274
1368.61	-34.0879	-31.1697	1.0004	6.2688	34.0419	-7.19854	-8.73436	27.1552	-6.48108	-11.9303	13.6828	5.26465	-16.3576	1.73116	-1.78044	5.99745	8.78166	5.4551	10.4974	5.62277	0.246736	3.88796
1370.27	-76.9428	-13.2633	9.36836	2.85652	24.2582	22.1254	-20.4345	17.6624	-3.12394	11.774	21.3506	12.0871	-12.9229	37.858	0.18969	11.8576	-3.72486	5.69079	1.03358	12.098	-5.57311	-12.7951
1371.93	-61.6334	2.3752	21.4741	2.90792	7.02479	41.8718	-22.3296	12.6257	-9.74938	32.5376	23.7662	12.3637	19.147	39.6832	15.0741	5.71822	-10.9768	13.5571	2.98994	8.19051	-10.9937	-23.7175
1373.59	-121.379	-8.50881	-13.8818	14.4846	1.1655	37.4498	-3.75846	1.84944	-9.48946	71.1949	14.9118	10.9639	12.2468	17.9144	12.2703	11.5474	25.8344	15.1617	-27.9537	-2.20032	-12.5147	-10.9826
1375.25	-63.186	-15.6687	-3.42582	21.3533	12.0179	5.08302	9.59567	5.9953	-15.9534	65.2845	11.6615	-4.866	10.4031	-3.01963	11.6089	4.5043	28.2419	15.3897	-20.5446	-0.655856	-2.69736	-6.16567
1376.9	-28.7896	26.6118	0.569016	15.9565	-15.5537	16.4967	11.2314	-35.5014	0.866272	57.3925	-1.8364	-4.88104	12.8261	-14.8668	-5.53733	7.10497	17.1619	17.8435	-15.6399	-8.44947	-9.34264	13.1915
1378.56	17.3665	16.2363	5.87444	3.67773	-12.9973	-5.59835	30.1498	-15.0539	-7.72947	28.4041	-6.09573	-1.41589	2.26674	-23.4394	-16.0703	-5.72827	5.94337	-7.9868	-6.48038	-14.0702	-4.69077	21.8753
1380.22	50.8424	30.8872	12.5099	-12.6457	-16.6004	17.4374	-1.98001	-31.1544	-19.351	34.9311	-0.859184	-4.37094	16.9137	-29.3826	-18.1419	-0.78003	-0.706931	-30.8594	4.0531	-15.1082	4.06788	48.472
1381.88	64.7162	-3.61537	19.4648	-6.38181	-3.06346	34.5786	14.8008	-25.2247	-6.57168	27.4912	-0.323671	-15.6216	-2.10657	-10.9997	-17.5416	5.46021	16.3618	-24.6677	6.04205	-8.83583	1.61379	22.4759
1383.53	10.2639	-0.565947	12.9119	-5.44643	-18.3366	26.4778	4.58018	-26.4419	-2.19424	34.3401	-11.9595	-19.1086	-19.7999	-7.58763	-18.4982	-7.83541	17.1113	-20.9711	-0.235968	5.25602	-2.95199	-8.93056
1385.19	64.7556	-7.2998	1.56788	-14.1331	-33.1836	-0.452889	1.17413	-5.71079	17.9249	1.92995	-8.15804	-20.8402	-3.182	-2.50131	2.77208	-11.336	0.436932	-11.3616	15.026	11.4055	3.46054	-21.7223
1386.85	65.2312	13.1048	-0.12851	-19.0122	-23.4912	-8.86959	-9.14181	-2.48223	10.379	2.57805	-1.34851	-8.62853	7.30174	-20.9103	10.3128	-4.30583	3.17142	-7.60604	-10.7344	11.563	9.58661	-0.319059
1388.5	47.6457	-34.1687	4.84456	-18.6161	17.0484	-35.7986	-7.26378	25.6995	11.1559	-42.0217	11.6162	-20.7204	0.3599	-26.1935	29.0443	2.92438	8.38777	-3.84051	2.05313	7.51379	6.44967	-20.1064
1390.16	15.1229	-34.09	4.43951	-23.1414	-1.88745	-29.2874	-24.7493	19.5799	8.23291	-72.6804	28.1286	5.07966	8.18494	-33.5793	22.5086	12.8193	2.21701	-13.102	16.8837	3.65574	-13.7693	-25.9534
1391.81	46.9816	-49.2267	-18.8835	-24.1066	15.9598	-17.1258	5.63507	34.1719	2.00246	-36.0642	33.8694	-10.4989	4.16129	1.01489	18.0787	18.6153	-4.51787	-14.7054	24.7213	-5.17217	-4.15109	-32.5532
1393.47	67.8168	13.2878	-13.8104	-40.8094	13.1578	9.57905	-19.1191	-8.09224	-13.9145	-3.32468	33.0628	-0.323047	26.5822	5.40999	8.32575	22.0752	-31.8318	-22.5148	19.325	-19.0961	-5.74441	22.57
1395.12	-94.7126	12.5718	-3.0783	-16.6617	-19.3702	42.1978	-24.3333	-27.1788	-7.61645	13.3952	17.7074	16.1993	19.6811	17.1428	-12.8333	18.6921	-12.2942	-7.93197	9.43809	-8.4465	-22.7123	7.96054
1396.78	-110.767	40.2005	4.4825	-9.63699	-12.308	38.0656	-30.4679	-50.6875	-1.53701	-2.15937	-16.3528	31.9034	-8.5361	3.68594	-31.2277	-1.70883	-11.9373	-10.8113	7.49858	-3.04033	-16.8064	16.1551
1398.43	-43.465	38.691	-33.7402	18.5604	23.192	0.482678	3.96843	-63.8376	26.0873	-2.28508	-32.5827	5.7414	-48.2186	2.99728	-35.036	-10.1811	-18.0381	-3.48405	-3.92369	4.61069	15.5078	27.9855
1400.09	13.2504	35.8205	-23.274	14.5454	9.53448	-14.3138	3.18667	-36.8866	30.0809	2.87889	-20.999	-5.85755	-21.979	1.21015	-13.3279	-2.88286	-15.6081	-4.64566	-13.1986	-0.331947	21.6417	18.9273
1401.74	-43.5546	-7.17726	-9.22929	14.1474	32.558	-15.2428	-4.50685	-19.5148	24.3168	5.48729	-15.4414	0.358252	-31.2072	-16.2559	-5.28309	4.5401	1.11063	2.5432	-22.9994	-7.32651	4.54378	11.2252
1403.39	-59.5382	-34.7811	-16.3149	22.2374	19.1877	-36.296	-0.403255	7.98799	25.7194	-5.53535	15.3309	-11.3438	-21.5487	-10.6352	5.32203	4.12313	-0.895876	8.55917	-8.11363	-1.08318	6.41498	-9.95145
1405.04	5.56852	-20.08	-16.681	10.2341	14.3706	-21.8063	-10.313	-10.452	19.9048	15.6056	14.3524	-11.9065	-30.4597	-11.9029	4.46349	18.4878	3.59622	16.353	-0.247874	-5.4181	-3.59571	-3.45434
1406.7	110.369	-2.46382	12.7141	-12.2581	19.1664	-20.5727	-23.1345	-26.1364	26.9062	-1.83089	15.2602	-17.5614	2.74972	-13.4331	-9.40807	11.4201	-21.4631	24.7956	20.8581	-4.01162	-3.84123	20.0542
1408.35	-2.0031	10.7	5.88632	3.89679	6.88148	-6.72717	-32.1217	-3.9925	20.9198	-23.4574	7.98622	-1.75982	-8.11838	-12.6673	4.92597	5.0382	-21.9437	7.62155	10.6761	3.43772	-2.01279	-0.801604
1410	8.50538	6.56567	8.65344	13.6846	39.7347	4.56379	-9.93318	19.1708	-0.193433	-23.2558	8.73306	11.3597	-14.537	5.43196	13.9984	-13.2737	-23.6198	5.71471	4.90836	14.8132	8.70195	-1.60181
1411.65	-48.7651	-15.5766	-10.2732	23.5893	17.7457	-35.908	7.38786	55.9342	-17.4035	-24.0436	14.8467	8.15862	-25.3972	17.5279	19.8131	-15.8758	12.382	-11.5446	-17.2578	15.0159	21.7777	-8.16337
1413.3	-67.8413	-21.3543	-13.0272	3.6363	-31.3377	-46.2333	7.73501	71.7714	-16.494	-23.0265	18.7558	8.95806	11.9273	38.3128	35.1197	-7.32725	17.3349	-11.1582	-16.6305	7.56137	12.0037	-24.8225
1414.95	-41.2958	-18.5435	6.17688	0.363349	-5.72357	-3.09396	13.9232	44.5093	-23.6318	34.0984	15.7085	19.4043	11.256	25.8305	15.534	2.44535	22.5496	4.16004	-20.3447	9.60805	-3.10201	-10.3324
1416.6	-102.007	-14.7457	24.4147	4.32375	-30.5978	-2.07871	7.11423	38.4161	-22.2038	25.6759	24.6307	18.3189	30.9603	15.2062	29.4843	-2.64858	13.614	15.4327	-16.2271	5.48685	-14.2156	-3.64916
1418.25	-89.0235	2.4079	9.5689	-9.55139	-29.0267	4.29376	-13.1577	-26.7267	6.34614	16.5271	-6.15692	10.8563	-2.73477	3.54416	3.3215	-0.859982	1.32098	28.109	-4.11303	3.81024	-32.8191	3.80091
1419.9	26.1545	-8.37069	12.4677	-20.8334	-36.6215	-0.382146	-12.421	-24.9353	24.3163	-6.06079	-13.0334	-19.727	17.7157	6.47115	-23.9779	-3.10081	-7.85053	18.6794	28.1134	0.530155	-15.0596	-12.03
1421.55	73.7816	12.6759	-5.81351	0.182474	32.861	10.166	13.9005	-45.6589	38.8196	-21.0861	-47.2408	-27.6919	-28.8189	-6.01084	-24.3243	-17.7381	-27.4139	24.2174	23.4602	9.81043	4.20041	-9.39934
1423.2	99.4412	13.3688	19.7102	-13.1093	34.8001	15.7247	1.65178	-20.1931	17.9988	-35.5857	-30.9422	5.08758	-13.0645	7.11052	-19.3548	-6.05492	-16.5492	8.39251	22.5646	9.34271	12.5547	-5.20053
1424.85	79.0919	38.013	15.7834	-6.17794	-1.41029	4.44575	-2.94712	-35.9205	-0.467515	-3.47271	-37.495	0.841092	-0.0260808	-11.431	-20.3611	3.85807	12.9055	-3.89465	-1.83859	5.33781	23.8803	-1.57501
1426.5	81.7557	2.8481	-1.18596	-11.6395	-18.6694	-11.0849	4.06757	-0.117412	-12.7378	-17.7969	-18.5949	1.94892	15.8487	-0.279591	5.89459	5.86287	11.3326	-21.0828	8.00573	-9.57774	26.983	2.02199
1428.14	125.111	1.89926	22.4688	-13.2601	0.725423	35.7266	3.29235	-5.05845	-17.7024	41.687	-3.39752	12.1022	25.9348	-7.45155	5.18817	15.8507	19.5913	-21.7462	14.8606	-13.0324	15.7016	18.1047
1429.79	6.94707	14.8842	26.8039	-7.12383	-48.9282	38.9683	-10.8906	4.70167	-14.8717	37.3579	-5.01009	11.6837	34.3874	-18.9432	11.7763	6.21447	10.2762	-16.4751	-0.495696	-15.6133	7.27917	8.20044
1431.44	-128.543	27.1349	-17.6032	6.07915	-61.4467	37.689	-9.23173	19.9321	-12.3546	34.5298	5.15423	10.5751	-1.39249	39.5203	8.92617	2.91771	3.14485	-3.08562	-10.0177	-16.7999	-5.01425	-23.6956
1433.09	-93.7429	19.7267	-29.2257	5.10301	-36.5788	0.736752	-5.12601	22.1239	-8.9965	26.5317	6.43079	-5.56845	7.86045	27.8832	-8.97552	-3.32912	17.8074	-2.6789	-2.23085	-10.8842	-1.26564	-19.6548
1434.73	-38.3867	2.561	3.02874	7.23888	-1.48823	-4.31748	-9.60322	24.3264	-12.3374	-24.8772	14.9002	2.12295	13.6196	20.3497	-2.12924	-17.496	2.03118	-6.1789	1.33642	-4.17389	-1.01325	-9.72767
1436.38	-5.22269	48.6567	18.5657	6.45765	8.69773	14.9856	-21.5587	-0.197524	-25.6086	-7.56685	20.5916	14.3911	14.2348	10.3471	-13.0738	3.99975	12.5308	-6.28559	-8.92877	-5.75771	5.84174	7.80435
1438.02	133.928	25.2879	-9.21306	7.12751	26.3683	8.06103	11.5911	-11.3772	-15.2858	24.3624	-0.186447	-5.88611	15.1337	-2.34028	-17.5476	7.13959	-1.07829	-6.7487	-10.1243	-2.45621	11.7387	-0.932106
1439.67	154.228	-6.68009	13.4326	-11.9207	14.3668	-32.8938	2.98719	45.4901	-11.7101	-46.0336	3.13902	6.98464	23.4698	16.7685	6.60475	-9.62017	-16.4272	-20.3911	10.7137	4.20229	10.0381	-1.70145
1441.31	98.8606	-15.4875	-0.788683	8.79438	38.7896	-22.9687	19.4296	19.4495	6.43236	-13.6525	-1.64944	-13.3746	-6.68432	-2.20964	-1.3712	-10.7467	-8.96623	-3.83984	-12.6916	10.2251	11.0985	-1.22406
1442.96	61.6973	-13.2224	-9.25658	14.7099	18.86	12.6552	24.1014	-4.7452	21.1641	16.9404	-13.0273	-21.2046	-6.11681	-12.9083	0.744973	-2.04891	5.37756	-1.57168	-13.9273	0.788688	7.24138	-5.86352
1444.6	-108.119	25.6196	2.39663	21.0883	-18.5177	39.0512	-8.04686	-9.46161	12.0269	6.78979	-4.75499	-10.0095	9.96555	6.77244	18.513	-4.91302	6.7565	-8.15777	-15.6885	-12.1733	-10.9665	-11.005
1446.25	-114.526	-10.0263	-3.30622	17.8937	-3.36791	5.05268	-9.2066	-19.7793	19.3396	14.5246	-3.16791	-15.9483	8.83792	-21.6104	16.8146	-17.6112	13.5759	9.29263	-9.98791	-11.4724	-19.3911	17.3771
1447.89	-96.8853	-37.1185	9.39236	7.23738	-29.5664	-8.97978	-23.0194	12.365	4.58145	-24.5464	5.19403	-9.44183	20.9117	-7.87837	18.1273	-17.4399	5.34548	0.277952	-0.77297	-8.80853	-16.2068	6.38766
1449.53	-54.9993	2.74744	-9.2903	8.003	-19.2024	7.82634	-17.0034	-9.11809	3.74616	16.679	0.266631	-9.91075	9.42153	-11.8608	6.82977	1.37438	6.87834	7.10969	-12.6914	-3.31955	-8.2976	12.9273
1451.18	30.2058	-10.9606	-33.8549	-14.0113	-10.202	-8.80946	13.9758	-5.98571	20.6526	-16.602	-29.2955	-19.8798	-10.2562	-4.03443	-20.782	0.946479	-11.6299	-0.299095	2.24395	-0.532808	6.4954	-7.57066
1452.82	65.7299	4.32437	-8.36875	-14.9497	-16.0465	-11.2877	4.0977	-0.962923	16.7583	-24.4103	-27.091	-15.1407	2.38051	11.4467	-27.0266	-7.31143	-14.6819	1.1143	13.5435	1.25383	15.4566	-1.49498
1454.46	90.152	-14.941	-5.37322	-5.06382	27.1304	-12.297	16.1935	9.1135	-1.38155	4.94919	-3.8027	-6.1758	-4.10693	12.8293	-26.2557	-7.12779	-8.09148	7.28705	10.542	7.52051	10.199	-5.68144
1456.1	113.681	-13.2987	-3.37772	-4.12299	41.4997	-13.091	10.5059	21.5803	-7.05586	-9.50337	9.85952	10.8725	4.04664	0.224753	-20.6303	-7.24471	2.46959	-8.37704	18.7444	5.50841	10.4634	-7.05623
1457.74	-24.006	-9.54408	-3.63349	-1.22295	19.4593	-25.9136	-6.14582	38.2043	-13.4093	-48.6227	19.4936	2.16469	21.6916	-3.54342	10.6308	-18.5676	-8.30655	-19.7458	12.5773	1.97407	2.29704	-19.9664
1459.39	-33.0579	-29.3272	3.70121	-14.0995	-6.20979	-29.8057	-19.5381	52.4337	-29.1222	-30.2413	36.8356	24.4365	37.9603	-10.1581	32.4763	2.3074	-0.841247	-13.1829	10.0443	-1.56966	-1.52683	5.83174
1461.03	-21.4435	-18.1989	20.9197	-18.2543	-4.41377	-23.7127	-32.7396	58.4172	-19.2691	-54.7798	23.9426	28.8817	23.885	-2.48101	37.3231	7.66313	-22.4184	-16.6482	32.3642	6.72969	-13.0159	-12.0967
1462.67	-68.5285	5.72991	1.74553	-8.90476	1.5163	-19.2716	-20.5364	28.2892	-3.5273	-30.3984	1.9895	23.4128	-4.45778	-23.3997	35.1947	15.3327	-16.3273	-10.2783	14.2354	5.40293	-11.2187	2.07148
1464.31	-110.468	19.9218	-4.04481	5.52986	-18.1801	-1.87053	0.513585	0.717607	3.3757	-31.2609	-22.8289	12.4458	-23.2214	-16.5546	20.4239	22.3521	-11.4902	-5.15172	15.734	-0.0234302	-0.314711	-2.66612
1465.95	-111.539	34.7824	10.0867	9.68736	-40.416	45.762	-24.4462	-25.1082	-6.13134	13.8359	-19.3739	18.3886	-4.17817	-7.1355	-7.71153	23.515	4.58138	5.60936	11.7979	-5.93668	7.41893	15.5153
1467.59	-16.5013	7.95412	44.886	-14.4782	-15.1091	32.3735	-41.3622	-2.56701	-29.6455	30.0969	-4.81626	39.5298	6.14672	-3.46421	-8.99979	22.7221	12.2698	2.50559	17.2813	11.0239	-11.9165	14.0066
1469.23	50.8798	-10.1215	18.11	-14.0294	7.21176	-8.19681	-19.6803	8.60203	-13.9819	11.5392	-3.68845	33.9135	-1.4274	-14.4801	-18.6994	19.4721	22.1858	8.7624	0.0408683	14.4565	-7.97715	10.8299
1470.87	14.078	0.716	1.00427	-5.46251	22.6495	-10.8262	-14.2064	-14.0059	3.54191	-8.71518	-9.99998	3.6271	-11.5738	-10.7071	-23.1222	2.58281	2.24006	12.975	-3.64991	12.2721	-13.7341	-1.2116
1472.5	66.2619	18.1884	6.38703	-7.49375	13.0351	8.98271	-8.55888	-18.4294	7.92991	-2.72995	8.30738	8.72454	8.07836	-9.81409	-15.6269	-2.52637	-7.56978	9.57637	2.49601	4.34681	-16.1613	2.78691
1474.14	82.3171	5.38977	-10.1084	3.33181	26.8028	6.93206	12.4654	-5.00584	30.2029	0.571583	14.3566	4.46482	-6.9782	-1.33183	-4.68349	7.36663	-24.9562	-4.62221	19.5439	2.58608	-32.2153	-14.0611
1475.78	55.0632	11.8071	-19.0212	14.1673	60.1043	13.4532	21.014	-27.9882	21.9633	16.622	2.28212	-7.83089	-4.45127	-14.0618	12.4106	2.03536	-20.996	6.06998	-5.32872	-3.46454	-10.5027	-2.9521
1477.42	14.05	-22.5408	-29.2699	34.4838	39.0114	27.4631	31.8919	-14.7445	8.88555	55.5838	24.7765	-10.1715	12.0488	-5.61125	39.5827	22.4553	0.32296	15.9407	-7.79998	-10.4961	-5.39076	-10.0152
1479.05	-45.8395	-63.9587	-4.38194	28.7444	49.5808	28.7089	17.4196	-9.2075	6.29022	9.6719	12.5304	-7.76998	-2.73233	2.04671	23.4776	16.0687	27.1505	7.51616	-2.26027	-3.4902	1.62232	-22.3685
1480.69	-93.4147	-56.5057	32.1975	26.8657	74.9203	31.6027	9.66926	-26.1374	-17.2273	27.7752	-1.02911	11.022	-13.2853	0.662783	11.3928	7.65889	29.5412	12.5112	-11.2245	19.97	-10.0976	-13.3792
1482.33	-101.964	-72.9683	-8.74657	33.276	36.7205	-12.9514	31.2636	-9.42341	-19.7514	25.4533	11.3568	3.12047	-12.2546	5.18298	27.9278	3.61273	19.7509	16.057	-23.8244	8.78006	2.83291	-1.72195
1483.96	-131.063	-13.0253	-14.738	37.7926	37.6336	-21.4458	-8.48298	-32.9202	0.804865	-13.3268	4.21467	2.11538	-35.0425	-7.22734	2.15534	-16.1588	-10.4639	16.5702	-8.80465	24.0478	-13.0918	1.47348
1485.6	-58.2507	-11.1783	-29.7412	32.1303	43.7129	-34.4689	23.0052	-28.0729	10.4224	-21.4701	-5.08786	-14.2751	-40.3186	-4.1511	0.045932	-31.9756	-7.97661	14.1545	-8.73969	29.8799	-10.1955	-4.52702
1487.23	35.3944	-28.2836	-44.8048	8.09018	15.9754	-53.0677	35.0858	-15.7791	9.75208	13.2439	-5.00489	-28.305	-27.8237	5.35282	-5.67494	-13.2009	-12.3453	19.9983	-22.8836	24.5816	-11.2149	-8.57628
1488.87	29.4576	-15.5704	-35.1401	-3.68066	-38.0533	-23.0163	3.20251	-5.63686	-10.2725	38.4995	2.07324	-25.0182	20.5797	12.2583	9.53479	-8.13624	8.79092	17.4942	-35.2	-12.5697	5.86588	4.02869
1490.5	61.5928	-10.0301	0.972331	-29.4628	-38.4017	1.53106	-12.1692	17.8646	-3.8728	33.7116	11.4587	-12.1474	23.3931	15.3078	21.1488	4.71344	13.0047	-3.89354	-23.0132	-14.7083	5.87312	0.173691
1492.14	99.9045	-17.929	11.2221	-32.6326	-4.6567	-1.39045	-23.482	-2.59998	1.63086	5.01045	2.32589	-5.73798	3.0989	-5.40489	0.281662	-8.73334	2.53543	-14.364	-3.02281	-10.6496	2.96416	10.7017
1493.77	38.8554	55.0931	26.727	-32.9528	-3.15457	41.8675	-19.7216	-58.3057	-0.930667	42.4526	-31.2368	0.281996	-10.9847	4.73748	-23.3372	-1.47707	-25.5159	-4.23071	-6.79396	-8.92961	5.21275	26.0344
1495.41	0.30782	53.637	22.2238	-40.1641	-50.3836	6.59344	-29.5863	-13.8599	-5.68846	18.1273	-10.822	8.48831	8.5356	14.5922	3.80223	6.59893	-38.9775	-20.1054	-4.80487	-10.4779	11.8877	29.709
1497.04	13.4557	29.3352	21.2353	-28.9794	-16.3274	-10.8503	-21.9444	15.3505	6.64326	-25.3757	3.58589	7.23766	-2.22447	-3.32883	-2.98277	17.1666	-25.0136	-22.1889	6.24893	2.84949	10.3929	7.10156
1498.67	114.648	20.9799	18.45	-38.8873	27.0419	-26.4792	0.715755	5.51024	27.5064	-45.016	1.40982	-12.3012	6.05223	-4.74976	-12.3521	19.7747	-36.4264	-16.0269	24.2342	15.8867	13.8343	15.1628
1500.3	164.824	42.9241	-3.4512	-35.9461	4.25396	-34.772	-16.2529	1.62933	13.4608	-39.6624	0.311346	10.0257	23.9168	-4.58915	-15.0574	24.9323	-38.7928	-1.70317	18.8464	-0.675991	-6.01523	21.019
1501.94	68.0071	45.8387	11.2485	-6.60572	-21.1147	7.01372	-18.9779	-12.8455	-3.29179	14.7452	1.84313	-1.96577	13.5696	3.69766	-11.7489	9.71001	-4.90574	7.33317	13.959	-30.919	6.1664	25.0447
1503.57	-54.5432	50.3518	18.8422	23.0428	11.1861	63.1109	-20.4239	-19.9823	5.83443	15.4217	-2.51993	-2.06783	-23.4236	5.14414	-2.01264	1.96959	11.1648	0.419816	-0.641895	-22.0432	2.24331	3.66582
1505.2	-67.9187	13.3695	-3.74268	43.9983	18.9856	35.7647	-12.8232	-11.4988	-13.3631	-37.1321	-5.55633	13.4512	-33.7986	4.767	7.7612	-25.5546	13.7934	3.81111	3.79398	-10.6185	9.79849	13.2412
1506.83	-65.4561	26.2853	9.67401	18.8887	3.42923	31.158	-4.58608	-21.4805	-12.3998	-37.8261	-34.0304	7.88187	-29.3833	36.1795	-26.3852	-13.1116	9.61905	5.67505	21.9163	11.3779	17.8055	-8.28239
1508.46	-95.8528	5.86435	-8.95836	31.383	-11.8667	-10.0993	23.733	23.5797	-6.1942	-21.4777	-15.964	13.9869	-11.3907	29.5931	-10.7083	9.69954	28.6686	-10.8049	-3.25614	11.4131	4.62832	-24.7788
1510.09	-13.1777	-5.71991	-3.33576	45.7889	-20.0914	-30.9839	34.9943	32.3474	7.03348	-5.10463	-5.18295	3.97761	-3.85426	-7.47995	-2.20754	25.1163	29.8386	-17.7983	-19.5949	-2.53477	8.33583	-11.189
1511.72	8.09465	-24.5346	-27.2758	25.8866	-51.67	-68.9214	28.038	38.538	20.0056	-5.91638	9.11874	-22.3571	29.548	-3.95518	-1.09385	18.2704	-3.60721	-7.17241	4.97261	13.3933	-5.41705	-11.1627
1513.35	18.3364	-17.8265	-20.0576	7.34014	-42.7482	-30.9731	21.2221	-6.59897	0.852172	54.514	-3.57432	-14.7543	8.75267	-17.7687	-20.1975	0.788184	6.77357	11.3031	16.897	-0.303361	-13.7793	8.99851
1514.98	-41.1365	-24.3935	-16.9947	14.2141	-59.1004	-17.925	15.5642	-27.0146	8.11728	83.1599	8.23881	-47.7329	16.8126	-27.1548	-6.0806	-14.6775	6.47175	21.0069	11.3791	-14.4794	-9.47393	1.19738
1516.61	-167.528	-13.5931	-8.88864	0.255291	-52.8485	8.08187	-22.771	-16.9309	7.89669	30.5274	5.19246	-29.3593	0.0332617	-11.5328	7.73372	-11.1964	9.97589	14.7218	5.98609	-15.6085	-11.7058	-1.50023
1518.24	-83.1704	-33.1909	-15.0525	-14.747	-24.0847	-23.8991	-8.78426	19.5152	-15.0886	-42.6935	-7.11286	-8.95399	-10.7411	9.37568	24.7565	-26.5242	8.07978	-4.48366	5.68707	7.83337	11.5118	2.70739
1519.87	59.0845	27.6873	3.23975	-29.5168	25.2489	-1.51292	-7.16279	4.43344	-19.7361	-31.5167	-7.12123	13.1624	-4.24334	12.1123	-3.72269	-8.38221	-15.2383	-2.17613	13.9911	20.233	16.8467	16.4981
1521.5	119.308	30.7346	-8.80549	-19.6436	42.2577	7.1896	27.8608	0.124031	-8.21635	-8.99145	0.384819	7.91411	-11.581	5.76098	-7.11506	2.4654	-7.78229	-1.86939	-15.3019	7.91618	3.30131	5.81218
1523.13	148.528	56.7037	17.9927	-27.1201	24.3148	24.4695	-5.84129	-13.5559	-8.70593	-13.3775	-4.88317	26.7325	-4.50412	-1.95347	5.18413	6.47232	-10.944	-11.3619	-26.3355	-12.1224	1.83022	28.486
1524.75	107.802	-0.339229	22.4653	-14.2349	12.6564	17.0263	2.59636	22.8414	-9.62897	-25.953	11.7785	14.3202	4.486	19.4796	7.67016	5.24767	2.72766	-0.966513	-3.22455	-7.92861	-7.49831	3.78206
1526.38	139.741	-8.98374	38.2499	-25.9407	18.8041	35.7768	1.46443	-5.68914	-18.4812	29.1041	13.1386	3.30199	14.2067	6.03936	1.89541	1.99317	21.5907	6.52163	7.19207	-19.447	-8.47487	5.90055
1528.01	126.433	5.38492	23.6534	-23.4612	2.42333	38.4683	-18.8121	-28.5777	-3.37902	23.1767	1.3105	-23.9452	44.4914	-17.206	10.3781	-3.92709	-3.61684	14.2525	8.82451	-8.30082	-13.5535	-20.6369
1529.63	39.2715	22.6291	-9.26352	-33.4156	10.8679	17.9146	-22.2501	-35.1819	33.4149	9.73132	-19.6298	-39.9368	9.16171	0.165007	-22.3484	3.59907	-5.333	11.0332	19.096	11.678	-2.38752	-19.2486
1531.26	111.008	-11.7599	-23.6823	-39.9857	25.2913	-28.1598	-1.01609	-10.0638	18.6065	9.66537	-25.7003	-22.8379	-9.9302	0.478878	-17.3003	0.580268	3.59948	-4.73048	14.9915	26.7428	11.0291	-5.10967
1532.89	87.1913	-2.96544	-5.08097	-10.9801	29.7978	-6.42952	21.0836	-0.098048	-3.75285	48.4054	-5.3094	-2.1959	-5.25807	-3.7075	9.95506	8.02326	-6.22923	-2.31138	8.38517	12.3812	5.23814	10.8563
1534.51	32.9089	-25.8257	-2.53482	2.8353	-13.4573	-1.30874	29.3198	13.8007	15.3517	46.8822	16.4826	-21.9429	9.28683	13.6026	15.6825	11.3923	13.4436	-9.29552	12.6217	-3.34252	-6.96939	-6.46643
1536.14	-133.673	-16.3091	12.4232	5.53996	-7.62083	14.0941	7.22174	12.288	10.7699	6.08443	8.18744	8.21293	-28.9019	13.7389	12.5684	-6.06654	8.32571	-15.3996	-9.75243	-15.8644	1.6925	1.88648
1537.76	-98.1751	-34.2024	17.3479	19.9385	7.16508	5.42716	7.80505	-0.448193	9.9546	-22.3861	12.314	4.8531	-31.3037	-9.89676	-3.29362	-19.9695	9.55269	-0.914649	7.41045	-7.3907	5.67589	8.20718
1539.39	-66.8275	-8.93384	34.2813	2.7295	-0.290502	-4.73236	-18.6355	23.5141	1.74833	-52.7507	31.3981	22.4732	10.8957	-3.30095	9.14312	-2.66775	-3.19549	-10.0772	9.2843	-13.7242	1.48217	-4.43049
1541.01	-65.0156	1.35346	22.3463	-25.413	9.97775	10.0858	-26.848	-14.0316	17.8437	-47.3263	-2.51035	12.6328	-7.22109	-16.6567	-19.104	-3.0979	-16.6484	-1.78595	11.8791	0.294417	-1.40349	9.15453
1542.63	-32.5902	-17.6354	-30.9054	-6.92726	-6.36529	-6.80397	30.4364	-11.9483	45.1018	-29.2566	-13.9707	-9.45595	-12.5691	-15.9576	-19.1965	8.9961	-16.3373	2.44044	-7.70388	-5.14864	11.4246	0.382815
1544.26	-32.5048	-16.0932	-2.39411	-9.70572	-2.72677	-20.1668	25.8537	-1.46258	7.90204	-47.6059	-17.242	32.4203	-18.3049	-17.172	-17.3359	-5.53807	-0.442734	5.59133	-22.111	1.30429	0.808913	-6.56533
1545.88	-19.6332	9.08571	0.420396	33.5833	-25.4219	-14.9111	30.4135	20.5036	6.40008	-26.7001	8.00987	12.4777	-4.65979	3.95803	17.6766	2.55431	-23.8791	-4.06711	-8.47356	-2.32243	14.2365	-22.9385
1547.5	49.6122	3.00878	-16.5426	41.1887	-0.974087	3.89126	46.6201	-7.22685	17.7732	43.3564	14.9198	-30.2257	15.1125	-31.3652	13.227	0.325571	7.43746	14.1323	3.05932	-0.701532	9.02054	-27.004
1549.13	-110.873	7.06983	-35.1466	38.0608	2.51641	15.3143	21.2401	-14.6854	5.13891	40.0535	-3.66044	2.31122	-40.7658	-43.4767	-4.70983	-9.75087	15.0835	7.51563	-21.4652	0.0960513	-0.178766	-18.6236
1550.75	-21.0982	30.2398	-40.275	27.3593	-6.2252	15.2006	7.3163	-24.6765	2.0813	25.4377	-5.86	4.98837	-20.9252	-24.1742	4.53937	-5.89636	6.04853	-0.888118	2.0644	-3.32569	1.01126	-23.2699
1552.37	-67.2753	1.69909	-36.7438	13.3821	-23.2535	-15.2669	-3.19048	43.9146	-8.51055	0.582343	26.9411	1.24396	11.866	28.6933	10.4883	2.10638	5.06321	-2.97837	25.3047	-4.51239	3.6621	-37.3356
1553.99	-103.605	-17.8194	-41.7146	-3.02285	-26.4914	-17.998	-19.3447	29.5048	-2.40759	10.4858	19.4957	-2.2489	4.06165	10.8087	0.986759	11.189	13.6109	-13.203	20.6501	-9.10715	-7.63924	-13.8881
1555.61	-62.2318	-7.90023	-29.7281	-9.74665	-22.6475	-18.6547	-16.3762	51.9591	-13.4257	25.9526	25.5957	20.8761	6.89435	17.3678	-0.231672	28.9649	0.12223	-36.851	-7.47045	1.6516	-13.6393	-13.7019
1557.23	-142.827	9.48134	30.2579	9.91998	-22.7857	16.2457	-37.0741	12.8795	-23.1364	29.9812	13.5797	51.2558	1.49175	-7.38733	-0.617711	10.8919	30.1921	-26.5754	-35.0131	14.0843	-32.2644	-7.82009
1558.86	-134.696	29.8326	49.2793	26.2455	-25.7535	37.424	-35.4026	15.7744	-10.56	-0.00597195	25.0425	20.677	22.1858	16.5748	11.0106	3.86951	3.39555	-15.9316	-22.1213	4.64018	-4.82269	4.47921
1560.47	-67.2146	40.8545	60.1501	21.6216	19.566	33.2468	-13.203	-10.0611	-9.71628	-17.4419	0.999773	27.8839	8.56058	-13.3715	2.0695	-21.0756	7.81136	7.59805	-26.8041	20.1453	-2.85927	18.8853
1562.09	-12.1862	-18.0246	19.9517	-5.07491	18.8559	8.84458	15.4272	4.06261	-6.95309	-26.4106	-19.3344	20.0793	-18.6497	-24.9551	-19.6399	-19.993	7.35651	0.240365	-24.1567	7.06802	3.74478	14.1138
1563.71	66.2644	-30.7846	-3.34491	-5.68494	16.866	2.83255	43.9978	5.44151	9.35188	-11.3492	-21.561	-22.6852	-15.2702	-0.004318	6.90382	-19.4269	-3.63904	1.75047	-25.9059	-12.1005	17.5966	-9.51494
1565.33	39.2532	-38.8811	-19.4313	-20.3042	-20.4268	-21.4676	31.509	22.2619	-0.730146	-16.1748	-4.0314	-47.7424	11.0739	33.2511	-7.41784	-13.8397	2.56765	1.00868	6.33426	-20.4643	15.9062	-11.4366
1566.95	87.6169	-45.793	-31.5242	-10.9972	0.949525	-9.55924	25.3082	-6.34649	3.96372	3.39606	-6.90829	-46.132	14.764	5.41112	-17.9809	-1.79225	-1.56509	6.22173	0.859584	-23.5153	10.4466	9.08793
1568.57	-6.88619	21.0328	-9.00062	-20.6711	20.1554	-4.95093	-15.0261	-37.0571	-5.54161	-1.1146	-19.242	-16.2681	-10.3806	-6.33242	-43.509	-10.1443	-17.4125	-3.99433	-19.6418	0.0591035	0.9827	26.3922
1570.19	-52.2232	5.00107	-2.50085	-0.648237	-18.5535	3.53413	-29.1237	-34.6381	11.1749	-4.61882	-21.1022	0.891662	-16.0491	8.27442	-25.421	1.80535	13.6499	0.790894	-9.41319	0.551726	-13.7644	22.2495
1571.81	-101.183	4.84804	-3.96632	-10.8774	-35.3463	-3.76558	-32.104	-6.2632	-0.937159	-53.1173	-14.7924	-2.4363	0.965913	18.8792	-7.20744	10.9285	19.7704	0.196202	-15.5411	-8.80262	-12.9825	15.0449
1573.42	21.2083	26.5372	3.74325	15.0837	-14.8508	-42.8513	1.51556	20.856	-15.7979	-77.0615	-21.7527	14.7059	-3.7554	12.8038	17.2325	0.210883	-7.07697	8.89681	-21.2692	16.7749	-0.880022	0.148574
1575.04	94.2752	18.7472	22.3419	-15.8978	-25.8376	-30.0016	7.39781	29.4608	-17.2877	-53.9136	-32.4475	31.1552	11.1338	19.2646	2.71802	1.13503	-19.3151	-3.1548	0.0803593	12.9133	4.55842	-9.9638
1576.66	54.8443	-22.5234	5.38894	12.4441	16.8288	-16.424	45.3826	14.5869	12.1195	-1.09909	-14.1831	5.90394	-3.66761	18.0694	23.2657	-21.7398	-5.9685	11.5494	-16.1253	13.4834	8.97324	-30.1337
1578.27	51.1789	11.1843	3.90957	10.7549	-3.91093	20.6265	34.9017	-8.63518	-27.1906	54.4337	-6.80493	20.6267	15.9966	10.9364	14.5062	-8.81583	9.94622	3.0378	-5.78067	-17.0323	7.68034	-4.55068
1579.89	60.2583	-18.1392	20.6991	2.91224	-2.65398	26.6803	14.4798	-8.54135	-35.1867	71.0535	24.3735	24.2478	31.03	-4.39605	-0.491844	5.00488	-3.40551	9.83607	-0.10005	-27.2028	-2.64685	37.5869
1581.51	-87.3246	44.1439	30.7529	8.43845	-2.68255	35.045	-18.7271	-43.3886	-31.4978	48.3614	12.451	29.4851	19.0119	6.09946	-6.22933	-10.6883	-29.4386	30.0401	-16.0532	-6.68008	-5.94932	41.1546
1583.12	82.7669	-34.3844	9.82154	-6.68354	23.6468	-8.52776	-5.76644	3.95126	-7.84196	-16.8182	13.0184	4.93895	4.82021	41.5398	-5.36384	2.06338	-12.747	25.6995	39.0636	4.68277	5.3508	18.3321
1584.74	69.6032	-45.6792	-26.3115	-12.5824	35.8275	-32.0361	3.31834	-3.87588	-7.40065	-30.4532	-5.95307	-19.9956	-31.6452	6.24282	-8.12858	-5.19443	14.6547	14.7277	23.8763	1.23306	10.8639	19.7964
1586.35	201.657	-59.2999	-5.48842	12.9066	68.8566	-46.7033	11.5844	19.5188	-15.4454	-14.7333	6.2289	-32.3892	0.830032	-3.30564	2.84895	-10.9583	8.42819	26.415	41.8912	16.8001	11.2651	0.832183
1587.96	97.6465	-5.81779	-4.94873	2.08249	45.4505	-19.9125	-14.7417	-1.34139	-9.47633	-6.97562	-12.2205	-14.3191	2.76636	4.48549	-8.59193	-0.91812	13.0548	8.73406	20.0525	16.9164	3.46728	-13.6985
1589.58	70.9979	-12.1359	7.79953	11.5639	76.2292	10.5989	17.6054	-15.9232	1.44946	17.3688	1.85991	-15.9263	12.1616	-1.64473	6.0216	-12.8889	14.6163	15.4106	11.189	22.5679	3.52989	-19.1373
1591.19	9.88526	21.9665	41.5831	-19.5549	24.2214	43.1302	-19.285	-22.0385	-17.978	7.80295	-4.30298	4.889	30.4188	-8.82006	7.67148	8.64173	15.0675	-11.5959	11.6745	2.3639	-11.6577	3.12025
1592.81	61.7993	7.14864	46.1182	-16.0785	1.38628	28.6506	-15.6319	-7.1736	-6.04493	35.7141	7.62416	-13.4923	32.4234	-20.1346	-5.14928	18.7406	-9.77817	-16.0753	22.4962	-4.59124	-13.659	20.245
1594.42	-52.7697	50.1551	34.1161	5.35572	-61.5932	31.3168	-11.7661	1.2024	5.58426	30.3194	3.99135	-7.70905	46.6006	2.39943	16.8508	28.1717	-24.5531	-2.60548	4.02198	-19.07	-12.0724	13.625
1596.03	-23.3011	-46.3154	5.45522	-2.55939	-53.7951	-20.7646	-1.56913	57.8538	17.3278	-40.1671	1.48616	-5.13262	11.1004	2.66323	23.3707	14.7022	-5.15419	-19.1618	10.8863	-12.4723	-1.03978	-15.1168
1597.64	-85.8949	-46.9169	-11.9981	5.60309	-12.6614	-47.1936	2.49663	18.6483	42.0249	-46.0306	-20.157	-25.3092	-52.0955	-26.8402	-8.99294	-22.071	-6.34285	-12.6914	-11.2021	-13.4291	8.57143	-5.36891
1599.26	-94.4546	-37.6316	-22.9877	33.9746	2.74851	-47.075	0.0707777	13.6818	21.7338	5.95468	0.240927	-20.6062	-21.0823	-40.9494	-18.6135	-21.4556	-2.04308	-5.29637	-11.0635	-9.91592	-3.0366	-10.4934
1600.87	-49.9145	17.6355	-53.2398	17.464	6.86321	-27.6479	-7.0818	-17.712	19.6311	31.9698	5.94677	-22.1045	-2.48126	-24.0072	-17.5177	-8.97223	-11.2687	3.35616	-26.5524	-5.32751	-4.67563	1.63963
1602.48	-26.5552	11.9058	-43.4713	10.5583	8.56359	14.9436	11.0531	-42.4948	44.1354	59.8361	-0.200727	-14.2505	2.61301	-15.6584	-28.8785	-1.1261	2.36285	20.0279	-19.8026	0.36448	-14.2802	-0.23633
1604.09	3.22915	-6.33224	3.71906	-38.8087	-0.556015	12.7032	-25.7867	-39.1658	44.8826	-19.3809	-9.86985	-2.26404	5.76614	-6.84344	-30.7416	15.3722	10.0453	-0.760867	7.35142	8.34884	-28.0973	-6.27058
1605.7	80.7072	-0.924053	-4.20642	-8.73557	34.242	-3.30516	-3.57789	-8.30046	10.0225	3.16405	10.5282	-9.02374	-4.18796	-4.08615	-21.3349	5.07887	-1.64715	-3.92792	19.207	5.54197	-13.5747	-0.229539
1607.31	-11.5265	6.53832	0.995332	-0.926901	11.5407	-6.79044	-12.2109	15.7987	10.3863	-52.781	11.107	-4.87816	-16.1189	8.70804	3.33659	1.24619	-16.5706	-6.82728	7.88963	-5.39066	-6.0507	-3.27157
1608.92	-103.321	-31.9253	-21.916	8.5701	0.994568	-14.5925	-15.1137	25.923	5.38861	-26.7604	7.0452	4.20975	-32.9894	6.81348	21.1941	1.268	16.7623	-6.78668	-15.7638	2.14282	9.57393	-18.3743
1610.53	-151.902	-26.066	14.5862	-8.15785	4.06222	8.51829	-23.3897	5.10636	-7.49193	-9.37252	5.1689	18.4344	-24.3173	10.4963	14.7646	1.42049	22.7381	-7.81891	-9.15543	4.26761	5.02058	-13.9852
1612.14	-129.24	22.5223	1.60755	12.1987	-11.2614	14.8628	-21.1468	3.45417	-15.1957	18.2821	10.1964	24.1305	6.14046	1.51237	21.5666	8.51273	15.7101	-6.07427	-14.8859	5.93667	6.84279	-4.16392
1613.75	40.9946	46.4193	-8.79362	0.664487	-0.291528	22.3573	-2.51177	-16.0806	1.35347	28.6559	-1.43717	17.3585	18.8113	16.657	15.1831	4.19626	-0.330843	9.86141	-8.57553	15.0483	5.97473	10.4669
1615.36	23.3388	26.9554	-16.5967	-5.12707	-10.5531	31.6645	18.6479	-38.9232	19.8169	59.3484	-11.8302	-2.40831	12.035	-1.57279	3.85002	8.04641	21.0424	7.10591	-15.1179	5.72599	4.72987	-0.402204
1616.97	53.9295	-5.42874	9.99846	-27.2217	-3.72115	11.9369	17.4494	2.83639	10.4361	6.33326	-3.62523	9.40831	-2.8225	4.08298	0.39474	20.2826	23.1381	-14.9548	10.3696	7.57387	-1.44229	-5.31317
1618.58	73.884	9.74095	7.85972	-5.4841	7.8526	2.17316	27.1936	10.4597	-9.95932	25.7322	7.1114	4.48643	-15.1179	-6.14002	-8.03987	1.21832	-9.14452	-10.6637	13.2842	2.52869	-5.77755	1.12241
1620.18	-52.2494	-24.8447	4.78099	-9.21935	-1.6057	-21.6497	4.51671	36.6798	-0.288131	-57.5824	5.27342	0.208573	-35.6757	2.42043	1.36286	-8.01388	-27.1404	-17.9046	12.984	-0.0963423	-2.02248	-12.2833
1621.79	-124.089	15.0643	-19.4607	15.7837	-13.0783	1.46494	-10.2143	-7.22412	-3.87832	-4.65377	-0.877573	-4.99257	-29.5538	-3.55514	-5.03957	-7.51601	-11.039	-13.0117	1.41029	-5.02388	4.46102	-17.181
1623.4	-125.036	-3.39253	1.66278	3.38057	-33.3292	17.8435	-27.7999	13.0686	-29.5441	17.2579	23.1083	15.7847	5.62054	1.15071	13.9492	1.33302	-13.9609	-19.7113	-5.96597	-8.65236	-3.29222	-10.6962
1625	-56.5475	-34.7817	-39.0769	35.5064	1.42169	-6.22598	3.03776	28.8471	5.84635	-2.76906	24.2824	-12.7491	4.23232	10.6084	15.4595	-10.7873	-7.9978	-3.4481	-10.9647	-0.312122	13.1759	-23.3656
1626.61	77.7767	-42.0529	-4.96127	28.2572	24.1368	10.741	8.62316	27.2517	6.2858	11.7298	29.3472	8.11548	30.196	22.1707	22.8886	-25.6803	-5.33418	13.9394	-2.08669	0.0431423	3.69467	-16.1028
1628.22	54.3481	7.80835	1.44158	6.30134	-3.18978	24.456	-7.00204	-7.11159	1.36416	63.7255	27.0435	-6.18519	53.6996	4.7448	30.1526	-7.09252	2.71591	2.04143	-4.91735	-4.51561	3.77516	-5.59564
1629.82	22.0759	15.0547	21.8627	-18.8104	-7.22143	30.1563	-2.96086	10.7583	-12.1208	40.0018	28.3023	6.99346	27.5009	16.7409	10.9092	-4.57305	2.37204	-0.0598299	9.04157	-6.27114	2.24431	19.5612
1631.43	10.7411	74.4664	58.1874	-12.2487	-14.2193	37.8402	-19.2057	-17.0896	-14.3661	-2.28335	-8.33387	23.1077	6.76097	-0.817141	0.405889	-4.40794	-25.6053	7.13702	24.0807	-3.07514	-3.20335	35.7476
1633.03	-86.5211	13.8477	25.1806	-4.56867	11.6244	2.27293	-22.3332	17.2323	-8.57446	-58.412	-1.19685	10.4657	1.09876	14.0056	0.37895	4.1667	-13.7697	0.175096	13.3925	1.8213	-7.74681	8.86489
1634.64	-9.7153	55.1422	-7.69488	11.885	2.82738	-4.62219	-17.9196	-26.5068	-17.7853	-24.4	-3.03185	-8.32334	3.7669	-15.5456	-21.3784	-5.64224	1.44607	-12.1689	16.1243	-3.27914	3.29039	4.77843
1636.24	81.5837	11.5258	-2.0454	2.90529	10.9587	-11.5444	0.127976	9.12923	-33.4373	-3.45315	13.9244	10.2274	-4.45268	9.16531	-16.8753	8.59966	-9.48842	-8.27792	8.47124	3.33317	4.62891	15.4973
1637.85	103.339	-17.2826	-21.1184	16.1566	32.8172	-13.6202	41.5181	27.1056	-44.2823	7.51921	5.07816	11.0526	-7.48132	23.7223	-9.92294	6.24793	9.43858	-9.27396	-8.31802	9.67222	25.269	8.31354
1639.45	88.3311	-54.4751	7.01456	7.6294	19.7081	-4.79404	47.6852	9.55162	-39.2689	8.46442	-5.50139	13.3923	-8.31037	34.38	-8.80276	-18.0134	31.869	15.395	-2.06903	0.519641	20.3415	-9.67568
1641.05	75.4248	7.77261	30.1424	-18.0086	-27.0921	38.9716	19.3372	-55.7554	-36.6568	43.2407	-33.4115	11.8108	-7.02383	-2.23223	-5.02112	2.88949	23.7526	12.8463	-11.6079	-2.08406	2.73883	6.89555
1642.66	119.672	-1.53275	18.6365	-44.6176	9.84753	4.5821	20.3876	-46.0007	-15.6242	-16.9453	-29.9527	-13.2409	-25.3994	-1.8199	-17.1515	-18.7502	-14.2965	25.7398	5.72686	12.572	-6.10499	20.256
1644.26	84.3654	10.0581	24.5772	-22.2861	9.06947	11.0517	-3.8524	-43.774	34.0363	-67.3447	-35.581	-4.40226	-15.3564	-17.2162	-5.43312	1.70214	-25.5141	31.5031	22.6452	18.9824	-19.2608	4.56926
1645.86	71.2419	-32.8757	37.0684	-4.43884	31.7325	-26.0031	-16.3575	23.4323	11.5456	-44.8487	18.4879	10.1714	17.2069	-16.8528	30.7021	10.8849	-16.6402	-2.29715	2.63358	16.4578	-24.791	6.29374
1647.46	27.0172	-19.7608	-2.14805	20.502	-7.12133	-53.2014	0.844976	43.2027	-4.3301	-35.8736	25.5265	-3.12932	3.14743	-28.9083	23.0452	15.4886	-6.24056	-0.657977	-5.94011	-3.51024	-14.6269	-0.282097
1649.07	95.1094	-7.73865	-18.7231	12.6191	7.70035	-47.6842	10.7124	23.1295	11.947	-0.900124	6.95464	-21.0504	1.54128	-36.0572	1.96628	3.33606	-14.2823	13.9444	-16.4592	2.16541	-1.20144	9.21032
1650.67	-2.17603	-20.6258	11.5048	13.9019	19.379	-42.0356	0.788423	46.2307	13.0187	-64.0262	-16.8424	4.89229	-10.5309	-15.1345	3.86248	-10.1156	-11.2083	5.81598	-23.4365	15.2708	8.8899	-7.00671
1652.27	-99.7325	-39.2345	5.3715	23.6402	-52.532	-10.2637	17.8299	4.8195	14.2758	-10.3681	-35.3669	-11.7701	-6.15866	-1.83375	-4.66419	1.16003	24.9115	14.9901	-26.3634	-14.1314	-3.55989	-13.4156
1653.87	-119.465	-27.8005	7.62191	0.671945	-73.5677	12.2818	-4.9429	-26.9596	20.5404	18.0707	-28.4491	-6.31208	-4.79213	-23.8906	2.96172	33.2322	23.3803	3.51993	-10.6754	-22.9482	-18.8067	0.638238
1655.47	-56.3026	12.0893	-25.7066	0.838062	-25.3602	-17.3997	12.7403	-38.7513	22.1016	11.8816	-27.2311	-30.2456	-10.3439	13.4493	-15.4481	16.0901	0.175186	3.79018	7.32215	6.09321	-6.80263	3.78134
1657.07	-15.0171	23.2583	-5.45709	-5.01101	-20.2227	20.6588	-14.4627	-33.7638	29.6979	-1.30703	-10.9046	9.09979	17.5412	-10.5354	3.9133	47.8217	4.32408	-21.7221	15.8385	-5.07797	-11.2684	0.0552923
1658.67	19.2908	11.0231	33.6562	-33.7309	5.45403	-17.8299	-10.3516	15.1885	-14.4891	-30.4853	1.95358	17.5059	15.7131	-23.0594	17.2548	24.1293	-0.939075	-45.5488	21.7829	8.83166	-5.4043	22.0144
1660.27	-36.3003	26.2353	12.7061	-22.5792	-12.0111	15.9297	8.01988	35.36	-28.5058	-3.87195	27.764	19.2204	28.0403	-15.18	18.5336	17.6961	-13.4574	-6.24067	-4.43491	-9.81408	-24.9459	-4.59347
1661.87	33.9348	56.6925	-30.3864	-8.95914	-10.3938	13.5946	6.98009	-17.6029	-5.27956	44.4335	29.4917	-29.0617	56.9027	-22.7722	-3.21865	-8.71943	-19.95	21.4862	2.34543	-9.16922	6.40556	5.7002
1663.47	-40.4651	-21.7349	-41.8993	17.7601	36.5553	-13.9173	-0.0759648	37.998	32.115	-84.9638	-9.0455	-13.0891	-27.2522	28.3137	-12.1326	-20.0367	-9.51198	22.704	11.6832	-0.600105	6.78597	-29.6024
1665.06	-74.3584	32.3697	-13.2118	30.9585	18.2	68.3079	7.11478	-59.7294	7.71966	70.3191	-44.1613	-37.4966	-10.0298	-2.67989	-5.51014	2.17849	-43.49	37.6594	-16.1947	-21.9456	-11.8582	0.853495
1666.66	-221.567	-55.873	-80.4582	23.0918	13.6005	-2.89618	0.402551	-35.3747	4.5393	83.3092	-7.71101	-30.0848	-36.6329	-16.5965	7.12065	12.2033	27.6939	19.9247	-7.03977	-24.7144	-22.4986	-9.44786
1668.26	-36.5052	-7.32278	-67.254	-7.8861	57.9496	-60.9115	19.7724	-7.25202	0.391907	-52.485	-30.6491	-21.6272	-37.0016	22.972	-16.0266	-40.9404	7.33094	0.777215	12.5614	11.6637	21.8206	-1.23401
1669.86	22.2344	-11.9169	-20.8837	-49.7379	21.9742	-18.1589	-30.7666	19.12	-2.13262	-71.0933	1.13232	43.5741	2.39974	11.7996	-4.71413	-15.8053	-3.90833	-20.633	2.34314	6.72487	1.5816	15.7053
1671.46	177.924	-8.10345	-22.0796	-25.8216	-2.66802	-20.6083	37.7157	8.12939	30.6641	-23.5053	-13.6999	-43.3084	22.1255	15.1127	-13.1072	-2.88401	17.2138	1.92939	5.11724	21.9713	16.8743	-3.68382
1673.05	146.901	70.0309	6.93803	-8.49043	28.0559	61.1392	20.9841	-15.5393	19.4501	58.5296	29.6835	-1.51686	62.0572	4.27365	-24.5556	0.146422	-3.24417	25.7933	-19.9592	9.35888	-10.2852	-8.09732
1674.65	-23.3274	98.4892	4.58177	-7.4991	-0.24185	31.8726	-16.9474	11.9727	-6.91073	34.7731	29.5856	16.4057	52.4389	32.641	-21.0413	12.6018	-20.8795	4.07175	-29.6724	-3.05354	8.51032	35.7731
1676.24	-147.327	-14.0922	-30.3441	5.23944	-19.2815	-10.3666	4.97113	8.57839	31.377	-64.4058	-15.9334	-14.0656	-9.63547	-7.24612	-6.52047	-3.48622	18.8674	3.62169	-18.4974	-25.5784	13.1987	15.9865
1677.84	-91.1157	48.428	10.3813	4.54397	66.9149	3.9248	-2.73388	-56.0576	2.63512	21.6841	-33.5941	-15.5205	-49.7088	-11.608	1.43022	-28.0377	-28.3145	1.33095	-5.43141	27.9141	33.9366	27.7564
1679.44	-145.229	-79.534	-82.4446	43.0207	80.0954	-39.3267	58.3015	-32.0267	20.974	60.9792	-30.08	-31.8378	-111.993	-2.30053	-29.4366	-16.8255	54.9015	14.5647	-3.48098	30.1222	14.5071	-24.4407
1681.03	-76.1719	-91.2473	-16.164	-11.3627	49.3809	-84.7839	38.9872	17.162	3.18783	-78.9615	-18.0662	11.4816	-82.8187	-3.27964	-55.1671	-33.8565	48.9877	-31.6424	47.1672	25.8474	8.81268	-10.6757
1682.63	-37.5389	-11.1862	-8.21397	20.3171	-8.81978	33.5033	12.0178	-24.4224	-37.3601	37.8627	72.5408	43.5331	12.6266	14.232	19.5843	-21.1744	2.6365	-26.5162	13.1354	13.5219	17.8768	-10.9992
1684.22	-201.909	52.6983	21.0968	91.0928	-77.4013	62.8693	5.88545	-43.799	-33.5554	119.574	90.0787	11.9501	68.5081	33.4827	66.3202	-1.68971	22.1724	19.0299	-17.7128	-14.7908	17.4076	-9.26917
1685.81	-212.084	-0.105787	54.6991	1.77308	-6.73044	28.3702	-17.2704	9.96204	-26.7538	31.5157	33.4004	50.5496	-24.4295	-13.5262	-12.2885	-15.0208	23.5287	-31.8681	-11.5564	-11.7036	-6.41502	3.17125
1687.41	-51.2741	-38.8475	69.4275	-31.3859	-33.4192	-25.2235	-35.6778	112.645	-42.4655	-3.62803	48.6765	74.2977	7.06578	32.973	11.3656	11.3853	16.4137	-42.6589	-3.86432	-7.9019	-11.8074	26.6737
1689	-51.7764	-76.9617	11.3775	-7.97343	-81.9404	28.8819	28.4097	5.69677	31.1516	48.8967	12.1242	-41.0395	28.5554	-27.5611	22.948	9.02314	48.9598	-8.00306	-12.0124	-41.991	3.53448	5.84719
1690.6	81.6372	-9.6931	-26.6422	16.7717	27.0455	8.58418	6.37515	5.9024	15.4611	74.4035	-16.0812	-5.99344	8.60125	23.9513	38.9985	14.1601	24.6343	-51.1011	-22.8319	18.4726	9.24713	7.19992
1692.19	-42.6847	-57.2145	-8.18503	26.2194	80.3188	27.2308	51.6221	13.6617	55.8813	27.0381	-36.775	-20.2057	-43.7007	48.2753	-4.25294	10.5277	23.9128	-30.4333	-0.99275	9.28128	-15.1973	-39.5279
1693.78	6.33119	-34.9281	24.1704	-30.1972	-48.2707	-22.4917	-28.9696	5.04409	14.7405	-41.7826	-12.1074	-7.36534	39.591	14.5452	-48.2212	10.1108	23.6993	-25.5204	29.2957	-36.3834	-25.2065	11.2685
1695.37	112.103	91.3385	38.5252	-33.4542	-23.1314	60.7057	-63.0602	-18.641	1.42851	-24.5777	49.6837	31.719	64.1537	4.50027	17.3239	7.02573	-30.6951	-22.322	7.02846	-8.55834	0.857301	7.26242
1696.96	-108.847	46.0689	39.8418	5.82947	-44.656	-6.5187	-52.3027	-22.8283	14.9843	-46.8067	17.1031	13.5802	6.31503	3.23304	18.3035	-33.4422	-15.864	41.6719	-15.5233	-11.9461	-4.38441	5.46353
1698.56	85.7802	26.9394	12.5831	-35.7711	27.7607	-45.6914	-26.3721	-5.81378	35.7017	-43.4185	-39.2458	4.63875	-96.6388	-23.8435	-16.5732	-8.79262	-9.56242	-7.22517	-30.2062	2.49414	14.6065	14.1459
1700.15	368.023	86.9316	34.9243	-0.854917	44.1114	41.9899	-0.259577	28.5307	-49.8274	127.627	39.5398	7.884	29.7605	-0.999645	29.1295	25.3201	-51.7356	24.7723	-30.7286	19.2753	4.69727	-10.0097
1701.74	89.3977	9.84159	-3.87075	-14.6599	-41.046	35.5153	10.2303	9.8802	-14.8198	79.5428	15.5227	-23.1895	6.91526	-52.0673	14.2938	21.6243	-10.5187	-10.7195	-20.1835	11.613	-2.79798	-25.1864
1703.33	119.062	60.896	18.6093	-9.67663	72.5809	37.0636	19.6504	43.808	-62.308	17.8	1.76542	35.7309	20.6132	5.77978	40.5843	3.98653	-43.6753	-41.5109	-31.1467	57.0053	19.0735	-5.48182
1704.92	-144.731	-66.2695	-41.2191	22.1035	-16.0022	-63.7419	71.317	91.3098	-43.1049	-25.8699	4.68524	-4.84597	-32.7901	17.7732	18.5291	-12.8663	41.7216	-13.3012	-34.5762	-11.2349	8.50447	-14.6839
1706.51	-115.751	5.47216	14.9579	9.30282	-33.9177	-30.5371	2.59991	23.2718	-8.64193	-92.5359	-12.7952	43.9759	-10.8909	50.3678	-20.6373	-12.9399	-10.7304	21.0616	40.6018	-19.8308	-13.5719	9.84027
1708.1	92.9393	175.577	47.5917	7.5853	25.4699	135.053	-23.8037	-34.463	-40.5957	57.1921	-2.22051	47.7822	39.5443	18.8691	-32.9848	5.50842	-52.1021	-13.8049	30.0125	16.6808	1.2585	13.9078
1709.69	146.726	-22.3945	83.5844	-13.8594	-60.1795	57.1591	-57.6667	-30.3037	-7.48964	2.54994	26.2876	20.2903	32.4644	25.7141	24.9228	47.8344	-11.4049	1.71774	41.0048	-25.299	-23.8613	-1.86472
1711.28	156.344	50.2021	-3.34983	-34.7971	-36.3771	-41.612	37.5711	-33.7105	19.0282	-23.5764	-52.5762	-43.0862	-48.5997	25.5717	41.2781	-11.3384	-26.1045	7.93541	-27.0003	-20.0342	39.6901	21.0189
1712.87	149.513	-24.0549	52.4643	15.2502	67.8794	-33.7796	61.0676	5.8319	-25.1074	-70.7806	-13.4753	-32.6495	7.17477	-42.2915	16.6724	-17.3623	6.49319	46.0606	1.72524	30.9195	19.5748	-18.5882
1714.45	-90.1975	-56.8339	89.0356	-43.2946	-80.0447	-64.5726	-53.8396	37.9485	-13.6185	-156.327	-22.8325	-12.0143	26.4769	-62.4163	9.35927	-9.26159	41.5901	-26.7595	54.5215	-0.231046	5.14715	0.804431
1716.04	28.5635	56.7354	-33.2682	-30.8407	25.5467	2.16231	8.57025	-13.3065	-9.39122	-13.3135	10.4042	-69.5232	7.50477	20.1355	-4.65318	-37.1855	-15.0141	7.88891	14.1556	-2.00357	31.5507	2.53694
1717.63	-30.3921	-63.7621	-105.342	-2.12049	-66.3564	-75.795	18.7564	50.8397	4.63561	-28.3965	24.9747	-44.4789	15.4728	10.6105	13.0786	16.0545	5.05408	-5.82602	12.3224	-22.4862	8.83956	-21.5959
1719.22	-318.794	26.4864	-36.4945	46.7545	12.6168	41.2583	19.1668	-10.9187	-19.7462	15.3161	2.26965	-5.11004	-14.0139	33.1255	3.30962	15.4685	-19.2116	45.0985	1.5701	4.76082	1.48491	-45.5076
1720.8	-37.6743	125.373	-1.52951	-7.40065	-11.8195	123.67	22.804	-73.701	-7.83406	113.977	-30.8674	-50.4403	-9.80307	-63.6385	-51.9217	53.5913	-18.1032	11.0717	-30.9228	-15.0218	17.5134	-2.59659
1722.39	478.126	-148.462	-5.10963	-57.5804	34.4927	-18.2383	10.0089	9.18295	1.56236	83.1527	83.0266	-63.8345	78.8194	-58.6676	39.377	48.9209	-36.3559	-36.2203	21.5338	-17.3175	-9.08342	-2.72194
1723.98	74.3832	-65.3943	-15.5189	14.7237	124.348	-38.8198	95.892	-100.625	50.6791	-2.50315	-62.2872	-142.247	-134.76	-76.0351	-64.7429	-114.07	-17.0326	33.4604	3.07173	22.8422	13.0387	5.10336
1725.56	100.638	-126.789	-31.5136	17.008	104.215	-43.5009	33.1992	14.2551	49.954	-9.86857	13.7818	-52.3863	-42.8973	5.54262	-82.0785	-34.7245	49.5455	30.8526	-0.451947	24.6866	-18.8322	-12.0837
1727.15	48.4678	-21.7369	-57.4578	-25.24	5.65433	6.30681	27.1554	-29.0958	35.7414	29.9735	-7.74645	-21.8077	21.3063	70.3012	24.1512	-13.6524	-41.1846	39.1794	16.4197	-20.3063	8.22218	50.7977
1728.73	-31.3286	133.75	-40.5166	0.884945	-111.777	57.1769	-35.131	-94.4547	-15.2124	117.858	1.33345	11.8015	48.8744	13.2406	-1.39947	25.9344	3.79607	8.08602	-8.60335	-28.8376	-20.2072	19.4802
1730.32	113.261	170.839	73.2693	8.16828	-104.294	58.5668	-100.904	24.5955	-108.337	-27.1428	28.2996	132.938	107.54	36.116	34.8138	51.2122	-62.3798	-80.0101	38.7677	1.24532	4.88256	16.5034
1731.9	-68.1326	129.355	146.577	-12.6316	-10.4257	91.1529	-44.553	-6.60436	-96.1059	-67.9485	-49.3476	71.4901	52.9535	29.0926	25.7144	-10.3394	-27.3876	-4.58922	24.3506	0.115904	-15.2484	24.3398
1733.49	-15.5703	18.1581	39.652	-30.8606	-63.639	50.519	-48.2189	-8.85805	-12.482	16.0603	-3.39375	16.8788	-15.8276	-54.7077	7.77322	45.7324	45.9875	0.537818	-23.3848	-4.81859	2.0624	23.3538
1735.07	51.7356	-7.91727	-3.20112	11.8179	-27.1595	-90.5807	-87.8787	61.9692	6.10278	-104.647	18.3654	31.5512	-35.06	-91.3108	-11.7044	9.83134	1.72757	-106.783	-34.1504	37.7043	-4.18599	-15.3402
1736.65	-177.19	-15.6978	10.8214	76.758	63.1425	37.7736	-16.6616	-87.3592	-10.2463	38.1982	-40.1802	-49.1219	-70.3988	-57.2779	-37.8788	-28.7741	14.4258	8.52474	4.72401	-14.8695	-37.0438	4.71573
1738.24	128.532	-108.549	-98.7663	35.0482	195.395	-70.0857	80.9843	76.0738	-27.4705	1.03296	15.8792	22.5216	-48.2185	75.5379	-12.7685	-45.9295	11.7159	43.5704	-18.4001	5.34557	-48.4065	-22.4447
1739.82	102.909	-84.4688	-65.622	31.3615	73.6263	24.2455	73.178	34.2389	-3.74517	-18.4369	16.3186	6.39021	49.2837	88.4852	68.9624	-36.2378	-43.4278	44.12	18.4582	11.2878	-13.5168	-39.3966
1741.4	-276.149	-50.1652	81.5191	-33.5278	-125.613	4.3251	-43.9156	66.2734	-83.3092	-58.2336	6.23227	87.2241	30.4818	23.7139	15.2434	32.9804	20.5426	-4.6065	8.65641	8.63465	-37.9644	-51.0602
1742.99	107.786	12.3786	6.09011	37.4296	1.70845	-46.9932	26.1457	-13.9705	-56.2472	-3.61049	9.88571	19.082	-10.6503	6.09942	-25.6508	-11.9418	39.9928	19.9989	-26.8385	-26.0113	32.4835	2.09147
1744.57	76.9644	-7.89173	23.7748	1.72865	80.5432	-20.9311	58.7944	-26.4113	-14.1976	48.2874	-40.0035	-17.3147	-50.2376	-6.39674	-42.4882	-7.8485	28.675	42.6819	-10.6153	-15.7655	23.239	-5.91963
1746.15	-136.538	-41.5352	-0.990814	-16.7774	-15.5253	12.4749	-57.419	-28.0715	9.66235	-16.5255	-0.904646	46.8086	-62.6784	11.3686	-57.3387	-6.19605	74.6789	53.4426	6.42163	39.0052	-1.84881	-52.282
1747.73	-392.008	62.8688	-48.8513	56.823	-39.7094	57.392	-43.736	-77.5529	48.6028	14.0063	-28.713	17.997	-98.4535	-61.3758	-63.6094	-15.7557	26.6176	-13.6038	-66.9779	-2.28086	26.5009	-18.4129
1749.31	24.6104	83.6541	28.1725	-2.48963	-19.3056	77.5232	-8.85031	-108.909	15.0726	48.5767	-14.9118	-9.36147	53.6343	-51.2323	-17.4321	-23.8627	-4.96597	27.0355	1.36926	-17.6268	51.7797	44.6095
1750.89	38.593	51.7773	-105.134	43.7045	116.567	-58.9447	65.1271	29.8298	23.7355	-100.705	23.6481	35.3858	5.71665	27.0868	-15.1566	-74.9622	-49.7841	31.066	-29.542	-6.14723	-7.09971	13.8939
1752.47	-159.874	56.9123	37.6407	3.64167	-97.911	102.381	-96.5774	25.7988	-19.9708	49.2503	0.0234123	44.7808	38.1629	62.8623	17.4561	29.2485	-62.0671	-26.1781	-14.86	-14.205	-44.9535	9.40706
1754.05	-41.8461	-27.698	43.7283	-25.2375	-96.2502	12.7945	-18.8045	26.936	-23.5793	27.5343	-12.0208	70.1201	17.5718	30.4303	7.00243	40.9966	14.9818	-59.7488	13.1577	-21.5089	-35.2578	40.6537
1755.63	83.4312	-75.6461	-56.0801	14.0449	-61.6618	-76.6004	14.7965	-78.1629	88.5799	-8.19121	-27.1981	-68.6915	7.82112	-96.4314	12.2629	-35.4156	55.0453	18.7571	16.6096	-23.4794	-2.00769	5.63263
1757.21	-166.84	-150.372	-72.9093	17.8336	-18.908	-134.56	39.978	34.2458	27.9442	-29.1275	-10.9424	-43.0949	-43.3317	0.695354	12.0034	-31.0742	5.36177	68.7909	-1.14027	6.19889	-14.919	-33.6788
1758.79	-403.223	71.1632	109.281	-61.3896	-11.1185	61.7425	-124.22	-87.8325	-18.3974	-102.318	-39.3397	140.71	-66.6028	40.413	-38.1423	16.7595	-13.8607	70.6802	2.14113	69.7126	-28.8335	48.1623
1760.37	13.7627	23.2456	-49.8167	34.5235	1.04309	-43.4884	-20.9641	72.8788	45.249	-32.1842	30.9728	4.11282	47.7812	50.7464	65.795	-7.20967	-75.213	-28.4425	17.5216	19.9098	30.3811	-2.24122
1761.95	251.593	-53.5185	-31.9048	-53.8151	-55.1972	-85.1716	19.6056	145.299	57.7378	-159.713	-17.9583	-24.8861	-16.3273	-27.6964	14.0592	4.69726	24.2082	-48.167	87.059	12.2756	65.2669	-38.8057
1763.53	-99.1747	34.3865	-45.6407	33.3005	2.22413	-46.4162	12.3916	45.9189	26.4308	-77.5549	34.1699	29.7767	33.2963	-24.1721	32.9619	-21.1533	-7.04516	-21.3701	-18.2703	-30.9039	-20.7316	23.5326
1765.1	81.2255	47.6788	87.8523	-46.3851	-28.5249	117.311	-84.1368	-25.7166	-26.7087	159.415	12.7387	57.3571	29.8078	-5.20836	-63.1229	5.91583	18.3822	-46.7785	-4.3903	14.995	-34.505	16.8835
1766.68	398.896	16.4689	-21.1981	12.7147	88.556	46.7223	70.3124	-57.6794	-18.4971	104.868	10.6582	-76.4698	29.6675	-21.39	-17.4802	-61.8465	-25.5716	-32.8987	2.0815	-1.65451	35.7731	-33.5745
1768.26	-22.6455	-160.081	-35.1639	-24.9311	25.1668	5.22204	36.2069	33.1603	56.8087	53.6609	30.6768	-12.5659	-29.345	-25.0829	-3.94227	14.4051	92.7118	-1.07486	46.2567	16.1367	-28.6501	-48.0343
1769.84	-24.4286	-212.861	-121.825	14.2693	20.1854	-110.904	88.4427	75.9641	121.239	19.4424	-8.04839	-56.5934	-15.221	41.1805	-20.4582	-14.6065	76.4667	100.838	15.5001	-11.5293	-24.6893	-34.8828
1771.41	-219.716	124.635	114.621	-46.6628	-187.466	23.5569	-71.1386	-40.5816	5.77812	-39.135	-38.4894	22.5513	26.6869	-23.9658	32.3527	62.0162	-54.1232	-39.2235	4.03212	-31.6753	7.82158	51.895
1772.99	187.789	-27.1861	-18.535	-38.264	-148.966	-127.638	-9.70734	148.967	2.55456	-97.7089	15.3558	-39.3262	32.3242	58.1425	44.4722	-8.93302	-36.4564	-58.2643	43.7668	13.2062	34.601	-33.5885
1774.56	31.5316	-15.6675	-27.5864	-4.68556	-8.27176	-14.0029	8.38336	-31.0318	18.8524	3.54421	-53.5133	-78.5663	-72.9085	-41.4742	-35.4868	-16.0717	37.2268	21.6769	12.6976	5.80054	28.8595	-7.75368
1776.14	-271.182	-6.26159	11.8407	43.6075	-11.749	34.7941	-34.4872	-40.5493	7.63636	53.777	14.4349	-1.81707	56.6658	-29.93	8.08117	-7.50212	38.8876	22.2227	-46.0733	14.102	-32.712	23.3022
1777.71	193.172	89.2402	21.412	-8.4791	27.2074	49.6134	-41.0865	-17.5715	13.6429	-11.6598	19.2151	61.5081	35.3056	16.2335	19.3273	28.0227	-46.4361	-12.6326	-10.161	7.32779	-22.0129	16.2412
1779.29	40.2859	68.8276	-5.31102	36.252	36.095	39.34	14.0508	54.7751	-66.7493	8.59842	35.769	50.0827	35.5897	63.4533	36.7662	-8.8631	-28.9398	30.0907	-11.296	-12.3024	-18.2348	-0.116479
1780.87	148.369	9.22386	34.911	-12.3997	18.8509	31.1388	-0.609583	40.0749	-18.0564	42.3677	51.3104	68.4318	23.6828	49.2818	-12.8584	67.1471	3.74538	-1.86208	37.4406	10.3964	-23.6918	31.9246
1782.44	171.528	-67.9374	-5.26299	-20.4583	-39.5801	-57.0166	31.2846	61.688	99.2047	-76.3398	-21.6196	-51.9055	16.5129	30.8548	-8.77919	0.866951	-30.7943	1.00982	82.2049	16.1856	-11.1349	-42.1054
1784.01	5.63261	-104.463	32.0654	-6.98113	-68.7239	-91.9365	47.9254	84.4479	19.3816	-59.5982	-18.935	-38.3046	8.88739	-20.9797	40.2907	-5.14368	-39.326	-50.232	48.9251	-31.8919	-17.2191	16.6037
1785.59	-6.54329	-34.5966	-53.3326	39.1435	-18.4847	-41.7449	9.68634	125.357	-21.746	-60.7367	-53.0265	4.79108	-55.0423	16.7217	0.191325	18.2017	-8.85697	5.37175	-59.6881	4.78998	-60.5939	-55.8019
1787.16	-91.5739	42.6073	-19.5673	2.91479	13.1845	-2.66609	-75.8652	-32.7366	13.6833	69.2712	8.17861	-42.1619	35.0712	-14.2486	27.5163	38.2799	2.25514	17.972	-26.9078	33.3657	-59.7221	-42.1395
1788.73	-36.1378	-31.6965	-12.1834	51.0815	24.4214	-21.7821	20.1912	-18.9469	10.7598	43.4918	24.5395	-50.5411	52.4064	51.2101	-10.8328	-12.7665	8.25365	53.5286	3.21461	28.8617	-0.0555742	-9.14951
1790.3	178.396	66.1346	-24.7266	-17.3386	-8.25063	10.4061	68.3017	-20.5474	36.1049	-50.7065	-53.4061	-25.1304	-61.0933	59.6737	-34.0986	26.2068	-10.6382	-30.6714	7.80456	-18.3482	68.3342	16.5886
1791.88	-55.7675	103.934	81.5959	2.82206	-57.5076	88.5788	1.06475	-28.2769	-61.9865	13.9748	-23.9204	48.8208	21.3691	10.4552	22.5404	-9.99197	35.8592	-50.8575	-7.52912	-59.9369	23.9446	83.4931
1793.45	77.3076	41.6644	-27.2449	12.1756	54.0978	-3.23835	43.1945	-110.091	27.0831	-6.48097	-48.0787	-57.9464	-82.2597	-75.4985	26.0376	22.9283	-35.6606	-53.5471	-47.0755	-34.1313	31.6073	67.2561
1795.02	246.146	-76.3587	5.59099	-28.729	48.6666	-54.3631	83.0703	-35.5561	47.4794	62.2995	-5.17844	-103.787	-0.663944	-49.2355	-42.9978	-23.6346	-25.1472	17.4111	25.6567	27.8268	-10.2145	-67.5519
1796.59	-213.317	-97.5367	103.233	-112.88	26.227	-102.078	-32.1287	53.7763	25.6808	-166.908	-27.0304	-32.0644	-33.4639	-1.39742	-60.2942	-63.656	-73.0071	-10.6142	78.8085	26.6342	29.7128	42.5357
1798.16	-274.353	74.2036	75.9489	-21.7668	-83.0782	34.5111	-136.475	13.4558	1.53848	-192.74	-78.1853	58.4316	-44.8027	-16.4077	-8.52556	52.5321	-38.5921	-54.4685	-13.3348	-36.0222	-17.3664	-5.23594
1799.73	106.768	-55.9546	12.9524	-60.7973	4.33669	53.2126	-44.807	-4.65593	-65.0337	84.7364	32.864	-0.514863	94.694	-33.2307	50.3698	32.8286	30.2309	16.29	4.92316	-0.43903	18.1521	-33.3605
1801.3	-23.2159	0.893909	-78.7951	78.6006	102.385	-29.4602	85.9606	-47.7854	-71.7518	78.968	35.1691	-2.8652	-27.5185	24.2102	-16.7435	-19.3006	50.6484	83.5747	-27.731	8.54001	20.2889	9.98493
1802.88	129.328	-1.46631	-18.6604	-57.4532	-34.1591	45.1393	2.65556	24.4979	10.1325	-15.3345	-14.1654	-9.15429	-9.71006	31.0099	16.4251	56.8061	16.6076	-44.2394	22.6012	-23.1804	-3.22823	-35.347
1804.44	39.7037	48.4237	66.7784	34.9428	89.1628	27.6643	-55.9443	-18.4732	-35.074	-22.2959	40.4733	82.8741	35.9704	-11.2485	15.1836	37.4611	15.944	11.1707	-23.0562	-10.2846	-20.7729	39.4952
1806.01	-154.897	-79.5901	-21.2546	24.0559	-13.8884	33.9442	-61.5081	40.0374	-76.4831	120.245	86.7736	72.7324	48.1793	-13.4287	65.3725	60.5191	24.8284	-27.9785	-93.913	-0.106196	-51.4678	-44.0779
1807.58	226.377	8.5066	92.1261	-119.672	-65.9115	21.684	-57.4597	24.3005	-34.6244	124.178	58.152	69.0279	72.1639	79.2549	-42.7821	35.0751	-40.2677	50.2851	43.6018	18.7682	-4.98884	-12.0707
1809.15	-259.273	133.373	109.741	-46.6925	-101.732	114.396	-134.85	-67.3243	-1.43848	-16.0912	-60.6754	3.57295	3.58099	-10.7469	-23.0886	-26.5845	-56.0633	-14.1979	45.0151	18.2574	76.0162	49.4798
1810.72	91.0038	-17.5925	-10.3239	71.2148	185.343	15.4627	35.6985	-125.618	1.01484	42.9449	-31.9578	-48.9352	-66.7167	-82.5457	-2.47653	-23.5081	32.1292	13.5452	-31.7633	-25.6519	78.2695	62.3286
1812.29	32.5002	-73.0872	-53.5474	55.0409	104.766	131.315	30.5695	-28.1195	-16.0418	95.3293	31.1077	42.5316	47.8625	16.039	52.2473	15.2172	45.7963	48.3946	-31.321	1.71007	-14.2827	-16.8532
1813.86	-242.503	-24.9278	-1.16124	79.9432	83.6592	-4.7657	51.8112	-2.47318	-55.803	6.36637	47.784	73.812	-66.1692	37.6706	4.92976	3.61812	25.3555	33.94	-32.1765	56.4629	-37.5606	-23.3607
1815.42	-109.725	34.2419	50.1612	-18.8557	-1.6515	55.745	-35.449	-38.7683	-6.9515	48.8907	29.694	-33.7781	59.3299	-5.86605	-19.263	23.5085	-29.5047	-17.1227	26.633	6.07798	-1.68669	6.6582
1816.99	-89.1513	-120.537	0.139887	71.0952	12.9685	-87.3112	5.52789	93.1733	-45.5531	12.0637	75.7332	12.0726	71.6491	-53.4963	-8.14803	18.8583	35.9414	27.9127	-65.8449	-29.5151	0.214864	41.4917
1818.56	286.271	17.2644	-24.2949	-21.2931	-46.7664	-11.9315	19.4865	31.0855	-12.2283	-10.118	23.2871	-7.58212	3.64741	0.593486	57.6916	17.8765	-34.5464	-87.9403	-37.3504	-18.0657	42.2297	15.0801
1820.12	-136.395	46.2946	-61.7594	-55.2511	-82.2701	23.5459	24.2174	4.13369	42.2482	-92.9705	-41.8153	16.3557	-31.6767	52.0704	34.0548	-37.9755	-19.2481	9.17815	23.8278	-15.1969	13.412	6.0799
1821.69	-170.174	-41.0866	-58.8854	23.0277	-74.3762	-102.895	41.1634	11.0281	52.2958	-60.0918	-55.2728	-114.127	-73.1492	-3.3557	-28.9662	-86.792	21.6844	6.26005	-23.2998	44.929	24.2437	-47.9258
1823.26	82.2148	-157.217	-87.4234	78.9065	170.825	-205.296	128.005	-28.6294	35.1466	29.2415	-6.615	-104.855	-149.696	11.9998	-72.4545	-60.479	37.0253	58.3204	-52.9872	43.7147	21.1585	-9.65142
1824.82	-171.033	-49.4715	-60.096	8.4423	-59.5285	-23.9289	-2.69431	-9.27074	34.6573	24.8305	-10.9307	1.60008	-11.6263	-7.95537	-41.0609	40.5858	63.6154	-13.9873	-34.9602	1.55284	-21.3193	-7.34959
1826.39	141.968	158.764	68.6038	-83.0079	-36.7477	80.646	-75.4551	-50.5637	-38.0159	44.8668	1.59218	71.8964	71.3182	15.0885	-34.7697	20.8501	-19.8035	20.474	8.79635	17.8636	-34.0429	48.4391
1827.95	-110.01	98.1041	58.3548	-57.2689	-79.8031	93.1892	-61.9955	-32.0477	17.8098	47.063	-14.039	-12.7658	67.2364	-8.99922	-26.5041	9.96799	-30.2453	7.04078	93.918	-32.0333	-11.7015	10.1499
1829.52	93.3757	-65.1616	-5.80396	86.0453	126.611	48.9736	49.2587	86.9252	17.1195	15.0552	63.7785	2.78174	7.66595	-21.6099	41.5733	7.75612	1.48046	25.247	8.83452	18.0682	17.9228	-26.8002
1831.08	422.339	90.1528	10.3634	-29.4082	88.9946	44.5483	-39.3907	-6.71588	14.7556	-18.6926	27.6293	-13.2123	55.618	-19.2121	17.6932	11.8707	-28.4462	-40.2898	22.3742	-9.23433	19.4139	11.3966
1832.64	-156.886	90.3476	39.6012	33.22	48.8316	32.6167	-16.2297	-35.5251	-11.4961	-72.8312	-43.8736	28.1573	-12.92	22.2814	-2.74476	-34.1767	-30.3302	-0.000191946	-9.55231	16.7681	7.90288	-8.6524
1834.21	70.3781	55.2502	73.9876	34.4286	-1.27157	-37.8236	-37.5862	-32.924	-55.5548	45.0379	-14.869	29.001	4.91644	-37.4222	36.5	-11.116	-3.3391	-31.3109	-71.9311	-14.9749	27.4262	33.5321
1835.77	-202.201	20.9598	8.29245	69.9935	29.4191	43.2822	57.2497	-93.3524	-71.1056	239.158	-10.8056	10.0536	-34.7682	6.68463	-18.6671	-8.1888	47.1675	71.161	-70.0604	-4.62295	-7.86171	41.0502
1837.33	-335.906	-28.6817	-88.6352	48.7282	-49.2608	36.9407	29.7103	-54.7275	-0.762649	6.01497	2.7945	-26.3985	10.2249	-90.8582	34.1624	23.1472	15.648	-61.3162	-21.971	-11.5047	0.505317	-29.2862
1838.9	-51.4952	68.8359	28.3762	-17.9212	6.7081	86.9811	-46.2766	-24.5035	-27.1331	37.9502	79.0553	50.9573	62.8258	11.1198	71.0924	59.4401	-12.777	-2.76781	34.7841	-13.6373	-50.8377	-0.483539
1840.46	-361.904	-107.163	-36.144	-55.9927	-16.9473	-89.7172	-7.2946	73.4281	-12.0254	-118.054	-2.26647	3.20833	-60.5744	-20.8804	23.7185	28.2839	40.8337	-31.6286	62.9951	-0.85109	-19.9922	-58.027
1842.02	-94.6456	-39.8404	-5.39475	-15.0253	94.5009	-66.4307	42.2283	58.9747	18.057	-86.4988	-5.49664	-23.1274	-67.7792	5.73627	20.4206	-19.8004	-2.18022	-13.6127	-16.9697	16.5068	19.2496	11.7079
1843.58	61.4148	-132.666	-51.5603	-44.6213	-77.4769	-142.329	-33.0431	2.48718	23.4913	-6.29799	-15.2524	-104.043	-34.4473	-39.0393	-46.7431	-19.6468	36.1236	23.1964	-0.28922	-34.6898	-35.4023	-16.7763
1845.14	-91.9119	-64.4465	-16.3244	83.806	11.294	-71.8853	34.9886	-24.3283	10.2643	-25.8247	-39.3075	-22.3493	-95.967	16.7626	-40.8124	-54.6148	-3.84066	46.0388	-8.26504	19.3471	-20.4806	-31.3136
1846.71	140.107	86.4823	85.7542	-8.50207	-41.2503	81.8383	-50.504	4.3948	-22.8075	69.884	15.256	91.9096	65.7496	2.50016	33.0178	20.6294	-26.3285	-12.9017	0.409316	-7.5505	-54.8368	-2.84198
1848.27	159.067	32.4208	57.1304	-64.4164	-78.7336	78.721	-11.4184	24.361	-6.92598	130.601	30.4456	14.3512	112.961	83.7511	48.4195	31.5043	-9.6474	40.0604	47.4634	-18.9606	-38.8882	28.2796
1849.83	209.635	65.7733	-7.22693	50.832	36.4204	16.3078	39.8519	-40.8691	77.5276	-27.4931	-3.77602	-17.4033	9.77799	-10.4311	5.41741	10.3283	-44.4066	-51.1888	28.204	-18.6755	-19.5953	-19.9596
1851.38	231.873	-15.1161	26.4098	37.4715	51.4643	-51.4946	41.0182	31.8256	0.222481	-8.86822	35.6207	10.5668	-0.170598	1.4597	17.9574	-10.2679	-26.1981	-10.0054	23.9153	-24.8389	22.4269	2.31959
1852.95	-125.296	-30.0169	13.2923	-1.50751	-47.9545	-82.1032	11.2163	41.549	21.1565	-69.6726	-2.74537	-11.7363	-8.28615	11.0866	14.2984	-0.317138	32.5057	2.50842	-5.53521	-30.1171	29.8174	8.82319
1854.51	-116.213	21.3822	-34.7905	38.7986	-43.7705	-36.0208	49.1418	-12.6293	27.858	74.9624	-10.6818	12.1141	16.3902	-7.60031	-7.15508	-14.6689	29.5504	27.452	-44.31	-19.3387	8.40987	23.1953
1856.06	-204.1	-56.1566	-103.023	90.5134	-21.4498	10.7719	76.6537	-96.1457	49.1291	157.377	-58.8457	-37.8958	-95.9187	-44.7061	-68.3192	-12.8277	105.998	41.548	-37.4607	-34.6651	15.3942	15.6257
1857.62	-278.92	-43.358	-91.9981	65.315	11.7225	-13.1663	15.5812	29.436	24.683	-5.73654	8.01028	29.9357	-72.4712	10.109	-14.24	-17.8757	39.1569	-15.5671	-18.4521	-11.7319	14.173	-9.0506
1859.18	-72.6581	16.9065	-29.4673	-21.6954	-10.2906	-77.0439	29.6678	8.38576	14.0376	-71.8369	-46.0767	40.0847	-93.617	20.1355	-54.622	-43.9861	1.74932	-1.97963	-28.253	-8.74204	2.96056	15.1072
1860.74	222.994	-117.847	-13.612	-61.6636	-60.5049	-87.5824	26.4492	34.5165	41.2689	-2.30408	-1.76182	-93.5752	74.8443	17.8565	-24.2561	-18.0907	-10.1631	44.2001	62.4941	3.17901	8.81665	-33.1486
1862.3	11.7783	34.9119	-10.9969	41.2324	-8.22842	3.58666	31.5799	-77.9439	72.5965	-52.6199	-60.344	-63.3268	-81.4466	-73.8469	-65.1049	-18.5396	-24.7416	-8.08906	-2.47988	-8.6819	-30.762	-66.7423
1863.86	-42.6097	-33.6595	69.4735	-27.588	-46.7229	-9.47749	-53.608	21.2963	-53.4283	-77.0912	-20.0467	-9.56753	-69.8072	-25.0175	10.4945	-20.0676	-44.4504	-23.4358	3.15637	-21.4151	14.5642	5.02978
1865.41	-143.798	3.99439	58.2161	8.2728	-73.5651	25.9853	-50.5762	47.5108	-36.503	35.5375	48.1366	32.698	7.82615	24.278	78.1731	41.0166	12.1695	-31.8695	-11.2348	-28.3949	-24.6879	18.0894
1866.97	24.0279	28.8126	10.5563	-25.2821	4.31211	70.228	-32.2847	32.8134	-35.7501	142.244	62.1429	81.6283	54.7896	-0.302681	46.3173	70.7577	19.5741	-45.3875	-16.5066	5.51845	-47.0936	29.1454
1868.53	158.419	130.462	4.22019	10.0803	-2.6661	123.503	16.4424	-119.106	-8.21151	129.652	-56.9498	-1.09669	16.8373	-17.128	-17.9307	25.9888	26.5186	-13.6616	-24.1594	-4.53174	51.4145	38.6656
1870.08	66.5472	7.80017	-1.45333	-16.6657	28.7059	-18.8198	22.1391	32.6733	23.6599	-77.9665	-20.7373	-0.354424	-24.8029	10.7047	1.68543	4.08138	1.77628	-37.4133	-4.64135	5.4703	41.7204	-7.56144
1871.64	173.416	17.0827	-1.03382	-21.2347	43.4846	-9.27096	27.6718	-32.4399	-11.7492	-8.55677	-34.1498	21.3415	0.288495	-26.2538	-23.7652	-34.9596	3.72397	18.6966	-7.02401	-7.35729	17.8544	47.1157
1873.19	160.477	50.0582	34.7423	-22.7592	50.1386	44.4109	22.6064	-34.4046	-8.35296	29.8642	-6.32537	15.014	70.9972	-17.1728	-29.8562	-28.882	-24.0508	43.9664	30.8657	30.4766	-7.18112	16.0021
1874.75	-185.342	132.854	53.6329	16.1497	-15.9306	90.603	-47.2955	-39.8912	-53.7076	46.8797	12.2989	107.522	0.777432	4.75904	-14.2313	55.4965	-1.20398	2.16654	-25.0843	6.96651	-39.8891	3.48516
1876.3	-89.3418	80.97	9.63255	-9.17451	-57.7238	35.2337	-59.7294	-30.8091	-68.4652	70.4221	-2.95021	33.5331	0.498702	17.2709	26.9938	26.0906	-29.1139	-15.0701	6.21327	-0.542331	5.73772	56.6721
1877.86	-241.07	10.6575	-3.70742	25.1876	-57.2634	-9.95412	-36.7696	22.4615	-38.0979	18.7117	14.9156	45.9099	-5.98093	2.00415	40.373	10.7977	-1.07194	-22.6869	-56.0218	-17.7904	-22.8486	27.8628
1879.41	-78.1664	-26.1498	-1.29973	-17.9721	11.913	29.1599	-30.0611	-60.6071	4.31659	31.4153	-14.7619	-18.1569	-6.72164	14.1094	-15.2283	8.43859	28.9272	0.863395	-12.5195	9.40981	-12.1653	-10.5134
1880.97	-72.0623	10.1947	16.2799	18.7153	-30.5383	43.9786	3.16631	-77.9065	-29.0672	68.132	-38.5197	-15.7951	26.2812	-3.35005	-19.6523	25.4348	58.9116	33.8563	-17.2414	8.67236	4.05237	-10.8942
1882.52	-21.5515	-106.773	3.01609	-16.7965	55.5639	-42.2922	21.8564	50.9573	25.1806	-26.6675	0.759207	-37.8674	-6.78465	20.7374	-11.6995	16.6871	52.6385	10.0706	-20.4502	34.261	-2.43623	-15.4819
1884.07	36.5076	11.4417	-11.2988	-33.2875	-25.92	6.40059	-30.2025	26.8601	27.7887	8.43696	18.3535	-39.2022	66.9941	-10.0798	-38.5527	2.13433	0.724757	6.26821	7.44587	23.0372	34.2762	28.9713
1885.63	21.313	33.6698	3.9518	-36.3287	-66.9442	-14.154	-41.0725	62.6969	-6.61649	-77.0853	13.0873	-2.18548	70.8535	-7.45018	19.1126	-22.3095	-37.5762	-29.4996	33.7889	25.7922	-17.8072	-24.8859
1887.18	168.177	16.8149	18.488	43.6223	66.3789	19.7876	17.9538	55.1718	-21.2882	-7.20529	48.6969	13.3195	39.9396	-3.5234	30.3192	0.760077	-30.3442	7.34676	-4.92021	15.5801	-6.58258	-34.9152
1888.73	64.9199	111.958	42.9858	13.3472	32.9128	35.2097	-15.183	-33.9959	11.0706	-37.7635	-5.69869	-3.46481	-1.00042	-32.8061	20.8246	-17.8688	-54.9289	-16.4537	22.5052	7.0087	19.0589	17.7479
1890.28	-104.836	-18.1065	-19.9803	47.2315	44.2968	-28.9475	15.0477	37.0907	23.9448	-90.591	7.99108	12.1725	-54.5126	-35.8981	-5.77649	-8.82558	-20.274	11.9995	-30.26	10.6373	-4.5977	-41.8849
1891.84	-23.5594	-25.8131	-0.307069	-24.2571	29.7559	-19.8045	-10.4672	-28.5064	16.3717	-79.86	4.237	4.66461	-31.7743	-19.6596	-18.9946	-12.5869	21.1416	22.868	28.834	21.0739	9.0792	-38.1583
1893.39	29.0038	77.0855	42.396	-36.4614	16.2675	46.0645	-48.7687	-71.8279	-29.1815	21.0471	8.82443	40.0254	27.006	-26.6031	-16.415	-2.32694	7.89906	2.01253	11.1135	5.93671	-27.0473	26.3379
1894.94	83.0123	37.7033	-4.05562	-18.2176	29.1402	47.0794	-0.318648	-17.4799	-2.60581	61.8307	27.2135	20.8547	17.0778	42.8854	-21.9112	-5.8052	14.1059	7.18878	3.46423	15.5617	-5.37801	-9.20427
1896.49	146.632	27.2934	10.2479	-7.87324	-9.36752	5.64653	6.43268	15.5451	-16.0028	33.5727	36.5679	-19.061	34.2912	12.9671	26.0511	-28.77	-37.3207	-18.0562	6.10446	-9.6612	39.5474	20.6617
1898.04	96.2884	-77.0374	27.3913	-18.3068	-47.153	-21.9575	-9.27774	87.6914	-23.381	-40.5494	32.0231	-8.30088	23.3527	38.0269	38.6203	-3.90251	-10.5899	-49.3763	43.9386	-14.9631	5.9438	-22.8933
1899.59	81.3565	-77.234	5.9058	59.6525	90.8358	14.9314	52.6413	23.4414	-23.5016	-28.9239	13.3802	-28.161	-24.186	26.7554	-15.7064	-6.77311	32.2785	9.41177	7.42553	3.29735	11.5852	-15.6958
1901.14	-47.1186	51.035	39.7457	39.4539	39.7224	77.8613	-24.3466	-38.8415	-36.9277	4.67318	-19.488	26.1238	-38.3572	9.53572	-23.8985	-2.50879	28.2295	-16.341	-12.5484	12.6843	17.9274	1.37656
1902.69	38.1679	-42.4917	-4.53979	46.0854	-7.6578	23.5388	-19.8371	70.4468	-30.3993	-0.131348	25.2969	15.9481	0.143729	14.9682	3.93012	24.7984	31.4398	-5.64893	-21.3207	4.63201	12.6112	-47.3629
1904.24	120.065	-36.9473	-31.6646	-24.7484	-0.717321	-54.6186	-10.1108	17.057	34.0497	-67.6036	-6.65343	-20.6905	-8.83811	-9.70207	-17.0204	3.88987	3.15964	-19.5216	10.0297	6.44979	33.3673	-3.55889
1905.79	250.123	71.5542	14.7026	-45.9404	18.1132	-2.38499	-33.7882	-47.7933	-4.86049	-29.0148	-27.9606	8.93581	46.5267	-34.8098	-37.5149	-29.2801	-44.099	-23.2352	12.1681	2.49659	20.2647	48.7872
1907.34	-144.48	50.1042	-3.21551	-14.0998	-64.9027	8.84369	-0.308947	-8.39052	39.7929	-53.4079	-20.8415	-27.3118	30.229	38.1983	-5.54918	-13.7792	-48.399	2.36182	9.38842	-14.1734	7.16159	-17.5616
1908.88	-11.9888	-25.9174	22.5337	-29.6767	-67.0505	-56.5239	-9.19674	42.5272	1.13103	-84.1004	11.5991	-9.32124	44.3168	25.9515	60.2417	11.0682	-43.6886	-25.6895	-14.1436	-7.45891	15.5758	4.22019
1910.43	44.1309	-83.1944	-44.4673	-21.6613	15.9818	-96.76	7.84896	21.7055	16.5159	-61.8614	-17.9399	-24.5824	-34.3302	18.814	-0.392784	-2.04792	-10.7696	15.9925	-27.0323	13.2749	14.2112	-11.818
1911.98	-1.62391	-62.7452	-49.8757	-3.09017	-18.6534	-17.1303	20.1287	26.7273	3.29461	-47.2086	-4.61069	-13.6949	8.41613	37.0493	3.79116	-12.2027	13.2637	39.5692	-20.8191	21.342	8.03362	-44.2969
1913.53	21.1298	-1.27937	15.799	-10.2905	-56.8988	53.6231	-65.2541	-11.562	-27.9364	55.0454	28.0513	46.5969	57.9818	21.9059	37.5421	-29.6793	-10.4259	24.4412	-27.2528	8.98971	-28.3195	0.600715
1915.07	36.4339	7.29221	-43.4812	39.7767	-12.4292	53.1627	10.5772	-49.6093	7.78055	155.271	9.71084	-22.3837	3.13816	3.84004	-0.754433	-15.2201	34.8004	23.1863	-25.1622	-4.12297	-10.1292	1.46708
1916.62	-44.5278	-15.8177	-37.9703	-7.36292	16.21	13.9813	-1.34551	-14.9595	23.1838	70.6463	2.78674	-20.5309	-10.9917	-35.0138	-11.5606	-22.303	-5.23948	-18.5763	-6.76625	-5.04763	-7.81679	20.6868
1918.17	78.8999	33.19	36.3076	-39.8725	10.1792	28.7836	-44.5809	62.6317	-42.9342	-7.56646	49.1399	54.9128	36.9058	-8.11269	21.263	3.97355	-27.9528	-68.0601	33.555	-10.4926	1.42401	34.2186
1919.71	-94.5741	85.2787	49.3904	-26.1859	-21.1844	40.8499	-22.5532	10.5015	-5.36909	-36.3632	-8.20635	-6.73879	18.2967	15.1108	2.00498	13.8843	-38.0282	-46.0205	28.2264	-15.692	6.62946	4.05574
1921.26	113.194	42.487	49.491	-30.6293	3.98241	27.5539	-11.8703	-25.055	-38.0108	55.1382	-15.6853	4.46127	-0.741596	-5.79437	-13.5858	22.3572	5.42697	-23.1485	18.9607	9.68794	12.1104	24.4457
1922.8	97.8864	13.0557	-2.22917	8.90764	14.3954	-11.9183	-21.5432	8.41304	-23.436	48.7854	9.68568	5.82272	12.7455	-13.2334	-23.2359	2.39359	24.547	-18.9303	1.97571	7.16415	-3.06799	-0.270944
1924.35	115.353	-11.9873	5.83283	-81.01	-38.6951	-33.6976	-40.639	45.7472	11.1918	-66.869	-2.53702	-5.48053	21.3537	-11.8987	-34.7384	-14.9086	-20.0062	-16.088	46.1635	4.14993	-3.02797	-12.906
1925.89	-11.8841	-9.39232	12.4377	-38.6194	-105.283	-31.6827	-37.92	5.87275	4.78973	-44.5509	-7.80868	-8.33166	9.66045	-8.83113	-0.571414	-6.75115	-27.3949	-12.6987	18.5961	-17.2296	-34.3388	8.47797
1927.44	-85.7029	-10.5592	-27.5128	17.4596	-80.7864	-27.1102	30.511	-21.8764	12.9723	35.7094	-32.7269	-22.9957	-16.0918	-16.4221	-11.6324	4.87182	51.5322	24.089	-9.38011	-27.7329	-28.8481	23.2262
1928.98	-28.5585	-1.20174	-1.25268	-4.67736	-26.2538	-30.9432	8.73796	32.6782	0.103887	-48.6703	-14.7827	5.58062	6.79867	-17.0044	17.8806	20.23	8.31702	4.96876	-26.9582	-12.2544	-25.5094	0.302177
1930.53	198.414	-49.8954	-0.971786	20.5265	28.9948	-31.421	35.4911	68.8867	-15.035	-37.0353	23.4941	13.9048	7.75356	6.06573	33.5351	11.1196	8.72315	-18.8411	-13.7033	-13.5006	-5.60595	-19.1035
1932.07	228.068	-54.4604	-6.76296	15.3921	73.6031	-10.9694	78.637	16.2346	4.9005	13.9837	-19.1583	0.114775	-25.8	22.9403	-23.1108	-15.9171	8.89116	21.8126	2.34342	-10.3777	17.8149	4.2898
1933.62	242.492	28.0774	8.64666	14.6952	40.1086	-5.13352	49.6116	3.83139	-0.0288503	15.0792	-12.0784	10.8937	1.50249	46.2045	-30.9007	-19.2339	-14.6145	17.3753	28.6775	6.07979	22.9959	23.7659
1935.16	176.785	7.44756	-0.450787	2.73546	18.9347	-32.4249	24.1106	35.057	42.8891	-48.8385	0.207467	20.2719	15.4244	18.7674	-36.2946	-4.18694	-30.7153	-28.2956	38.0055	18.3788	0.402521	9.24846
1936.7	37.5572	66.1106	-91.035	-3.1818	2.60719	-37.3866	29.7056	-80.8134	81.1306	-22.0418	-61.7588	-59.9699	-65.8908	-1.18111	-56.3758	-0.511194	-31.1994	-2.93657	12.0098	-4.83883	6.02703	6.40066
1938.24	-77.2502	25.5091	-39.8128	38.7613	-44.2738	28.1254	40.0608	-76.5297	-0.161043	46.482	-38.1267	-26.8776	-37.5513	6.22277	-8.66891	10.25	26.5772	9.70292	0.992642	-18.1257	-4.30907	7.45291
1939.79	-130.56	-33.8811	-30.9253	23.3366	-11.4646	-5.06931	15.0394	-13.5457	-14.6806	43.0953	13.1802	2.84673	-8.97371	0.600958	13.703	6.05325	38.084	21.9904	-15.5396	-19.321	-28.044	33.1528
1941.33	-31.1644	2.61402	-8.94002	24.3545	13.4407	-29.784	9.37542	2.49016	-2.38445	-9.22444	-8.91963	-32.6635	-15.1173	-7.39825	40.6374	6.76322	2.55001	-3.05204	-25.2837	7.54736	13.2489	-8.08082
1942.87	-10.665	-101.564	-5.2735	8.19096	-25.536	-29.5096	-1.20684	37.6596	4.55304	8.28376	11.2898	-16.3414	7.67148	3.86902	47.7577	-2.93199	15.5601	-4.44477	-3.41668	-5.67421	-22.9768	-36.502
1944.41	10.7627	-111.643	4.56038	-16.7891	14.373	0.505333	11.227	38.1778	-7.39301	47.5362	-4.75942	21.8326	-13.0466	10.1083	28.0714	3.77406	26.3611	6.82679	-1.24482	-19.7178	-17.3626	7.48527
1945.95	88.0853	-26.5767	19.7875	-24.5635	51.8484	-30.4483	14.3321	69.9476	5.60131	-49.8936	-4.97455	15.0091	-13.0876	32.5048	37.9102	-0.581936	-38.4	1.76183	1.81135	-0.285376	10.2755	9.29811
1947.49	-62.4582	25.9474	42.1253	-39.6762	-4.83972	-2.65887	-37.8566	46.4155	0.610323	-92.8329	4.97124	56.2176	-31.2331	38.4035	23.5329	1.56582	-46.7971	-9.51773	24.5117	3.06794	-12.3514	3.70069
1949.03	-99.0451	27.3132	-32.9271	23.7392	38.3263	16.0455	14.2994	-42.391	2.34288	-27.8917	-35.1549	-19.1543	-44.5801	10.6084	-8.8154	-14.2525	1.90186	53.8501	-31.6908	-10.2273	-1.57503	-30.7156
1950.57	-96.372	79.6946	-3.0865	36.2724	28.4059	78.5093	15.4552	-55.3805	-51.2622	61.2895	-9.64251	14.3565	10.5507	-0.867188	-7.02053	-4.47818	11.9286	32.0117	-17.5879	-13.4237	21.5316	2.3492
1952.11	-311.659	74.8387	-21.32	37.3063	37.0405	37.4877	15.147	-28.9872	2.9053	4.95985	-5.95083	-0.606319	-64.883	8.74244	-15.3432	-2.74152	4.84464	40.1594	-42.9965	-13.5787	17.8888	18.2736
1953.65	-147.772	23.9668	-34.5222	24.0503	-3.09407	-80.7811	3.50342	28.8166	38.0992	-142.85	-12.8645	-24.9445	-11.4453	-7.30674	27.0497	-18.4424	0.236512	2.06082	19.3956	7.08804	49.238	-33.9507
1955.19	-171.1	-46.83	-19.7758	-28.7207	-90.773	-55.8903	-20.2823	84.6373	16.1228	-82.4139	46.3986	28.7547	36.6293	17.089	46.2654	5.75109	-7.08425	-3.24869	42.7558	-25.2859	-26.8831	-18.5168
1956.73	9.73463	-114.16	-41.8461	-25.22	-52.4204	-23.2747	34.7535	122.485	-15.6027	-36.7832	36.1688	34.6443	56.2343	33.3636	52.3894	35.2275	7.47766	-13.19	30.4997	-20.7201	-29.7698	-25.4497
1958.26	59.4534	-21.0196	-32.3657	3.40242	-30.5401	-51.938	13.9933	107.526	-6.54752	-44.3422	58.3446	-2.78746	51.4423	32.3753	50.1566	18.7238	-47.7241	-24.8805	-2.06845	-16.6923	-11.542	-31.5878
1959.8	-43.6503	116.341	-9.9624	56.2673	30.9513	35.0742	37.6291	-88.2721	-40.6449	49.7169	-19.6107	17.2696	-33.2121	-15.2134	-5.58249	-42.1976	-10.9405	15.9794	-36.1646	-11.8981	-3.97771	27.3827
1961.34	152.971	2.95786	11.3791	10.824	74.3395	22.7529	33.1389	-68.6697	-3.15987	17.8644	-33.2919	-34.8506	-29.7342	-13.2995	-42.1355	-38.159	12.2595	25.1629	-8.64385	21.5744	26.4147	-9.39652
1962.88	-93.8108	12.2272	30.6405	-5.72103	-28.6147	5.81092	-28.6587	-70.4009	6.37252	29.4703	-22.6831	-21.3887	-26.9089	-27.4764	-44.4788	-16.3912	8.7424	4.27033	6.5171	14.9987	5.83312	12.9074
1964.41	68.2659	-5.29399	10.6641	-20.4519	-1.01794	-24.4389	-13.0945	-9.4804	35.8643	-22.5112	-7.16584	-15.4948	-57.1097	6.97305	-46.8795	16.9183	-11.6115	-13.2824	36.4525	27.1136	13.7597	20.5159
1965.95	52.1054	-1.44659	-3.99929	-14.4806	11.6624	-34.6847	-16.2328	27.3362	6.58724	-50.119	31.3506	18.1692	-0.0860398	-9.95129	15.539	9.28781	-7.00738	-20.8339	25.1224	9.80243	-4.9329	-11.5652
1967.49	59.5042	-8.38712	31.8531	-9.32541	-22.5604	22.5888	-32.6625	71.6554	-27.4181	68.7722	79.566	12.5291	57.1404	-15.3018	46.8519	47.1433	-29.2806	-27.4709	-5.09393	2.8861	-16.7901	5.0066
1969.02	109.138	-89.2107	-11.6129	-5.63243	-16.1127	11.3193	-1.74803	73.9274	-44.2525	47.5371	57.7189	-6.46854	65.1937	-27.119	23.6252	40.6647	-4.26815	-13.1827	4.51027	13.6325	-15.6636	-41.927
1970.56	-10.3422	22.0074	-32.6526	2.86972	-16.3579	17.1408	-10.4501	20.9708	-6.76325	34.9295	25.1888	-3.28154	25.7951	-21.4664	3.61258	43.1753	-13.8097	-23.832	-23.3373	16.7675	-28.9181	-9.39544
1972.09	-24.6481	77.851	14.1105	-16.4883	40.2712	21.0331	49.2523	-91.0242	21.7321	-6.44284	-70.0534	-12.534	-70.0955	-28.6484	-51.2573	-26.2543	16.4531	2.56424	-19.8027	34.0778	12.4204	36.0525
1973.63	40.8682	65.8215	97.0074	-63.7674	-15.9526	35.3755	2.20342	-83.8521	49.2361	-63.8685	-73.1024	-32.1692	-38.5969	57.327	-51.2664	-14.2244	5.54542	0.442636	36.064	24.6064	19.5273	29.5844
1975.16	-77.4617	-89.187	63.4495	-25.115	-30.8081	-70.2772	16.2094	33.6319	18.8618	-136.054	-32.3414	13.2966	-44.1377	5.76005	-23.4899	-33.1577	8.59552	5.42475	21.4309	4.35394	-16.0418	-17.7106
1976.7	281.607	-53.0382	-9.00475	-45.5405	11.739	-3.87588	33.4784	-15.6234	31.1391	40.7375	9.33367	-24.1908	44.2281	-3.01372	-6.73475	5.6322	-8.06547	16.3448	32.7073	8.69432	-10.9923	-22.266
1978.23	-40.1741	21.6794	17.3319	-0.977213	22.1298	66.8245	-17.7223	-53.5344	15.6117	38.3174	21.1907	-8.15698	52.2467	-16.5625	43.3823	-6.8798	-9.83945	36.8204	-9.16964	-14.6947	-26.2883	-21.4867
1979.77	112.761	12.1187	75.4558	9.91898	26.729	27.4245	-24.8593	-6.15135	-15.1391	74.9194	53.0417	8.14969	69.2023	-22.0178	17.6197	3.2971	-19.6318	23.651	6.96257	12.1074	-17.463	4.18016
1981.3	-86.4482	-16.2061	-30.0026	34.1539	57.4052	10.8997	-1.29317	-51.8502	-37.6455	49.9588	-4.9696	-25.5502	-11.4148	-56.1708	-15.9142	-50.0839	22.0235	27.3844	-18.065	1.38308	14.3136	12.6737
1982.83	-178.39	-7.26811	-49.8232	17.578	10.9002	4.43894	9.71623	-32.5768	6.80997	40.3467	-10.9541	-21.5654	-44.1434	-24.2673	-21.2547	-14.0025	17.3597	-11.0454	-27.95	0.76101	13.1194	39.8653
1984.37	-36.2443	17.2714	31.817	0.00952201	-31.8969	28.0699	-8.53367	-10.067	-7.62366	-3.62314	-2.21462	15.8843	-1.57968	6.45442	-9.42289	-7.62087	2.64326	-28.691	27.3	2.74558	14.3816	1.48127
1985.9	4.99986	80.4513	79.2667	8.73364	2.71823	25.0178	-11.2507	-10.1815	5.90077	-27.9953	-20.373	47.7109	10.6795	34.9438	4.8557	3.0002	-22.2393	-23.7005	15.6625	6.42666	7.98327	19.9623
1987.43	23.9451	-17.1649	-36.6234	35.1718	56.9561	-50.0662	43.1437	19.4846	18.1247	-33.069	-10.7408	21.7022	-31.5698	-15.0502	-8.14991	7.58165	-10.9005	-18.1165	4.15053	2.45087	3.32188	-22.8602
1988.96	-129.226	8.23213	-74.8732	41.8989	2.56298	56.3449	12.6353	-75.8147	-8.72351	160.972	4.00503	-18.6458	35.3736	-39.9574	-7.7829	49.285	53.2728	28.9794	-69.2479	-11.2175	8.30412	-1.08464
1990.5	-216.829	7.14522	-51.3192	35.9322	41.0613	83.1311	0.705418	-59.8374	19.7416	78.2246	9.40784	9.52292	0.014604	-30.5484	10.8225	59.1434	37.9899	14.2848	-80.7412	-0.558091	5.70895	17.505
1992.03	-142.233	-6.21691	5.14122	-29.9185	0.432378	-19.7234	-23.2089	1.85929	-27.9951	5.34867	29.3807	41.6424	-6.91915	15.6839	0.0423285	8.11933	3.61447	-0.973557	5.25793	37.0131	-14.0031	-9.42905
1993.56	-89.64	-29.0509	-25.6745	-13.1808	21.2912	-20.8016	3.94389	-1.23176	-15.6791	-2.35374	-1.77809	-24.2134	-16.8191	11.415	13.9111	-23.8445	-11.727	13.9337	-27.066	7.4568	2.72181	-7.07525
1995.09	-73.3277	9.98324	9.35363	-17.9958	-78.3934	25.4545	-27.1082	-6.43811	-25.614	59.796	21.0313	-11.7038	31.8036	37.4451	-21.554	11.5084	4.82742	2.62716	-6.31766	-21.0051	-1.05395	7.97587
1996.62	-43.4215	-24.6543	-18.0149	-1.376	-25.7669	-30.5009	-21.4426	-5.40467	20.5958	-55.2829	-27.7402	-18.6624	-35.6668	-5.84349	-31.005	-12.0142	13.474	6.27834	8.53798	-12.7297	11.7068	-4.96993
1998.15	51.7593	-43.5331	14.9725	-12.8439	3.55582	-68.2834	-20.0082	45.2666	7.25193	-67.7298	-25.0818	-10.0266	-36.3731	-1.77182	-17.9276	-13.9559	-0.691169	-2.87447	25.1873	1.60651	9.5225	-2.17208
1999.68	13.8669	-22.7852	12.2833	-4.99258	22.0841	-25.8053	-5.28483	-0.834342	27.2655	-28.1062	-27.0683	-34.7833	-28.5651	-6.93528	-18.918	-2.10359	-2.74413	9.47703	25.9084	8.01812	-1.13882	-0.35403
2001.21	-19.9946	-73.9272	23.0747	-4.72851	-44.3393	-23.2832	-25.1071	40.4486	7.02445	-47.6554	15.5071	-45.4207	18.7858	-6.06731	13.7272	-10.807	32.5142	-9.00818	43.1895	-11.9537	-4.05049	-18.338

## Sheet: DataS9
Dataset S9 - Loadings for the LDA chemospace including untreated melanin-rich, experimentally matured and fossil samples; chemospace shown in Fig. 4A.
wavenumber	LD1	LD2	LD3	LD4	LD5	LD6	LD7	LD8	LD9	LD10	LD11	LD12	LD13	LD14	LD15	LD16
900.314	-3.9331	-6.36713	2.49389	-19.2047	-1.38197	30.6974	-2.97779	-14.0013	0.105347	-4.62191	-1.01488	-10.7867	-16.2897	18.644	-5.05677	2.30976
902.072	4.98985	0.27018	-0.167553	0.648959	-7.18616	14.0561	6.5534	-12.9847	-1.85691	-5.20909	2.48831	-3.85875	-6.10053	7.94186	-7.92721	6.80361
903.832	11.6582	-3.0003	-1.01712	10.0862	-9.41997	4.17937	1.95681	-16.5827	-1.70233	1.12827	4.29235	-1.75379	-4.96383	5.66084	-0.244504	2.02226
905.59	14.0091	-3.89596	-9.4189	1.32051	3.90883	7.00809	2.9512	-5.76957	2.49359	2.25616	0.540868	0.711412	-3.69537	13.3131	6.72558	-5.9073
907.35	11.0538	-2.45735	-8.51031	-5.10988	19.1342	17.2545	7.91986	-0.946046	5.69091	2.71791	-2.807	-2.39671	-4.76735	4.85252	7.75498	-4.47125
909.107	12.2563	-0.354737	0.29851	-10.5249	1.33935	5.30332	3.20166	-8.06559	13.0551	-0.0452284	-6.97553	4.8925	0.724348	-8.22471	4.65999	-5.30104
910.863	6.12374	6.80047	-1.96113	-9.30049	0.044512	-10.8207	-7.00933	-14.5479	6.15829	-5.94597	-2.58945	14.6218	13.2994	-19.684	-4.64492	-9.74577
912.621	2.86408	6.77301	7.77271	-10.473	16.9907	-30.7546	-9.93158	2.78804	8.97485	-14.3248	-16.5483	26.6164	8.79335	-32.799	-1.74797	-16.0699
914.377	4.89801	1.05957	16.7915	-12.2346	8.24596	-20.2478	0.340384	-6.56164	-2.54638	-1.24126	-8.46549	9.10629	12.1611	-28.5223	2.48247	-6.09589
916.135	3.37152	12.4414	15.3562	9.29153	2.32132	-19.3112	4.03909	-7.51003	-14.1798	0.532915	2.80983	-4.76769	-3.46057	-7.30337	-2.93039	5.60815
917.891	-0.099114	14.4193	6.13933	22.4762	-9.26186	5.95701	-3.18519	-6.91206	-0.698418	1.415	9.46359	-5.37098	-9.69578	-4.89424	6.82827	2.98603
919.645	0.389671	13.4194	10.6006	8.05146	1.5812	-0.118526	-8.9477	3.58259	4.74892	-2.89536	6.02019	4.2022	-8.71545	2.93767	10.7824	1.95453
921.4	5.17728	4.84224	-0.28332	4.2581	-0.868719	11.4106	-4.04527	14.5725	12.3939	3.36361	6.28487	12.4998	-1.3598	-0.797927	10.0455	9.55462
923.156	8.44914	-6.47754	11.0504	-7.80171	-11.5616	7.48024	7.20934	-8.55425	3.4123	17.1545	17.1691	5.82097	2.60947	6.0292	14.2405	8.75941
924.91	1.26064	-1.92653	2.2109	8.7384	-9.89514	9.63194	13.3219	-13.0478	-1.40716	-1.33449	13.8784	1.31086	3.5451	3.0625	1.07495	5.06578
926.664	-5.73025	-5.33846	1.69843	2.3841	-5.27138	-0.902309	2.21236	-4.07522	-4.97875	-12.9476	-4.77339	-3.2577	-14.7377	-1.09411	-6.85854	-8.57904
928.418	-16.4919	-3.12311	-1.30885	11.2398	20.0384	-2.42581	-5.07955	7.35974	-9.7162	-14.5213	-8.08846	-0.301805	-11.1513	-5.84321	-10.0969	-6.67576
930.17	-15.2287	-2.26593	-9.19075	8.32895	23.3464	7.28444	-3.54226	-13.3894	-12.9586	3.68043	1.11354	-12.8686	-10.6343	2.98919	-11.4217	-15.6491
931.924	-3.80391	-3.20248	0.876924	4.19587	11.0991	10.2124	-12.8107	-12.0061	5.90302	5.6036	-11.1804	-4.47126	0.644331	-18.8768	-8.37811	-12.5844
933.676	-0.870916	3.02795	13.5947	-5.64403	-0.448459	-16.1997	-19.8515	-16.3039	8.18874	2.06982	-14.7392	6.32324	18.0816	-20.6434	-24.9579	-10.697
935.428	2.2417	-3.14272	-3.04768	-14.8185	-3.14157	-11.2445	-1.02431	-11.1575	7.90803	2.48619	-11.3699	11.2399	15.3875	-8.06596	-25.8978	-9.90138
937.18	6.96799	-6.64204	0.587504	-19.7311	1.06815	-13.9566	13.324	-11.5777	-1.58686	10.1949	-9.28447	15.2018	19.7807	-7.30647	-15.5143	0.208817
938.932	3.58496	0.746833	-8.96939	-2.53621	-17.8504	3.91744	7.44189	-16.5893	-7.762	5.78991	-18.807	11.7357	7.31855	-15.4193	-10.612	17.2205
940.684	2.5886	11.31	-8.92403	1.78935	-9.28642	-12.9805	-3.54545	1.32246	-12.9787	-10.4552	-12.1678	13.0544	-9.33487	-11.3974	-13.2974	8.5722
942.434	-4.64624	15.3169	-22.9457	-1.75104	14.0691	-11.0566	-19.4499	26.3292	-12.4544	-12.9924	-7.07055	22.9434	-10.3172	5.23358	-0.443121	1.76173
944.184	-2.15414	1.6688	-14.4655	-10.046	6.79118	-2.31497	-15.3681	1.85139	-9.63276	-3.62097	-0.388331	2.71567	-7.19411	5.1856	5.19286	2.89471
945.934	-0.537691	-4.45526	3.30344	-19.113	11.8652	3.78565	-1.43632	-8.74024	3.00861	-7.56316	2.11655	3.80114	-3.27619	10.3856	9.66744	2.69805
947.684	-17.4125	4.7953	9.86962	-18.8888	-10.9166	4.31649	2.93019	-3.45668	-7.25658	1.45085	5.08958	-7.08957	1.81022	33.914	6.60465	9.61855
949.432	-5.28498	2.85759	0.500648	-10.2379	5.69234	-1.73974	5.58864	0.05385	-3.14714	0.457636	-2.61	-3.14001	2.78704	22.7738	6.10548	-2.54531
951.182	7.88656	9.30761	-0.575401	5.71709	-2.75645	-19.4595	7.10334	20.0727	-0.0175077	13.548	1.48487	-0.0338669	16.6919	1.90537	7.84142	5.76598
952.93	3.86178	15.5216	-15.2143	15.8888	-5.1285	-14.191	-7.20968	9.48705	-4.85059	14.6676	5.42661	-3.86462	7.89971	-8.40096	8.13695	7.5496
954.678	7.00503	6.66421	8.24173	0.666555	6.03107	-12.8167	1.57502	13.8552	-9.40563	2.45362	8.66318	5.65849	9.11017	-8.62911	15.9878	2.72654
956.426	-6.27908	4.27773	-7.14767	-5.18977	17.1753	13.6079	6.84403	20.9722	-7.70737	-2.43209	0.753768	-7.21121	3.86877	6.51874	12.3378	4.35576
958.172	-3.01558	-0.532324	3.14863	-10.5497	6.71988	8.26402	14.3432	9.84108	-3.18917	-2.76678	7.67889	-11.8836	4.05547	7.109	5.34098	-2.68377
959.92	-3.81891	0.46557	1.21998	-6.27463	1.47024	20.4992	26.6892	7.65479	4.53141	-14.5966	7.95541	-4.04765	1.6866	13.665	2.3284	-14.0079
961.666	-15.3178	1.78473	-6.45696	8.46546	-8.59396	7.26856	8.38713	2.67168	-0.478517	-5.72641	0.504886	4.72312	6.60198	19.0632	-1.30648	-12.6192
963.412	0.321001	-3.25465	-2.02423	16.4816	-8.36619	5.75714	5.69183	6.22527	2.56194	-2.69164	1.59482	1.83068	1.17708	0.415948	-0.219699	-2.47062
965.158	10.0473	1.70628	1.84024	18.2224	-12.3843	-1.77288	-5.36996	10.6035	5.33109	4.48145	2.02555	-1.91081	0.422157	-3.52304	-1.70047	6.30546
966.902	-1.41449	-4.77817	5.22066	2.58497	1.67232	2.33851	-3.7129	4.95868	8.98947	-1.66056	1.45805	-1.79024	-6.39139	-1.92635	-4.84695	5.73829
968.648	-3.95321	-13.2266	21.8416	-0.591175	5.27942	9.70672	2.36393	9.61097	3.8057	-8.89446	-11.9265	6.06824	-3.94066	-10.6367	0.182492	14.6004
970.393	-1.54123	-8.16035	3.51995	-1.31602	2.56091	18.0526	-0.202568	18.8015	3.48066	-5.55905	-6.59103	-8.6091	-9.01577	-7.69441	-6.9304	18.9508
972.137	-8.52378	1.00356	-0.419348	-8.90954	5.36751	11.1265	-1.20955	22.8637	3.51726	-6.37608	0.243349	-0.676876	-5.24202	10.5659	-8.15021	-3.44201
973.881	9.43197	9.84966	-22.8103	-1.30597	2.25173	-1.77063	-6.48307	21.6512	2.58357	5.98613	1.38404	-11.8132	-14.7342	8.36921	-8.61166	1.76212
975.625	12.2583	7.99279	-29.197	11.4848	1.08424	-1.56584	-12.4374	0.270245	9.68817	14.9327	5.26133	-5.1934	-2.72021	7.7969	-20.8247	-1.06747
977.367	12.1638	7.28199	-22.5722	6.84841	-9.02927	7.23096	-6.69986	10.0326	5.91886	13.4919	11.0411	-11.6918	-3.71355	7.0499	-7.38353	9.91202
979.111	6.18277	13.6046	-6.7678	6.32417	-0.282717	-9.28407	0.298448	16.7396	-0.159671	-1.49991	7.74607	-13.4857	-4.90459	12.9614	-8.12035	12.0927
980.854	-15.6151	-0.402827	4.79457	2.52517	9.00848	-2.95129	7.00595	9.3162	-3.88854	-10.7778	-2.04975	-9.29298	-12.4541	9.57418	-6.19511	2.53037
982.596	-15.5466	-4.01394	6.6478	15.5023	2.18718	-12.5172	8.54816	6.38087	-5.55163	-20.8187	-13.9004	0.80631	-7.1019	-2.90257	-7.61545	-12.3623
984.336	-5.21628	-8.43674	-0.754509	19.2524	-9.91136	-2.55735	8.48336	-1.77044	-5.72992	-3.29895	-11.5244	-4.39461	-5.66581	4.35065	-12.5309	-8.53249
986.078	-19.55	-2.85803	7.17338	11.0012	7.78222	-5.10532	18.9749	-1.43225	-8.10269	-0.0226934	-2.69657	3.26876	-6.15149	14.8031	-5.40601	-6.78346
987.818	-0.613689	-2.78311	6.80871	3.05611	0.755447	-12.1943	13.0137	-13.8419	-3.90301	10.712	-0.712557	-2.76991	-12.7998	1.36892	3.65934	10.6399
989.561	5.47463	-3.19207	-2.50136	-3.37702	-11.9215	-1.69967	-2.83384	-9.93951	3.69125	16.6841	-3.91941	0.68071	-5.10668	9.49104	-1.15025	5.39223
991.299	-10.1568	0.782478	7.48732	-10.3574	-8.03546	-4.5335	-14.4415	-5.18948	2.43066	7.03763	-4.52092	0.870851	-5.7454	8.0271	4.76133	1.93195
993.039	-15.9371	11.3081	7.21161	-19.9308	-10.6828	-2.98622	-6.84587	1.78533	-0.977933	-0.729615	6.96551	-11.9219	-13.3452	10.4364	7.8025	6.32708
994.779	-23.8911	5.14031	-1.94135	-15.2182	-10.8494	-3.37907	-17.0657	-3.52387	-15.654	10.8795	-2.50482	-12.5323	-6.6788	2.16958	18.9828	8.02632
996.518	-9.50351	5.38977	-8.44231	-2.02466	-18.6234	-16.8603	-18.417	2.01556	-14.3796	6.31231	-5.2779	-12.1845	1.97887	-2.89824	16.9414	-2.78479
998.258	4.57604	-1.45489	-18.8227	9.68634	-10.5083	-9.88884	2.98592	17.078	-13.3101	8.74589	6.55122	-2.88318	7.78224	-5.24739	10.3048	-6.23002
999.996	3.25504	-3.76632	-11.0624	2.83495	4.81819	-4.64675	15.9393	8.08667	1.13809	0.324537	1.01269	3.21708	20.3596	-8.86334	3.45673	-8.80214
1001.73	-2.84401	5.33881	-5.05422	-12.2322	3.68862	-8.58786	19.2643	9.50585	8.08897	-8.40326	-3.98179	11.0801	19.8456	-6.86134	7.10352	-0.8204
1003.47	7.15403	1.77949	-15.8165	-7.97647	-14.2279	-2.22524	0.0735441	13.8991	4.53573	0.170732	-6.8678	4.51207	17.578	-0.736723	6.51906	6.28737
1005.21	-14.0951	-2.14988	12.9278	-3.83911	-2.1321	15.6229	-1.99002	-6.57383	12.4931	-5.11667	-15.2608	-4.89168	7.1898	3.53186	1.16663	10.5266
1006.95	-4.61129	0.918019	3.28805	-1.51424	-3.9703	22.0373	3.4868	-5.35586	12.4939	-3.01803	1.94721	-14.9167	-2.85345	-4.98556	2.3635	12.7278
1008.68	7.55501	-2.27305	2.20795	-14.5015	0.74413	17.2167	1.00779	-6.40036	14.1031	17.6001	2.1934	-4.94946	7.40749	-1.66695	9.0712	11.101
1010.42	6.71262	-15.5759	8.58753	-6.98063	5.57896	9.6789	-3.80387	9.86703	8.76252	9.53931	6.51109	10.9618	7.35184	-9.18742	11.3939	-3.14537
1012.15	13.489	-26.9837	-0.403187	0.421605	11.6171	21.3664	16.4968	10.4434	7.27256	3.37106	9.25117	20.0021	2.17434	-7.36518	8.45638	-11.4433
1013.89	8.33868	-25.7436	-0.709058	-9.80147	4.62558	33.1416	3.28229	-7.91696	9.91008	10.8726	-5.82539	4.66395	-6.34292	-1.40772	9.90169	-12.0739
1015.62	-5.32449	-8.96757	-12.1887	-18.8003	1.23092	31.9019	7.2086	6.46684	5.3291	9.06665	6.41393	3.06343	-20.1709	12.1104	10.8031	-7.6295
1017.36	-6.61448	-9.29764	-15.8302	-2.40181	-12.6107	30.9069	-6.42085	-4.26665	-0.391125	9.14019	2.05237	-4.64549	-21.8398	6.53505	14.0384	-1.46947
1019.09	-10.0225	-4.10958	-0.0178981	-2.87008	5.32715	23.7076	-14.5675	-12.9397	11.3107	4.86196	-13.6816	-1.27498	-5.79315	-4.77617	16.6536	16.3908
1020.83	-4.02125	1.2509	-14.3014	2.12358	0.47891	8.60012	-19.9671	-0.348164	2.74778	-3.05079	-4.1747	6.22114	-5.48204	-14.0984	10.0591	0.145573
1022.56	-1.65658	8.06047	-14.2288	-18.9776	3.87356	3.55797	-11.8951	-4.09386	-2.00181	7.44382	-7.63616	5.11938	9.80486	11.5252	3.01838	-6.9667
1024.29	0.979258	2.22851	-5.22666	-16.6327	14.3222	-4.27721	-5.63314	-1.81564	-5.08479	6.47942	-0.177591	13.0689	14.7096	5.32034	8.72978	-6.41115
1026.03	4.00224	-7.52236	6.4405	-9.7933	21.0213	-10.1721	9.18714	-2.48282	-0.00562909	-1.77988	-2.0198	11.7911	13.3107	3.26488	-7.17553	0.265049
1027.76	0.767969	-13.8234	13.0757	-8.20936	14.1142	-17.3926	-1.85348	-4.3631	-7.83928	6.30848	-4.59777	5.85393	12.0081	7.61791	-2.4029	-5.35263
1029.49	0.839899	-11.8089	-3.03287	-3.73282	22.3848	-1.33147	18.5067	-18.2617	-14.4573	9.79591	3.37021	1.15033	8.52752	15.6419	-11.6473	-8.1395
1031.22	7.84946	-15.1431	2.85394	0.769666	17.167	-4.55829	12.6362	-35.503	-7.61137	25.756	3.89747	5.43693	14.2387	11.0419	-9.07363	-11.8141
1032.95	25.6505	-17.7562	2.31643	-23.8064	24.84	-18.2555	-7.01843	-8.46406	3.87112	21.1961	10.5343	20.3462	21.013	-12.3174	3.81994	-4.66573
1034.68	6.75691	-5.37573	-6.39255	-13.6354	-9.29244	2.61318	-2.82627	8.24506	-1.77209	1.55213	4.59333	17.2467	-1.46887	-6.30478	-3.94247	-21.1442
1036.41	5.49585	8.18283	-3.2345	-28.3119	-15.3357	10.0272	24.5561	-3.8792	0.226907	-10.2159	16.3049	-3.24409	-16.0368	13.424	7.5765	-18.1352
1038.14	9.33433	16.6985	-0.969936	-26.1261	-11.6684	15.7914	20.809	11.0997	16.2915	-16.9443	1.10838	-18.4677	-10.8867	6.82868	1.43726	3.1961
1039.88	-4.70397	7.52845	9.10788	-6.97528	-7.22831	12.2295	18.9866	20.4703	14.0624	-24.8244	7.13543	-19.7979	5.6534	-3.14735	-19.3891	8.64314
1041.6	1.23803	-0.905521	25.2996	-4.06491	5.38605	-1.19411	23.867	58.2908	12.9354	-24.4973	12.8508	9.17936	22.9407	-6.21894	-11.1725	-1.96369
1043.33	-3.13515	0.337189	-5.89084	10.1438	8.73374	13.0531	23.0127	-6.10831	-5.07113	-1.73912	-1.37486	2.3551	12.187	0.0925543	-14.9997	7.25092
1045.06	7.25126	-10.0698	13.9074	10.6875	10.1492	-12.941	9.78923	-11.6785	-4.83618	13.5767	16.855	7.46906	7.99264	-1.06235	-11.8989	16.6361
1046.79	7.9866	-7.95647	20.3907	-13.876	9.88581	-22.1256	-6.00219	0.346764	-6.34082	13.8582	11.5639	2.84327	1.12969	-10.7332	-1.94094	5.7751
1048.52	-8.8341	1.00493	24.3692	0.456218	-3.24318	-0.344762	-9.27244	-3.3447	5.09098	6.40633	1.05235	25.4381	-17.827	-23.2027	18.9169	-1.2696
1050.25	-0.277303	4.08544	25.7182	-3.43384	-6.67348	-2.85479	-1.64344	1.74362	21.931	-17.9144	-7.30128	12.572	-22.8673	-31.9089	11.8313	1.10761
1051.97	-6.46244	4.77961	6.60024	19.228	-22.6199	-18.531	-7.53552	-1.87995	-2.75234	-17.9558	-30.0612	6.2983	-12.0534	-17.7416	-23.7204	11.3824
1053.7	-5.05193	-19.4605	16.2728	23.7818	-21.7317	22.2364	-16.5536	14.7532	-12.4764	-5.09941	-4.45277	4.46749	-14.5158	-20.342	-13.6483	2.88846
1055.43	-14.4495	-14.4437	41.555	-5.97141	5.19589	14.8268	-17.1306	26.9691	2.64265	-9.76373	14.3554	13.2967	-9.72644	-10.6569	13.7283	4.4341
1057.15	-29.6696	8.92517	13.9972	10.8546	-11.1166	-18.2612	-21.9149	-5.20734	-33.2344	-13.3021	10.8235	-4.9163	-7.08964	12.9282	-7.6693	1.16662
1058.88	-11.1485	15.0284	2.45707	8.44228	6.36833	-31.5411	-15.2918	11.7956	-24.2954	-5.57075	24.3437	-11.481	0.376802	13.5794	-0.642537	12.7495
1060.6	-16.1795	19.2744	3.17981	16.8345	21.9491	-44.7887	-23.6946	-34.308	-19.4197	9.76087	-2.54205	-20.2938	5.27187	7.42288	-1.55253	-4.89348
1062.33	-13.7643	10.6592	-21.1481	35.9886	17.7435	-9.36371	-11.0838	-12.6909	11.9701	8.51519	8.16236	-10.2912	-21.3477	-6.66037	20.8053	11.5204
1064.05	24.4713	9.99434	0.164608	28.0435	5.57033	-26.2864	-3.58848	21.7586	21.0122	-12.0529	7.10728	-12.8725	3.99696	-21.2286	-7.73665	4.03354
1065.78	28.9649	4.02976	-14.3918	42.2546	-9.67673	-31.7901	-4.82286	-7.40854	10.2014	6.17045	13.2745	-2.65524	-1.05905	-32.3413	-11.3828	9.1949
1067.5	29.749	-13.1876	8.28934	12.0996	1.38465	-3.32753	-17.2201	0.877348	12.6243	18.0369	2.08111	-4.39696	6.1653	-20.1852	9.58317	-1.90978
1069.22	1.29244	2.32821	6.72833	13.8521	-7.33704	3.59184	-16.143	-8.93394	10.5281	2.364	15.7129	-30.6791	-12.2544	9.32952	8.22485	1.17234
1070.95	-21.6126	18.302	17.4594	40.9672	-13.9968	-3.14886	-18.4469	22.3521	1.11532	-8.01722	8.84099	-20.6641	-5.02268	13.4065	-8.28441	-21.3863
1072.67	-4.06361	5.93451	-6.35978	44.1134	-5.81207	14.9767	-15.4743	6.42429	8.35769	-0.923646	-2.12129	-13.0279	17.459	21.8309	-5.70135	-29.68
1074.39	-16.274	2.85161	15.2903	37.6178	5.33234	-28.5147	-15.8403	-25.3435	-0.191587	-11.1725	0.520459	-23.9263	13.0782	18.7508	-22.4095	-37.843
1076.12	-21.2419	14.1226	-28.6436	24.5493	-4.08499	13.2225	-7.10547	1.40531	20.7286	-12.6584	30.1642	-27.2373	7.97532	22.7202	-1.71629	-28.0878
1077.84	17.4976	1.45678	-27.6934	-25.8117	-26.6907	24.8056	-9.77879	15.2198	0.904383	6.00432	-3.16188	-26.1129	17.1733	5.302	-8.02511	-27.5135
1079.56	-5.28247	4.68399	-25.0572	-19.6693	-3.3429	28.2673	-5.8696	-21.5161	2.42163	6.16735	-32.52	0.894662	-3.50185	1.39509	5.52267	0.238153
1081.28	-6.08002	-13.1153	-0.753515	-28.4588	-22.7167	-17.1111	7.7487	-21.619	-41.2882	1.13099	-40.2936	-21.0265	-6.53683	20.8926	9.35236	-16.4979
1083	-18.8203	4.26883	-0.503817	-5.05717	-22.5903	-1.94421	5.02264	4.90124	-26.5324	-11.1907	-7.69567	13.1106	-18.0013	24.2881	-18.8064	-12.5155
1084.72	-19.9518	-2.15508	55.7246	-1.48286	-10.3035	-55.7683	-12.1238	15.363	-18.4837	28.5457	-22.926	34.8061	-10.6349	-3.3671	-2.79692	2.69521
1086.44	32.7684	-5.00318	8.92794	22.684	-17.7227	-3.19225	4.21072	-11.4822	26.9037	19.7712	0.631314	-1.69387	13.1431	-10.3845	13.738	9.14195
1088.16	30.3486	-13.847	38.3016	-1.18303	-26.2257	-14.0683	1.52463	-7.37732	7.27996	0.294952	16.6768	-26.5246	-7.14878	-24.8276	-2.66339	0.295754
1089.88	12.0274	-3.20114	16.4742	5.59825	-16.7867	18.2525	-13.9181	-13.4331	7.94821	-6.76505	18.4424	-24.3571	3.67657	-5.73217	17.3871	-11.8218
1091.6	19.5237	-8.53379	-1.16642	-21.5301	-8.58503	38.8797	-12.949	-0.0441528	-4.59798	6.0991	-16.0386	-4.8857	-6.71464	-4.86893	13.8014	9.49137
1093.32	1.59188	-15.8981	9.50363	-0.818895	18.3968	23.0061	5.77089	-27.7811	-3.88279	-6.83553	1.90168	17.6081	5.44461	-9.51294	9.89834	5.11984
1095.03	24.2784	-29.4729	3.31268	6.75532	-21.4687	-0.277333	-4.73993	-21.3091	-31.734	13.2492	0.772356	-17.2213	4.89782	-14.2871	17.5645	-8.15943
1096.75	6.46742	-14.732	-22.099	-1.78061	3.3639	-6.67867	-0.286671	-21.8085	-22.6603	0.202963	-6.37772	32.7791	-6.99271	-16.3023	-4.80187	-23.584
1098.47	4.36534	-0.475432	-22.8485	4.74959	-3.04094	-21.562	-18.0425	-9.13248	-1.26845	4.76092	-28.0461	10.4719	-35.9566	1.95079	3.85248	-8.8812
1100.19	11.0129	20.9293	-7.44032	-4.91577	-14.3415	17.4175	-13.9007	-10.048	32.522	12.7673	-22.6333	-1.51028	9.22598	19.0667	24.9754	4.13915
1101.9	-6.47668	-16.7449	20.1259	-31.2772	-48.0255	18.1657	-5.5658	-52.8828	17.1989	12.9301	3.55705	16.2832	19.7569	27.1601	-11.1371	-16.5507
1103.62	-39.9116	-2.36946	5.44152	14.4898	-21.4302	8.49788	-34.8548	2.94349	-1.42404	8.80019	9.26579	-4.21877	24.0932	-4.75381	1.7694	5.88042
1105.33	-21.0312	22.2931	13.0762	-11.9082	-21.4117	-7.81036	-24.6796	2.70772	5.24634	-10.5081	-18.2024	12.0182	6.54482	-19.8027	-18.8585	15.6528
1107.05	33.0667	18.8197	15.5445	0.0959044	10.2651	13.8048	22.5525	-3.15509	19.3807	11.0642	32.0725	-8.77506	33.2752	-28.8028	-34.0277	19.4467
1108.77	19.6912	22.329	4.3315	-19.311	9.57391	10.9789	-8.92717	22.9419	14.6076	19.291	11.0372	7.92745	12.0327	-2.71285	0.00553534	13.9759
1110.48	-20.7265	20.7251	-2.29505	0.715827	37.9915	-10.6594	6.88116	18.5377	-4.60383	-15.8291	-8.54166	19.6506	-14.1691	-14.9673	-5.3151	5.13357
1112.2	6.60433	15.0295	-0.0814315	-2.20392	17.7416	-19.9531	14.5486	5.97998	-4.41717	-7.21897	8.54388	9.15559	-28.1732	-8.73749	-0.710464	13.1434
1113.91	27.8255	-1.45662	27.6895	-31.2096	3.17319	-10.1415	8.34599	-7.00966	-8.46392	27.3198	-5.51239	3.37393	-8.92416	-20.2224	26.6051	28.6287
1115.62	31.2005	-18.8537	25.3868	-32.5242	3.67233	-24.8795	-5.4067	-13.6374	22.6603	9.31621	26.1562	21.19	15.5317	-12.0288	22.5999	9.38021
1117.34	26.4319	8.15045	-21.714	-6.72158	43.431	-40.0714	-16.3214	-19.3726	-1.48583	6.01607	11.9252	-9.56206	37.0435	-21.2125	-19.0032	-1.14778
1119.05	13.7446	22.5427	-7.00222	-4.11618	6.99248	-8.77766	-2.73024	-22.162	7.29191	-33.3036	-15.1308	6.4579	14.8042	-11.2122	-24.4989	-9.61259
1120.76	29.8067	35.513	-11.4543	-2.61137	-3.88761	20.6295	15.9643	20.2778	-1.74296	-21.1765	5.5862	-14.0573	-12.0653	0.281414	-13.5745	12.3707
1122.47	-13.0203	6.58161	12.4057	-18.9543	-19.4944	2.64748	-13.1545	25.4997	-11.9235	-27.9804	-44.619	-18.0093	-49.1415	6.60403	23.5671	7.97796
1124.19	-14.9111	5.808	7.59415	-14.8164	-4.92844	0.909786	8.2496	0.285741	-23.8663	-11.6902	-26.4853	-23.328	-14.4721	-20.1075	17.1901	29.8965
1125.9	-0.672868	-18.3748	-1.01442	-2.56886	-36.0591	8.93352	4.54217	-45.5174	-29.9089	13.1874	-2.03064	3.00593	13.9069	-23.8492	16.7376	14.7594
1127.61	2.63439	-30.2311	19.2387	-5.61726	1.52599	-10.7276	23.0342	2.72406	-30.168	-1.11822	38.3698	7.60952	-16.005	-32.7534	4.54652	-9.39675
1129.32	26.2217	-4.52483	41.6368	-15.0437	9.5111	-0.0663176	-14.4494	9.05591	11.0197	5.8465	15.9499	-9.50706	38.9323	-2.71856	3.84882	13.5996
1131.03	-0.341828	6.69301	19.6889	-23.0344	19.5481	7.32225	7.12314	-17.9455	4.42726	6.74537	-5.59769	-8.78361	30.7376	30.3453	-21.1394	-1.65419
1132.74	-5.4523	25.0883	42.1929	-16.2669	5.65094	0.806592	-1.69974	29.6808	8.4801	-6.19021	-25.9647	14.599	1.46718	6.06149	-2.95778	19.4868
1134.45	-12.0634	1.3838	27.977	0.597938	-8.84922	46.4231	-9.10868	25.5761	11.9095	7.06466	-10.3649	-7.49759	-36.2937	-15.109	3.88017	21.711
1136.16	-23.9299	-6.54532	13.9532	0.166615	-4.58885	30.615	-10.2975	29.0934	1.21331	-23.8559	-11.3933	-1.01335	-35.4724	-32.3328	22.6218	1.28208
1137.87	14.2104	12.9946	-21.3977	4.42465	-4.45862	46.8029	15.5841	-1.37188	19.6613	-7.58188	10.1976	-8.0959	20.0414	-0.571325	0.135948	7.86096
1139.58	18.6345	-16.0437	-16.4393	10.0444	-38.5861	64.6528	17.1181	-13.7209	-3.32534	10.3459	-13.2717	-2.30681	48.1551	18.3568	-7.66294	-6.56143
1141.28	12.4672	-19.2309	2.34902	0.625905	17.3418	0.172077	28.241	20.7525	-11.5165	-18.7835	4.08381	-1.13268	30.5971	21.4574	-31.9725	-28.6182
1142.99	14.1793	5.15819	17.2778	9.47616	-7.21927	4.35568	3.63577	22.3751	-0.300698	-4.244	9.76542	-31.0476	36.6009	27.2822	-20.8967	7.0513
1144.7	6.26265	4.99482	-28.3642	30.075	-23.4753	11.1005	1.92814	6.48039	12.3502	-22.812	19.3481	-10.5651	3.2956	27.5521	-12.7639	-1.9093
1146.41	-7.13114	31.626	-35.3352	43.667	-3.35476	-17.3921	-15.9546	7.93486	0.656296	-19.4891	-14.2711	-0.950691	-1.40013	-4.90643	-16.5266	-0.483165
1148.11	-13.7436	-10.3553	-14.7041	15.6513	5.52059	13.0992	20.0766	7.20945	-4.48649	-12.3328	2.37805	-15.1435	-25.6471	11.2497	-15.4223	-14.8007
1149.82	-6.10935	-0.880728	-29.0608	23.4523	18.2532	-9.09896	-2.9088	26.7498	2.93333	-18.3691	3.58983	4.82683	-15.7307	-4.88865	-14.1516	-26.7634
1151.53	10.7188	1.09303	-1.6709	2.34908	26.2956	12.2776	14.8545	-5.73797	13.7915	-5.92469	-3.7239	18.6732	7.78773	2.25028	-13.9688	-7.96646
1153.23	-6.29008	-31.8765	5.46846	5.5921	-26.1554	45.7473	13.613	-16.8358	-9.06006	16.8937	-0.926631	8.00198	0.8906	-6.9429	16.75	14.1563
1154.94	-4.14077	-3.85979	-21.059	-6.60526	7.71695	26.5852	-4.35398	-17.4582	-5.25185	10.3451	-10.7269	-0.173229	18.1354	4.0842	-4.54096	7.20587
1156.64	-21.6811	-1.66192	-20.0821	5.43336	8.62631	25.9389	13.7529	-6.05508	-3.4773	-13.3036	3.52953	2.15268	20.0713	-2.95522	-9.31615	-7.37218
1158.35	-1.17234	-11.489	-85.5263	47.8615	-35.3973	29.349	4.16184	-5.5184	-10.0979	2.71089	42.6258	-8.26945	-35.9943	7.08615	4.96218	-4.92347
1160.05	-33.301	6.42004	-33.4403	16.4671	-5.59237	6.87655	-14.3222	-21.5232	4.81233	-7.49971	-18.5471	0.460624	-39.8913	19.3795	15.193	-5.16253
1161.75	-32.1986	-4.77535	50.5732	-25.8931	0.368501	-7.58695	-8.2818	3.54379	7.979	12.9107	-11.0015	9.71588	-37.9095	30.3164	26.9442	3.69705
1163.46	-0.0727471	-7.38873	3.12732	21.4137	9.01241	-37.4829	-33.2811	-6.05644	13.2275	9.69958	-13.1745	3.31153	-2.52586	2.33142	-16.2833	-8.86588
1165.16	-16.0864	-1.49706	-2.73104	-2.0032	12.0118	4.66254	-12.6683	-14.786	17.5445	-3.40903	-21.9715	5.22057	0.301822	13.8025	-24.1567	6.46488
1166.86	-19.3015	-17.4804	-16.2584	28.5059	-12.2695	-12.6039	4.2968	1.61828	24.4593	1.31955	9.32348	31.2976	-15.8067	-16.8289	6.11186	18.7429
1168.57	24.0975	26.2906	-35.3387	24.7574	4.915	-13.9474	18.2914	2.37853	10.9922	-2.25912	2.57534	4.70248	20.5578	5.70533	-15.8132	18.0959
1170.27	16.7184	17.0097	-61.256	2.14246	8.98413	-37.7544	35.3664	2.6745	19.5599	-19.0165	18.5619	25.4205	41.019	-4.80233	-4.5542	-23.2802
1171.97	6.47551	-7.03117	-34.4598	-2.02954	-4.58321	-21.8613	1.59607	-3.25964	0.193322	1.60181	21.6055	-8.13547	28.554	12.6312	10.1632	-10.8471
1173.67	-3.02195	5.37953	9.27901	17.0216	10.341	9.61789	-3.19473	6.17578	19.4602	5.65098	-15.0254	-9.79625	-3.53325	15.9404	-0.225044	15.2874
1175.37	-15.1144	5.51498	11.8468	38.7496	-30.6284	-0.283631	1.41595	23.8646	-0.617922	37.512	-10.2538	-11.2396	-7.05156	0.23353	-2.02435	19.0358
1177.07	-2.94321	16.5589	-41.1771	27.2971	-44.2285	14.2971	-5.44433	-20.7884	-11.2925	36.7227	-3.13449	-42.6103	7.47762	2.21196	-10.9542	9.05647
1178.77	3.66394	10.762	-22.4652	6.72304	-9.7876	32.55	-1.63888	-15.9647	6.11583	41.9055	-3.22305	-32.7875	23.8223	2.88986	-16.2726	28.6724
1180.47	13.6776	-5.53953	-3.44645	-9.66853	-0.892333	-27.0393	8.71935	3.08656	19.3238	42.9448	20.2062	12.5811	4.08875	-33.4225	11.6897	22.5024
1182.17	28.8161	-14.9332	-0.756724	5.28952	9.63969	-28.5329	10.5987	-9.42239	-3.9101	-10.3876	-6.01968	20.2053	-1.05412	-19.0389	-0.406657	1.77138
1183.87	14.9617	-17.2102	-25.7191	-16.1351	29.3188	-44.5018	31.6381	0.528844	-16.732	-34.7395	8.48237	20.218	-19.8021	-5.23893	14.0247	-27.3452
1185.57	8.76405	-13.2654	11.5975	-9.9107	26.4932	-26.0279	-2.63769	-11.1939	-15.5744	-26.2067	2.28615	-26.9528	-8.62693	6.94945	15.5924	-34.135
1187.27	3.80839	-11.5796	23.5395	2.74841	29.1917	-0.974599	0.857015	4.71132	-11.0637	4.42175	13.5597	-11.8829	-17.6583	2.45536	11.7179	4.18296
1188.97	-16.6188	-6.59166	1.20574	3.22475	8.62673	-34.2796	7.39369	-14.3708	-10.9972	-6.52297	19.4857	18.5608	5.33548	-15.2391	-13.8126	-26.375
1190.66	-14.7417	21.7225	-36.4441	3.9505	-7.47137	6.57816	-8.90114	21.1864	6.96025	6.79438	60.6612	4.12955	-7.28087	13.6601	-10.433	-11.609
1192.36	35.4349	-9.32791	-2.85585	6.24696	1.57945	-5.04032	-0.233337	14.0806	-31.144	45.4363	29.0606	-17.3716	-15.4852	25.5703	-21.3419	4.52154
1194.06	9.55082	-31.3447	15.4359	-13.4641	-21.6646	-7.73936	-0.933636	-3.12635	-24.4839	28.2669	-13.4757	-12.1646	-17.9454	14.46	-13.3992	0.861193
1195.76	27.3519	-14.4653	17.128	-2.91703	13.605	-23.1003	5.59562	6.77588	-15.33	0.667995	-23.0978	21.5504	3.26404	-26.7881	-23.8354	12.8061
1197.45	-1.48203	3.64014	10.3554	-30.1889	5.14431	-2.94274	18.7797	17.2513	-28.375	-15.2003	-23.4716	24.6493	2.03401	-9.01635	11.0468	3.54063
1199.15	18.5842	-5.40923	22.5061	-31.2122	-0.906084	-10.9765	23.0987	-4.81626	-14.1364	-5.54078	9.89141	-28.9748	7.55601	8.81308	10.12	-25.6584
1200.84	14.6245	1.81252	1.18286	-12.4079	-26.5678	-2.87135	10.4482	18.4358	-12.546	17.0127	19.3143	-6.28177	10.4212	29.2387	21.8167	16.7164
1202.54	-2.26586	13.2484	-25.7876	-4.02299	-16.498	18.6532	-5.62287	7.52962	-0.685621	-3.99338	-11.9194	3.0499	7.30605	15.4635	6.365	-11.1506
1204.23	-0.624895	25.822	-46.6658	4.34418	-2.46799	24.4171	-13.2672	42.768	15.5406	-3.19609	24.849	0.0370594	-11.6798	12.6659	13.9567	-6.52094
1205.93	-0.169343	0.641569	-17.3715	-2.59209	0.238449	-1.14234	-13.2692	8.45367	-18.7663	13.6474	18.0405	7.76145	-15.3087	17.7497	6.28304	-15.4688
1207.62	-31.0791	-3.14348	8.90852	-14.7273	-15.963	7.44442	-6.95017	-24.7381	-5.14794	-4.75205	-28.7523	-16.1637	7.0173	17.5848	5.95851	1.8908
1209.32	-1.60337	22.4326	12.3906	-20.4789	34.7539	-11.9807	-4.91525	31.9466	2.68781	3.74837	-4.24325	18.2568	5.31126	-8.80771	12.2859	8.91386
1211.01	1.37249	-3.45182	25.835	-36.3215	5.70153	-17.8707	-9.88544	-5.13947	-10.56	5.99512	-4.15993	23.9491	19.1491	-7.17454	16.2605	-9.41692
1212.7	5.19129	-6.97327	17.4579	-24.7663	7.25831	-13.122	0.645077	-0.125603	-3.16042	-8.98909	9.51994	-2.42776	12.4309	-1.45252	12.3503	-1.83289
1214.39	-4.06944	-1.52212	33.5466	-19.0323	-20.1105	-0.451155	0.274589	17.7466	-10.8038	1.72092	2.01241	11.5704	8.30935	7.35084	22.9105	16.6824
1216.09	-2.97342	-4.00599	34.4546	-23.6032	-17.9788	2.92909	-8.05582	-18.8538	-16.8777	-0.991149	-17.0081	-3.65863	5.05108	6.11142	22.4144	4.86583
1217.78	-1.79771	-5.6802	26.3723	-6.84429	-4.74462	-0.85717	10.414	-23.7521	-7.66217	7.4516	19.0138	-13.3928	-2.99618	-2.84432	10.2836	9.81525
1219.47	-24.6326	-3.89255	21.0549	-19.4253	7.34177	8.25944	26.8299	-20.0529	-0.194286	-16.2227	17.1491	-2.43541	11.417	8.23278	3.94956	-3.24228
1221.16	-14.9903	0.223759	4.40533	-11.3441	8.49785	22.7107	16.4872	-3.73842	1.18488	-14.8296	-2.93508	-24.0188	3.47149	1.62384	8.09354	2.25046
1222.85	-19.1596	3.94627	-21.2282	14.5778	12.2487	20.8029	10.2984	36.0627	2.92977	-4.91462	23.6131	-5.21667	-16.3342	6.19899	5.58848	-15.5117
1224.54	-3.72968	0.181443	8.31699	-7.90123	-2.03455	-6.1694	-5.90021	5.8978	11.2524	11.8807	15.4445	-3.01757	-7.95647	14.768	1.06866	-12.9354
1226.23	-6.00936	-3.56259	-0.70209	9.25056	1.30447	-8.01375	4.25187	14.6973	0.85131	6.1293	27.2033	-1.75023	-14.5374	19.4576	-12.8294	-17.759
1227.92	-17.9979	-23.27	28.221	2.4431	6.90536	-2.60984	6.65283	4.72251	-7.26232	5.86091	-1.61674	23.4377	-3.95174	15.3487	-7.09586	-14.3008
1229.61	-4.00852	-21.3551	18.6729	-3.10804	0.386333	-16.1775	-12.8258	-7.22629	8.2408	3.16376	-3.34086	42.4957	24.01	-2.4671	-6.31435	-17.9675
1231.3	-13.6743	-25.5909	0.508718	-16.8561	11.5138	3.98516	-11.4078	-7.26103	-0.4332	7.97294	5.45185	28.5382	9.41402	-8.70633	-1.09856	-0.108351
1232.99	17.6751	-22.2167	-17.8388	-18.9074	7.92297	-1.83368	-5.97612	-11.7553	-11.812	5.04327	-8.74009	16.3322	8.76507	-20.6334	-9.64289	1.04801
1234.68	20.4058	-10.6012	-33.1804	1.33489	9.5834	8.78937	-16.6362	-2.08034	-7.3501	1.51589	-12.7508	2.1543	1.8618	-30.671	-6.83559	1.44655
1236.37	0.924745	2.95071	-49.3198	-0.306119	8.08098	25.5768	-4.88945	-3.61415	2.45228	-13.7963	-4.87617	-10.1859	-23.1671	-22.0208	-3.83593	-0.385394
1238.06	1.55482	16.9608	-16.6633	-23.3276	32.332	-0.268322	-15.4776	5.42852	14.1268	-18.6748	-23.9469	1.86666	-21.9481	-14.2157	-0.150469	0.74833
1239.74	25.8943	18.2625	-7.26976	-6.29651	27.3657	-32.5547	-12.9505	14.6395	-11.9014	-7.23404	-13.2799	-13.2885	-20.5867	-12.7692	-10.602	-20.3895
1241.43	3.88555	13.2987	-5.69601	20.7073	-9.1626	-5.76427	-5.03197	2.53038	-6.69745	-21.6055	-18.9075	-12.2971	-29.8488	0.292899	-0.34388	-13.6314
1243.12	10.8692	-5.88166	2.87333	8.28063	-42.0849	10.4276	-11.8753	-1.90633	5.77964	-0.966133	-5.5822	3.50167	-16.9208	-16.0482	15.5782	-12.3096
1244.8	-14.4721	-7.60083	16.1117	-0.819265	-3.53854	10.0065	-11.828	-2.25921	5.54534	6.90485	3.05885	10.5096	-9.58795	-13.9559	8.42295	-8.74451
1246.49	17.3626	-4.10839	12.2011	21.8866	-7.56442	3.12648	-15.9926	-15.89	14.5414	16.491	2.18126	2.37512	7.9577	-24.4928	-7.36942	-0.82193
1248.18	-13.767	7.90866	19.5759	6.05913	1.93112	6.23159	-23.1768	-16.5963	22.3323	3.89234	9.40888	-10.6666	7.72595	-14.3709	2.31271	-2.49017
1249.86	-31.5349	14.7224	-10.14	-8.42556	12.3646	26.5056	-15.2559	-3.82749	41.3876	-5.08094	12.1838	-1.34479	-21.0326	-5.72318	-1.68154	-10.0244
1251.54	-20.7238	28.1395	14.2445	-18.3915	30.7691	-8.11107	-24.7865	13.7164	37.421	3.98756	-2.97712	10.997	-10.2044	6.60596	-1.38638	15.2393
1253.23	-0.48857	19.6251	19.0635	-10.3744	4.65864	-29.2329	-26.6844	-7.28644	4.16079	14.1671	-18.5793	-9.94374	-8.77179	2.29357	-6.41395	14.6542
1254.91	-1.33823	9.30103	8.92863	2.54293	-5.98357	-8.86061	-5.90674	-4.87134	-4.82725	12.6716	-7.01614	-7.80038	-8.3142	23.6254	-0.211991	23.3668
1256.6	-4.36708	0.840921	15.4188	9.0917	-0.460244	-3.04039	-1.7892	-8.47552	8.77729	11.2607	0.354987	-5.53754	6.5803	9.22077	5.82619	27.3144
1258.28	-12.702	5.9936	23.264	16.162	29.7802	-5.01234	-1.3769	6.39769	8.90503	1.5308	0.754605	2.37161	2.16533	3.76248	5.45286	11.7049
1259.96	-9.6517	-0.0682573	15.14	15.3602	21.5625	21.5866	-0.653866	-2.61059	14.1478	-12.1095	-10.5801	6.9826	-1.19759	-6.39236	3.03669	7.13365
1261.65	-18.0859	1.09606	3.25088	5.80394	15.5498	13.1101	0.97023	-10.6018	5.08551	-26.2772	-14.5623	1.81488	-2.98722	-20.5554	-13.2353	-11.5567
1263.33	-11.5121	-8.74592	-14.0361	-5.26661	-7.45367	13.5865	1.70434	2.10781	16.2043	-13.8224	-19.0435	19.8626	-11.2217	-16.8491	-5.10179	-27.1719
1265.01	11.4526	-7.89418	-7.41802	0.341332	-12.6674	5.25331	3.22515	10.0716	13.3601	4.90689	-13.1114	13.4743	-4.86881	-15.3751	1.46444	0.851142
1266.69	4.82335	-14.4817	-4.19347	-3.76533	-23.6034	9.48452	-0.206338	-5.88147	3.87596	11.2472	-13.8983	3.67052	-8.25109	-1.63234	16.7153	-0.21495
1268.38	8.96617	-9.36904	0.258566	-5.90379	-14.3317	12.4337	5.75729	10.8083	-1.55518	14.4808	-9.10102	-7.82047	12.6477	24.3832	14.1679	4.78089
1270.05	-3.74476	-7.47712	0.777407	10.4277	-7.99276	5.5549	7.38348	7.59582	11.1363	1.77036	13.6329	-18.8245	18.9317	25.3998	7.3717	-0.478512
1271.74	6.01532	-8.86313	11.8378	12.1815	1.14569	5.96235	-7.01146	0.636171	4.55536	2.92344	9.50792	-10.1907	11.7598	11.2375	15.229	2.84026
1273.42	-8.9735	-9.0921	35.3479	4.82839	-6.20958	0.268709	-6.8395	-4.80217	3.3806	-3.38159	-0.883892	2.0674	13.9343	0.203673	0.698254	4.54158
1275.1	-14.4794	9.35479	31.7274	5.26129	-8.79142	-7.78497	9.21299	-23.0771	-8.35701	-16.6229	-23.712	-11.6846	12.9362	-3.25543	-17.8286	9.09843
1276.78	-3.76516	13.2033	11.5845	0.783008	-29.3445	-16.5721	-1.14094	-16.412	-3.40454	0.239888	-26.3942	-9.44283	7.9923	2.81714	-13.1405	12.9702
1278.46	3.10285	18.4365	-13.9621	3.35727	-19.0699	-12.659	-0.142619	10.4998	-1.68054	-4.40625	-4.61842	-3.88784	0.715354	-3.002	-13.9166	13.0126
1280.13	-4.46974	9.569	-9.01839	-1.79749	-10.3511	-1.39616	8.96553	9.60962	-4.95204	-8.46666	-6.5035	-5.04928	-0.429262	-1.03129	-4.80572	10.96
1281.81	-7.92182	6.2483	-5.28157	2.66353	-3.06446	-0.0359234	11.1651	12.9909	-7.61495	-9.75947	3.59685	-5.16088	1.15262	-2.40902	-2.35765	9.64441
1283.49	-6.068	-5.22533	4.69046	14.2928	-9.39231	3.96814	11.7848	-4.70266	-12.8817	-7.63375	17.1375	-11.0034	-1.604	-5.4693	1.23943	1.24171
1285.17	7.01051	-12.642	4.71847	18.022	-3.837	3.00545	14.198	-12.3974	-10.0533	-5.16375	14.9482	5.10555	3.67971	-19.6392	0.894145	3.59405
1286.85	-1.10327	-14.8068	7.55015	11.1431	-6.49095	-3.33234	17.0472	-0.745407	-17.807	-4.67793	7.55893	6.77753	2.2161	-9.81161	-5.79093	3.52045
1288.52	-9.87935	-11.4538	-5.4125	2.13158	-9.67892	13.7961	16.0405	-4.27646	-16.3496	6.39933	-9.52644	2.31191	3.82059	1.9707	-3.53409	2.95318
1290.2	-3.01207	-8.73405	-9.65721	12.47	-8.6971	17.1393	10.6894	-7.92762	-4.36769	10.1982	-8.83998	2.54244	6.41994	6.18257	-8.46458	-0.690003
1291.88	-11.4094	-5.1772	-14.3568	4.66505	0.397504	12.5341	7.23293	8.4434	-4.88918	0.654441	2.337	8.08511	6.01586	9.86821	-8.52898	-6.74516
1293.55	-12.0172	-7.64014	10.6876	-5.30753	13.0909	7.85456	10.9755	10.3128	-4.63024	3.73146	-1.05649	7.17341	6.76479	1.8381	-5.43269	1.18258
1295.23	-4.03537	-3.40674	16.8864	-4.1641	11.0129	-8.07814	7.80584	3.45071	-6.62215	3.24225	5.7706	9.87428	-0.349165	-1.93419	0.741363	-3.08144
1296.9	1.45894	0.705069	14.7933	-4.19616	2.49606	-1.19901	4.50265	1.84968	-4.97121	1.74531	13.4153	2.55851	-6.10812	-5.34904	11.7024	2.91972
1298.58	-2.78409	8.90091	7.4557	-13.1019	9.73468	-12.9718	2.9865	0.792701	-0.668929	-6.31419	9.03691	9.16347	-2.61741	-3.55598	4.4516	1.1579
1300.25	0.931611	6.73084	-1.83895	-21.6175	14.1095	-12.764	4.21637	2.05297	0.864649	-5.83231	6.34129	0.552344	-1.2017	6.60333	-2.5862	1.24611
1301.93	1.05974	2.43266	-5.87597	-22.7274	6.20179	3.64178	0.570077	0.188705	4.84584	0.270447	5.7313	-7.86452	-1.34368	13.9191	-0.861071	-4.32695
1303.6	2.55108	1.87781	-3.55006	-10.5518	10.2671	8.00055	7.82726	-0.428656	9.60219	-4.30744	7.55242	-4.74005	2.46821	11.7191	-5.09748	-4.09512
1305.27	-7.44916	1.28709	-4.33739	1.67454	1.70071	4.19025	0.37507	-6.95516	7.4574	-3.61278	4.79493	-7.96152	3.82753	7.31638	-9.8162	-1.13719
1306.95	0.128238	6.90595	10.0699	-2.71139	7.21674	4.35087	-1.7596	-1.24638	8.82117	-1.77869	-0.130442	-5.71995	3.17364	-5.51877	-4.28275	9.78994
1308.62	9.73768	5.5421	3.21619	0.277343	4.94859	3.57752	-3.37431	5.82276	14.3078	-0.219687	5.66879	0.634636	-0.414422	-6.50687	1.21387	-0.897494
1310.29	3.09773	7.78755	-3.83926	4.79892	-1.79866	8.72626	-3.75954	10.3614	16.6511	-2.26427	16.885	0.294535	-6.93054	-6.81585	5.67079	1.67348
1311.96	-4.56463	6.28542	3.5945	-2.50055	-0.675617	-5.21364	-11.3264	13.136	9.37684	-2.91227	11.3669	6.91069	-0.541172	-0.31435	6.58947	-3.65234
1313.64	-4.72422	-0.728849	12.2066	-9.7247	-4.12621	-15.4126	-14.408	7.39662	-2.49643	3.87488	-0.0540656	0.259167	1.68132	-1.2857	5.20863	-2.60572
1315.31	-3.55607	1.74025	3.91209	-8.36358	-10.9259	-11.4089	-13.6417	5.86915	-7.47766	6.82794	2.63297	-2.61215	4.09622	2.20352	9.68238	-3.98921
1316.98	-7.97073	1.46496	5.24022	-7.53555	1.65056	-15.5886	-13.4026	1.64102	-8.3299	4.55035	-5.30518	4.988	10.3612	6.48814	1.70765	-6.61819
1318.65	-6.36313	1.94572	4.34991	-2.95619	-2.97335	-14.7915	-11.9786	-3.15441	-8.61731	0.366229	-12.0139	1.38864	10.9488	4.22305	-3.10942	-4.25565
1320.32	-0.0750425	4.86867	2.54376	-2.83165	2.12947	-11.8433	-12.0602	7.5115	0.960439	-3.5832	-13.0474	5.67849	2.67255	-5.55098	-0.634388	-3.65693
1321.99	5.05126	1.27803	-9.65013	1.12088	2.80879	-2.37767	-6.30827	12.6523	13.1841	-2.21127	-4.22398	7.24966	1.02239	-9.16382	-0.16353	-4.47659
1323.66	5.63543	3.28752	-17.4225	-3.83792	-4.92489	-6.7888	-6.1857	12.3109	9.67812	0.196551	-3.89581	5.327	3.17552	-2.47931	-3.88173	-3.67854
1325.33	6.83874	-0.120783	-12.0331	-6.7716	-8.09046	-3.00382	-9.8362	5.50591	-0.293086	-0.208324	-8.18204	2.82427	-2.20663	3.38766	1.06516	-4.05031
1327	7.28475	0.42708	-4.98624	-1.12163	-7.61358	-5.38494	-10.6224	1.36783	-7.02154	0.685753	-10.7537	2.26815	-7.25402	-5.56151	3.18499	1.88218
1328.67	7.31088	0.855446	-7.17036	5.71602	-7.18948	1.26379	-3.30058	1.56685	-6.89303	3.9212	0.551934	7.50117	-3.48153	-5.48834	6.19849	2.72152
1330.33	1.31825	5.40498	-2.53581	7.59413	6.52553	-0.172553	-2.15776	-4.00132	-16.2865	4.55855	-0.716987	8.60058	-0.23068	7.63149	-3.21491	-3.53799
1332	4.47044	5.87099	1.57909	9.94366	4.06094	4.40474	2.78757	-3.91376	-17.3734	2.90989	-1.88929	4.99042	2.14757	6.79362	-3.81902	0.715444
1333.67	3.41232	6.56892	-0.202819	15.3964	8.44314	-0.0104547	3.47366	-7.00656	-10.4566	-0.489253	1.50671	2.10019	-0.563014	0.705568	-11.9129	-2.58175
1335.34	3.3401	3.0044	-6.76832	18.0649	9.44409	0.0815586	4.09406	-9.23776	-3.27847	-1.41937	5.56999	-6.32466	0.324992	-2.31932	-12.5265	4.74188
1337	6.79426	-0.929858	-12.5056	1.8643	11.1788	3.60667	1.11784	-13.6282	0.292984	0.755928	-5.92999	-11.1819	-3.11354	4.99742	-7.92386	2.8091
1338.67	8.91126	-3.68288	-10.591	4.65195	10.5324	6.11539	1.28763	-18.2255	-0.933282	-2.21173	-0.0172903	-13.2926	-9.81478	8.746	-2.19449	5.16923
1340.34	6.87469	-7.157	-4.50972	5.14117	8.11525	7.52093	3.49668	-10.3268	0.891086	-1.97719	-3.25283	-12.5291	-9.87071	-2.05388	2.39128	15.0025
1342	1.9363	-8.28203	-7.44103	0.7626	6.91521	11.2056	7.22987	-2.94229	3.08316	-1.13282	-0.353505	-6.8598	-5.16058	0.478857	5.74918	5.81809
1343.67	-1.36054	-5.53588	-8.63259	4.14664	5.09344	11.667	11.4922	-7.71985	0.315145	2.87079	-0.45544	-3.03335	2.15171	4.36515	-1.90219	-2.0087
1345.33	-2.15638	-6.76118	6.37588	-0.0760653	2.13043	6.78057	9.87608	-1.47235	-5.58688	4.66294	-9.40085	-3.73804	2.92888	4.22718	-1.4502	4.70845
1347	-0.588514	-3.80468	12.5209	-9.0587	-0.48067	5.53862	5.91665	-9.16219	-3.81221	-0.129109	-13.8666	-5.80289	5.15289	10.5667	-2.47868	-2.54869
1348.66	3.08078	-5.10483	1.30923	-3.26043	-2.49953	10.2039	-0.553967	-5.70867	1.62455	-0.552359	-4.91613	-4.76084	1.66725	7.58808	0.172645	-3.40423
1350.33	13.1907	-3.00285	-10.8803	-8.91087	0.107488	12.2616	2.69932	-0.980809	8.3122	-0.501555	-0.364915	1.13764	-3.59966	12.7665	5.16908	-9.38283
1351.99	11.0802	0.280879	-4.64847	-9.34081	-3.07186	3.69112	2.90512	13.9544	6.56345	-0.226264	10.7817	10.1273	1.09549	14.4171	6.3599	-4.38206
1353.65	5.65736	2.87297	3.82575	-14.3401	-9.77371	2.01854	-4.29785	21.2831	3.51569	6.0582	6.78279	6.17838	3.0704	-0.176582	13.6722	3.15958
1355.32	0.0953589	8.46253	-4.62524	-3.79324	-3.89766	0.375914	-6.6569	14.4916	8.03258	0.593509	11.2311	2.28666	4.30506	2.65151	13.5628	-1.05634
1356.98	-6.66375	11.57	4.63127	9.36872	-2.73293	-9.62519	-2.70142	-4.26253	5.82579	0.906204	12.403	0.913381	6.81314	0.431512	2.32659	-0.710667
1358.64	-7.53907	6.85937	12.7791	14.3303	-0.442846	-13.3521	-1.30247	0.873175	-1.68166	-3.55098	4.18878	-8.25591	-2.79749	-0.442491	-1.75688	5.91304
1360.3	-0.583655	2.64342	14.6103	11.0011	-4.88992	-3.3595	2.01844	-11.2869	-2.79529	-11.0552	6.05123	-14.8482	-8.876	2.81846	-0.620787	0.153804
1361.96	0.761285	-6.08019	0.929151	18.9638	-1.60585	10.4203	6.82371	-15.7654	5.59165	-12.6702	9.42423	-10.0908	-7.69814	-3.7389	-7.26591	-0.0916153
1363.63	5.58367	-6.49159	-3.85279	12.7495	4.41943	4.02759	17.3627	-7.08861	8.37009	-10.2307	14.6672	0.213708	1.80071	-6.05195	-11.2544	-4.18145
1365.29	-0.602014	-12.7227	-0.81605	1.50486	4.32285	6.53843	16.8704	5.0902	10.4279	-7.98841	11.9482	11.6318	1.98301	-9.31626	-12.6502	-9.61598
1366.95	3.8555	-7.80293	8.48749	-10.9893	1.93317	11.7687	9.65314	21.2624	11.4096	0.906723	3.95796	7.23689	-2.76792	-15.8804	-4.75509	1.15892
1368.61	2.57415	-1.00667	9.56489	0.122958	1.38056	1.63093	2.67318	14.2448	9.38945	-1.80572	3.06202	3.77138	-0.435967	-6.63245	-7.50854	5.97854
1370.27	2.78114	8.33465	21.41	-10.4281	4.67706	-12.0267	-3.62347	7.92447	5.63516	4.23031	-4.81575	1.74619	4.86241	-6.17687	-2.18151	11.7292
1371.93	2.60199	7.49153	17.4359	-13.5879	2.03792	-9.12668	-2.25548	13.0667	1.73117	7.60155	-6.86354	-0.879124	-0.583783	-4.5503	1.87971	10.5723
1373.59	2.12196	9.50578	18.6584	-20.5562	-3.70556	-4.9614	-3.56315	1.29122	-6.88582	6.4416	-4.78716	-6.25405	-1.97366	5.71437	8.45315	6.30424
1375.25	-2.95673	3.05219	13.5631	-5.33809	-0.166285	-2.41134	-1.43909	-11.0323	-5.36886	7.21653	-4.45371	-1.41105	0.654732	-0.237555	4.4299	2.88609
1376.9	-3.86784	-4.19715	10.0838	-1.98637	-1.55037	-2.07278	1.54431	-13.2873	-5.09297	13.0705	5.51931	4.9708	9.8992	-4.02032	-0.0774011	1.41189
1378.56	-6.1241	-8.61192	1.13046	-4.26801	-0.544759	6.69111	2.63859	-16.6664	-0.362864	7.62798	7.1659	4.07081	2.67821	1.56543	-3.40555	-10.9147
1380.22	-6.15319	-4.80316	2.14505	1.94567	5.50754	10.9322	4.77269	-9.56072	-0.0535538	4.51965	11.0371	1.21845	-9.5021	1.93908	3.33904	-4.4852
1381.88	-2.07592	-2.09496	-8.20314	13.0164	5.77526	0.200849	4.42959	-20.8733	-5.70914	1.1103	10.3306	-1.74188	-6.38535	3.81272	-6.52899	-10.9595
1383.53	7.60078	1.73823	-10.0016	3.74127	6.54209	-5.15768	-2.35472	-2.3028	-1.69824	1.8835	6.46041	-0.858884	1.56814	1.48049	-1.23341	-2.39349
1385.19	14.1038	2.03455	-16.2733	-2.765	0.105039	-7.05664	-6.98777	5.03614	0.105762	5.79238	5.17615	4.02049	-2.15058	0.0982751	4.34485	-4.88116
1386.85	8.4694	1.67062	-10.8439	-5.49548	7.70519	-7.68969	-6.80013	3.35916	-1.60971	-5.97533	6.68171	7.16995	-7.76398	4.58702	7.59917	-9.8741
1388.5	3.38431	-4.83342	-0.935735	-2.22674	-0.806808	-6.83179	-4.06321	1.55586	-1.37735	-2.8759	4.51257	9.89371	-2.26378	-3.41119	4.9294	-4.76517
1390.16	-6.02158	-10.171	4.58987	0.444808	-7.03165	-1.52246	-2.30613	-6.47245	-1.35069	-2.125	4.5649	4.49035	-0.660575	-8.06147	2.28402	0.621795
1391.81	-15.6942	-6.39161	11.9073	1.92068	-5.27381	-3.66548	5.49089	-7.61418	-5.66948	-3.82754	5.60548	-5.25653	-3.01012	-4.65956	-0.518513	-0.515651
1393.47	-21.1839	-0.176137	6.96199	11.2656	-2.61546	-2.9127	5.04613	-20.7867	-5.98369	-3.20813	3.39313	-8.79282	-2.6319	-6.36431	2.1458	-2.10406
1395.12	-15.1606	0.49843	4.09822	11.7847	-1.27482	-7.52885	7.6243	-22.6658	-2.68229	-0.705992	-2.98107	-6.32757	5.24421	-16.0376	-5.20987	-6.85495
1396.78	-7.96822	2.0685	0.422104	10.4852	-4.65427	-9.42689	0.558149	-6.77978	1.79566	2.15884	-2.63214	-1.49339	10.379	-15.1796	-7.31154	-0.593791
1398.43	-1.84169	3.76241	-2.65651	1.57631	-4.78795	-3.73968	-0.686845	-7.94844	5.45191	4.83308	-4.05859	-0.813081	3.98736	-13.6058	0.401764	0.927914
1400.09	-5.81028	-0.388536	3.27556	1.60851	5.7103	0.654815	-4.3403	-0.851278	4.07316	1.35812	0.31329	-0.796598	-8.23024	-11.4437	3.99208	-3.10999
1401.74	-12.1273	-2.24116	0.476117	4.09697	4.58725	-3.16642	-9.46812	5.78697	2.78662	4.60073	2.13327	1.18238	-3.73702	-8.97326	1.26795	-1.17627
1403.39	-13.906	-4.33635	0.0315552	12.7882	-0.364034	0.0644395	-12.3777	4.62753	-1.57784	5.30079	-2.29326	-5.73014	-12.587	-10.8584	2.93492	-2.08841
1405.04	-17.7421	-5.77102	0.374479	14.1937	1.41738	0.375863	-3.11427	7.77903	-2.66363	4.56786	0.900809	-4.79342	-8.22088	-4.0088	-5.01298	-5.45056
1406.7	-10.2401	-4.70028	-4.06801	9.86545	1.98151	0.0660493	2.05533	-2.63952	1.98756	-2.39425	-7.58155	-4.47366	0.723975	1.98653	-2.92862	-3.87039
1408.35	-5.34596	-4.56056	-5.15266	5.03011	0.189126	-1.00831	-1.84873	-0.943054	7.1092	-3.44806	-8.88975	1.52217	-0.528748	0.376159	3.76865	-7.10354
1410	-0.738393	-0.495457	-7.54297	-9.15857	1.20792	-0.744147	-4.42978	0.687583	6.13765	0.40367	-1.73955	-4.95706	0.822979	11.1486	4.84351	-6.54388
1411.65	-7.19559	-2.7288	-5.55956	-12.6495	0.302892	6.99282	1.87873	2.78031	3.87125	1.67665	-1.66993	-8.52716	0.0204554	14.8561	7.02993	-4.21107
1413.3	-8.25164	2.48169	-1.66137	-10.6816	0.60549	4.17306	-7.59647	14.393	-1.53588	2.32265	-3.56526	-8.43932	-3.42846	12.6754	7.09705	-2.77984
1414.95	-10.5747	5.03821	-2.4948	-5.4939	1.67275	-0.271325	-9.15052	18.4032	-1.59978	1.66541	-3.142	-2.53512	1.90636	6.7597	-1.36784	-3.00752
1416.6	-7.63924	2.97518	8.32158	3.08985	-9.60751	-6.77578	-13.5526	18.9393	-8.19432	5.16978	-2.48747	4.54288	2.3133	-3.85398	-1.87808	-0.565489
1418.25	-11.6806	1.10008	12.8875	3.57472	-10.3416	-9.27888	-10.4746	9.02737	-10.9972	6.64393	0.299845	9.13382	0.118948	-4.14186	-0.038128	-1.10891
1419.9	-2.48487	2.0023	13.587	-2.40514	-6.35312	-7.13185	-7.58868	2.71503	-8.65724	5.00236	3.41773	12.8992	-8.64399	1.53946	14.5752	5.66719
1421.55	-2.46478	-1.55496	17.3145	-7.7503	-4.41493	2.21383	-7.89689	1.89816	-7.31078	7.2996	-2.33439	11.4215	-22.6864	6.18567	17.1385	11.9289
1423.2	2.73183	-0.151171	5.17988	-2.22342	11.0031	9.92008	-9.42343	0.188004	-6.23729	4.88283	-3.19865	0.314126	-16.5213	16.5775	7.65652	8.30682
1424.85	0.610405	-0.369767	-5.34794	6.21388	5.17326	10.9454	-5.93745	-8.84786	-13.967	3.50136	-11.4815	-8.29603	-8.70594	13.4689	-0.581873	8.19184
1426.5	7.67596	8.72047	-12.0264	-1.16289	8.0913	0.0180479	-2.46174	-4.55665	-7.48368	-0.759746	-12.9593	-4.30742	4.39063	8.76814	-11.246	2.4622
1428.14	7.97387	6.65402	-13.252	2.90364	7.77655	1.27528	1.50386	-3.14398	-1.26108	-1.06665	-13.8992	-4.41969	16.655	-2.02944	-19.0922	-1.55349
1429.79	3.16017	1.63843	-7.48609	9.18963	1.79282	0.279557	-1.90515	-5.67289	-0.150418	-1.89089	-10.5149	-1.09567	13.2969	-7.59623	-10.4096	-8.36876
1431.44	4.29751	2.98951	-22.4172	-0.21491	-3.66993	4.50676	-5.51112	-11.3988	4.52232	2.15656	-8.16111	-2.64537	8.69079	-2.3928	2.69335	-10.9087
1433.09	4.92027	7.53702	-16.5002	-9.76435	7.38262	9.82994	3.22881	-1.97749	6.44252	-3.31073	1.395	3.3396	2.93903	6.32663	10.8151	-0.177787
1434.73	2.06982	1.74885	-6.06325	-7.2943	4.3529	17.0537	7.20618	-1.80736	3.32935	-2.63304	-3.29868	-0.251687	-7.34258	9.26229	6.4644	14.9047
1436.38	4.88962	1.98688	-4.69724	3.33506	7.52915	21.7985	2.92134	0.185737	-1.54876	-9.85366	-4.86535	-4.4863	-10.3943	8.94361	3.05741	10.047
1438.02	16.4899	5.22585	-3.24763	-0.40791	3.07665	16.0189	6.98152	3.38363	-5.86523	0.272947	0.0877213	-6.77434	-1.78092	4.99065	3.8226	11.046
1439.67	17.0352	11.1949	2.67273	-5.8731	5.53083	-0.945425	12.9595	6.50984	-3.39899	-5.86574	-2.47399	1.42551	10.6353	1.92959	-4.55674	7.19428
1441.31	8.31717	12.7737	6.84209	2.38888	6.84301	-3.93125	6.2708	6.30532	-1.70194	-8.72201	-3.22232	4.66469	12.2063	-3.77717	-5.5335	5.57265
1442.96	6.72896	11.8462	1.34373	2.4471	1.50218	-4.31084	-2.37564	3.1394	2.94636	-5.66422	4.75352	3.54966	7.15279	-7.0423	2.02945	4.44561
1444.6	9.93384	12.5274	-3.52328	0.533171	-2.60924	-6.05424	-3.32772	0.615266	4.63738	-1.94866	6.19913	-0.499602	6.0419	-8.46066	1.79735	9.76794
1446.25	7.21201	10.9103	-2.54935	4.25529	-3.77625	-7.46963	3.90937	-5.2931	-2.71484	-6.39366	8.27244	-5.0109	-2.26454	-6.37474	-2.65305	10.9916
1447.89	4.27363	3.4626	-1.65963	5.18606	-4.94523	-1.56422	-0.851441	-7.33775	-4.74425	-5.10933	6.41662	-4.94416	-4.42264	-6.31502	-4.4939	7.09837
1449.53	4.92291	0.277538	-1.81224	1.20993	-4.53719	10.1837	1.30019	0.817566	0.710161	-9.66331	8.16603	-2.89114	-3.81063	-9.68157	-1.82441	2.67643
1451.18	10.1927	-1.06566	-3.67955	-9.89829	-1.66511	9.76087	5.67005	6.09774	7.51111	-1.85671	12.2676	-1.3142	1.05352	-3.21313	0.511463	-1.45499
1452.82	-2.18044	4.12806	-4.79517	-12.3801	-0.938463	4.86509	5.03043	7.47822	3.3225	-12.6916	-1.12405	1.53485	4.23179	2.81369	-5.28956	-3.15046
1454.46	-0.252977	4.83134	-5.66303	-14.3396	-1.79935	4.02896	-0.933148	5.26164	4.51833	-7.47481	-1.12201	-0.696315	4.67535	8.09389	-6.23279	-3.7341
1456.1	5.15149	6.66848	-4.29783	-13.9218	1.92224	0.416723	-1.38221	4.52845	4.6549	-3.35833	0.101739	-2.04137	5.01285	8.06544	-1.2497	-0.222008
1457.74	-0.0555883	7.11033	6.76659	-7.72252	2.6125	-10.7296	-0.462854	-5.08731	-1.30987	-3.17862	-1.15652	2.9557	1.71178	-3.0085	-0.694507	2.72549
1459.39	-6.27911	1.01482	3.33777	3.56696	-2.85274	-16.7148	-2.13741	-21.2083	-13.427	-4.03915	-5.1135	-1.37787	-5.52857	-6.41052	-3.95625	-2.98955
1461.03	-10.6766	5.11382	-5.25202	8.22606	-3.28181	-9.70233	-1.86962	-9.25976	-11.6453	-6.52114	2.193	5.90743	-6.63236	-3.66035	-0.951036	-10.6899
1462.67	-14.7582	8.33479	-4.61836	15.4671	-8.0224	-2.46453	1.91732	0.567074	-5.63781	-9.09514	8.78154	10.7494	-2.15668	0.199826	-3.16949	-10.0785
1464.31	-5.51176	7.08811	-4.12591	15.2954	-11.091	-1.96781	-1.84412	-4.24822	-2.29266	-5.71555	1.93823	4.55062	1.83425	4.43438	-6.84927	-9.00036
1465.95	-2.72869	8.43686	-4.29788	17.5115	-2.90572	-2.255	-3.2439	5.26268	-1.65433	-6.06855	0.751315	5.61997	6.44573	10.7621	-11.2197	-7.56928
1467.59	7.39743	0.820875	-4.94958	1.39961	-3.7062	4.70038	1.6355	3.27935	5.39544	4.98983	1.37665	3.61514	13.0471	9.43386	-3.81329	-5.30755
1469.23	14.1586	-4.3257	0.158936	2.15962	-1.75416	-0.711743	5.97412	0.133991	4.65614	9.97045	-1.44023	0.546683	17.1115	13.8171	-4.36254	-5.29943
1470.87	11.8379	-6.44119	-2.62979	3.60414	-6.12756	-11.5008	4.07542	-3.42956	0.372163	9.39274	-2.79929	-0.0875702	13.5065	7.54808	-1.74459	1.97652
1472.5	5.97915	-9.44686	1.56083	-1.00296	-12.9748	-15.1171	7.09296	-0.824935	-5.60641	6.70119	-6.66824	-4.69853	7.24315	2.83492	0.346866	6.5433
1474.14	1.87021	-2.81184	-2.15965	-2.98415	-14.9244	-14.0682	6.6305	15.8274	0.509772	0.354298	0.403194	4.87969	6.57	-3.27653	4.60079	4.06523
1475.78	-7.11594	0.183862	7.8933	-3.65211	-17.7644	-18.2007	5.80923	16.1861	-2.6628	-7.98895	-3.68988	6.83094	4.59853	-4.82562	-2.82648	1.20095
1477.42	0.407367	-0.0240559	4.16798	-1.38369	-9.72311	-16.6773	4.0821	7.39525	-1.55788	-8.90432	-13.9886	3.55971	5.4177	-5.31804	-9.20003	5.04636
1479.05	2.43945	2.79963	1.02723	-2.85069	4.92519	-15.0179	3.94736	-2.29136	1.63157	-6.80162	-12.7578	3.48753	-1.68768	-0.840107	-10.6265	1.18899
1480.69	2.55478	2.63669	1.82157	-10.7621	7.08258	-3.96291	4.50276	-7.9101	8.32436	2.499	-12.6716	2.19543	-0.178558	-1.81005	-6.53307	4.89167
1482.33	1.16673	5.33815	9.59238	-7.61556	8.27235	0.645131	-0.660312	-18.5963	3.88305	10.0561	-3.03556	-6.972	-5.4995	6.10193	-1.76468	4.06501
1483.96	-0.393418	3.06807	6.13897	3.92756	11.1876	0.616945	2.75955	-7.46058	1.62511	6.85277	7.42845	-7.85934	-7.75897	1.74452	5.51452	9.75209
1485.6	-1.46407	-2.96043	4.78152	2.40347	11.7902	3.10169	8.41047	-2.84767	2.90727	5.39271	10.2287	-7.93324	-4.49235	2.3103	4.27229	1.00875
1487.23	-0.725092	-5.62391	8.19983	5.16265	9.02135	0.599203	7.16945	6.95781	3.78613	4.36578	12.3166	-4.8702	0.286616	-5.92812	5.55788	1.19052
1488.87	-4.57927	-4.57135	12.6349	3.83068	6.28174	-0.18819	10.6126	12.0343	0.142357	-1.81613	4.60296	0.0442033	-0.2928	-9.86575	2.69163	3.09914
1490.5	-1.41192	-12.2741	5.28486	5.50767	5.01738	11.924	12.612	9.6707	0.715861	2.68821	-2.49069	2.47826	2.59703	-2.33467	-2.3816	2.69794
1492.14	4.36879	-11.1841	-0.905406	8.05699	0.737638	9.12688	9.12326	2.02254	1.69666	11.2363	-3.82424	-3.02301	-3.53594	2.50682	-6.07573	-0.949298
1493.77	10.2639	-8.52145	-2.27951	10.5577	-10.6439	13.0759	7.54319	2.62514	0.341735	10.2819	-3.22261	-7.11953	-1.68065	4.58721	-9.71813	3.9212
1495.41	7.48496	-5.10402	4.27636	4.20896	-4.30334	13.6648	6.41824	-1.86322	-0.528108	7.83783	-0.620417	-7.25044	-7.22284	5.61271	-0.614733	3.49391
1497.04	7.3844	-9.27449	9.36047	8.38644	3.85414	5.53409	5.75595	5.52145	1.41509	1.83055	2.67348	0.847393	3.55084	0.481774	0.0107121	4.1276
1498.67	6.59573	-9.64116	3.73511	-2.50008	4.95567	7.33578	-0.679555	-2.091	4.79732	3.79787	-3.52831	0.611323	4.69645	6.86512	2.50148	-3.2002
1500.3	7.08504	-7.4643	1.07295	-7.24869	-2.82491	6.19719	-2.46752	1.58413	2.22761	8.69028	-4.15082	-4.37351	1.59682	5.44013	7.91302	-2.75809
1501.94	5.28719	-4.49298	2.20667	-11.9356	-1.08427	9.88382	0.450294	7.20812	1.42777	10.2537	-4.20624	2.60355	2.70116	2.386	10.6637	-4.85337
1503.57	2.49989	-5.26729	-2.07404	-18.3287	0.322838	12.1762	-2.75738	7.41845	-0.757005	13.1903	-3.85246	4.56612	-2.39767	7.38709	12.4476	-8.14516
1505.2	3.84524	-5.30719	-4.8397	-13.8563	-3.07971	5.73922	-5.6491	6.50937	1.94401	12.071	0.869981	0.900699	-5.20363	5.91038	9.87466	-10.9379
1506.83	6.962	-6.47459	-0.281523	-9.59812	-2.9333	-0.00995007	-6.40272	9.26932	0.407708	5.13514	1.58493	-2.66807	-8.70347	-0.536576	5.61568	-7.84207
1508.46	3.48056	-6.05326	-2.42464	0.448813	1.70075	-1.40909	-4.0273	7.49637	3.04234	-1.71787	1.3646	-1.2592	-12.5322	-4.83895	6.2457	-8.23433
1510.09	4.26685	-11.0858	11.434	4.62762	3.65652	-5.69921	-2.66375	7.64167	5.82103	-5.06072	7.98871	5.05702	-6.94054	-6.97145	2.87817	-6.52448
1511.72	1.59734	-8.05496	8.71532	5.11986	-3.19704	-0.224991	-2.71126	13.0462	1.99379	-7.45402	4.65676	4.13846	-11.6058	-5.0445	12.5528	-2.39887
1513.35	2.82085	-6.74936	0.877534	1.32845	-4.06159	3.22536	-1.721	12.965	2.54277	-5.94218	8.2	6.59222	-5.90435	-7.50548	12.9205	-7.54181
1514.98	5.99194	-5.5482	-6.69338	0.420425	-3.59687	1.26566	2.31776	-2.97644	0.474445	-2.8666	10.6721	6.43208	-3.11357	-9.05439	7.618	-10.8622
1516.61	3.31382	3.54189	-21.2462	1.69437	-0.0906803	0.162404	4.59903	-3.48633	2.13255	-5.10419	10.7967	1.86972	-7.81213	1.25214	3.37352	-2.84262
1518.24	-1.57781	1.57624	-24.7433	2.42452	0.676686	-1.92602	0.674382	-4.02448	-0.654257	-7.23175	11.1886	0.646616	-5.88343	7.71876	-0.844147	-5.20204
1519.87	1.45989	7.31279	-15.3464	2.72823	6.71339	-8.6016	-2.42929	-1.05771	0.0841428	-4.39007	8.1655	-0.135918	-1.43985	6.79767	-9.22251	-6.67146
1521.5	1.29719	6.22734	-13.5874	10.313	0.694754	-10.5982	-1.03111	-2.36875	-2.37378	-5.92494	-2.01277	4.1424	2.02178	4.79785	-16.1747	-5.30126
1523.13	1.55604	3.50043	3.15701	8.06512	7.89286	-2.064	1.12783	-7.22162	2.72375	-5.01456	0.489505	9.60443	7.47667	3.65182	-10.7306	-2.59944
1524.75	4.28633	3.27363	13.6799	10.576	3.63141	-7.6439	2.56892	-0.927789	-5.2832	-5.98816	-2.23429	6.17085	4.20821	-4.95414	-2.71562	3.5166
1526.38	9.38962	-0.284778	9.6254	8.4718	0.586145	5.26432	-1.12207	0.715423	0.0235327	0.850534	-1.30852	7.54524	8.3447	-4.56549	-1.64264	0.74479
1528.01	5.41527	-0.994949	8.24783	3.38228	4.3433	5.03166	-2.23595	-2.52246	0.761081	1.04452	-6.30828	7.88959	5.62175	-6.20437	4.81682	6.13897
1529.63	6.15325	2.03379	-3.6666	2.15723	4.11808	7.0295	-2.30052	1.51538	2.79484	-1.17625	-1.00744	3.97724	7.78718	-3.47956	3.44808	8.18504
1531.26	3.2422	-0.122303	-13.7548	3.82276	3.42668	3.96678	-3.96998	7.66845	-6.83676	-1.76801	-3.67036	0.926951	4.98666	0.738422	3.20695	5.17862
1532.89	4.77406	7.07603	-17.0997	4.05919	1.09871	-0.0899075	-4.42088	15.8762	-7.18522	-0.717303	-2.38975	-5.94623	7.77098	0.28132	0.185553	3.57935
1534.51	3.58934	4.32706	-16.5796	2.13347	-3.98987	0.627677	-3.84631	10.3206	-9.72842	-3.54918	-6.94592	-6.39514	4.48198	2.02495	0.544198	5.96438
1536.14	5.86118	4.54869	-12.583	1.62579	-3.16104	3.24531	-4.40517	-4.04894	-5.40971	-0.187401	-4.54126	-8.21621	4.07135	-2.56742	3.38965	8.42561
1537.76	8.02181	1.96512	-10.5094	4.75807	-11.8825	-1.95674	-2.72216	-11.1855	-7.29602	3.7046	-7.98274	-13.329	0.0974191	-7.60542	3.845	9.04516
1539.39	13.7642	3.66899	-16.5772	0.694442	-6.30518	1.43709	-4.65523	-13.4461	1.09354	7.76468	-5.57592	-4.29118	5.54715	-3.75569	3.94447	6.49226
1541.01	8.60734	7.12074	-15.0012	-1.14546	3.13532	-2.48996	-4.73589	-12.0144	1.5705	7.21784	-5.4595	-2.6069	-1.01675	-1.69121	9.53683	8.59083
1542.63	8.45151	5.68581	-11.0423	-4.45146	10.3811	1.25389	-3.85956	-14.2098	-2.08147	5.57299	-4.29213	-5.27915	0.1985	4.15503	4.69144	1.53266
1544.26	0.675287	10.6063	-9.60946	-8.38011	19.0951	3.78008	1.45154	-1.17931	-6.29612	-0.301501	-10.9201	-1.78594	-0.364812	7.75637	6.62653	2.35218
1545.88	0.92919	10.8681	-2.66949	-19.3333	15.8161	1.07913	-1.93203	11.8784	-5.79685	1.52326	-14.123	-4.54013	2.06232	5.97312	8.65535	3.82243
1547.5	-3.70097	6.85614	-1.38683	-17.8721	5.34846	-6.68312	-3.78286	5.90066	-10.8927	-2.16504	-6.09729	1.69062	-2.23172	6.74719	4.72833	-6.1429
1549.13	-4.49707	1.71207	3.49059	-16.4118	-1.86861	-8.34203	-5.44388	6.40167	-8.55862	-1.60525	-5.61334	9.28168	3.16861	3.26746	-3.19424	-9.9453
1550.75	-3.90034	-2.53829	6.23153	-14.5266	-16.5367	-6.68169	-8.37847	-0.10879	-2.99543	0.328571	-2.33681	7.54165	1.82231	-2.67161	1.73185	-12.6578
1552.37	-1.62183	-1.03032	0.378005	-9.96551	-12.1585	-5.21711	-7.34482	-6.89634	7.85503	-0.347638	-3.07651	10.7357	1.74032	-8.45631	-2.31009	-7.3593
1553.99	-9.09125	2.27593	-2.80742	-3.06453	-10.4317	-0.727869	-7.80464	-3.65242	7.10377	-0.534953	2.59389	2.80679	-10.6148	-3.09894	2.89063	-2.06853
1555.61	-11.9973	0.692021	9.34838	-0.179497	1.00686	5.00646	-2.29888	-6.75305	1.93314	1.56788	-4.4611	-2.16586	-9.46259	3.36134	-0.743225	5.85985
1557.23	-13.0785	6.11623	15.5938	-4.37317	3.6316	8.66723	3.32184	-0.0248144	-0.00808065	3.39513	-13.8173	-4.32369	-4.16017	4.42602	2.22349	16.397
1558.86	-6.83357	4.76576	14.1114	-8.35346	-5.09259	2.09003	1.41922	-8.16819	-3.07054	9.68206	-15.2819	-10.059	-0.270591	3.60591	0.994276	17.7767
1560.47	-6.93856	2.35225	10.2477	-0.819745	-3.76474	-2.32883	4.95106	-16.2806	-6.73726	4.5039	-15.8654	-13.763	0.968083	6.73847	-8.85754	8.0357
1562.09	0.94153	-1.1298	2.14494	0.177987	-2.32936	3.8428	9.19941	-7.35749	-2.9807	2.47622	-9.66014	-8.38902	5.78025	4.61074	-11.081	5.64069
1563.71	4.85488	-3.26651	5.1687	1.33331	-3.61214	1.26824	1.8173	-15.3243	-1.42821	1.55924	-8.53691	-10.6749	5.71092	-1.43593	-7.07487	2.03672
1565.33	7.6643	0.529747	-3.10554	4.40236	7.53246	1.86162	-0.460932	-7.7635	7.51936	-5.05688	-3.1978	-1.47271	2.29044	-9.18585	-6.49417	-4.10146
1566.95	2.5954	1.99052	-6.89289	7.12542	13.5363	-0.480385	-3.17533	-5.9512	9.39041	-10.0463	5.0999	-3.68104	-5.71265	-8.17856	-2.43122	-7.83159
1568.57	1.64018	1.271	-3.77172	8.6608	16.2162	-1.70228	-2.73285	3.80121	7.89772	-10.8353	5.6317	2.94402	-4.25767	-5.32534	-4.66709	-6.02968
1570.19	0.613663	-4.95766	1.07536	4.93466	2.66649	-8.27858	1.4217	5.73625	-2.55548	-2.5023	4.56425	0.988059	0.0600559	2.15109	-3.78726	-3.0048
1571.81	-4.38064	-7.96017	5.14076	2.39366	-3.54899	-7.88583	0.0990471	2.33406	-3.28205	-1.21266	0.866766	1.66861	-0.416139	-0.392478	1.40466	-5.47117
1573.42	-14.5235	-8.94792	9.97676	3.57259	-4.86299	-4.55243	8.98128	7.20846	-6.11203	-7.8497	4.08495	-2.05104	-2.88362	6.42328	-1.77357	-7.63625
1575.04	-9.24253	-9.35094	9.52332	6.24009	-8.80137	-6.30689	10.1621	7.00714	-3.27597	-3.49558	8.38263	4.53609	1.11091	0.545726	-1.93421	-5.33014
1576.66	-11.1086	-4.91022	15.9442	3.73243	-2.97156	-7.569	6.83017	1.25618	2.26448	-5.62546	4.4821	7.02798	1.55856	-7.17103	-0.269705	-2.59856
1578.27	-5.71255	0.83509	8.77955	7.65723	1.17118	-4.53549	7.96249	0.535834	5.14365	-5.88946	8.58408	9.25703	1.06953	-13.4015	0.301202	-4.83953
1579.89	-3.90151	1.44073	0.321835	15.5895	3.50627	-6.18676	7.24958	-6.34321	8.4623	-3.56408	9.43151	4.73764	-1.21385	-15.0831	-6.14707	-2.09815
1581.51	-5.2724	2.18687	-5.35631	19.0445	1.9802	-4.11087	8.00006	-8.81437	8.12113	-2.21289	11.3387	4.9115	-1.48248	-10.4868	-11.6631	-2.06272
1583.12	-4.28489	-4.25672	-0.554764	14.7917	-3.30387	4.1118	10.43	-9.5872	6.17339	2.7732	10.5699	-1.85357	-3.35024	-3.41157	-12.1409	4.42544
1584.74	-4.90826	-5.15109	-0.543625	10.637	-5.19984	9.75622	6.90897	-8.89738	4.15925	7.32837	7.43541	-4.27145	-7.06716	-3.55731	-4.49829	7.50775
1586.35	-9.6359	-1.47432	-0.421863	6.57823	-9.27049	4.30794	8.34752	-6.32021	-1.21246	5.15344	11.8074	-4.89328	-9.61601	4.16038	-3.72351	2.95526
1587.96	-3.45225	0.282807	-0.136203	2.76367	-8.80057	-0.845608	0.0232609	-6.87562	2.78911	9.19054	6.27927	-0.0282609	-3.34386	-0.93869	-1.27087	3.18914
1589.58	-1.08039	1.9956	-4.0883	-5.31263	-3.53945	4.78013	2.11284	-0.664074	8.35881	3.01766	3.38485	5.64129	-4.03631	-5.87359	7.05974	2.92848
1591.19	2.91317	4.67691	-9.05454	-6.75514	0.904101	6.60269	5.80567	0.406655	3.82319	-0.838606	2.93621	1.18316	1.47869	-2.88399	5.48267	-0.404457
1592.81	2.21379	6.03623	-10.2696	-4.23134	1.55241	2.45811	4.94199	6.24964	3.56818	-4.50793	6.15471	2.27681	3.90803	-1.57682	1.30567	-5.06633
1594.42	-1.69938	6.31776	-5.61333	1.09835	-0.366137	6.13337	5.52336	2.34322	0.951095	-5.69051	4.09718	0.737232	4.08863	3.19482	-5.12224	-7.58041
1596.03	-5.5327	1.72313	2.88117	-3.43413	-3.60052	19.5425	6.90525	7.73313	1.71221	-3.95403	6.21101	-3.12074	0.00892923	6.27122	-1.86769	-2.34528
1597.64	-2.52406	1.77849	8.77821	2.05864	-6.6249	13.4432	4.97198	1.8951	-2.89572	1.95797	5.57389	-6.06065	0.747248	6.39039	-1.22007	-1.93326
1599.26	-0.686938	3.57169	14.0305	4.58167	-2.14907	0.433136	-1.39734	2.7552	-1.44557	3.99265	5.93322	-2.49574	-0.0491655	3.21305	2.53978	-3.83689
1600.87	0.718946	3.30471	13.396	6.56945	-3.19848	-4.15696	-4.90548	0.32078	1.24479	5.88677	2.91887	1.49097	-0.0121615	-1.32594	3.09939	1.78916
1602.48	4.3517	3.2884	11.7241	4.17366	0.346239	-9.06628	-4.37772	2.79981	1.24343	1.74443	3.97612	3.75126	-4.25161	-2.47032	5.37054	1.1745
1604.09	-0.501988	2.59923	7.2164	4.74806	5.32415	-9.65397	-2.76313	1.63944	-3.27573	-3.53637	2.44059	-0.361826	-6.50728	-0.628743	1.74665	1.67066
1605.7	-1.1651	3.99379	4.162	-3.80177	4.57924	-7.90801	-2.59151	5.05277	-1.61489	-4.21341	3.06648	2.09181	-7.46661	-0.550882	2.93714	-0.470994
1607.31	-2.26644	4.1229	3.16966	-6.2645	1.45632	-5.14868	-2.14516	5.57676	-2.37717	-2.9231	0.242115	2.45074	-7.54013	-0.306377	-0.508462	2.0748
1608.92	-3.46661	2.21021	3.25001	-9.23946	-2.43772	0.192355	-2.22398	4.76109	-1.72186	2.47887	-0.426842	1.19512	-2.91534	-0.221607	1.26102	5.32344
1610.53	-3.9075	1.38621	3.94487	-3.16383	-3.22284	-0.852548	-1.0345	4.10968	-4.31371	4.76923	-2.4074	-0.0615046	-2.13714	4.88564	-0.568657	4.89847
1612.14	-2.00261	1.35572	2.03729	1.08817	-2.78735	1.02126	-4.03516	-1.258	-3.51062	7.25646	-5.31517	-0.164898	-3.65101	8.23694	4.18453	4.89085
1613.75	-2.92749	-0.181887	0.235293	7.4729	-10.2904	1.97645	0.937414	-9.02137	-5.09005	6.38375	-2.13808	-1.7251	-2.23889	15.5395	0.129042	7.20849
1615.36	-1.36631	-1.08136	6.37915	8.75921	-2.74258	-3.59453	0.581349	-8.05011	-2.70891	0.245216	-6.62619	-1.6487	2.95192	17.4203	-0.267431	3.12281
1616.97	-2.1235	-4.7685	-2.90403	9.97657	0.0510437	-4.58654	0.98064	-9.6216	-1.20109	-3.34881	-9.0984	-1.00884	3.14822	14.4301	-0.816454	-0.706603
1618.58	1.73353	2.56357	-6.27642	-1.46123	5.81884	-2.29449	2.40206	-4.46912	3.85615	-3.49799	-6.79223	-1.53627	4.24109	10.9695	2.66127	-4.62888
1620.18	5.55838	4.30074	-3.075	-7.62346	3.67854	-3.37769	2.4772	-3.32243	3.5121	-2.6807	-8.07632	-1.1585	7.02931	2.27973	2.63242	-3.21218
1621.79	5.94937	6.96536	-4.36095	-9.86068	4.45629	-0.556145	1.63699	-0.623333	4.23208	-0.746386	0.71131	-0.585105	8.45877	0.199403	7.74852	-3.82739
1623.4	0.625965	7.35579	0.291136	-14.5955	7.44105	2.41475	-0.708738	1.06893	2.6313	-0.655639	1.18758	0.857038	2.31495	-1.61287	12.356	-3.15567
1625	-2.94511	7.5241	2.984	-14.3536	4.37708	8.29562	-1.59573	0.304686	0.596894	-0.163268	-0.0803486	0.254492	-3.33994	-4.37959	14.4973	-1.59455
1626.61	-2.87014	5.28287	6.30285	-14.0835	-0.188575	11.1927	4.05062	0.563961	0.553847	-0.740208	4.05633	-5.20651	-6.11128	-2.41345	9.63004	0.440724
1628.22	6.17173	4.01534	6.15072	-7.10048	2.18835	8.15345	4.80778	4.51542	6.03954	1.08883	3.23398	-3.25882	-2.42103	-2.16926	4.64596	4.04839
1629.82	13.0444	1.97428	-2.22806	-1.14277	-0.365389	2.46832	4.70378	6.14578	7.46541	3.08907	6.00445	0.723826	1.70941	-1.76428	2.48046	5.06143
1631.43	13.8459	3.07489	-3.50949	0.514788	3.20899	-2.69441	0.666416	-0.00448771	2.4413	4.88702	3.35895	1.28236	5.57503	2.13776	-2.39253	0.630418
1633.03	17.5415	0.0517721	-5.01735	5.15581	-2.04584	-1.36598	-1.48883	-6.9245	-0.453973	7.12058	-7.83335	-2.21216	10.5873	2.26825	-5.80546	3.38352
1634.64	14.5112	-3.17993	-2.46841	5.48565	1.38045	-1.05347	-5.53577	-8.58911	3.25243	8.25444	-8.81419	-1.62503	10.6444	4.8958	-5.39442	-1.23776
1636.24	7.08385	-4.84575	3.32398	3.26428	5.72597	-3.94432	-8.82486	-2.12296	-1.00562	5.2817	-14.8746	1.35989	4.19651	0.859831	-3.97725	-0.731428
1637.85	0.747862	-6.1779	2.19093	-3.78729	7.14432	-0.521365	-10.5138	9.53067	-1.59001	1.13873	-16.5376	3.91364	1.53512	-3.53592	-3.35673	-2.03341
1639.45	-6.02082	-3.41988	3.73364	-7.3656	7.34681	-0.199452	-8.0422	10.631	-3.44178	-0.983662	-13.5115	4.08136	-2.38675	-2.69885	-6.36731	-5.01067
1641.05	-0.00702317	-1.79478	-7.23187	0.771778	-1.73893	2.58502	-6.3518	15.523	1.45474	1.88471	2.14324	6.71442	-4.09056	-8.90322	-3.91914	-0.466979
1642.66	1.39811	-1.7527	-2.20286	-2.70502	-2.97405	3.29554	0.708048	15.9754	-1.16395	3.87488	7.08343	5.29942	-2.09333	-8.00872	1.70349	1.52562
1644.26	3.86928	-2.21596	-9.58352	-1.98629	-4.92448	6.48744	0.208286	4.751	-2.3764	3.42466	6.81275	3.78347	-1.16595	-2.83051	-0.232352	-6.95756
1645.86	9.81099	-2.46864	-13.5253	0.0507715	-4.57188	6.23958	0.436142	0.02573	-0.708516	4.73364	-2.8121	-2.16171	2.84233	-6.60595	1.94936	-2.16133
1647.46	6.0593	-4.0095	-7.44415	2.51604	-4.50155	-0.488316	-2.68415	-1.7296	2.28291	4.78031	-4.99684	2.06734	5.90091	-7.5548	-5.27532	-6.01776
1649.07	5.68971	-6.53819	-1.82039	2.98782	-3.58475	-5.07214	-1.76013	-0.175014	-1.11648	-2.04367	-5.60628	7.19618	0.492916	-7.44695	-4.35269	-4.41456
1650.67	9.34828	-8.68517	0.889309	-4.32396	0.98574	-1.81442	-8.27641	6.18021	-0.175034	-0.262655	-7.86121	9.29114	7.15253	-1.57975	-0.310081	-6.50918
1652.27	-4.33192	-11.6585	13.7363	-13.7975	5.94893	-3.3705	-11.5356	1.6298	-1.92418	2.97679	-10.9338	8.35914	5.14464	-1.66045	3.65432	-3.36614
1653.87	-10.1387	-9.65992	6.92038	-15.9568	1.79161	0.725784	-11.3683	8.66175	3.30528	-2.08112	-5.79178	8.40504	0.393408	-7.79423	9.47331	-3.0669
1655.47	-6.22893	-6.93234	9.39524	-20.3356	-1.34394	6.39656	-2.4263	8.18965	0.950245	1.97546	-9.0455	-2.02761	0.582752	-4.64652	6.45111	5.82847
1657.07	-2.88199	-1.52908	-2.1513	-14.4872	-5.37633	10.3954	-1.0276	12.3548	5.98454	-3.47849	-4.28615	-2.3792	0.33182	-4.77555	2.52709	6.58844
1658.67	-0.255446	-2.40492	-6.7504	-7.39006	-3.35855	6.97668	-3.08287	15.8046	5.47223	-3.12308	-4.66371	-1.10686	4.08064	-8.42237	1.42901	9.81504
1660.27	-9.19013	-2.94859	-4.29845	5.92108	-2.97774	3.97741	1.47857	17.3246	1.89919	-11.1517	6.99328	7.64646	4.65942	-7.16552	-9.563	3.90039
1661.87	-1.49774	-4.98212	2.94435	1.26718	0.929641	-0.661952	-0.130983	13.1931	2.77063	-10.3516	7.92406	13.783	7.578	-9.0112	-7.00632	3.73104
1663.47	12.0437	-11.456	3.11454	2.39962	1.20956	-1.28788	-2.11531	11.0434	-0.871453	2.66855	10.356	8.57039	13.0941	-7.64389	-2.38176	1.52115
1665.06	8.20997	-19.1753	12.3	-3.87677	3.82511	3.32114	-6.96973	-3.4094	-0.309567	6.70165	3.93416	3.20384	10.3717	-0.151734	1.15164	0.107677
1666.66	5.92463	-19.6472	0.0158131	2.83675	3.82981	7.05692	0.0552321	-13.073	-1.06324	-0.232433	1.41018	-2.77678	5.06006	1.64406	-5.25106	-5.28275
1668.26	5.5837	-14.9435	-5.26422	7.00828	1.84992	-0.521414	-1.13359	-14.7304	-6.78874	-3.36428	-2.95084	-11.8379	-3.59437	6.54413	-9.13469	-4.05861
1669.86	-0.491188	-12.0068	-1.2645	7.78403	5.08253	-5.68525	-3.83405	-11.1572	-4.29054	-5.56481	-2.21512	-4.52736	-6.30759	1.37529	-0.569476	-2.6782
1671.46	-2.4116	-13.3775	-0.326313	12.5133	11.2088	-8.52698	-6.03197	-9.94959	-3.87745	-5.93116	-1.93181	-1.53589	-10.6363	-5.11148	6.35619	-1.73522
1673.05	-8.86859	-10.14	5.43899	19.7088	11.6817	-5.70037	-0.244265	-2.2766	-3.43953	-12.3035	7.32306	6.29275	-17.1166	-4.88041	6.92442	-4.21446
1674.65	-15.1636	-5.64715	3.68805	17.6972	5.91518	-2.10201	-0.885659	6.31033	-4.16654	-5.64218	9.69828	2.22121	-15.3586	-3.71026	10.3288	-1.32432
1676.24	-1.62427	-4.68826	-0.238461	19.3124	-4.13159	-6.04828	3.00033	4.08441	-4.3795	5.1691	11.3883	-3.47253	-12.944	-3.12705	7.17886	1.51247
1677.84	-3.06518	-6.68283	0.831698	17.5438	-10.7324	5.41604	3.13798	-6.712	1.83065	7.12422	5.92734	-3.58987	-10.9719	2.96232	3.89206	-4.67835
1679.44	-4.413	-3.68282	-3.74496	10.6421	-15.4451	2.50302	13.6997	-7.83985	0.474331	5.71318	3.3637	-6.98016	-7.17847	-3.00215	-1.91343	0.45525
1681.03	-13.2784	-0.607723	-4.80698	-3.63896	-7.51244	-9.48167	9.97709	-3.52124	2.46063	-3.3035	-1.07628	3.14703	-2.71734	-5.50745	-4.61197	-1.67967
1682.63	-21.3459	-1.80548	9.05764	-11.3792	-1.46819	-11.7986	4.44843	-2.81531	0.264825	-4.3535	-1.01604	6.98046	3.26845	-6.61484	-0.836768	2.17412
1684.22	-17.4375	-5.04781	3.69498	-11.2067	13.6437	-12.9151	-1.65525	-4.04095	1.19202	-1.70922	6.04589	8.75876	2.14014	-4.86416	2.65205	1.94215
1685.81	-24.6431	-9.1174	8.99312	-3.05292	12.6286	-1.91832	-7.18529	6.18328	0.0445779	-8.32341	12.8339	14.9816	0.572432	7.1894	8.29391	0.295483
1687.41	-26.9924	-2.72435	7.56944	2.219	19.0063	-4.80153	-8.5906	10.474	-9.99375	-10.4977	15.0248	6.48517	-2.53385	16.1898	5.46979	0.586593
1689	-9.55931	-1.06519	10.0697	12.2002	11.8259	-6.70288	-15.2872	3.29642	-12.3264	-7.8183	4.01204	2.1641	-3.6134	13.821	-2.34812	1.10806
1690.6	-2.29733	-2.76673	4.79346	12.735	12.3283	-2.28932	-13.6124	-3.40907	-6.29258	-12.5399	-0.312744	0.121742	-7.83102	7.16346	0.0409765	-5.65852
1692.19	4.99039	5.44227	-0.379977	2.20071	7.25082	-12.0784	-6.77669	-7.69292	-6.74079	-16.0455	-5.73536	-2.5302	0.472967	4.13155	1.173	-4.47533
1693.78	7.13444	1.23087	-6.58155	-19.4446	4.79891	-12.9087	-3.83735	-18.7477	-3.02224	-20.3245	-6.34438	-4.29376	3.93707	-3.53337	5.97468	-5.9839
1695.37	3.67941	-5.38289	3.20697	-21.0171	0.845803	-9.58281	-3.55944	-18.5052	-4.69063	-13.6317	-0.21643	-7.06823	1.7895	-2.96338	8.97902	-0.0837335
1696.96	0.779305	-4.70552	-16.0278	-12.5733	7.67044	-0.10477	0.000708434	-16.3448	0.242973	-6.29999	6.48636	-2.28117	4.36158	7.30423	5.39393	-3.61888
1698.56	-3.36689	-1.60153	-13.5484	-7.58178	-2.27803	7.6067	1.1634	-5.57537	1.01086	0.474644	6.75061	-3.42319	14.0278	8.15909	7.59064	9.96457
1700.15	-3.93251	9.54249	-4.39862	-11.5756	-0.606559	-1.18651	-2.67982	-1.40656	-5.0174	12.06	0.953849	-13.9101	20.5739	8.44499	-3.78854	15.0081
1701.74	-3.10482	-2.15854	7.09592	0.596326	-9.97803	5.28183	-7.44828	-6.71501	-4.28509	16.2796	-5.35856	-18.2356	14.5679	-2.64447	-10.5114	16.8415
1703.33	-5.80195	-3.79244	7.62276	-0.525378	1.96269	10.5819	-2.48115	-2.95437	3.74808	15.0249	-0.810951	-18.166	9.52388	-4.38621	-6.74907	7.81433
1704.92	-3.72314	-0.804943	-0.329583	-0.0611395	1.03844	8.70092	9.17394	-3.28855	4.9388	6.36659	2.89358	-21.4193	8.74692	-7.25796	-2.92545	1.82179
1706.51	0.983128	-9.3716	-3.04386	-1.87366	-7.34087	11.8734	11.3386	-0.051168	-0.312465	1.96312	2.78081	-22.6334	2.20001	-8.20977	9.33482	-0.817177
1708.1	-2.44416	-17.5001	3.25412	-0.804233	-6.49155	1.59576	14.2176	9.72388	-1.58285	-6.36767	8.1649	-8.29838	-2.80784	-4.03962	9.22785	-5.40603
1709.69	-1.86218	-3.58174	-10.3432	6.25706	-5.49799	9.29471	7.86168	16.0137	5.03318	-13.9388	5.37598	-7.76014	-7.54232	5.53198	8.3681	1.0805
1711.28	8.21237	7.58959	-20.8213	-0.871703	-9.61067	0.84682	1.24246	20.0507	5.16558	-7.6647	13.1671	-4.23386	-0.503442	9.01578	4.9964	7.1868
1712.87	4.33625	9.36493	-9.07793	-11.311	-10.2784	-7.74485	-10.8787	9.09906	1.31046	-3.98262	6.82614	-11.9504	1.81969	11.1751	-4.57443	3.36221
1714.45	-1.02491	2.01478	-11.1495	-4.71681	-13.1691	-0.860524	-17.8514	6.15495	2.729	-0.136958	10.0808	-8.55432	-4.14789	8.36012	-8.19791	3.92351
1716.04	-14.4894	2.74956	-7.44862	-2.07849	-1.93001	1.84955	-17.3179	0.327804	0.630299	1.15235	6.25565	-10.0977	-1.49444	7.34452	-5.05618	-5.45461
1717.63	-6.72	1.567	-8.77985	-1.7065	-6.69674	3.18097	-3.12477	-7.65152	-8.00258	1.77177	1.36374	-12.8841	0.412184	5.64171	-4.93125	-0.406855
1719.22	-1.04988	1.73361	0.828778	1.24464	-8.19011	0.803406	-1.37805	-6.07755	-12.6012	4.68303	-3.19857	-0.0497244	5.74216	6.97166	-6.22831	-1.19116
1720.8	-2.21306	-2.71682	6.31306	-4.8386	-12.55	-11.2794	-2.10129	-5.32867	-18.6043	5.40794	-9.13098	-4.90883	0.827996	5.40472	-12.027	4.3974
1722.39	10.8445	0.264723	2.66491	-5.28809	-20.9636	-6.80623	3.17535	-19.0826	-14.1729	14.5192	-7.63116	-13.4714	1.07834	3.6121	-9.20619	16.7777
1723.98	12.2472	2.43854	-2.2414	-7.27303	-8.06718	-10.5245	4.9541	-12.4425	-10.2855	9.1021	8.1303	4.16392	4.63042	5.12565	-9.42807	-0.395759
1725.56	16.033	1.60007	4.35734	-12.176	1.26871	-7.88487	-4.32974	-5.83007	-2.41359	5.90362	-2.3497	5.53079	3.62449	2.45586	-9.03603	-1.02352
1727.15	-0.2023	4.73609	1.9711	-9.30313	4.2627	-1.87614	-11.9631	11.4335	1.82086	0.804052	4.62913	12.0511	0.495717	0.677786	1.96633	-1.00534
1728.73	-8.72491	1.01354	10.5359	-2.45006	6.89669	6.8269	-13.7766	-3.4655	0.630516	-0.819639	-4.47802	0.98789	-2.92506	2.33904	10.7381	-2.83935
1730.32	-0.590469	4.58364	4.2633	-3.92721	-0.923085	8.02217	-10.0987	-7.13512	3.74611	7.01036	-2.65261	3.74935	-0.927363	5.25342	15.1379	-1.69062
1731.9	6.01597	3.20388	4.01724	0.997991	-4.52594	9.9181	-7.96653	0.931757	9.49258	9.71846	5.33122	3.51399	-8.29248	-3.98771	17.3139	-3.45705
1733.49	7.22953	-2.51008	-2.26629	3.68817	-2.96729	6.09576	-8.5599	0.784582	7.02497	10.5153	-6.32848	-1.5804	-3.71173	-14.0983	9.90152	1.68844
1735.07	9.68796	-4.01792	-5.55622	8.78348	-4.49054	3.15418	5.4764	-7.97668	-1.13063	13.4828	-7.96244	-1.19354	2.84556	-10.793	1.53797	2.6085
1736.65	7.95045	-4.35972	-2.80398	13.516	-0.41489	3.17488	4.48401	4.30018	-5.86095	4.72329	-1.97238	15.571	-1.59371	-6.0002	-1.34066	-6.58952
1738.24	19.0366	-2.6561	-11.8696	10.3746	-1.08039	2.49331	2.39832	12.7518	-6.10609	2.05274	-9.39571	19.0939	0.904039	-5.04323	-8.86616	-7.0663
1739.82	5.87338	-5.19042	-10.216	6.52741	-6.24594	1.29508	1.76012	10.8446	-6.7111	-4.90141	0.682999	18.1852	-1.2007	-10.4145	-2.61495	-5.65976
1741.4	-0.171099	0.844419	-9.9033	15.2082	-15.7064	-3.01165	-2.50052	-12.6941	-19.9127	-7.39368	-0.328089	5.6631	-4.68023	-2.02411	-6.03516	3.3362
1742.99	-3.2647	12.3495	-15.2587	11.4689	-18.7486	-5.63724	-2.9377	-7.07429	-13.1168	-8.77139	6.92943	2.49663	-10.2224	6.03884	-0.72979	5.74774
1744.57	-1.97573	8.86341	-8.98705	14.0895	-16.2819	-14.0005	-5.63518	5.10081	-11.1883	-14.5818	8.41632	0.35692	-14.258	-8.23552	3.37366	-0.839355
1746.15	1.29596	10.1878	-11.4194	9.88007	0.168457	-21.0953	-10.9291	4.61308	3.27238	-14.719	10.5697	8.34709	-0.198769	-6.98057	4.69593	-9.32322
1747.73	-5.15699	10.1983	-9.93996	11.9977	8.30312	-10.3319	-4.75017	8.47952	4.89075	-13.5468	1.66115	6.42762	-4.03593	-2.08283	2.60465	-0.627481
1749.31	1.06549	10.7192	0.56882	4.43988	1.93991	-6.86767	0.24667	-0.486675	13.0655	-9.1714	5.97321	20.5518	-1.87732	-4.76229	3.70987	-1.26672
1750.89	7.84193	15.6699	-7.75286	3.83261	-5.87083	-3.91208	5.45783	-1.0544	16.3232	-7.7697	12.9105	19.6344	4.40562	-4.091	-3.91294	-8.52412
1752.47	5.43856	7.09767	1.922	9.68138	-3.5028	6.51296	11.6593	4.75544	16.2437	-0.898173	22.3344	11.2278	6.1319	-2.86558	-1.94757	1.20455
1754.05	-3.9023	6.13737	6.36637	10.1718	-13.1983	20.7066	12.8864	-6.21265	0.472971	0.228607	17.2811	5.1748	-4.75602	4.43796	8.46091	8.25503
1755.63	-3.8412	-0.331832	3.13864	4.36285	-6.00322	34.6961	14.9626	-10.8126	-5.42075	5.83264	18.9884	-1.99775	-16.8204	14.5102	5.47265	4.36522
1757.21	2.13537	-5.22572	-13.7036	8.15694	-9.19776	31.0699	12.3648	-2.4881	-5.83723	7.34064	11.464	-1.46507	-10.3961	5.49429	1.41568	2.56803
1758.79	-2.31441	-1.68421	-14.8757	5.90774	-2.09907	24.9297	9.33999	-6.39675	2.22481	8.41453	14.0654	-2.0364	0.949345	9.8368	-7.0332	0.249385
1760.37	-9.91958	-0.467867	-27.2334	13.7403	2.35644	18.785	7.4496	0.075173	1.98077	2.15608	2.68214	3.05458	9.51683	8.46557	-18.9061	-0.156817
1761.95	-12.9355	11.0496	-12.3434	-0.279058	-3.31864	10.1771	-0.725136	-6.62663	11.3229	-5.59823	-11.6404	8.30498	16.4631	5.46287	-16.9363	-5.41261
1763.53	-11.3055	13.8846	4.57502	-6.18881	-0.105997	0.258551	-12.2353	-6.2571	6.66697	-7.2062	-16.4959	-6.6693	11.623	4.83892	-17.0409	-8.62268
1765.1	-5.54273	13.1352	24.3774	-3.83739	10.1515	-0.258534	-1.57525	3.77165	7.99685	0.448951	-4.10513	-3.78514	8.29974	7.29959	-1.7599	6.17754
1766.68	-2.5177	11.723	16.6816	-8.94044	-3.25984	5.41467	1.54807	3.14217	0.647864	-1.21588	5.70445	-5.52614	-7.37595	10.6159	12.465	5.01197
1768.26	8.06346	6.61287	8.81708	-8.26913	-5.02594	11.1519	4.03689	-14.3421	-8.16634	10.0679	13.7298	-13.6021	-5.35465	14.0892	7.50913	-0.25324
1769.84	15.2463	7.76951	-2.96477	-5.06769	1.05997	0.50291	7.28356	1.88896	-2.99596	8.53957	5.08293	-9.60258	-6.79697	12.4546	0.0840541	8.13032
1771.41	0.431437	1.18466	7.64925	6.57253	1.46754	-5.37042	14.3231	3.9699	-0.766143	3.26971	13.4823	3.6166	-5.85277	4.72411	-6.31411	3.07856
1772.99	10.6848	-2.38387	-8.13261	20.9313	1.02521	-16.8606	0.604748	10.5436	6.09047	3.24036	5.86715	15.2899	10.2846	-9.1242	-11.7907	-9.42216
1774.56	3.48642	-0.92495	-2.92251	17.6182	-2.36671	-13.9264	-11.1756	10.5848	4.97769	-4.51495	-3.08493	24.133	1.95893	-13.7207	2.19364	-14.0192
1776.14	9.46534	-14.4034	2.16557	11.9361	1.74312	-15.2067	-11.5836	-8.10241	-0.914576	-6.97381	-8.21746	9.40675	-6.00549	-12.9298	-3.3087	-19.7726
1777.71	14.1094	-10.3752	-4.6589	9.91107	-0.89327	-15.6412	2.8984	-6.95697	1.44189	-11.9422	-9.33986	25.9006	-7.40675	-18.01	-2.90953	-17.2963
1779.29	1.41723	-15.7368	1.3042	1.08226	-3.05593	-8.6607	-1.12724	2.89218	-4.10973	-10.4751	-25.3536	14.0564	-7.46465	-14.5129	-7.86072	-8.75431
1780.87	2.29666	-13.5602	7.92646	-5.66957	-13.1893	11.911	-4.30663	11.3768	-6.32572	6.27718	-27.3218	6.21245	2.86605	-7.13786	12.3777	5.22123
1782.44	0.856674	-1.31755	-0.798989	-7.08467	3.83042	17.209	7.02808	22.2334	-6.73803	8.45412	-14.0163	0.592477	-4.10997	10.1433	9.24985	14.8596
1784.01	-8.44507	-1.91898	14.4171	5.4289	-5.59508	22.7311	16.5417	14.4436	4.22794	10.5495	-7.99705	-12.7178	-11.0993	8.65993	6.954	22.7791
1785.59	12.0685	2.82204	6.52101	8.31818	13.2249	7.90768	2.98928	6.63718	10.9341	12.7218	-10.9365	-8.55803	7.53546	1.68906	1.67748	17.8142
1787.16	6.13079	9.74644	-1.21058	11.3049	17.0407	-14.7156	3.48241	5.4268	9.1153	-2.12864	-2.62879	12.9502	6.31066	-1.74572	-2.85978	14.1104
1788.73	3.67441	15.2123	-10.5594	-1.25008	26.3834	-32.0514	14.5681	7.02049	9.11493	-9.61958	4.65869	7.54123	10.0602	10.3537	-28.4592	5.83699
1790.3	10.7047	18.5907	-25.7039	0.0182519	7.04656	-25.4393	4.85145	10.8528	5.27458	-6.90822	-3.89537	-3.14894	-3.81599	2.78593	-30.734	2.51488
1791.88	-10.4239	5.6141	-3.72867	-25.711	1.21489	-15.625	1.66175	4.09131	-2.9662	-4.75649	-14.5629	-9.76887	-5.52233	12.6273	-11.5139	1.15027
1793.45	-14.1417	7.39763	-2.01067	-19.136	-16.1493	9.532	-4.96859	18.1076	-6.47162	1.30383	-11.6785	-10.9121	-7.23919	14.1113	17.3546	6.26922
1795.02	-11.4921	9.95209	-5.30383	-23.3763	-0.36921	19.2983	-0.765678	9.38285	3.60613	3.25696	17.0654	-9.39876	-7.4786	8.28749	27.198	3.98312
1796.59	-16.5575	7.23125	14.8912	-4.64021	-0.3501	12.236	7.96224	-11.9242	16.2397	-3.62478	1.90567	-13.8557	-4.85646	3.0922	16.4992	5.05459
1798.16	2.09567	-1.06966	7.55494	-5.99484	8.60612	9.58507	11.034	-13.0474	25.136	-1.71945	4.76869	-16.4029	2.1274	-4.50272	15.2883	-7.49855
1799.73	-0.359129	9.50125	3.73017	5.01853	8.45039	-10.1917	12.5639	-7.08174	30.5104	-0.161057	5.02744	-8.41112	9.15179	-7.47044	2.96894	-16.8508
1801.3	-1.60405	15.0075	-8.63814	-10.9553	21.3932	-8.5969	26.4035	11.4034	19.6841	9.98165	18.1022	-5.07426	21.8137	-3.91338	-0.247051	-9.68717
1802.88	18.9628	19.1574	-29.5936	-1.02253	5.87494	-19.2619	14.3359	-2.49708	12.1641	10.6637	23.4066	-4.00178	22.8329	-1.77344	-8.13513	-9.92228
1804.44	5.23007	13.9771	-14.9364	-15.5011	14.4916	-13.6718	24.4836	-17.7713	6.39867	-2.13297	9.1001	13.0742	12.3387	-2.21756	12.796	-15.9301
1806.01	-13.4967	1.20397	7.85516	1.68949	2.12311	8.12764	19.7136	-9.47392	-9.11069	-1.91844	7.57217	10.8095	-2.92133	5.39909	10.7444	-3.66332
1807.58	-11.7641	-2.05089	3.36585	-1.26211	18.7519	-5.37514	7.11569	-7.48581	1.69094	-1.85588	21.7808	11.34	-0.254488	2.78261	0.655562	-7.96118
1809.15	-16.8392	-13.9013	4.46735	2.02621	11.7955	-4.27437	6.89521	-24.3833	5.14462	-6.22336	-11.1321	-6.18236	-5.49367	3.61439	-16.79	-7.95265
1810.72	-17.9826	-22.9373	15.0281	-13.0277	-1.37645	-7.57075	-2.95251	-8.24561	15.6474	-20.0394	-9.23548	-2.95104	-4.26965	-10.6593	-19.3914	-29.877
1812.29	-19.0786	-4.44876	15.0515	-13.6425	11.2326	-9.17529	-22.8805	1.08277	11.662	-12.124	-14.832	-9.23057	3.79855	1.94201	-10.121	-39.6283
1813.86	-8.06018	-0.771683	10.9401	-18.9812	11.3782	8.6851	-4.20415	14.9941	3.04594	3.37011	-5.64317	-5.58555	10.3639	3.92645	-8.29712	-4.18165
1815.42	1.01756	12.0117	22.0246	-10.4313	9.97399	-2.5674	-12.9282	8.0155	7.76526	-2.58772	-16.5989	7.46889	12.3184	7.3625	-13.6941	-0.344128
1816.99	1.362	23.3697	14.3314	-14.3325	25.2257	10.5682	-1.75136	1.784	4.72039	9.3199	-15.5355	8.11177	-6.3885	10.0205	2.67349	6.19747
1818.56	-11.5119	-1.67664	5.09131	-0.539949	3.28178	12.4755	-4.41843	19.0608	-7.44157	4.08273	-14.5723	19.4201	-12.8125	10.3406	0.312514	4.59547
1820.12	6.01869	5.3759	-20.882	-1.16174	8.28672	-10.833	-14.06	13.7372	-1.1121	10.6353	-1.96151	14.9587	-0.569784	-0.189883	-0.709979	-4.96281
1821.69	2.96741	11.5414	-34.6256	-16.217	15.7908	-6.23195	-11.535	8.47988	3.0011	7.75924	-3.91641	-2.24047	-1.11878	-3.50842	8.60798	0.212964
1823.26	-2.22082	1.07924	-25.4227	8.40511	6.99451	-1.16036	-14.2732	-3.9764	-5.57859	-10.257	-4.55117	6.39011	0.886934	-4.28911	0.408523	-12.4861
1824.82	11.3878	-3.74029	-12.1323	-2.61553	-1.28326	6.96636	-10.9185	-12.4179	-11.0643	0.355787	-6.8921	-18.3365	-9.71233	-12.1475	14.9889	-7.39605
1826.39	11.2385	-7.75591	17.2103	14.2418	-6.25755	18.1109	3.02242	-21.9461	-21.6193	13.2542	-12.1478	-22.709	-21.0115	-4.54885	6.50476	22.6618
1827.95	-14.3729	8.4871	42.3507	-2.52451	3.45714	23.1501	-3.40298	-21.4591	-15.179	-8.78924	-20.1991	-3.08767	-3.3707	-8.54471	10.8201	5.93915
1829.52	-24.9074	24.1913	28.1869	-5.72284	11.8722	29.9256	-7.20847	-41.1738	-9.89526	-12.3978	-1.23203	-13.4499	5.18366	11.0131	2.85544	-2.59169
1831.08	-13.365	5.45446	10.8468	10.4236	1.28825	15.7996	-20.4602	-0.761811	4.80069	-14.3116	-1.01201	13.9953	14.6231	-6.65438	-4.4079	-0.0603947
1832.64	19.4981	8.07017	-16.2711	-13.6305	-6.89907	-0.128629	-16.3162	1.18721	14.1214	4.55678	5.06931	2.04246	15.9209	-5.51962	-13.7701	-17.8055
1834.21	17.2767	9.2391	-32.717	-16.8438	-7.41739	-9.70325	-14.9075	23.2849	1.83511	6.83935	3.88088	-14.5946	6.98095	3.10856	-4.14621	-8.18314
1835.77	17.2798	-10.142	-15.2611	-1.62133	-14.6381	-16.8483	-1.20731	14.2791	-21.8764	5.66574	-18.3988	-29.1786	1.08744	13.9581	-26.146	12.0933
1837.33	40.8939	-16.5303	6.6091	-20.4169	-28.3937	-23.616	10.5107	-14.0124	-1.63289	17.2556	-24.203	-40.7242	15.7703	-21.5594	-19.4878	25.095
1838.9	13.1585	-14.2783	-5.96235	-15.5667	-0.712092	-19.6354	4.88266	-14.5104	-9.19794	6.54077	-24.4315	-16.5751	9.58906	2.99867	-21.0016	-9.0167
1840.46	2.21806	2.88814	-19.0824	-21.7622	10.2345	4.81664	5.87875	12.9018	16.2002	-7.2633	3.58965	9.48689	27.5902	3.91737	-0.456872	-20.3969
1842.02	-5.00509	7.91439	-0.0459956	-12.4901	9.51484	19.5936	6.09724	-15.4989	9.48512	-15.5172	10.0765	-6.97281	13.6226	17.3219	-1.98806	-1.71439
1843.58	-2.42863	6.24144	-11.0276	-5.08598	17.3087	-2.86666	-1.45421	17.4094	5.7466	0.33463	15.4345	21.9042	15.4495	-6.29253	-13.2974	23.5215
1845.14	4.13811	-10.1327	-12.2206	-12.3666	-1.26946	-9.44948	-7.36944	35.0182	0.235571	5.17249	2.21933	14.7939	-7.71465	-11.8436	-9.34579	13.5169
1846.71	-10.0582	-17.9939	1.98831	9.5645	-12.8321	-4.25641	-20.9332	23.736	-7.40799	7.16984	-12.8102	10.68	-22.9893	-11.5077	-1.75737	28.6814
1848.27	5.30268	-8.90215	24.054	16.6403	-18.7421	-22.1686	-6.43123	21.8345	-7.79999	10.4033	-21.4953	-0.408721	1.74224	-7.98422	-17.2419	38.8247
1849.83	18.9788	-19.06	25.595	16.0562	-11.2017	-39.5656	-11.7803	3.98924	-4.94596	25.3932	-13.8288	-6.85459	10.3485	-21.7173	-8.98809	30.3913
1851.38	-10.6499	-26.9241	6.97654	18.7742	-11.0566	-3.15083	-6.81047	-9.13062	-8.74539	8.47739	-11.8616	5.38132	-10.0339	-10.1753	13.012	-10.8275
1852.95	-10.4641	-27.874	25.5633	14.2082	-5.80235	7.57133	-3.73379	-0.198795	-3.05968	4.47345	6.13274	8.69954	-24.2706	-8.88719	32.9908	-14.4687
1854.51	-18.1948	-17.307	33.2253	10.606	-12.1581	15.1292	18.6868	-26.4747	-14.6313	-12.4864	13.9482	-4.98328	-39.194	-0.859144	20.9686	-12.137
1856.06	-9.75282	0.147813	-3.30849	-9.24967	2.50474	-10.764	21.9275	-2.34375	-9.00681	-24.0308	12.0349	5.73802	-28.4883	-33.2169	9.33008	-16.2565
1857.62	7.96831	-1.07759	7.93732	-8.94853	-0.79673	-4.49257	11.0132	22.7479	-2.2073	-11.6177	-10.0882	-12.5883	-14.8463	-19.9872	10.986	-7.39129
1859.18	-0.539791	2.97199	8.38488	-7.87993	8.64399	-4.18898	9.53978	6.10961	3.5793	2.91365	-29.1119	-1.11489	-4.83013	-4.36453	2.95201	3.33127
1860.74	14.9614	26.5805	-9.45858	-6.29186	-6.87752	0.0188346	7.54155	5.96427	3.03947	9.07431	-23.3663	-10.0792	13.9054	27.506	-0.634309	7.82082
1862.3	14.1252	27.8061	-12.2155	5.22201	7.87248	-10.7084	-4.07559	9.75147	-3.26461	0.531543	-28.0162	0.51143	15.0848	24.1828	-13.5547	9.04197
1863.86	14.7838	14.8567	16.7712	1.56304	-1.23016	3.42457	-13.7058	3.64081	-6.67599	-2.42546	-26.0077	0.599158	0.918144	18.2506	6.14399	6.48592
1865.41	-1.70995	4.03204	20.5901	7.34477	-1.07929	14.3049	-8.40084	3.29979	-22.2553	-2.6004	0.803201	-3.53476	-9.05041	14.8076	6.35986	-2.50479
1866.97	16.6513	-0.95187	15.0792	4.31215	-11.8531	9.87703	-7.40097	3.6314	-13.6328	0.258029	27.6039	2.11173	4.072	-5.0123	7.2885	-12.3815
1868.53	38.5862	-14.2684	9.02925	15.0611	6.23749	1.00199	9.25926	-30.832	0.134522	-3.86903	10.3138	0.672329	7.48111	-26.2857	-3.97958	-22.5324
1870.08	38.2608	-17.2378	14.4564	13.1996	-2.85687	-5.95732	-5.32056	-13.5479	12.1407	21.9242	-3.84927	-9.14989	7.55552	-28.5536	2.21189	-0.607258
1871.64	12.6566	-14.4386	11.274	4.51186	13.9142	-4.23616	4.31124	-6.04864	10.9818	7.68817	-4.47993	3.45661	9.93107	-19.5578	-0.00736795	-11.1055
1873.19	10.3212	-5.70104	14.9771	-3.13229	0.797926	-0.154304	2.82925	-2.53573	13.1714	2.82468	5.51729	13.9323	9.03276	-11.7151	15.8246	-2.04159
1874.75	-9.14322	3.77226	15.9909	-16.2343	13.7079	-30.0378	-4.64354	17.8787	12.4928	-8.78825	-7.91941	12.9337	13.3427	-20.8001	2.04488	-2.99252
1876.3	-16.0163	16.3558	9.73509	-15.0818	-8.28945	-16.3438	-11.1454	35.0037	4.40947	5.14026	-8.12845	-19.358	-6.42834	-5.51157	-0.333112	-0.0866243
1877.86	-18.7958	22.8938	-16.772	-1.73232	-0.417689	-2.65956	4.34699	27.9943	-2.39286	-3.7565	8.0454	-36.1495	-17.4014	22.1929	-15.627	8.29473
1879.41	-2.59749	10.2776	-2.80411	-5.80705	-14.2565	11.7311	4.05361	7.56753	-2.56656	12.7328	-0.0751848	-35.8314	-18.8261	19.2222	-13.1302	24.6016
1880.97	9.12778	6.20622	17.374	3.83165	20.9445	-4.5195	3.77395	-6.15941	-0.0143935	23.6054	-4.29343	-22.2914	-5.14024	37.8066	-15.4948	25.4524
1882.52	2.27115	23.3799	14.9713	-0.562509	19.9495	-6.10806	15.669	-30.2886	5.0324	20.0045	14.3	-16.2537	3.10531	31.3295	-9.27954	27.6607
1884.07	-14.7947	22.4804	20.4661	7.85816	34.3294	-5.88069	24.0557	-34.9961	17.528	-10.8737	29.1233	-10.8543	5.3	7.27242	-3.77829	21.4719
1885.63	-15.8125	3.50301	11.1981	9.70639	2.4466	-10.4364	7.60292	-46.7282	3.92693	-22.3142	11.7258	-3.18467	17.5792	-9.80271	5.55166	12.2016
1887.18	-40.0017	0.264127	28.2645	-3.14071	20.8118	-30.5843	-0.912523	-6.48528	-10.0329	-36.0563	-10.4159	6.63953	5.08297	-12.7892	10.8385	8.77758
1888.73	-7.05538	12.2299	-13.9875	34.3304	-11.9108	-10.7647	8.93093	-6.46173	-15.3121	-12.3683	7.91912	-5.73883	-12.6318	-13.4363	-7.29472	21.7017
1890.28	-5.34097	-5.04757	-8.49003	24.6662	-0.724272	-4.15799	6.57727	-23.2773	-23.3226	-1.6197	-11.7331	-0.688476	-15.0393	6.58773	-5.92208	14.7705
1891.84	-5.01315	-19.73	-4.61304	22.8623	-6.98777	18.9901	-5.50009	-11.6921	-24.0791	27.9424	-0.73216	4.2675	-18.8151	11.691	6.53486	12.0471
1893.39	3.39605	-0.160953	4.41041	12.2642	18.2093	1.02588	-18.0314	9.27262	-10.7568	40.013	8.67529	11.2943	1.94192	14.4192	15.6929	1.01725
1894.94	-2.54138	6.60178	-2.04394	4.93374	10.7029	9.36186	16.3829	-41.4109	-7.1359	27.8104	17.2648	-0.454126	5.24845	13.0989	3.32828	-6.11043
1896.49	-20.7755	1.23973	0.18029	0.0490402	6.39429	24.248	7.51707	-17.832	20.7721	2.43928	2.2368	-8.64863	-12.6763	-13.4426	15.2713	-3.03943
1898.04	-14.0723	-5.52061	-16.6307	4.55521	-21.5711	7.09775	-5.50631	-16.5416	-6.39079	-9.89202	-27.296	-21.6694	1.52837	-4.15357	-12.5593	-17.5143
1899.59	-10.5805	-1.28612	1.41568	-3.40072	-4.56486	-9.90204	-12.5599	2.08421	-5.90478	-15.1147	-20.3172	0.398126	-3.90921	-10.8785	-3.30599	-16.9114
1901.14	13.2253	-7.64466	-9.62484	0.809491	-15.3785	2.10873	-7.80807	-11.9999	-1.6419	-1.1798	0.31814	6.05173	0.563577	-15.7041	-11.6507	-15.9363
1902.69	2.99101	-14.914	7.097	-7.42191	-4.42659	-10.4403	-8.5217	-28.035	-11.0362	6.90214	-14.4294	20.092	4.97357	-4.57459	-6.61578	-28.9884
1904.24	3.03467	-19.7332	-3.75726	-7.26195	-1.91149	-11.3591	-9.49912	-26.527	-5.36462	2.65507	-4.22544	32.7371	2.22845	2.90905	-0.645102	-37.5327
1905.79	6.96736	-0.177167	-9.74676	-4.33799	4.19665	-21.4901	-6.10864	-13.1058	7.0797	-2.89609	14.5574	36.3489	4.77118	6.22185	-8.23155	-25.8314
1907.34	-2.29531	-0.531082	-5.43643	-11.5746	5.78135	0.734845	3.328	-27.1311	14.2831	-4.5313	27.0444	29.7092	-5.49197	14.7559	-5.22165	-18.0874
1908.88	-6.1435	1.61959	5.91311	-2.26906	3.33531	14.5165	-0.936946	-0.324966	18.4017	-5.25835	16.7621	17.3433	-18.4594	4.5805	14.5803	-5.58076
1910.43	-10.7565	5.74757	13.3372	-5.37447	5.63753	-1.07755	-6.00531	-15.8174	-3.96962	-6.64119	-2.20955	-3.53384	-15.2477	12.2803	6.97767	-14.8644
1911.98	-17.1357	13.103	9.35834	2.93349	13.393	1.28638	-2.73937	-8.44241	-4.40536	-6.43445	5.95428	-8.26036	-21.0131	2.84452	15.2875	-0.26162
1913.53	-14.6753	19.6111	-2.46385	-8.32156	11.1721	27.5303	4.04248	14.7013	0.761439	-2.77536	20.2638	-12.4785	-20.604	6.45235	20.3624	-8.98658
1915.07	-16.1994	31.1774	8.57633	-8.90543	16.4936	11.2381	4.83436	7.60794	5.09276	6.3842	21.2611	-22.347	-21.0273	11.7355	8.90924	-10.64
1916.62	-6.78512	9.3971	7.06422	-18.4855	-5.37132	26.0178	5.02762	-8.07047	-0.559907	7.93964	0.859236	-19.7591	1.9057	19.5728	3.11132	-8.30711
1918.17	-1.75525	2.18464	7.52178	10.0528	-8.25646	18.2745	0.403293	10.6656	2.11945	19.7861	15.5552	-13.2074	13.7813	-4.43453	-12.754	4.37352
1919.71	-2.16147	2.26618	19.6895	-7.18164	-9.24563	39.3701	0.743708	0.325767	4.93259	30.9936	8.9556	-13.2978	5.45326	-11.7554	6.60893	21.3996
1921.26	17.9976	-10.0522	7.31814	16.8926	-24.1684	15.3871	-2.16457	-7.62481	-12.1636	32.0422	-2.55687	-4.194	14.2681	-32.5637	-0.894297	12.2912
1922.8	18.8045	-6.05641	-3.45374	4.20942	-19.3989	16.0616	-3.92076	-24.1903	-3.01249	22.2679	6.85688	15.2464	14.993	-27.9522	-3.23192	-2.93338
1924.35	16.0226	-10.1212	-10.0802	31.5836	-28.553	20.834	-3.15825	-25.3087	3.65798	8.64854	8.34477	18.1438	3.44192	-32.0479	-6.06783	7.54908
1925.89	2.1773	-4.87254	-17.2599	-3.74528	-17.7619	15.7297	-11.9782	11.3979	20.6469	2.72918	6.47784	37.4327	-7.30073	-10.9939	13.187	-4.76704
1927.44	-7.09143	-4.4443	-16.2716	6.05398	6.72447	0.485398	-1.44725	26.2202	36.0604	2.73948	22.5499	30.0556	-3.93678	1.99672	-6.91362	0.0461249
1928.98	8.20935	-0.859945	5.23598	-6.65773	12.2401	-4.65605	-6.87136	24.8057	16.8524	-12.4943	11.7052	21.944	5.90931	19.4336	-2.70171	0.640702
1930.53	-8.82163	17.7939	-10.7859	12.8621	16.9952	-6.04397	5.03615	45.7358	12.8593	-18.3681	25.9579	8.48131	14.1428	5.52089	-0.611818	-5.06402
1932.07	-30.2336	19.2258	9.58848	-13.1098	33.3052	23.1697	26.8676	32.1914	3.48393	-34.0934	1.25481	0.782659	7.7842	3.3217	16.2597	2.24009
1933.62	-7.42769	32.9804	-1.11972	0.248927	37.7346	-28.9267	11.0075	16.5877	-5.77105	-34.5333	20.1514	2.69785	24.131	-15.4576	5.82216	-17.9875
1935.16	-5.88781	38.8283	6.47376	-6.20607	36.2485	-8.55865	11.4188	10.8897	8.44419	-18.3367	9.1909	-4.37506	7.00688	0.400758	16.8123	2.78058
1936.7	-6.43388	19.6342	1.30624	20.4676	25.5871	-16.7876	-1.76607	-7.76919	15.1369	-14.3734	7.47784	-12.6103	-16.0723	-9.75581	4.97884	-10.131
1938.24	-6.33018	-6.90052	-0.409717	16.8441	-2.32587	-14.6112	-21.4896	-27.192	25.5495	-19.3876	-38.1442	-3.07801	0.0178661	-11.4131	-2.14923	-2.20881
1939.79	-4.81556	-16.5913	-34.0127	28.7152	-15.3192	-14.0401	-16.9409	-12.1352	22.6381	3.77186	-18.0557	-2.13166	3.31002	-2.22262	-16.8496	25.3138
1941.33	15.4949	-19.1145	-22.8582	-12.0684	-40.6081	-21.6951	-9.04324	12.7846	-3.19454	-4.82551	-20.3066	-6.88989	-7.94029	-1.32545	-7.61234	30.7969
1942.87	-11.0514	-10.4368	-43.4546	-9.14797	-45.2641	13.0677	16.5949	30.0561	-12.8979	6.18397	14.2692	-9.27238	-16.3254	1.43248	-5.74586	17.2815
1944.41	-21.1337	-19.4932	-33.3782	-11.4138	-25.1482	20.1794	13.0034	-4.90116	-18.0845	6.07279	4.28439	-5.93467	-6.73713	8.39285	-24.3404	-7.16467
1945.95	-4.30747	-0.204918	-30.5775	-13.4611	-1.46662	3.5501	8.8199	-13.4932	-11.647	19.2818	15.5486	-20.3048	5.46841	21.1212	-21.4664	-10.9059
1947.49	-4.88848	-7.88973	-14.2089	-17.0824	27.9625	22.5387	16.2171	10.4084	17.2803	17.7382	8.56493	-18.2486	-14.4094	24.6652	10.1066	12.5707
1949.03	4.21424	-8.83963	-7.53439	-21.6929	35.6511	-10.0229	32.1375	9.40963	18.8431	-11.1662	34.2012	-15.569	-15.7938	27.6799	-13.1698	-16.5782
1950.57	9.40593	-31.329	-1.44426	8.44613	26.3929	-8.13756	-6.5932	-32.9386	24.6215	-26.6498	-21.209	-15.3586	-1.38829	1.91231	-10.6951	-11.4847
1952.11	-21.342	-28.0332	-12.8353	13.4666	30.0992	-17.1895	6.79148	-34.3933	6.2178	1.0368	15.9602	0.366029	0.41936	15.5728	-4.57243	2.05147
1953.65	-10.9045	-28.7058	18.431	6.69324	2.92506	-16.9847	22.6501	-9.90618	1.3877	6.29421	25.4784	-6.64445	5.28721	-13.8949	5.66608	2.34812
1955.19	-25.8575	10.4719	31.039	13.7346	18.0518	1.53684	12.1735	25.8751	4.66694	0.724721	52.7775	6.22186	-11.4613	-3.77921	23.0547	-4.42872
1956.73	17.8563	-11.0406	11.1333	16.2207	19.266	-7.34218	9.91935	27.2988	3.51556	9.49425	25.2101	-6.14756	-8.29545	-9.32968	8.35047	-22.3153
1958.26	24.7521	7.87829	9.97678	24.3978	22.4447	0.698936	9.24578	17.328	-2.71473	19.7427	16.1787	-4.45794	9.54376	-0.594916	18.8033	-20.4645
1959.8	45.262	11.3373	-16.2276	17.6723	7.08118	6.03784	-1.24709	43.2194	10.2044	26.626	17.4768	6.97277	9.5633	-6.69024	20.334	0.473269
1961.34	40.2342	10.1445	-0.419339	7.04149	-11.9123	-10.2961	9.6801	37.6464	6.04776	-2.0334	-7.82885	3.29232	9.05224	-5.50542	2.18777	13.8649
1962.88	18.0323	-0.120278	-19.3106	15.6607	-5.47019	-19.3553	-7.39237	2.49866	-6.53352	-14.1921	-9.98549	3.5413	-1.73465	6.78506	-4.85658	6.28748
1964.41	-19.2803	-3.94575	-25.1783	23.4122	-21.4192	-17.9618	3.47151	-28.2825	-43.4429	-12.3471	-9.33295	-7.72663	-6.14308	27.6749	-18.8521	2.10991
1965.95	-19.0976	8.87673	-6.10232	6.74715	-18.7424	6.35198	11.0161	-23.7023	-32.2661	-15.2574	-1.8416	-12.8639	-0.720505	8.86359	-18.0876	19.4237
1967.49	-37.1633	4.76944	-29.7573	13.0848	3.51384	20.4341	-0.21594	0.326419	-21.1338	-30.153	17.7558	-2.34623	-25.1521	10.5978	7.14427	13.413
1969.02	27.9056	-43.9751	-42.5561	0.789191	3.87709	25.4777	31.5259	-13.0369	-12.8039	-5.16141	8.57694	-8.11826	-16.5911	-7.45398	-1.54171	-6.91533
1970.56	-6.9112	1.50257	-18.0582	7.38737	25.6524	-6.43998	27.5545	-27.6279	-14.3615	-27.0883	-2.80481	11.6132	6.79566	20.3754	-29.3278	-22.0838
1972.09	8.38574	-21.3093	-7.07423	-30.7081	13.2463	-4.31326	32.358	6.44649	-9.94699	-19.3857	3.72587	7.45443	-19.1332	9.19937	-23.2629	-10.0729
1973.63	33.3851	-25.3474	15.2296	-20.1092	-15.7473	-27.7504	17.7929	15.1958	-0.365294	-0.279095	-4.01825	-2.82201	-20.6603	-23.7059	-9.62696	27.2627
1975.16	23.5392	-28.2491	17.826	-43.0895	-9.38205	-36.5076	-10.3409	37.7649	-9.98086	22.0661	-10.4005	3.3462	-7.7644	-13.2777	9.20583	18.0806
1976.7	0.658786	-19.944	25.2262	-20.3593	-34.9363	-22.1548	-32.2055	31.4266	-21.735	7.33206	-24.5828	21.3062	2.53491	-5.97205	40.015	18.1886
1978.23	-13.2765	23.203	-2.51029	0.373039	-31.6121	0.83722	-8.89103	35.3255	-8.2634	-14.9467	-3.70128	3.55953	16.5763	-4.93463	47.9726	31.9161
1979.77	-24.5996	14.3001	-19.1812	40.6462	-23.8964	9.18789	0.972485	26.6072	-7.23849	-22.0957	30.1764	-7.18251	-5.13079	-8.79307	34.1129	13.1044
1981.3	-2.8695	8.20706	-9.51981	39.4406	-32.2956	8.1982	3.41879	12.8491	-8.44362	-12.5767	12.2401	-14.3696	-6.56517	-7.44076	-3.06784	3.16168
1982.83	-24.6317	36.7382	1.57667	13.9704	-4.14337	-12.7139	7.801	16.8103	-3.43064	-24.6501	-6.87115	21.9855	13.101	-0.309386	-15.0015	11.8077
1984.37	-4.84134	11.6477	-2.24169	-28.7528	8.53249	-7.89171	11.0753	2.11447	-11.8813	-16.6171	2.08836	11.8258	5.35936	-0.194663	2.14135	13.5183
1985.9	0.3895	9.3591	-37.0074	-7.10882	-18.7188	-5.67363	0.625851	-1.43817	-14.5446	4.7555	-15.0248	-1.53485	9.35939	-6.30709	-5.66009	26.3518
1987.43	18.538	-9.29653	-32.9299	-13.823	0.198463	-30.503	-11.4355	-2.98451	4.0904	33.1923	-13.9	14.189	31.393	-12.8063	3.05656	11.7412
1988.96	21.6195	-10.9736	-19.5852	-11.5178	-6.36439	-10.815	-19.9561	-26.9048	6.50888	23.3372	-16.9341	21.7999	14.7279	-3.365	27.9349	5.01475
1990.5	-1.22925	2.98465	-6.53485	5.11105	8.31037	-9.65573	-1.82059	-6.5636	2.83105	-16.7648	-19.8399	9.03532	6.63042	7.34154	16.8543	-0.699777
1992.03	-12.1952	-9.79202	18.5068	1.21907	14.4629	-8.27745	2.58665	-4.31118	-12.5428	-26.2401	-24.474	2.45843	-15.3217	10.592	13.5825	-18.4572
1993.56	-8.89977	-6.20294	33.6544	1.29222	-0.907107	-23.7833	-18.7084	18.3884	-13.9771	-22.9766	-39.18	4.43013	-19.8483	4.52546	-5.45419	-3.07786
1995.09	-5.08544	1.57778	27.6085	-8.79128	13.9806	-10.7251	-16.4906	18.4921	1.72643	-14.3646	-36.1964	30.7013	12.8939	9.73158	-13.9885	-5.18477
1996.62	-9.864	7.35097	-1.76019	-0.0958324	0.7401	8.50564	-19.2757	-7.2339	7.10151	-25.9957	-12.2017	9.65564	19.6477	31.0414	-16.9516	-24.9039
1998.15	-17.4931	9.8361	-3.01823	15.2825	-17.9339	14.8578	2.85242	0.173552	-9.64068	-19.2533	-3.74022	-4.32442	3.52017	21.6776	-19.2503	4.29687
1999.68	0.0158146	-13.3501	-3.34165	-12.3429	-15.6402	18.9921	20.0924	-30.274	12.5969	6.91466	21.3931	2.67	21.2809	17.0371	-15.1244	-25.194
2001.21	9.14318	-22.0981	17.8399	-44.0364	-21.926	37.9275	14.6579	-19.3438	-5.0104	42.4529	-1.32667	-16.685	12.2985	20.6572	2.60844	1.80302
